# Supplementary material
Source: PubMed Central journal article supplement (PMC3164213)

**Pinene-driven iminodiacetic acid (PIDA):  
A powerful ligand for stereoselective synthesis and iterative cross-coupling of Csp<sup>3</sup> boronate  
building blocks**

Junqi Li and Martin D. Burke\*

*Howard Hughes Medical Institute, Roger Adams Laboratory, Department of Chemistry, University of Illinois at Urbana-Champaign,  
Urbana, Illinois 61801*

**Supporting Information**

Part B

IV. NMR Spectra

S54

Pulse Sequence: s2pul

Solvent: DMSO  
Ambient temperature  
File: 062211\_JL\_pida  
INOVA-500 "sunds1"

Pulse 45.0 degrees  
Acq. time 4.096 sec  
Width 8000.0 Hz  
4 repetitions  
OBSERVE H1, 499.4322728 MHz  
DATA PROCESSING  
Line broadening 0.3 Hz  
FT size 65536  
Total time 0 min, 16 sec

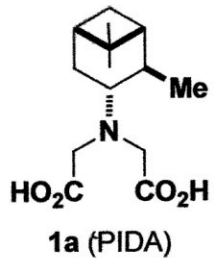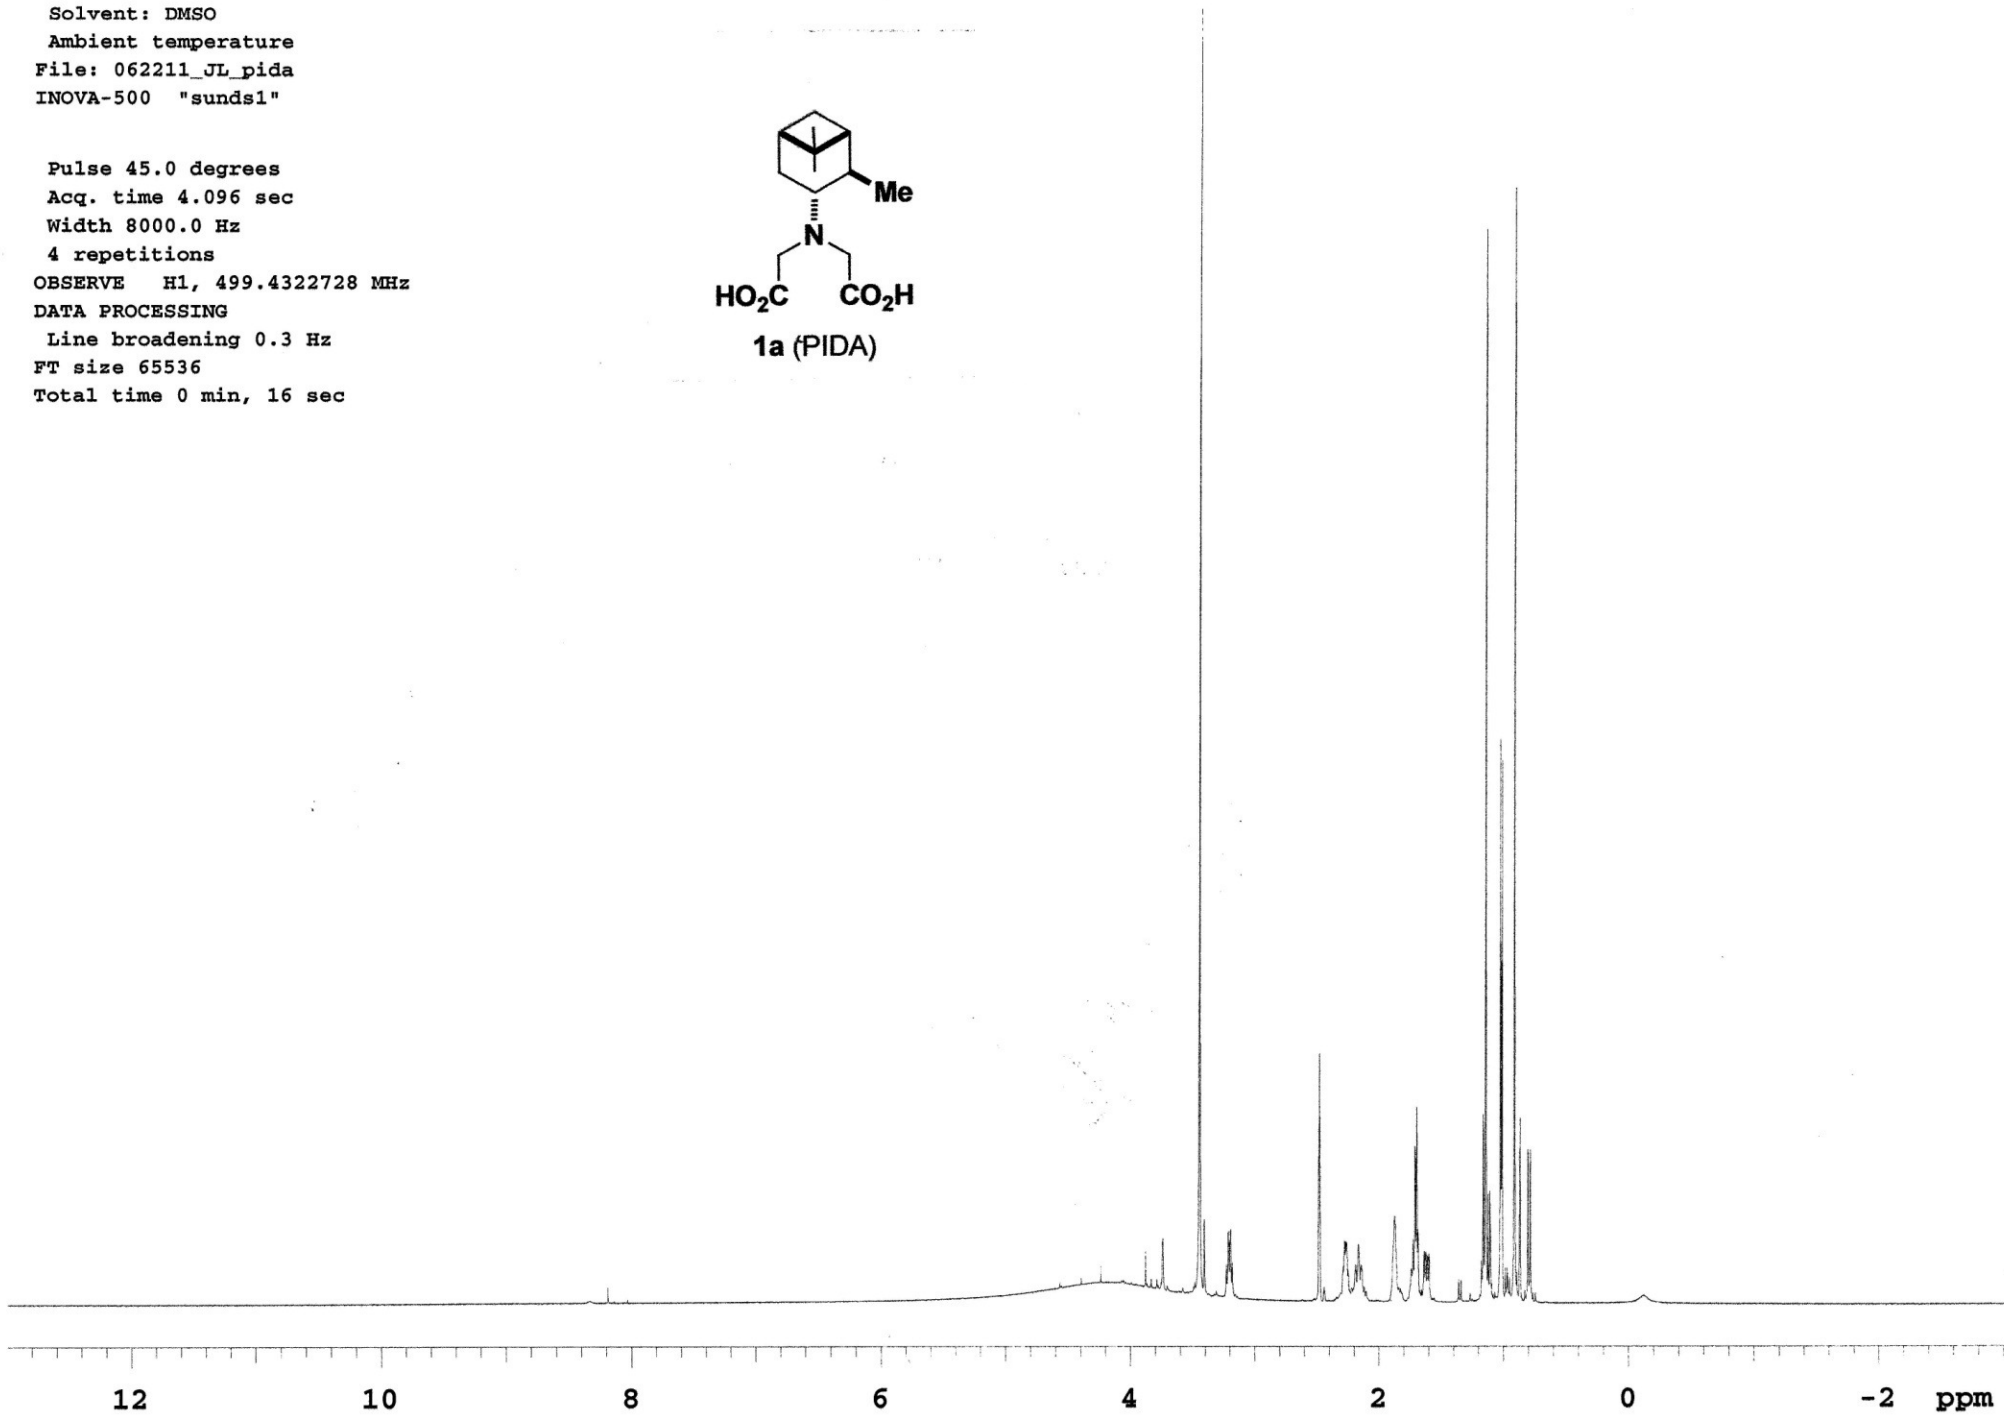

Pulse Sequence: s2pul

Solvent: DMSO

Ambient temperature

User: 1-14-87

INOVA-500 "vxxr500"

Relax. delay 1.000 sec

Pulse 45.0 degrees

Acq. time 1.024 sec

Width 32000.0 Hz

3056 repetitions

OBSERVE C13, 125.5823132 MHz

DECOUPLE H1, 499.4339361 MHz

Power 48 dB

continuously on

WALTZ-16 modulated

DATA PROCESSING

Line broadening 1.0 Hz

FT size 65536

Total time 5 hr, 38 min, 51 sec

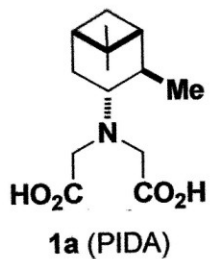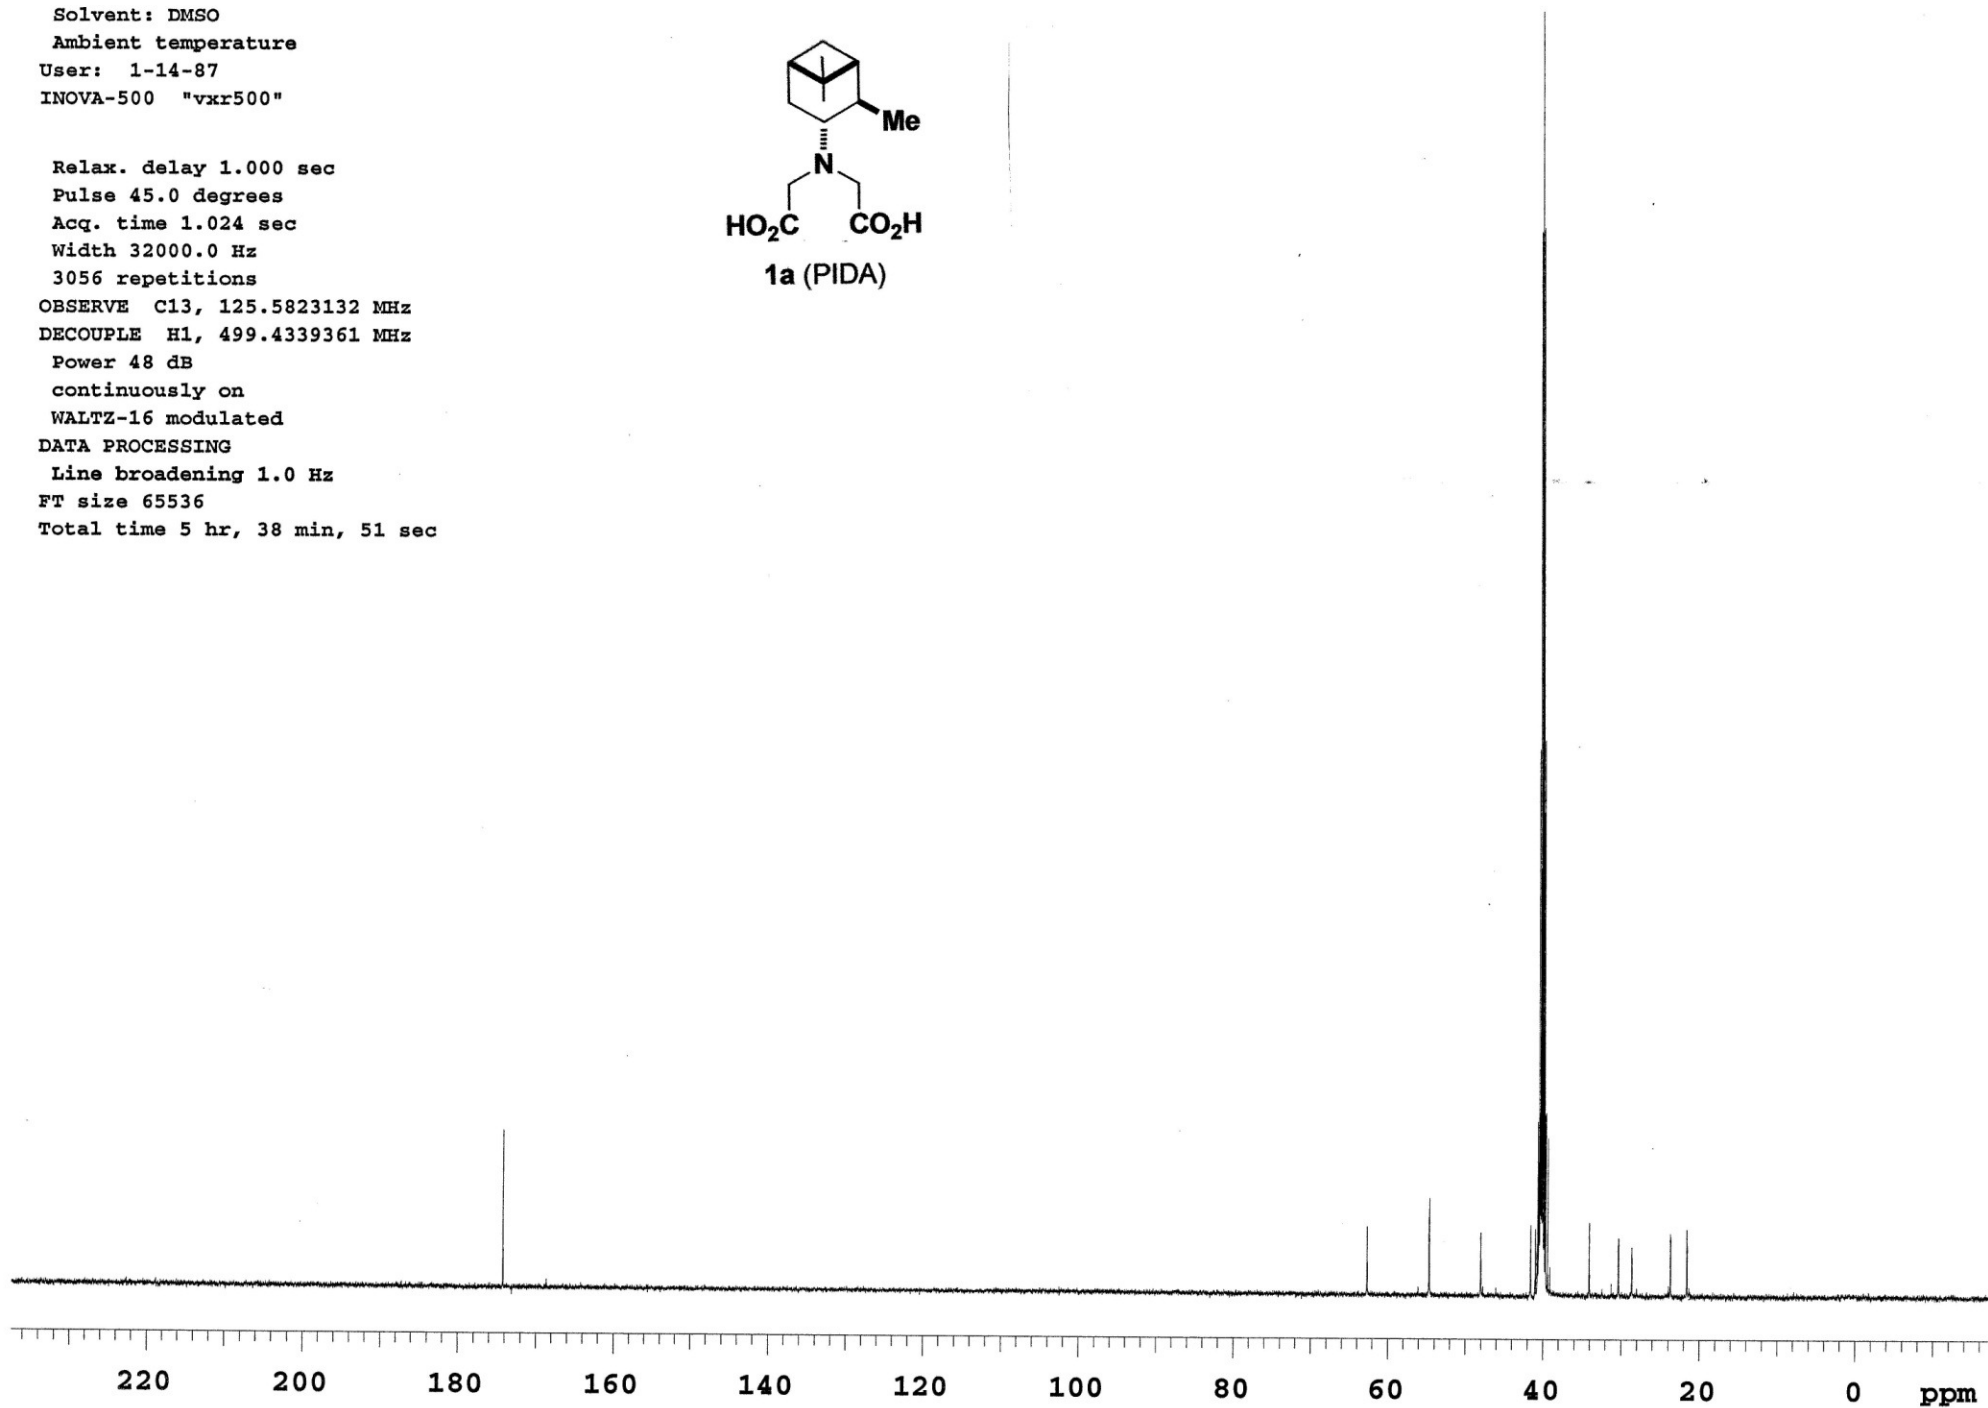

Pulse Sequence: s2pul

Solvent: DMSO  
Ambient temperature  
INOVA-500 "u500"

Pulse 61.6 degrees  
Acq. time 4.665 sec  
Width 7024.9 Hz  
Single scan  
OBSERVE H1, 499.6930328 MHz  
DATA PROCESSING  
Line broadening 0.3 Hz  
FT size 65536  
Total time 0 min, 4 sec

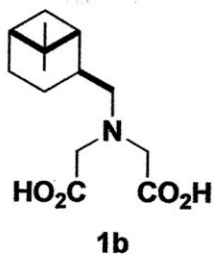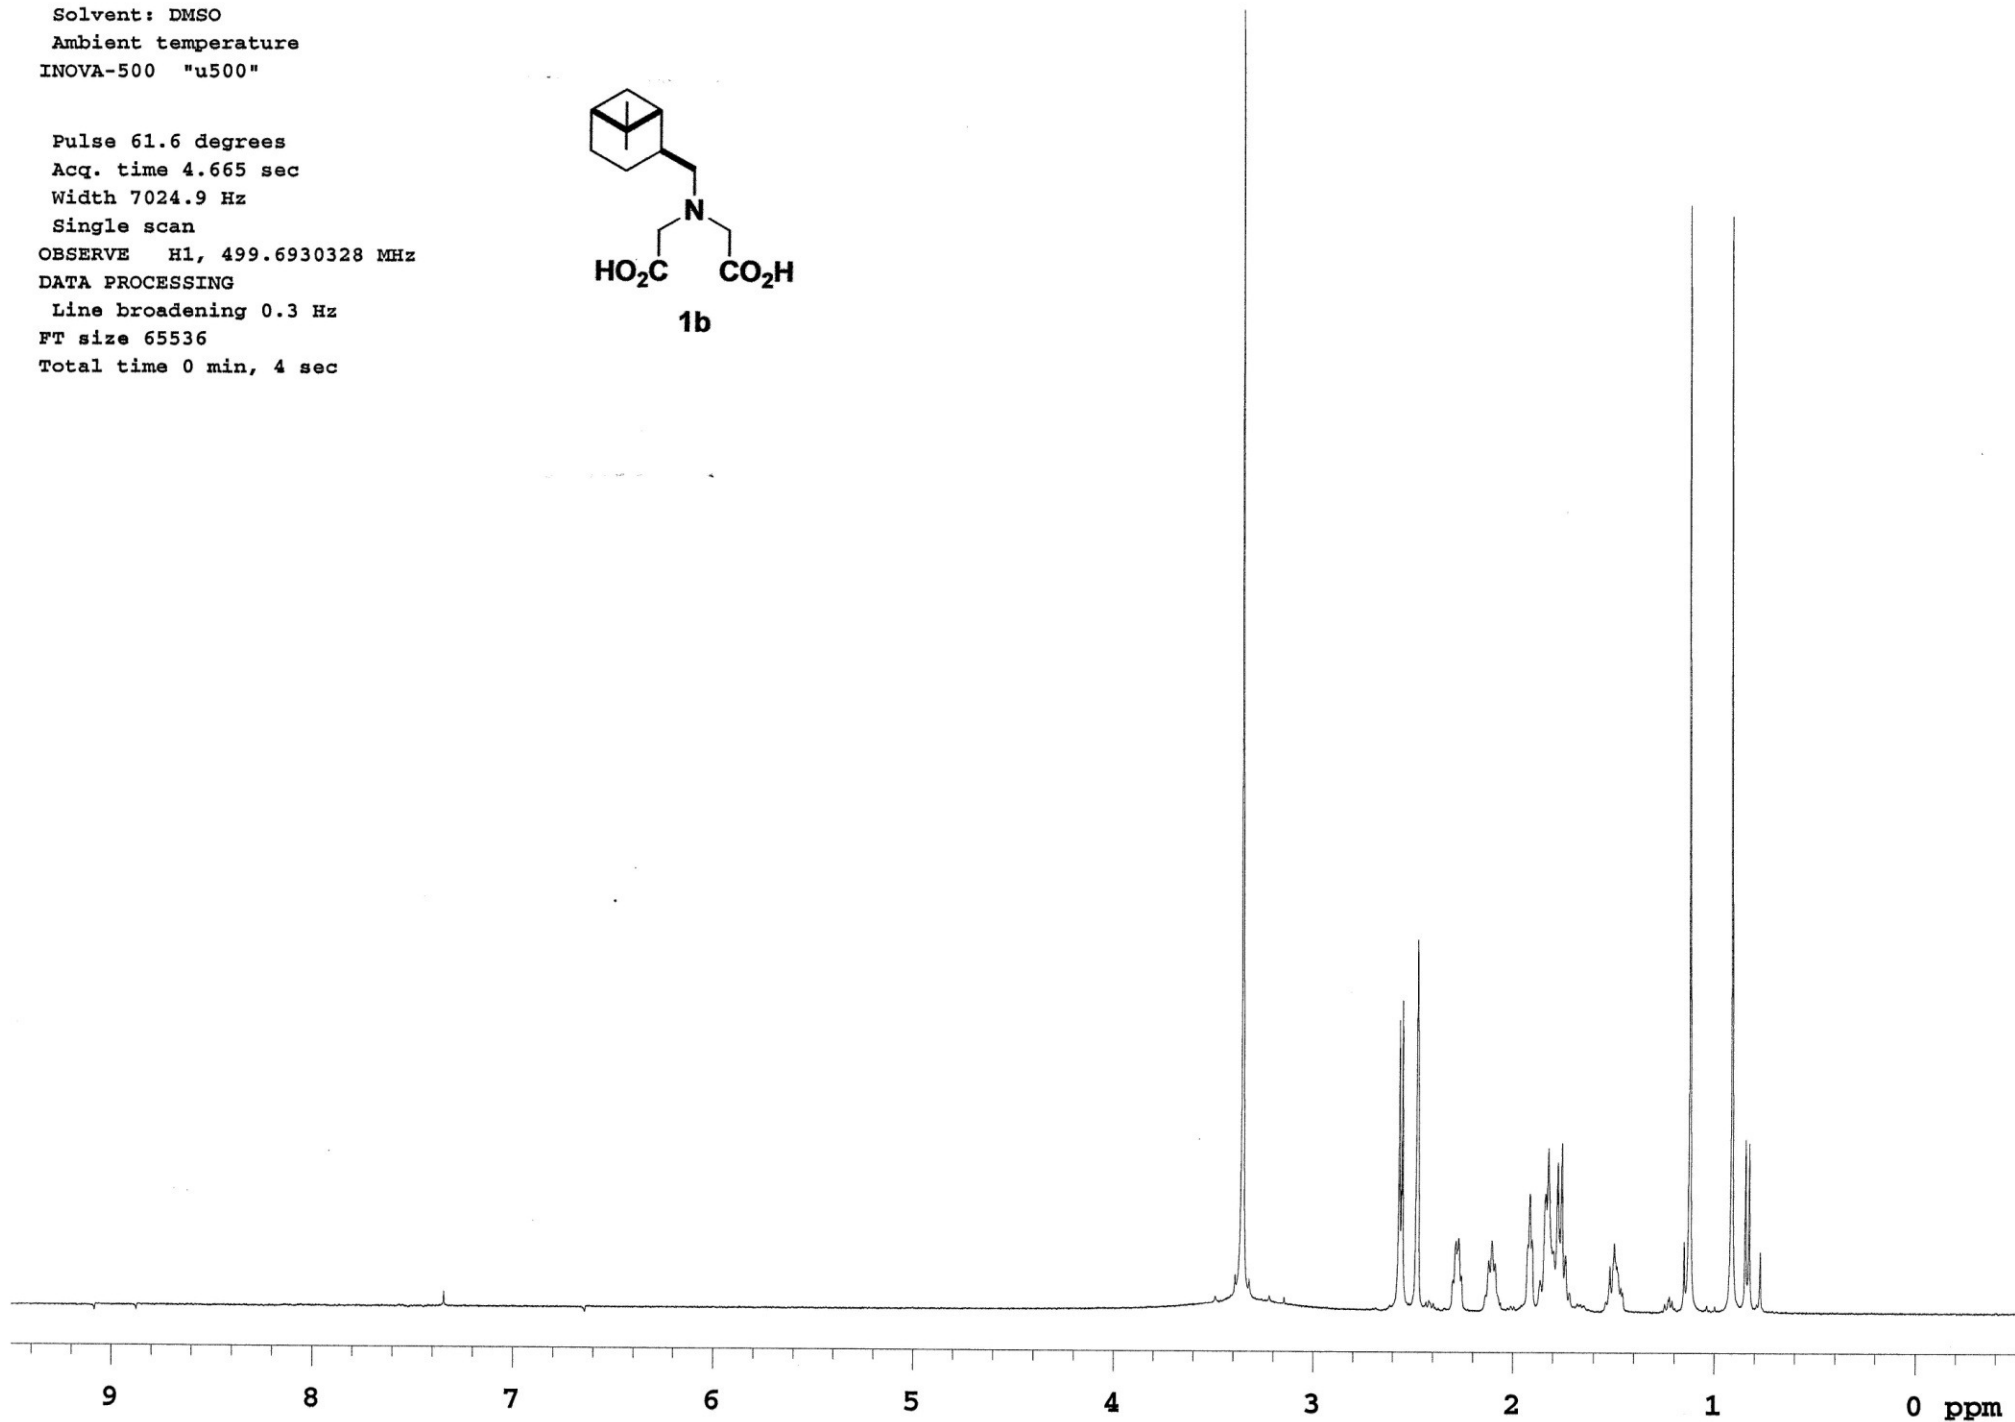



Pulse Sequence: #2pul

Solvent: DMSO

Ambient temperature

User: 1-14-87

INOVA-500 "vkr500"

Relax. delay 1.000 sec

Pulse 45.0 degrees

Acq. time 1.024 sec

Width 32000.0 Hz

2992 repetitions

OBSERVE C13, 125.5824038 MHz

DECOUPLE H1, 499.4339361 MHz

Power 48 dB

continuously on

WALTZ-16 modulated

DATA PROCESSING

Line broadening 1.0 Hz

FT size 65536

Total time 5 hr, 38 min, 51 sec

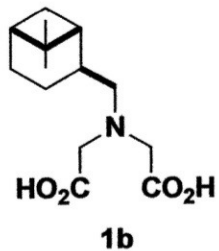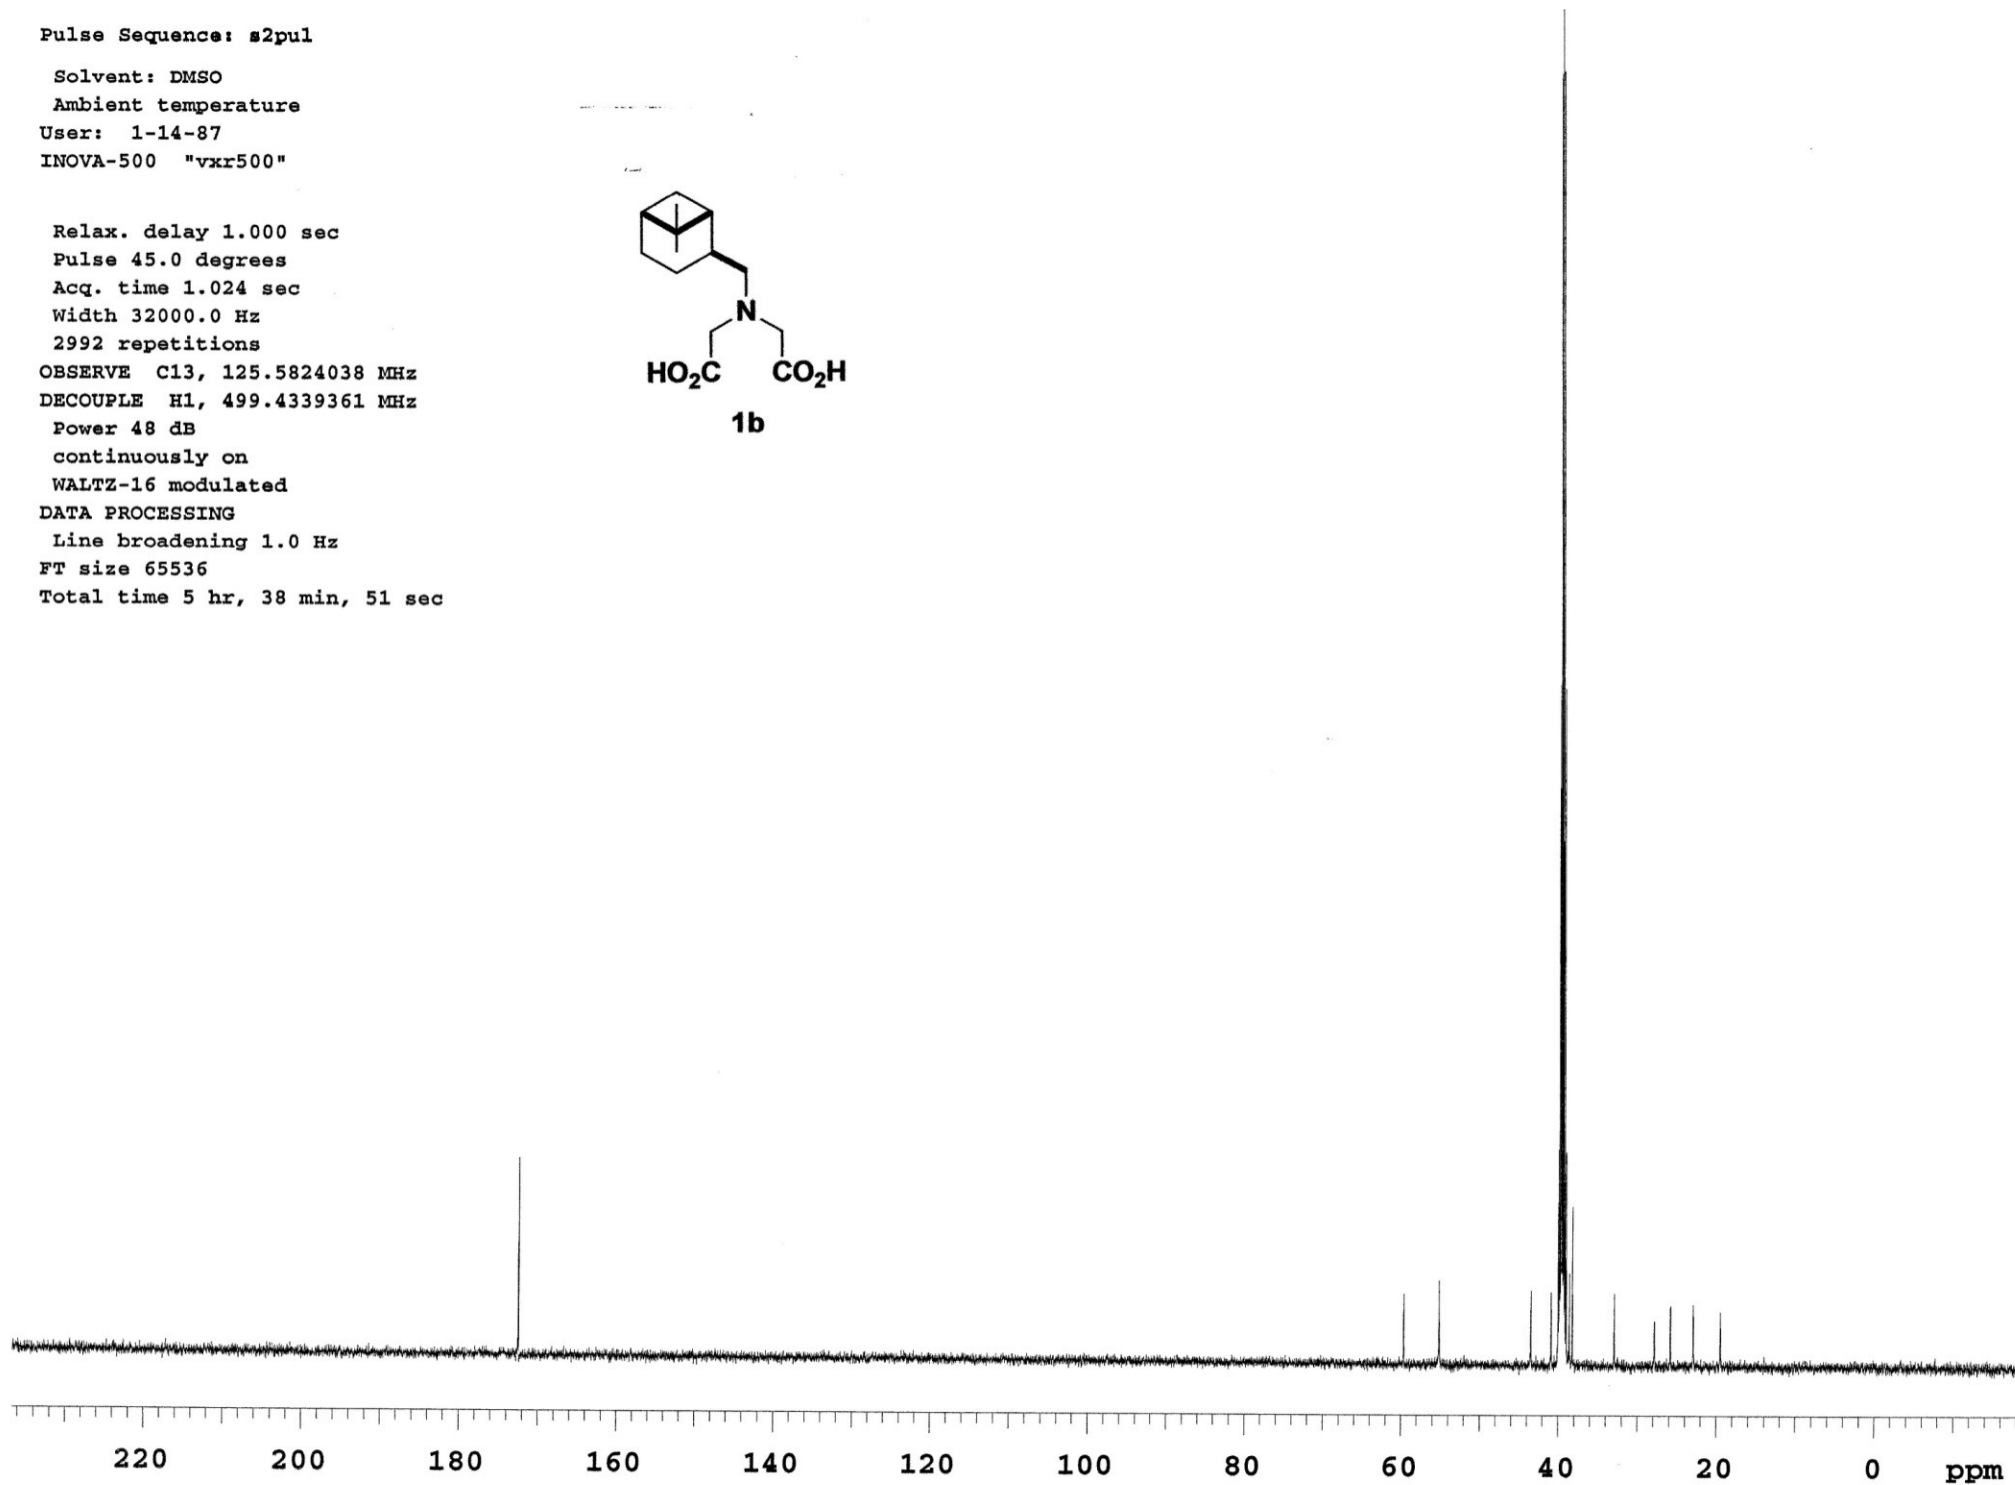

Pulse Sequence: s2pul

Solvent: DMSO

Ambient temperature

INOVA-500 "vxr500"

Pulse 45.0 degrees

Acq. time 4.096 sec

Width 8000.0 Hz

8 repetitions

OBSERVE H1, 499.4322733 MHz

DATA PROCESSING

Line broadening 0.3 Hz

FT size 65536

Total time 0 min, 32 sec

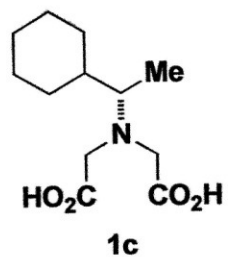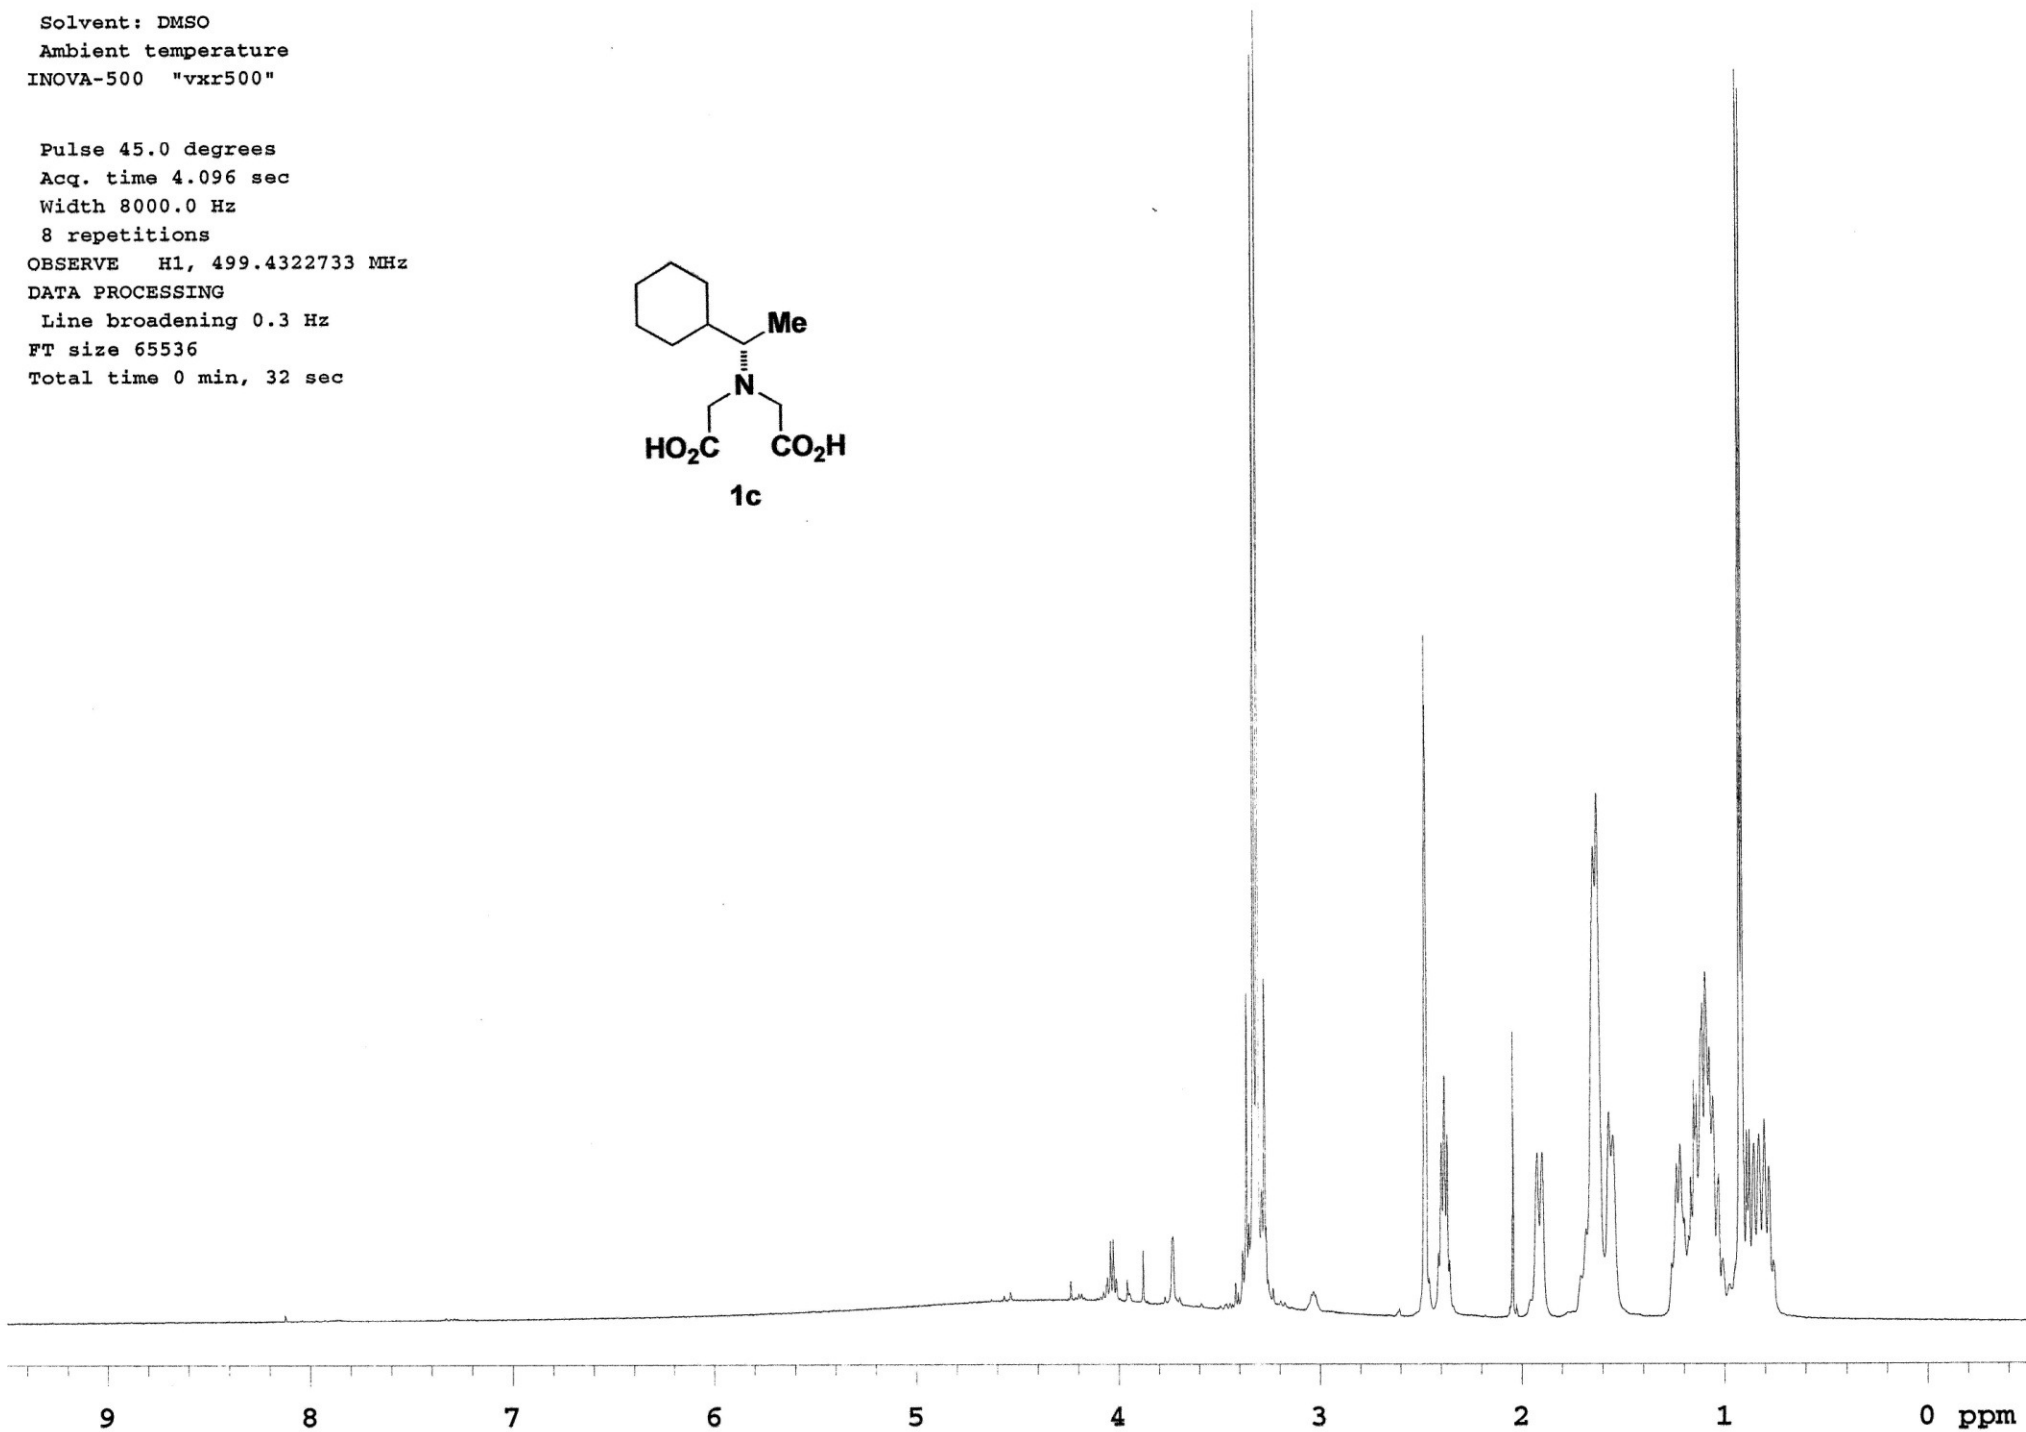

Pulse Sequence: s2pul

Solvent: DMSO  
Ambient temperature  
User: 1-14-87  
INOVA-500 "vvr500"

Relax. delay 1.000 sec  
Pulse 45.0 degrees  
Acq. time 1.024 sec  
Width 32000.0 Hz  
816 repetitions  
OBSERVE C13, 125.5823969 MHz  
DECOUPLE H1, 499.4339361 MHz  
Power 48 dB  
continuously on  
WALTZ-16 modulated  
DATA PROCESSING  
Line broadening 1.0 Hz  
FT size 65536  
Total time 5 hr, 38 min, 51 sec

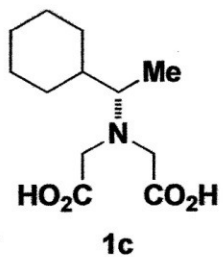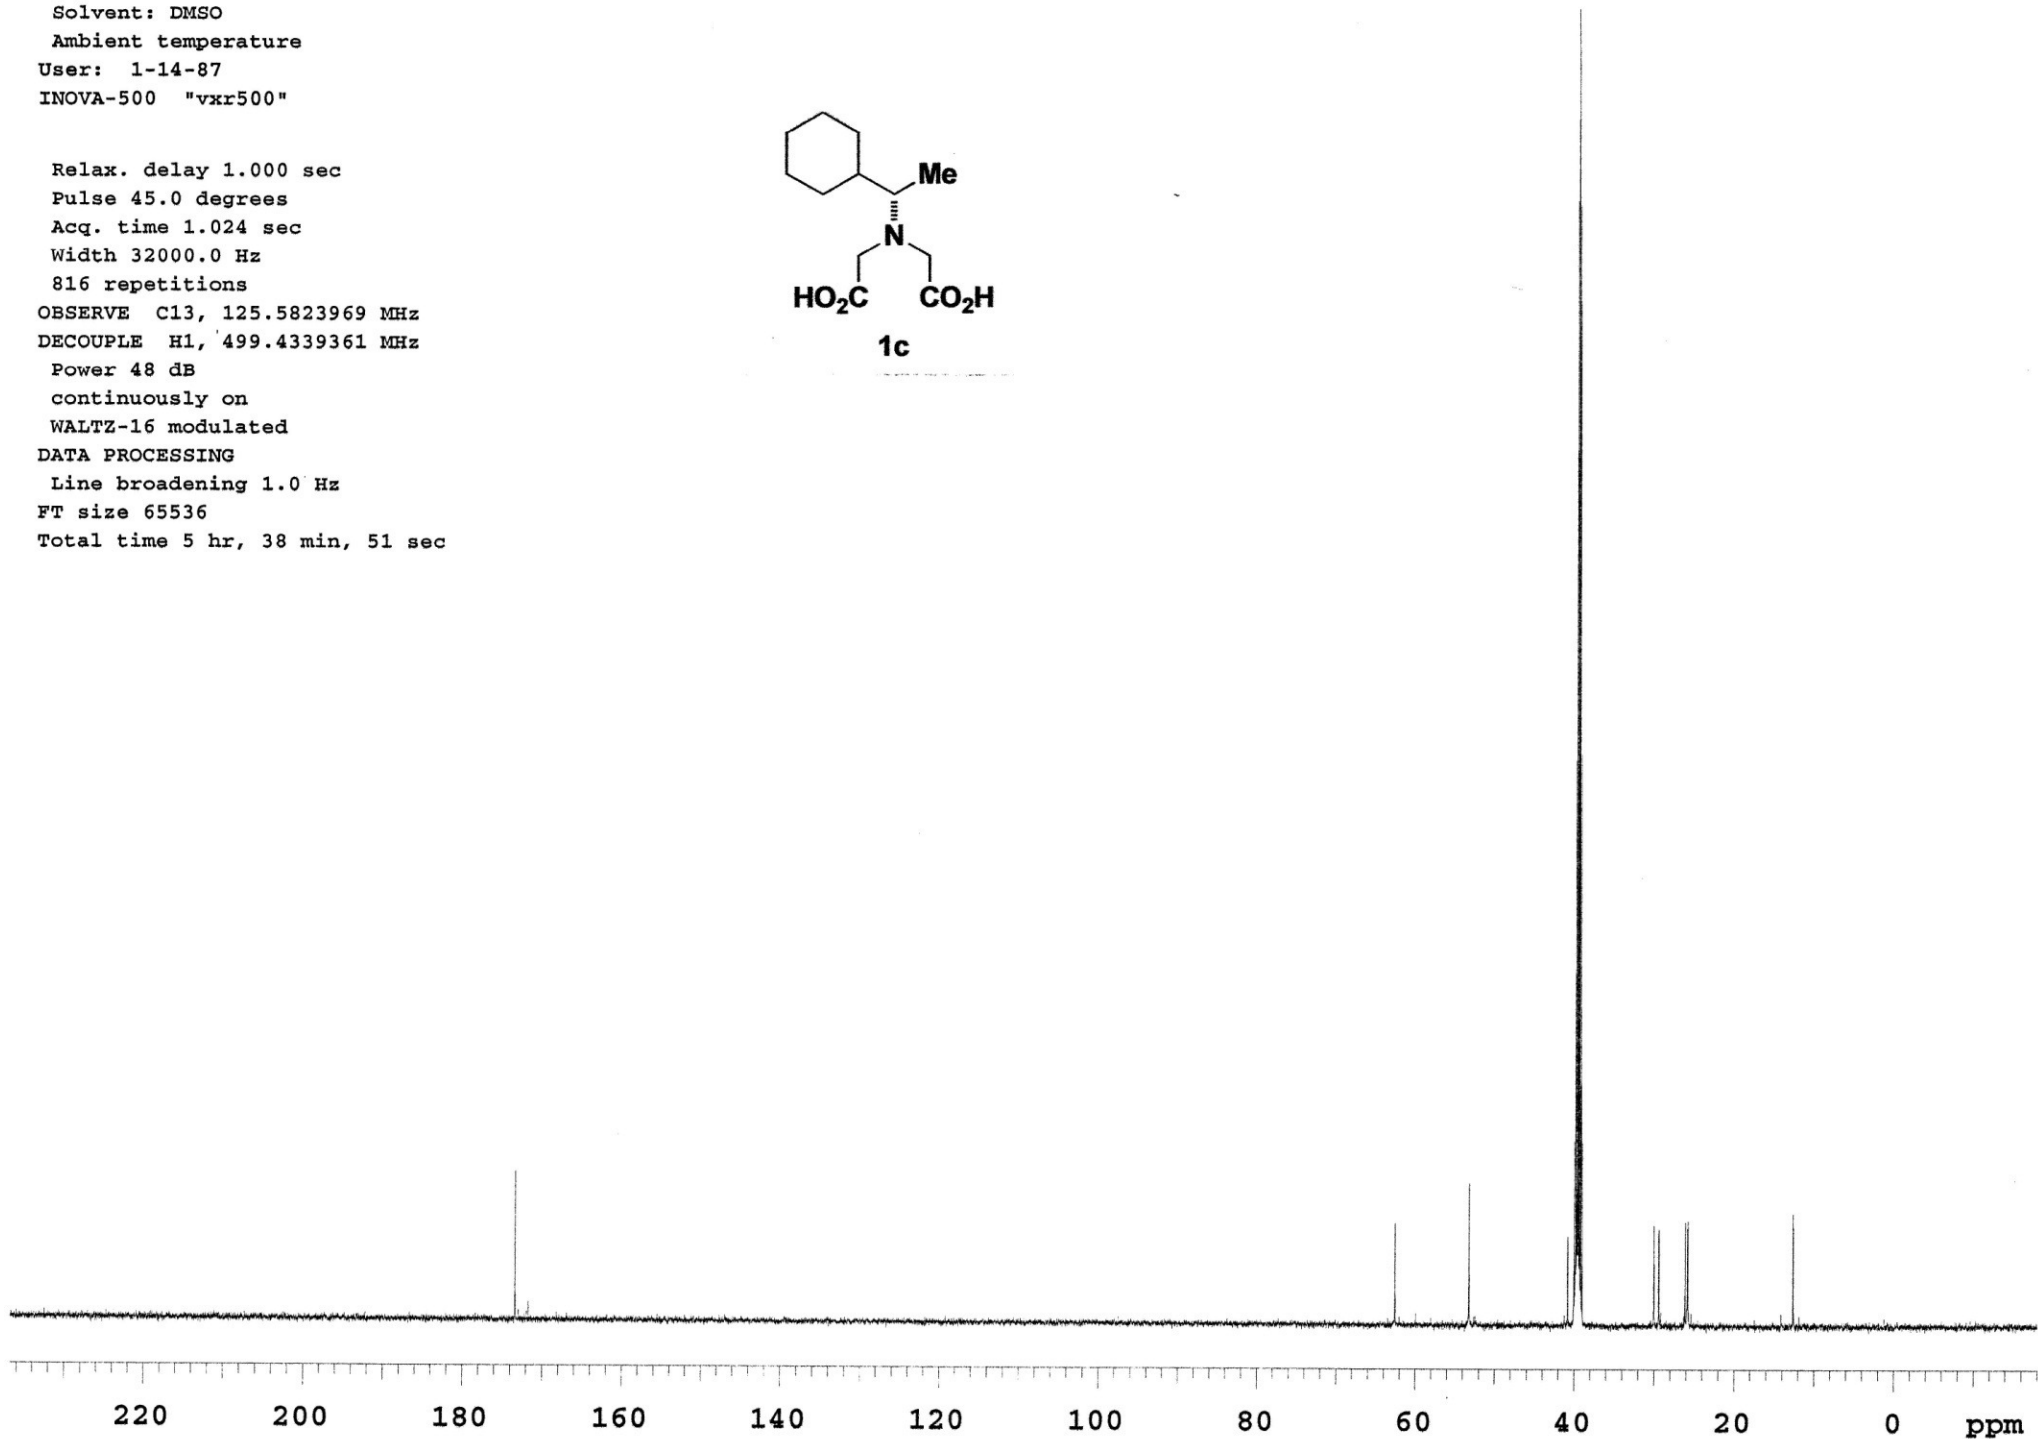

Pulse Sequence: s2pul

Solvent: DMSO  
Ambient temperature  
INOVA-500 "vxr500"

Pulse 45.0 degrees  
Acq. time 4.096 sec  
Width 8000.0 Hz  
8 repetitions  
OBSERVE H1, 499.4322730 MHz  
DATA PROCESSING  
Line broadening 0.3 Hz  
FT size 65536  
Total time 0 min, 32 sec

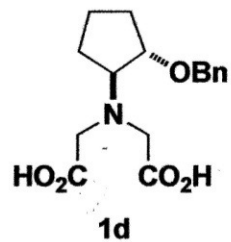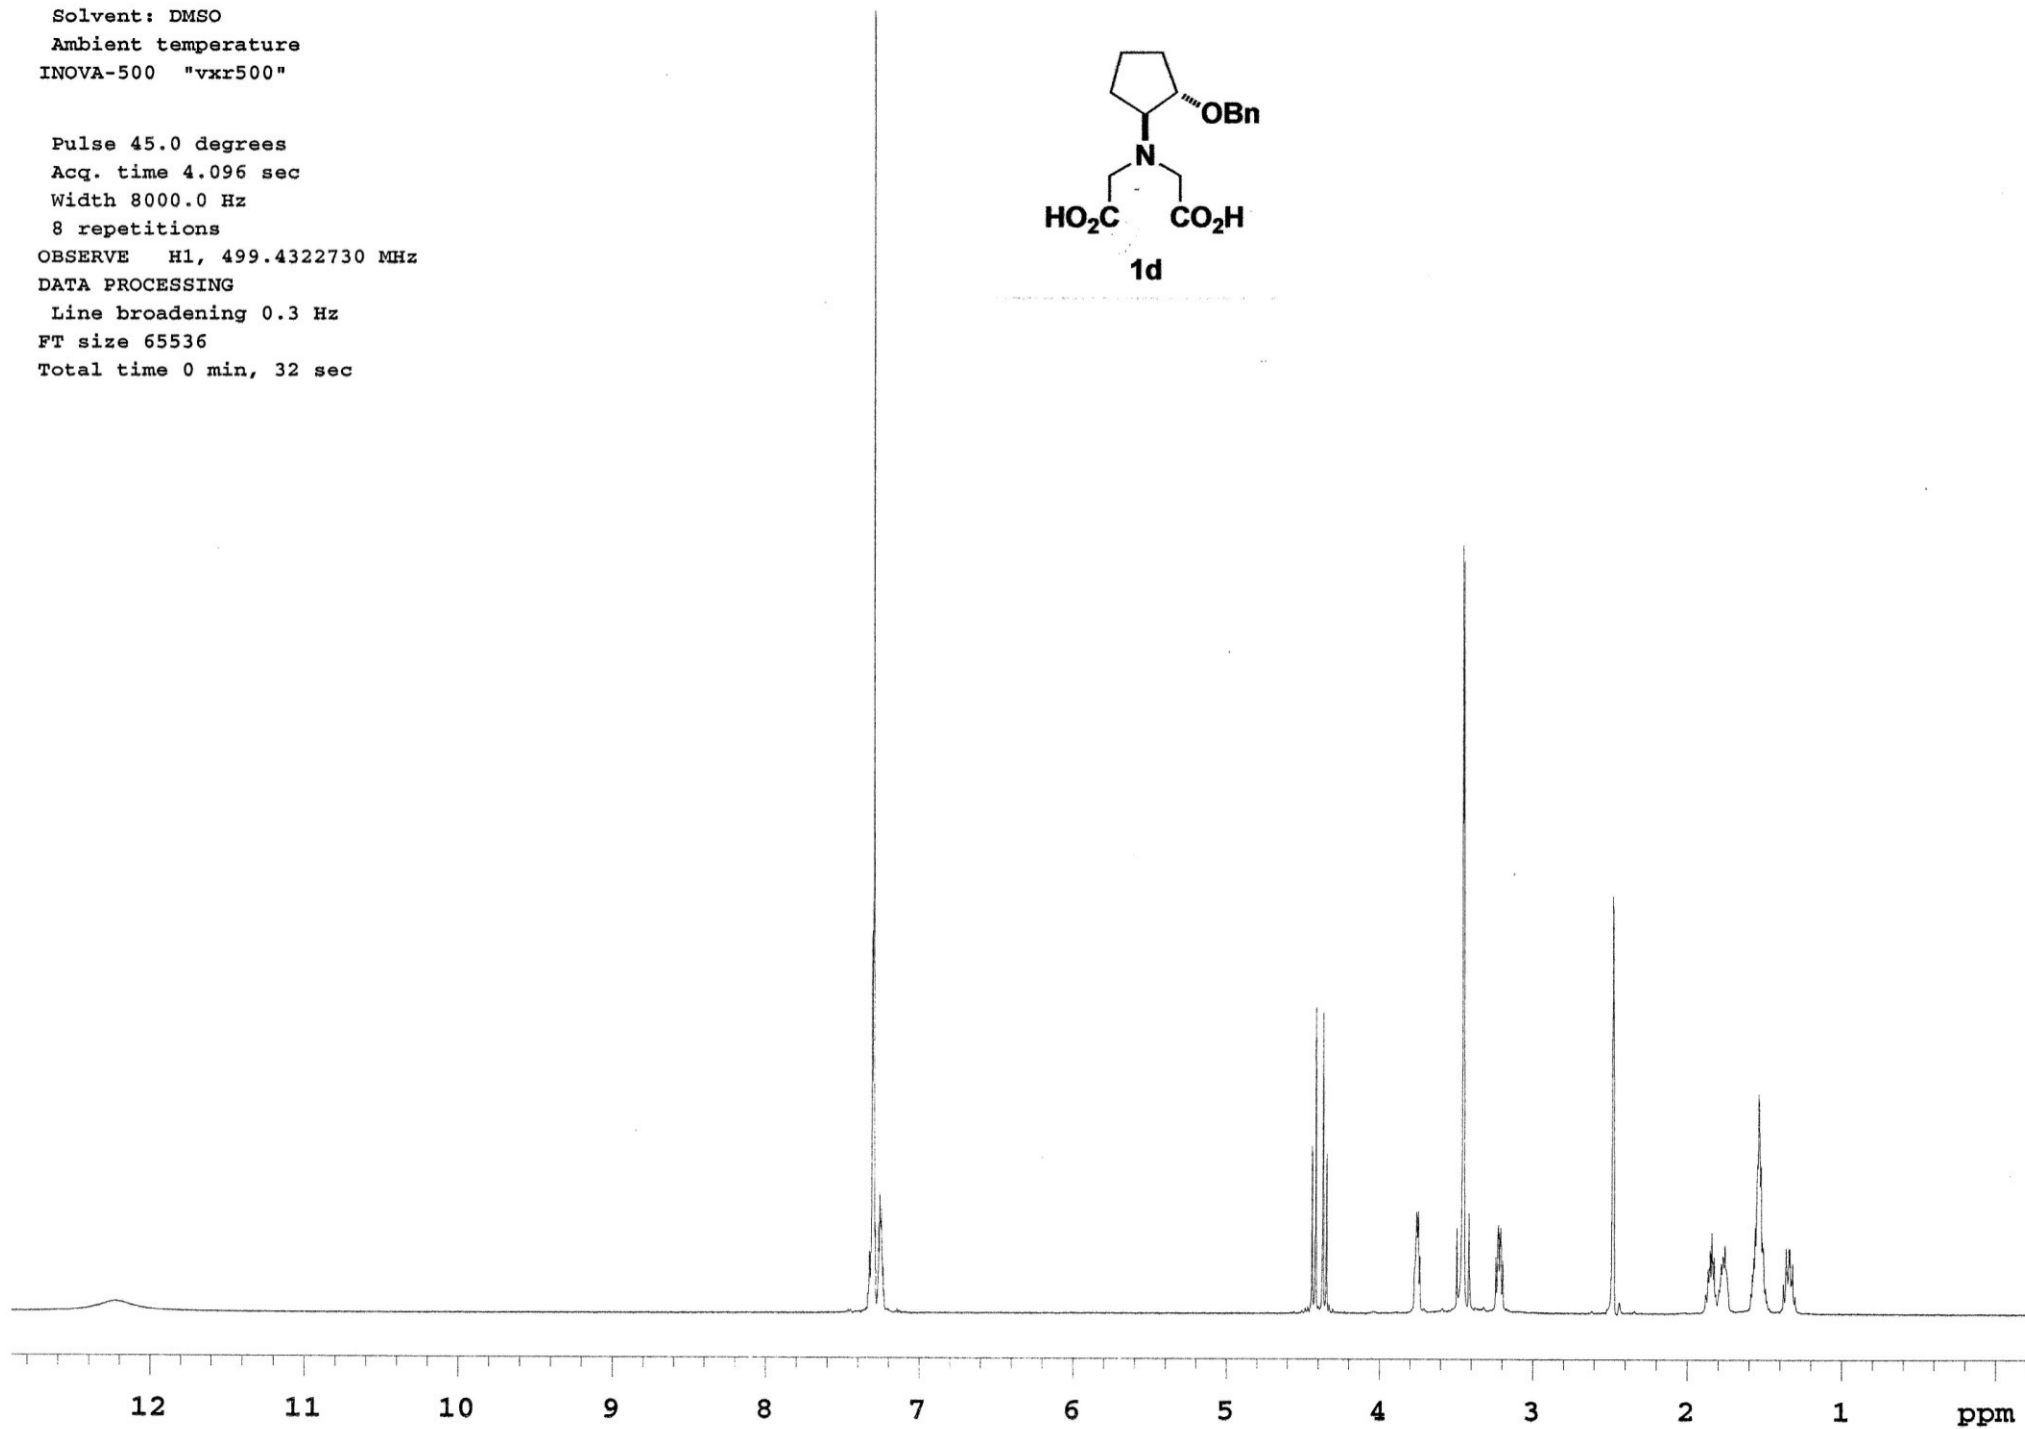

Pulse Sequence: s2pul

Solvent: DMSO  
Ambient temperature  
User: 1-14-87  
INOVA-500 "vvr500"

Relax. delay 1.000 sec  
Pulse 45.0 degrees  
Acq. time 1.024 sec  
Width 32000.0 Hz  
960 repetitions  
OBSERVE C13, 125.5824028 MHz  
DECOUPLE H1, 499.4339361 MHz  
Power 48 dB  
continuously on  
WALTZ-16 modulated  
DATA PROCESSING  
Line broadening 1.0 Hz  
FT size 65536  
Total time 5 hr, 38 min, 51 sec

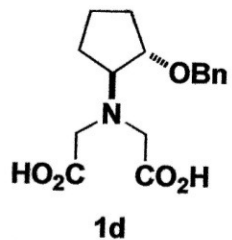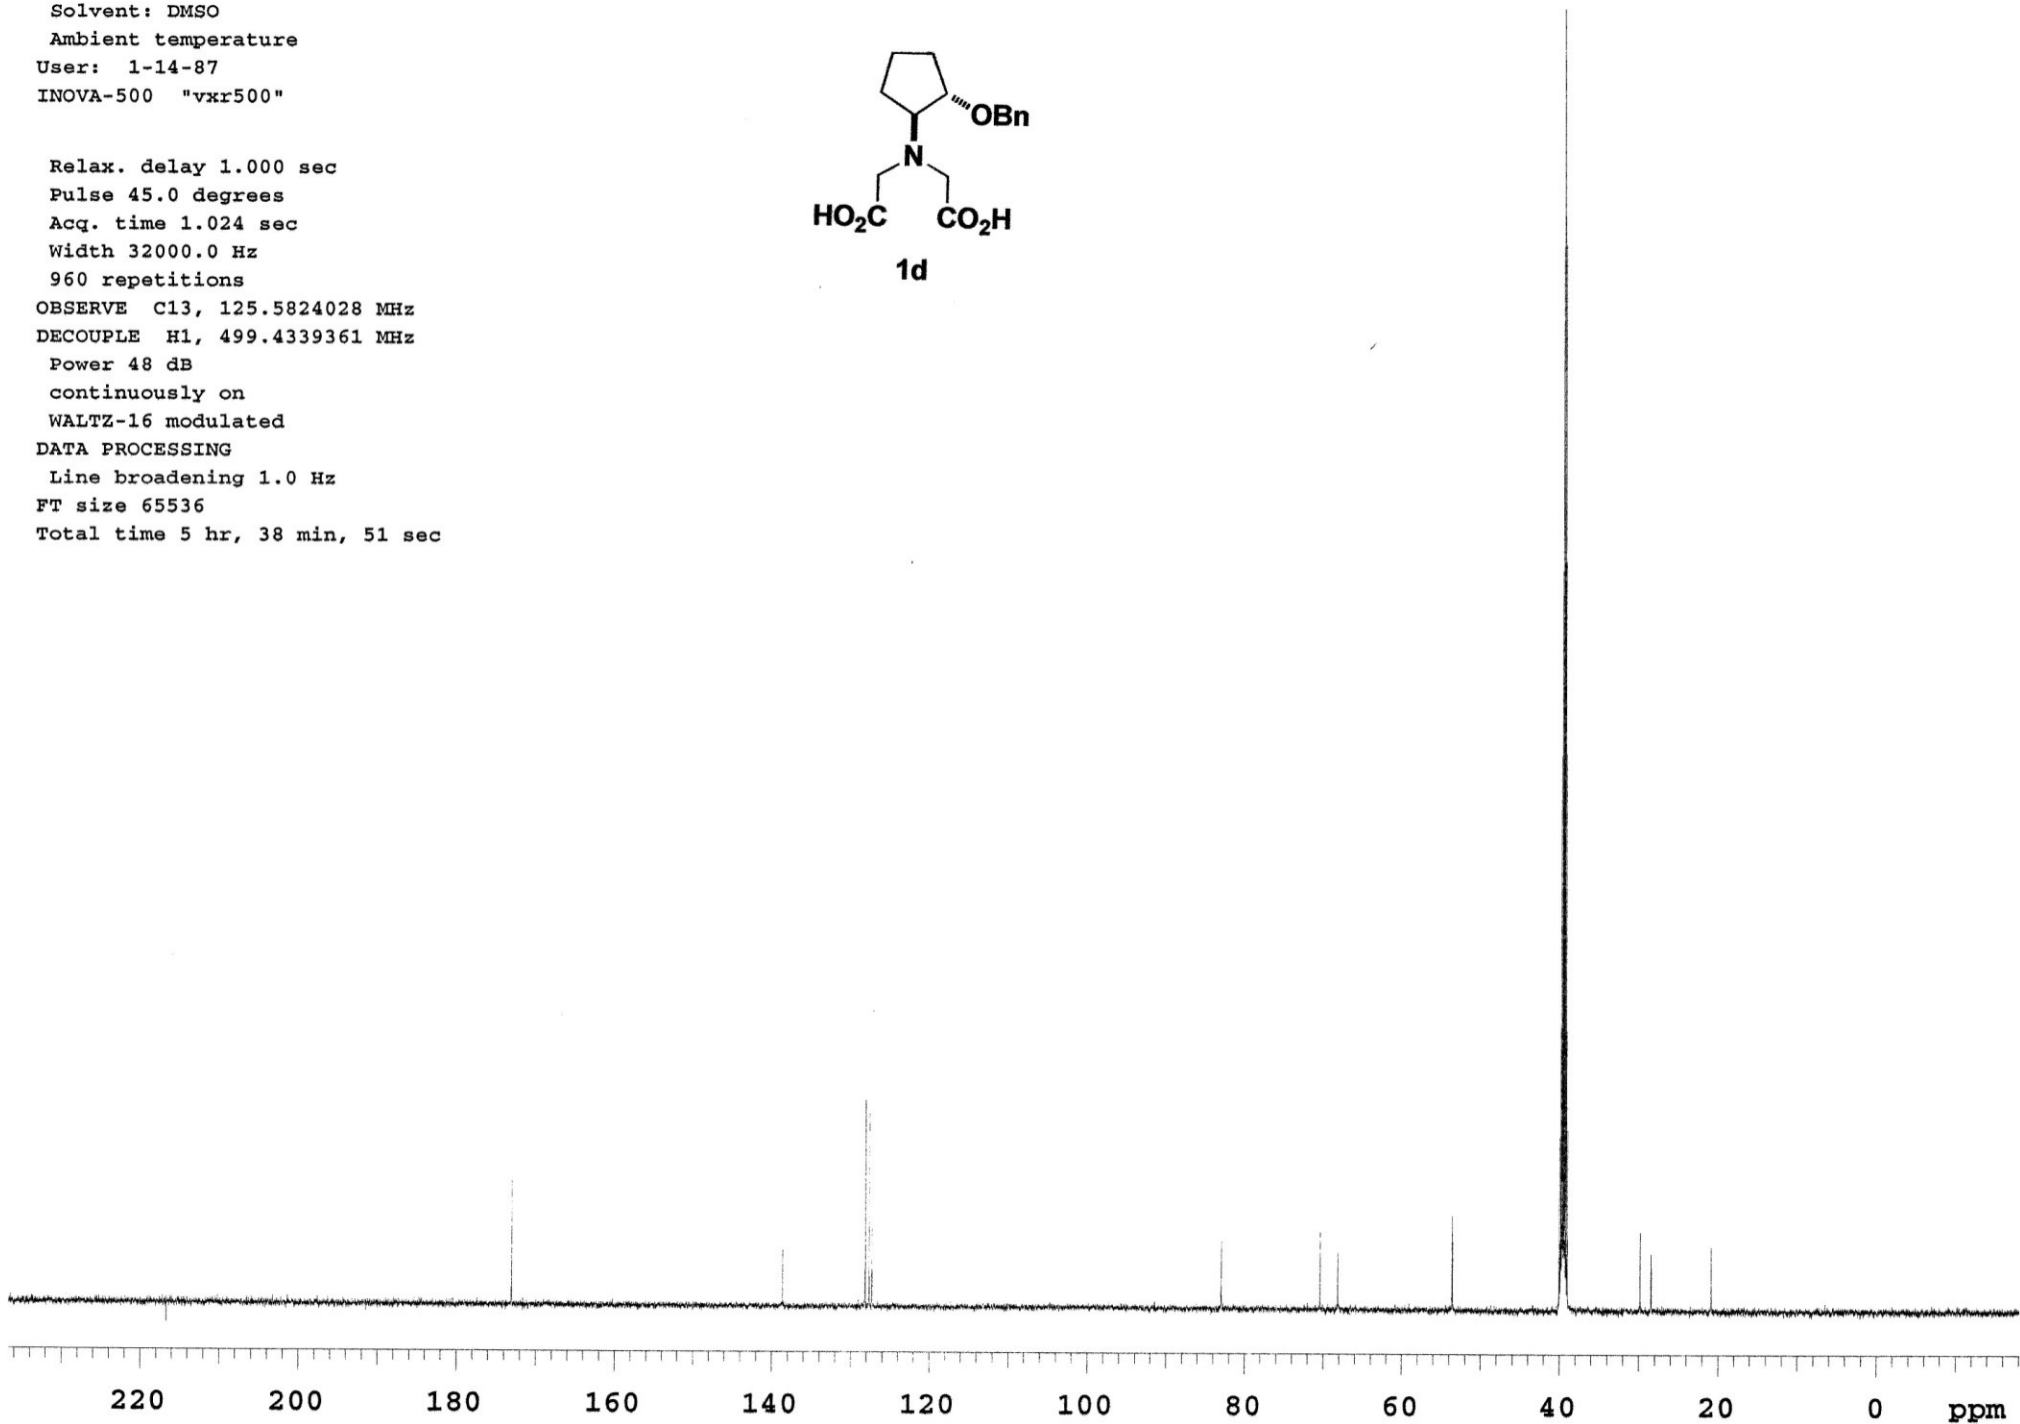

Pulse Sequence: s2pul

Solvent: Acetone  
Ambient temperature  
INOVA-500 "vnr500"

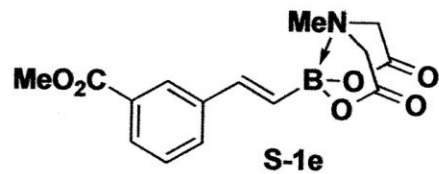

Pulse 45.0 degrees  
Acq. time 4.096 sec  
Width 8000.0 Hz  
Single scan

OBSERVE H1, 499.4324934 MHz

DATA PROCESSING

Line broadening 0.3 Hz

FT size 65536

Total time 0 min, 4 sec

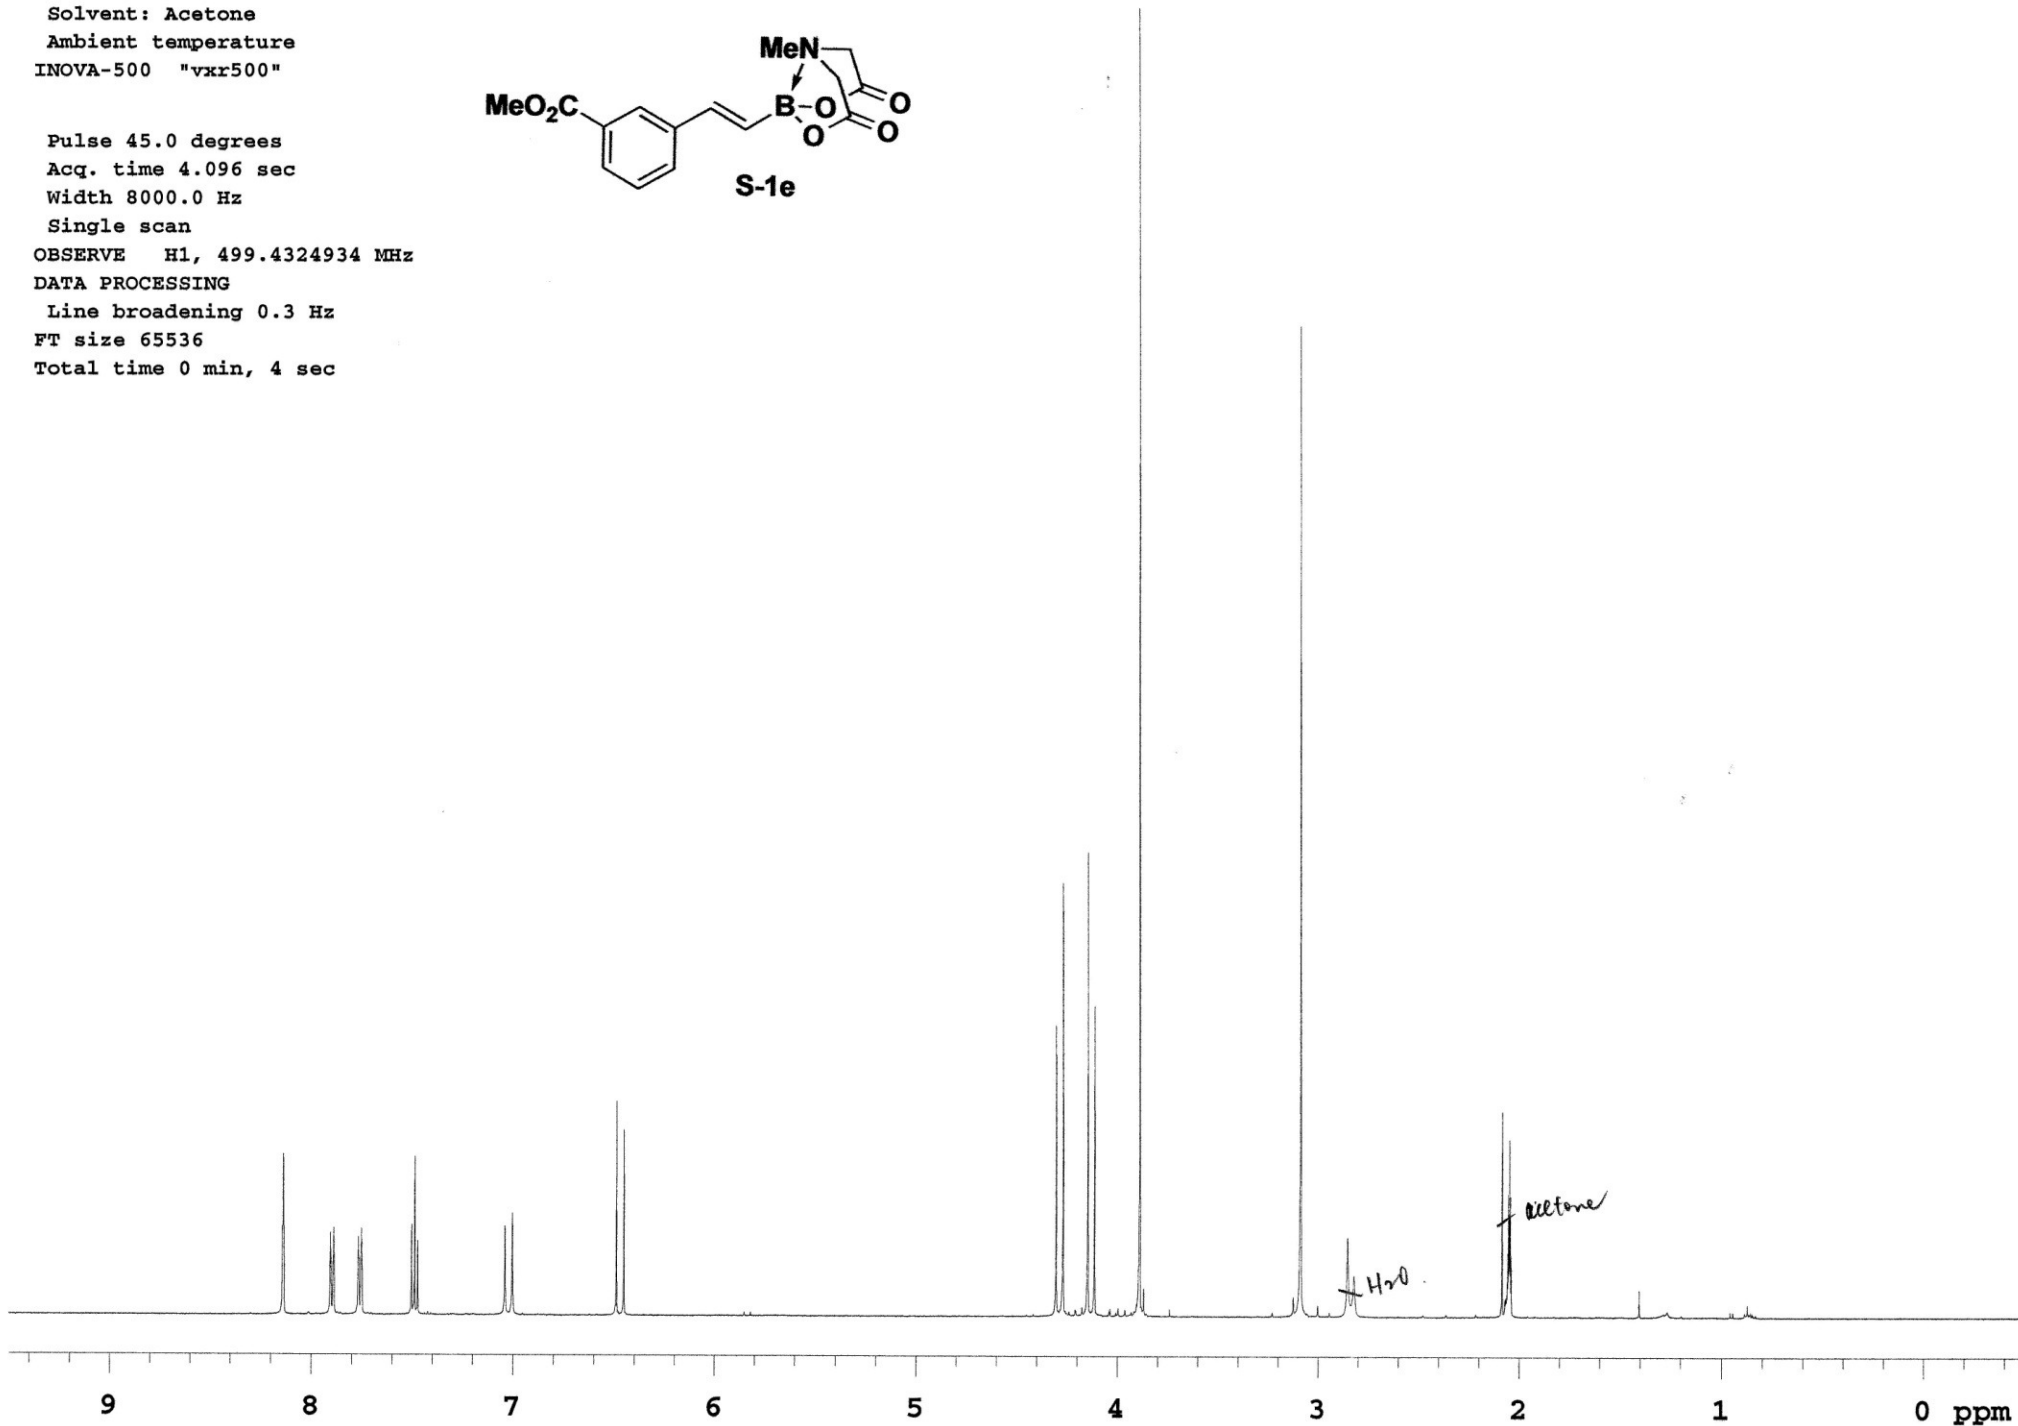

S-62

0 ppm

Pulse Sequence: s2pul

Solvent: Acetone  
Ambient temperature  
User: 1-14-87  
INOVA-500 "vxr500"

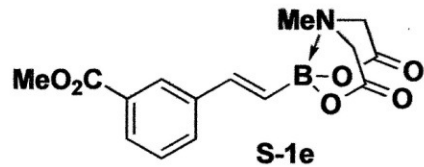

Relax. delay 1.000 sec  
Pulse 45.0 degrees  
Acq. time 1.024 sec  
Width 32000.0 Hz  
224 repetitions  
OBSERVE C13, 125.5823684 MHz  
DECOUPLE H1, 499.4341558 MHz  
Power 44 dB  
continuously on  
WALTZ-16 modulated  
DATA PROCESSING  
Line broadening 1.0 Hz  
FT size 65536  
Total time 33 min, 54 sec

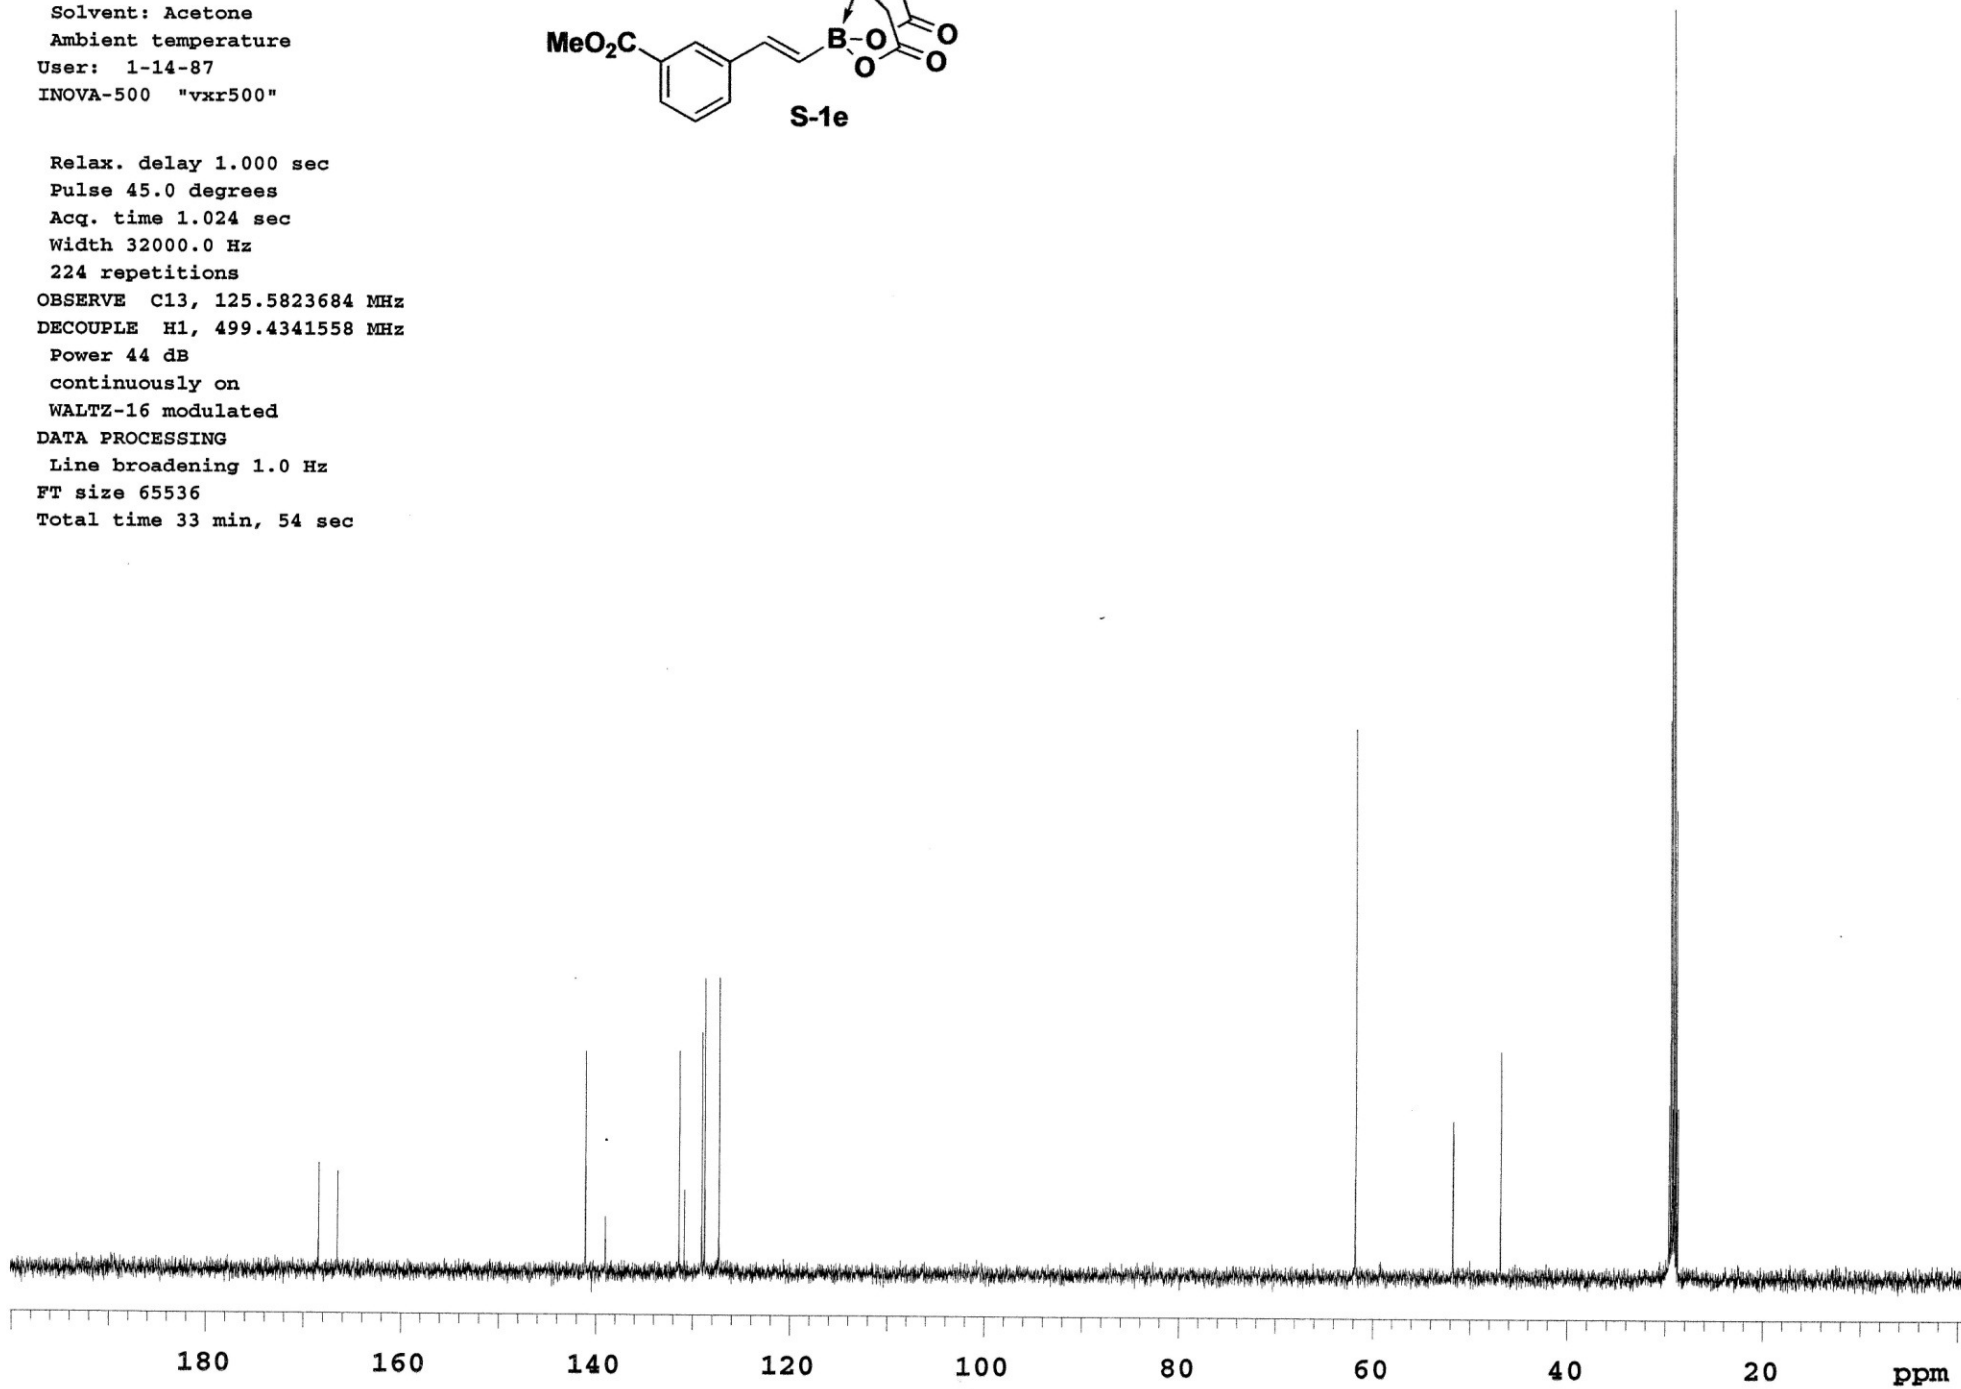

Pulse Sequence: s2pul

Solvent: Acetone  
Ambient temperature  
INNOVA-500 "vkr500"

Pulse 45.0 degrees  
Acq. time 4.096 sec  
Width 8000.0 Hz  
4 repetitions  
OBSERVE H1, 499.4324934 MHz  
DATA PROCESSING  
Line broadening 0.3 Hz  
FT size 65536  
Total time 0 min, 16 sec

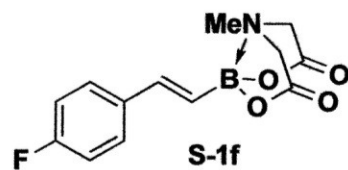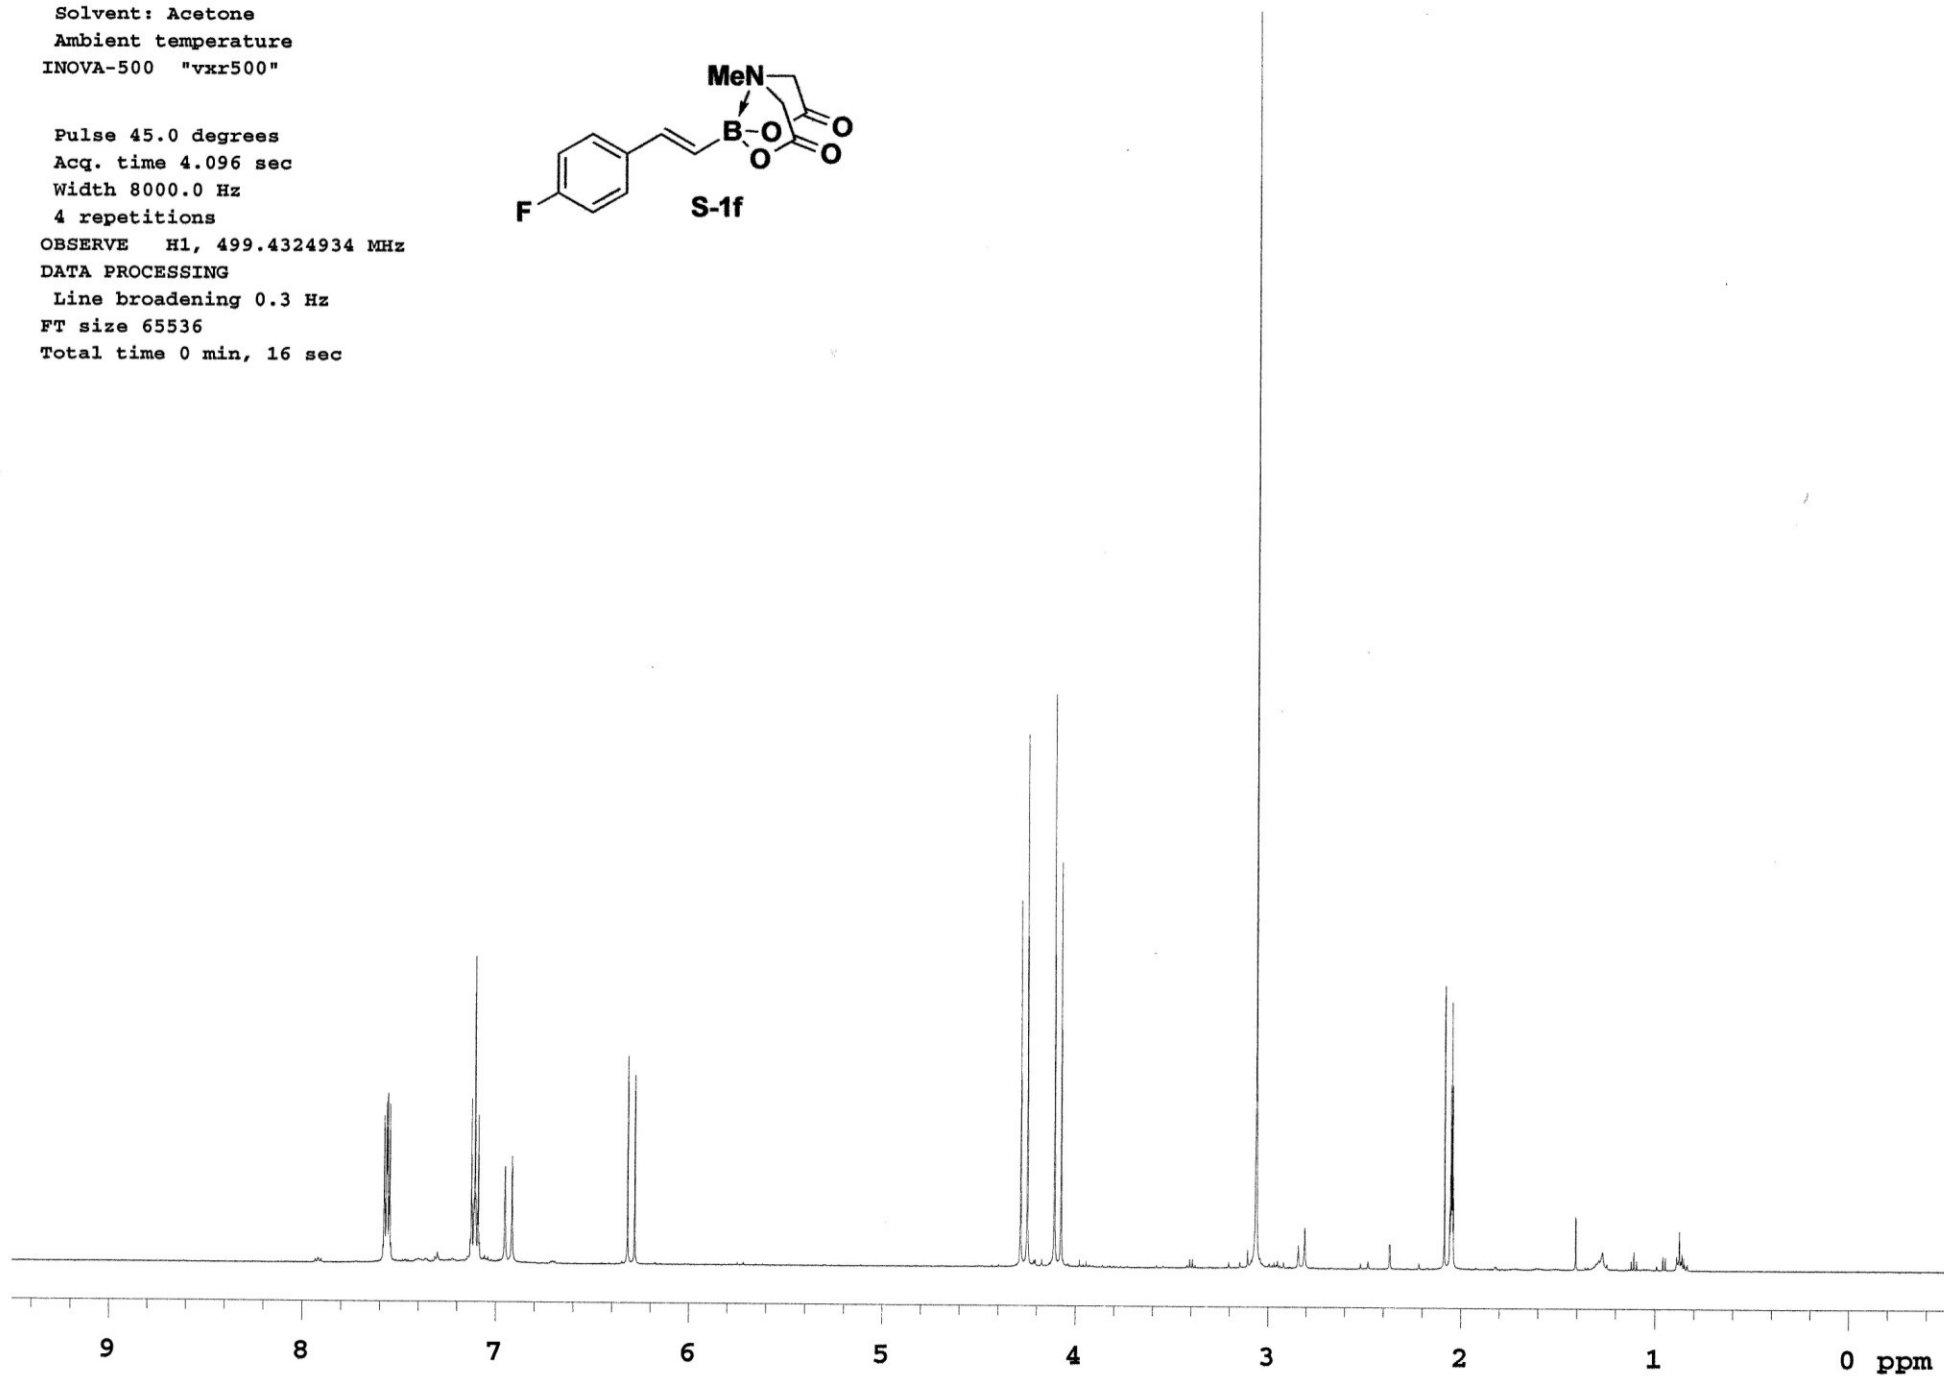



Pulse Sequence: s2pul

Solvent: Acetone  
Ambient temperature  
User: 1-14-87  
INOVA-500 "vvr500"

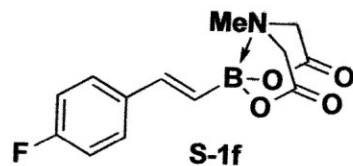

Relax. delay 1.000 sec  
Pulse 45.0 degrees  
Acq. time 1.024 sec  
Width 32000.0 Hz  
208 repetitions  
OBSERVE C13, 125.5822943 MHz  
DECOUPLE H1, 499.4341558 MHz  
Power 44 dB  
continuously on  
WALTZ-16 modulated  
DATA PROCESSING  
Line broadening 1.0 Hz  
FT size 65536  
Total time 33 min, 54 sec

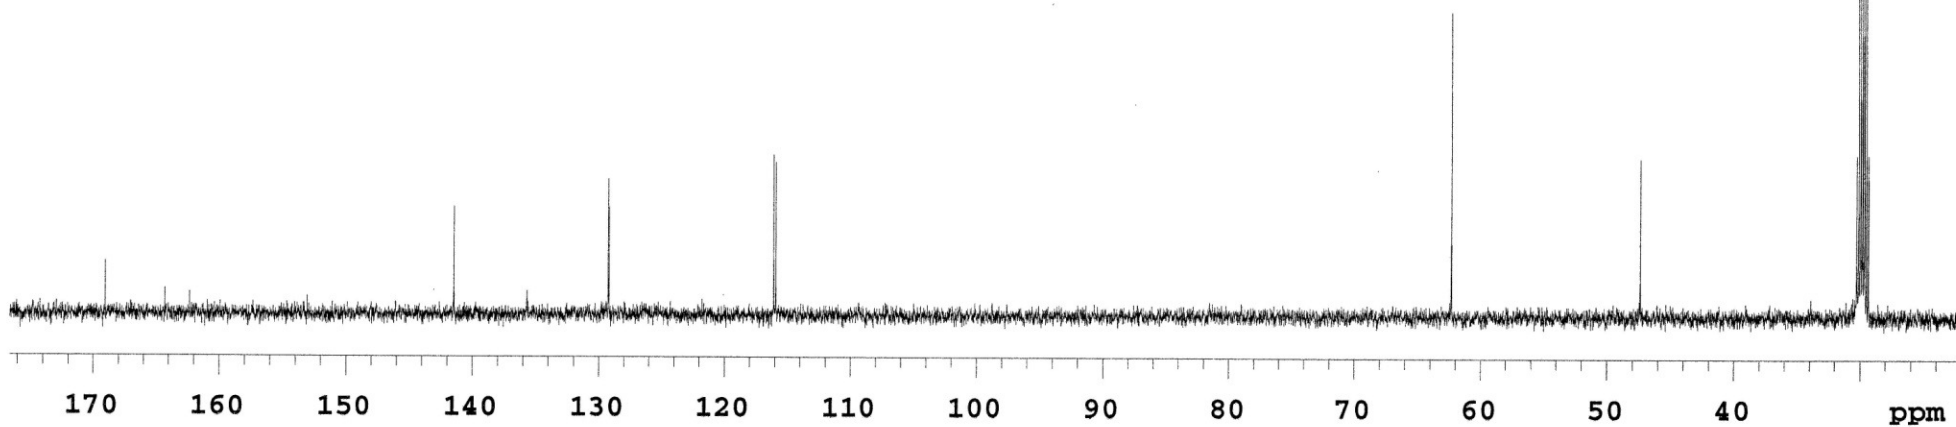

Pulse Sequence: s2pul

Solvent: CDCl3

Ambient temperature

File: 060811\_JL\_2a

INOVA-500 "sunds1"

Relax. delay 10.000 sec

Pulse 61.6 degrees

Acq. time 4.665 sec

Width 7024.9 Hz

Single scan

OBSERVE H1, 499.6906574 MHz

DATA PROCESSING

Line broadening 0.3 Hz

FT size 65536

Total time 0 min, 14 sec

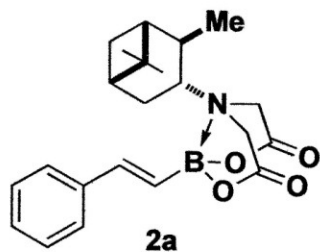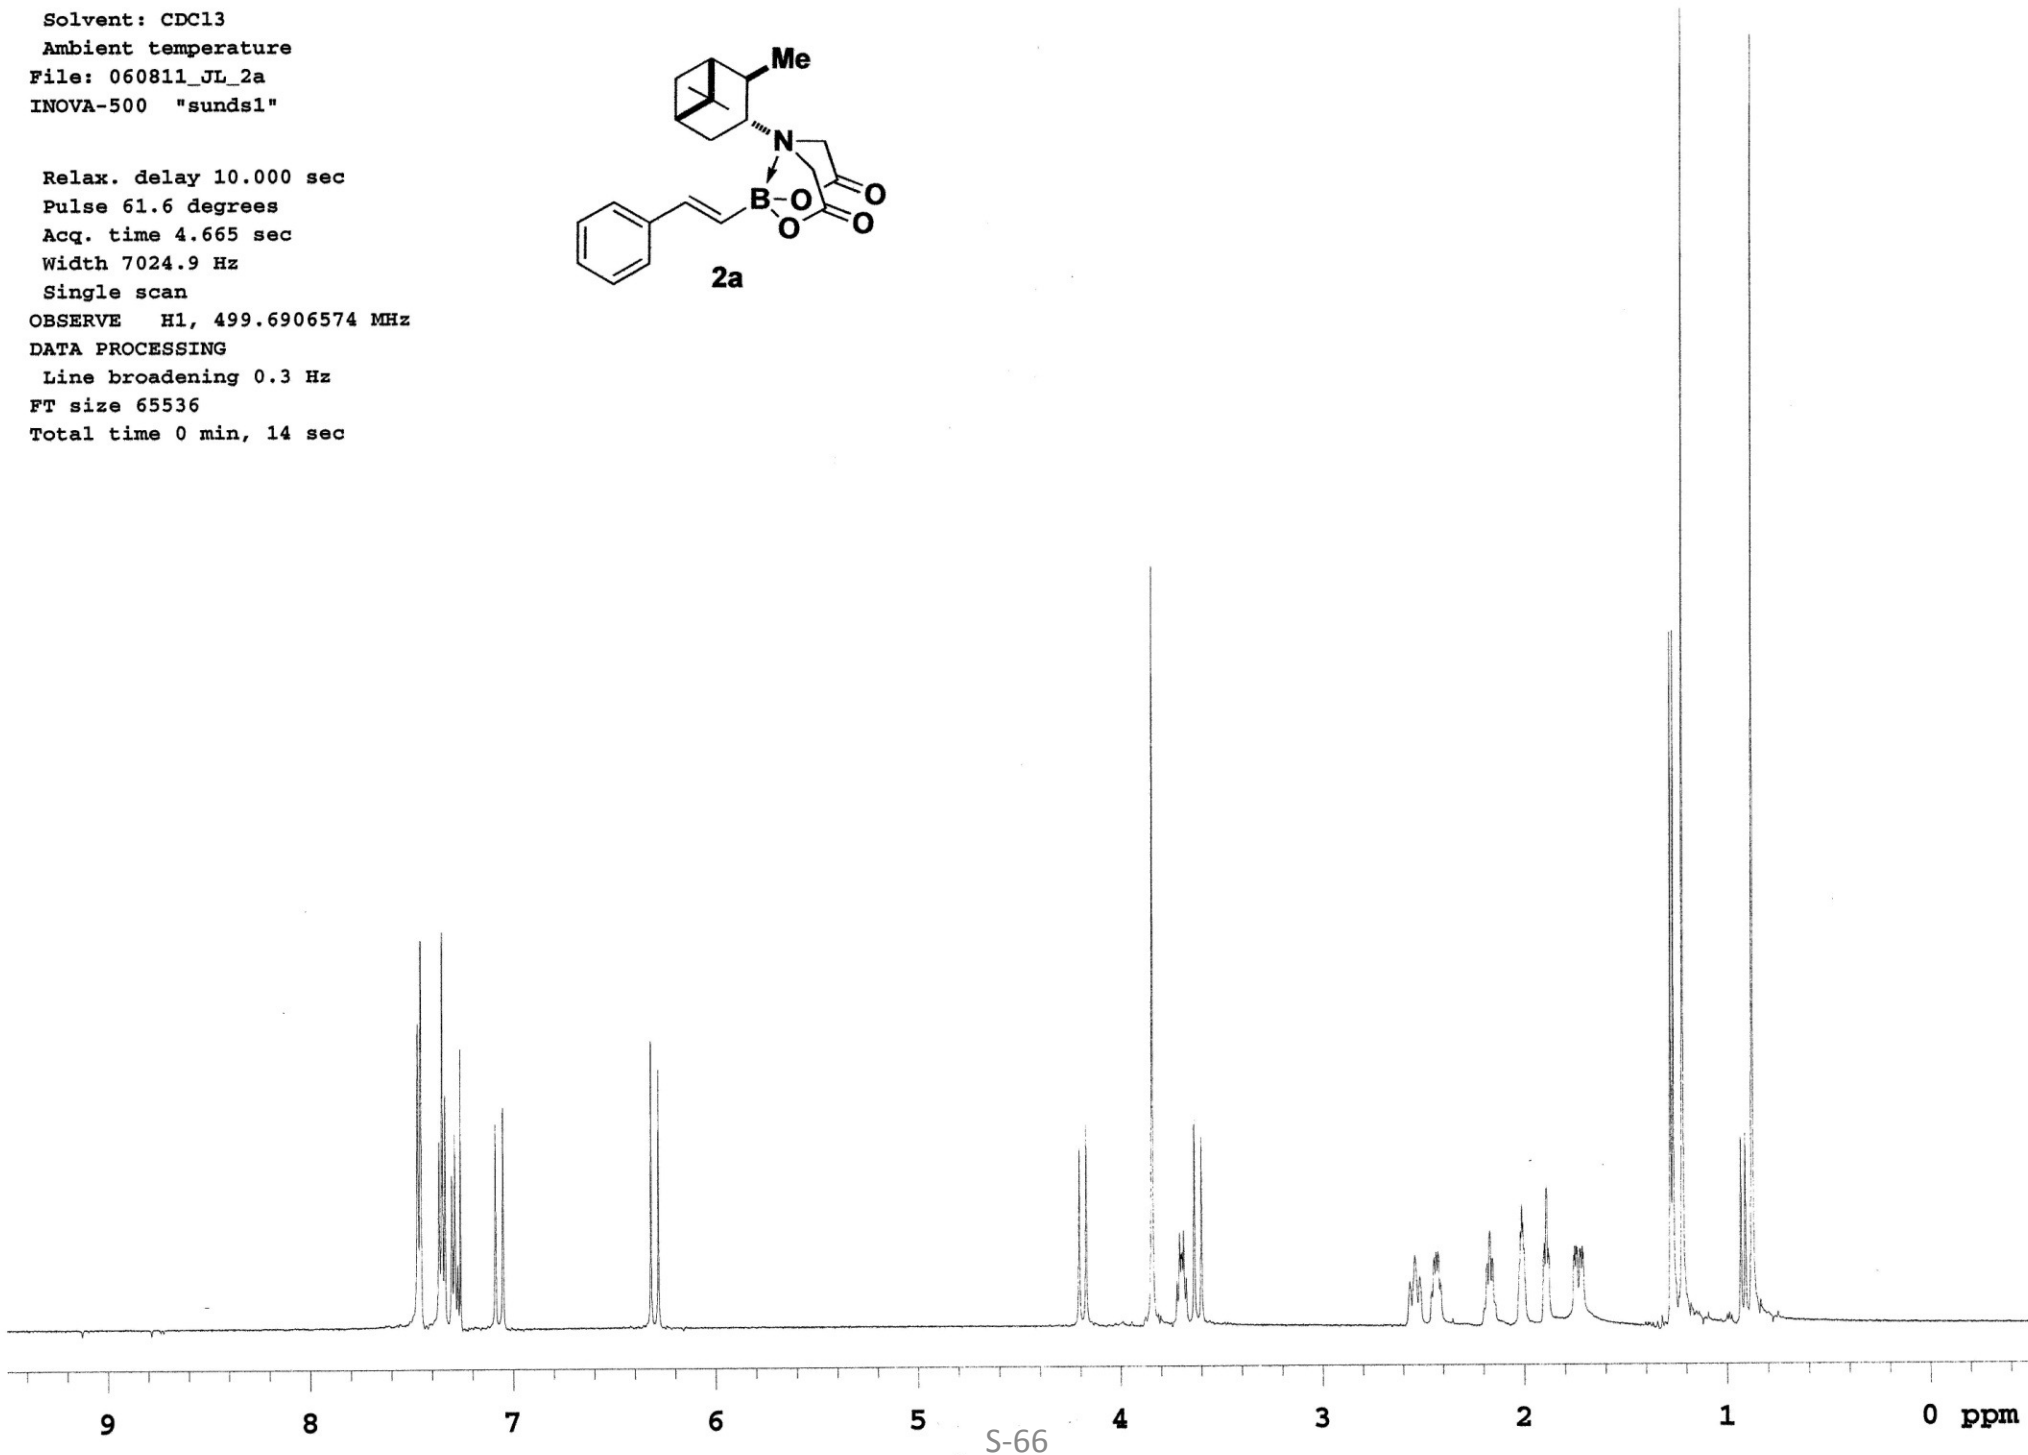

Pulse Sequence: s2pul

Solvent: CDC13

Ambient temperature

User: 1-14-87

INNOVA-500 "u500"

Relax. delay 1.000 sec

Pulse 42.4 degrees

Acq. time 1.086 sec

Width 30165.9 Hz

160 repetitions

OBSERVE C13, 125.6473184 MHz

DECOUPLE H1, 499.6923275 MHz

Power 44 dB

continuously on

WALTZ-16 modulated

DATA PROCESSING

Line broadening 1.0 Hz

FT size 65536

Total time 34 min, 57 sec

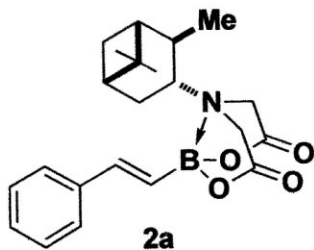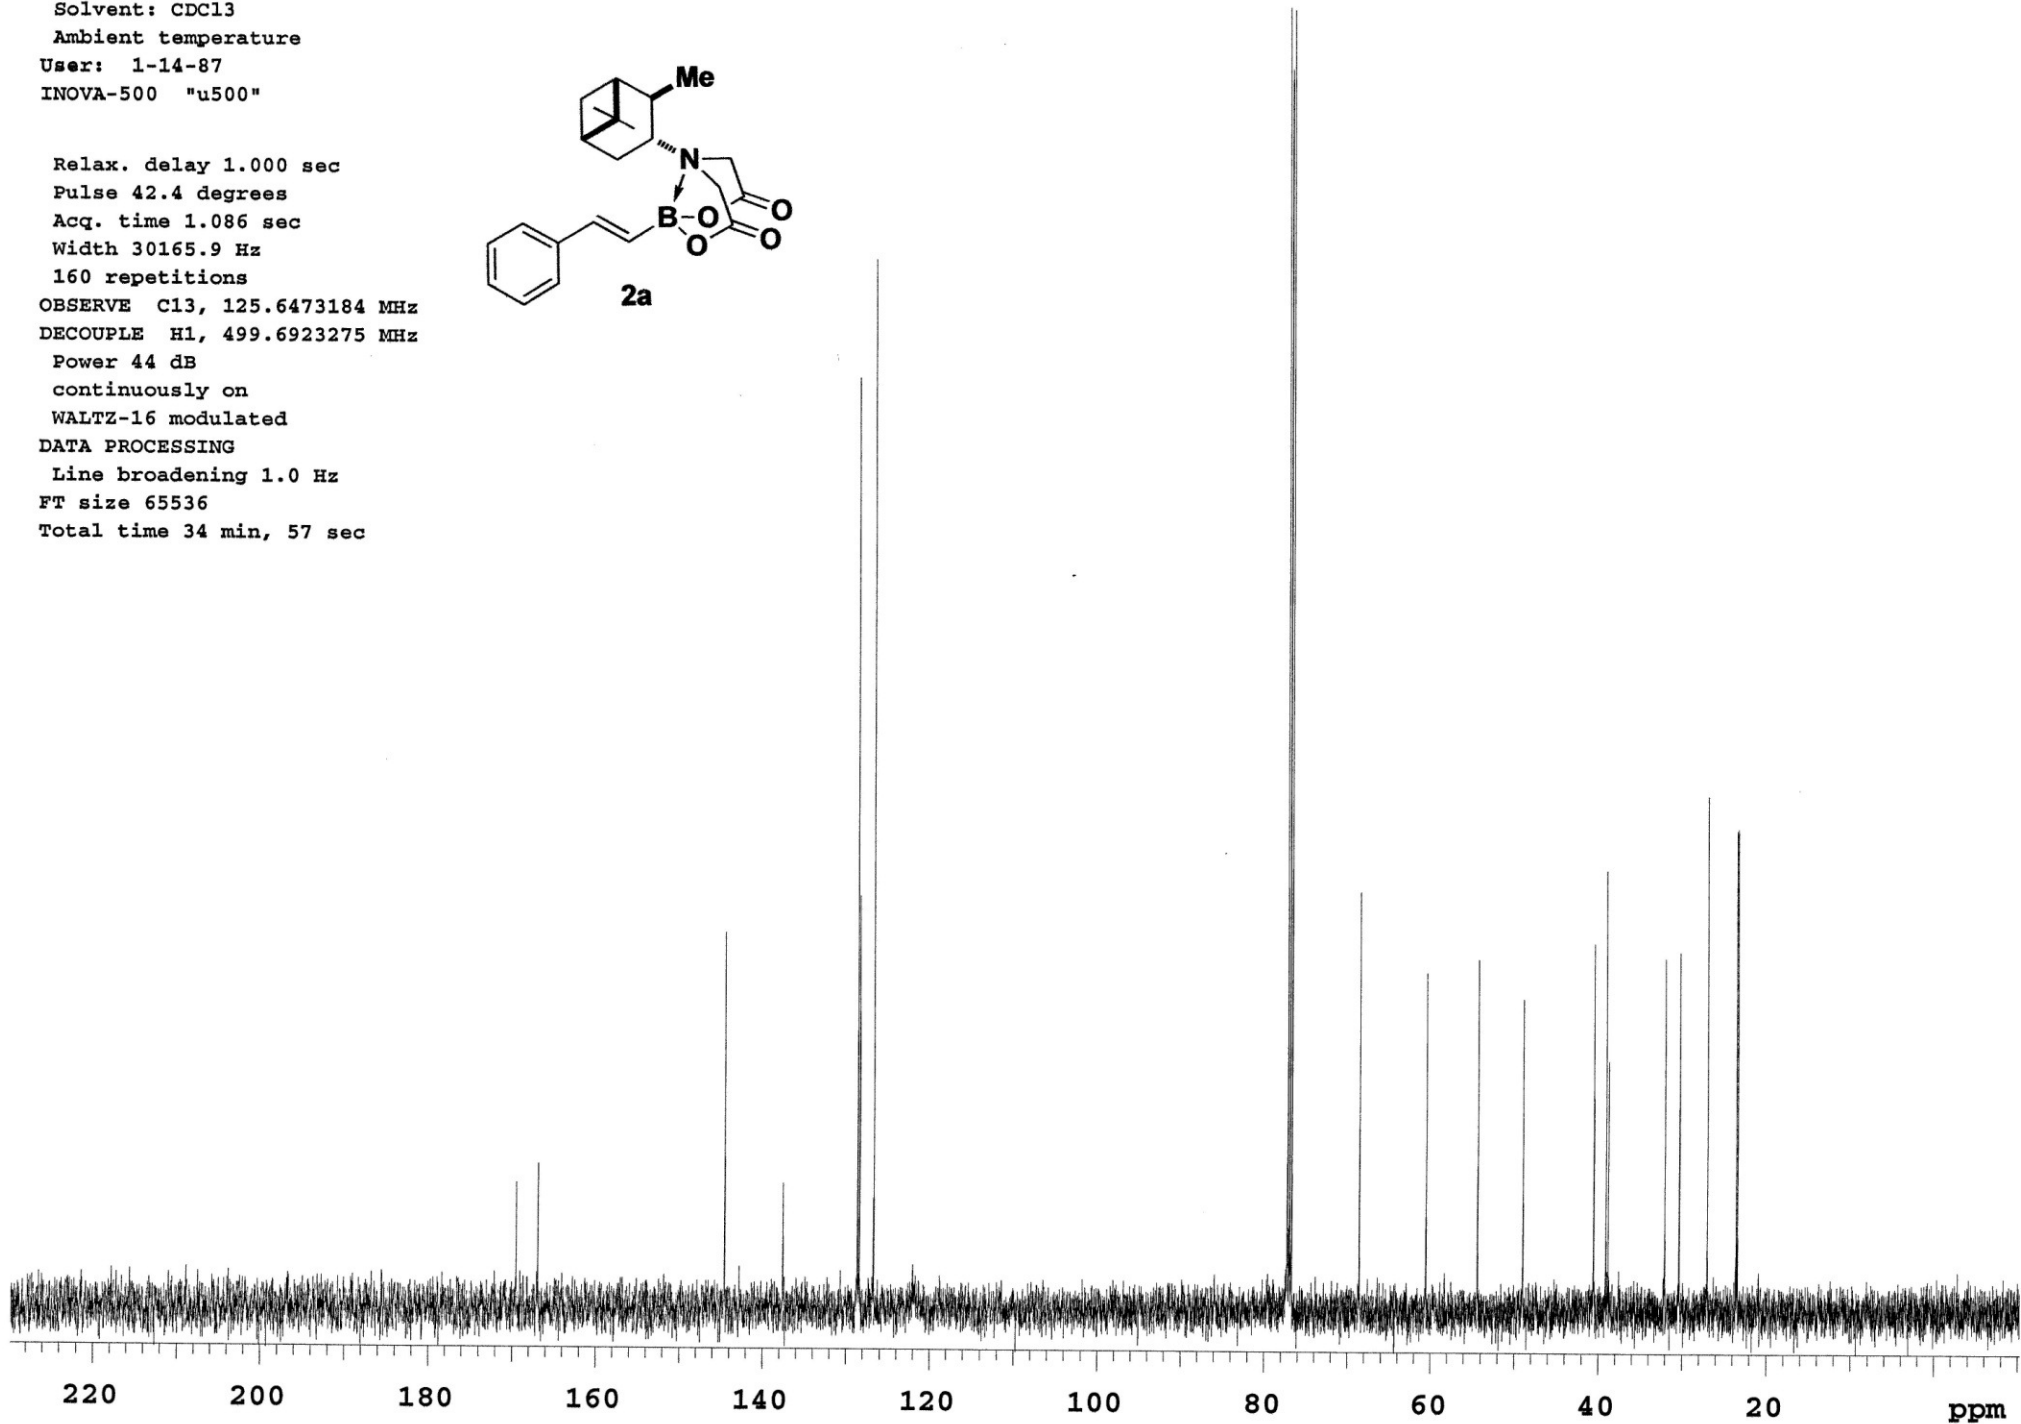

Pulse Sequence: s2pul

Solvent: Acetone

Ambient temperature

File: 011711\_JL\_199A

INOVA-500 "sunds1"

Pulse 45.0 degrees

Acq. time 4.096 sec

Width 8000.0 Hz

4 repetitions

OBSERVE H1, 499.4324929 MHz

DATA PROCESSING

Line broadening 0.3 Hz

FT size 65536

Total time 0 min, 16 sec

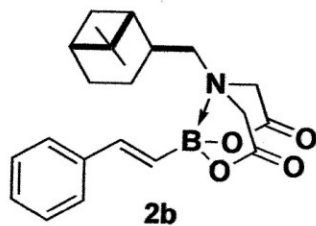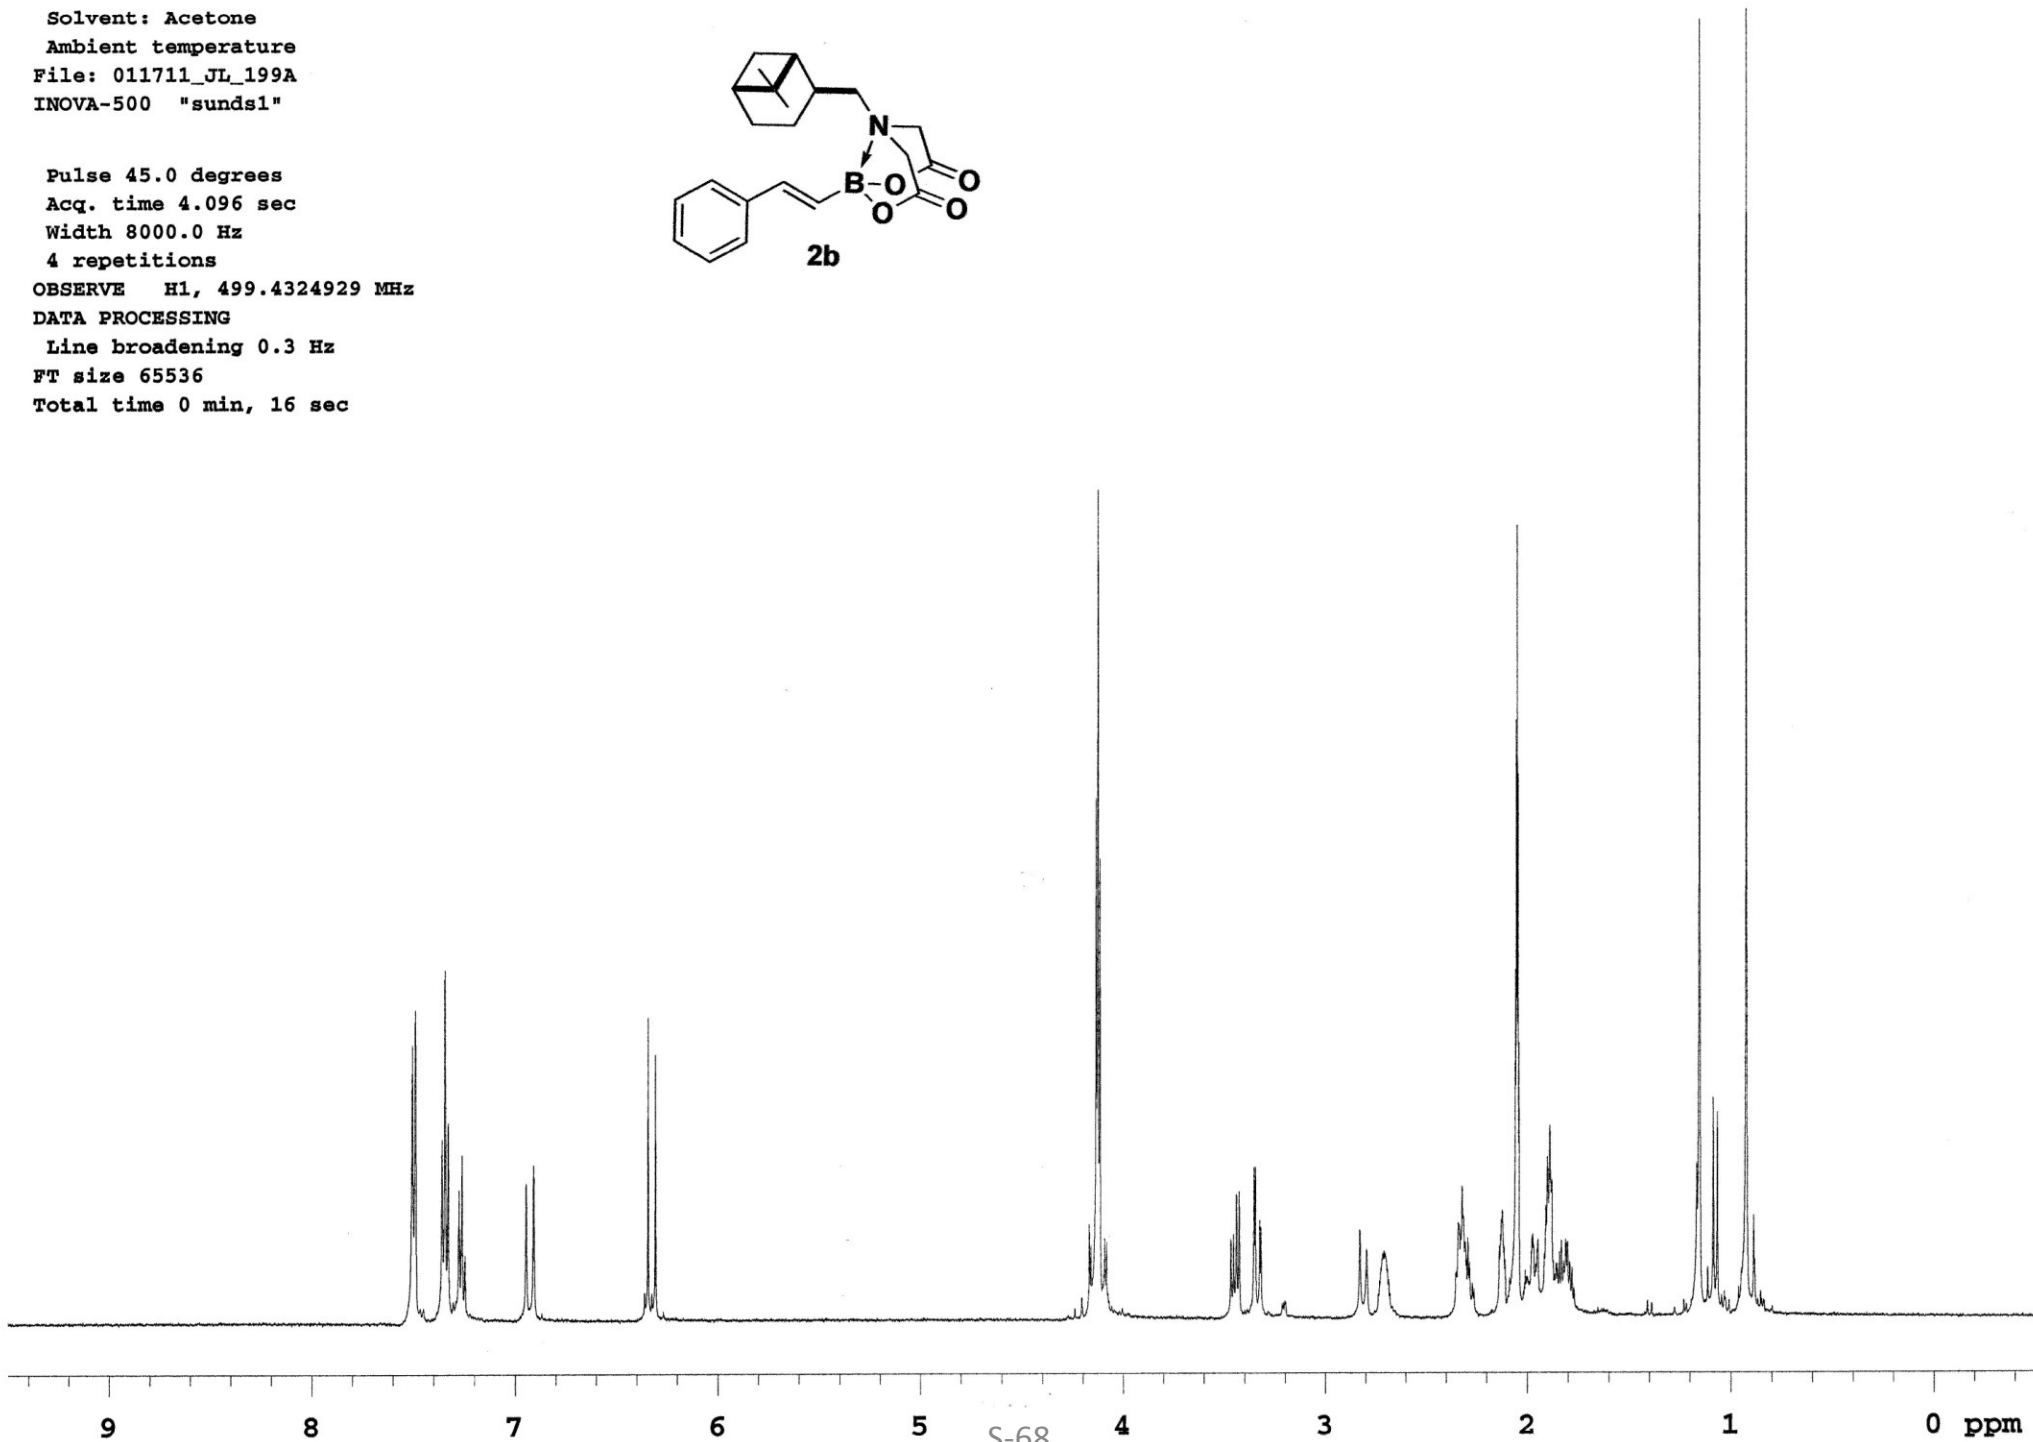

Pulse Sequence: s2pul

Solvent: CDCl3  
Temp. 25.0 C / 298.1 K  
User: 1-14-87  
File: C13\_011911\_JL\_199A  
INOVA-500 "sunds1"

Relax. delay 1.000 sec  
Pulse 45.0 degrees  
Acq. time 1.024 sec  
Width 32000.0 Hz  
512 repetitions  
OBSERVE C13, 125.5817492 MHz  
DECOUPLE H1, 499.4315638 MHz  
Power 48 dB  
continuously on  
WALTZ-16 modulated  
DATA PROCESSING  
Line broadening 1.0 Hz  
FT size 65536  
Total time 5 hr, 38 min, 51 sec

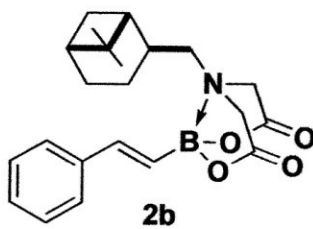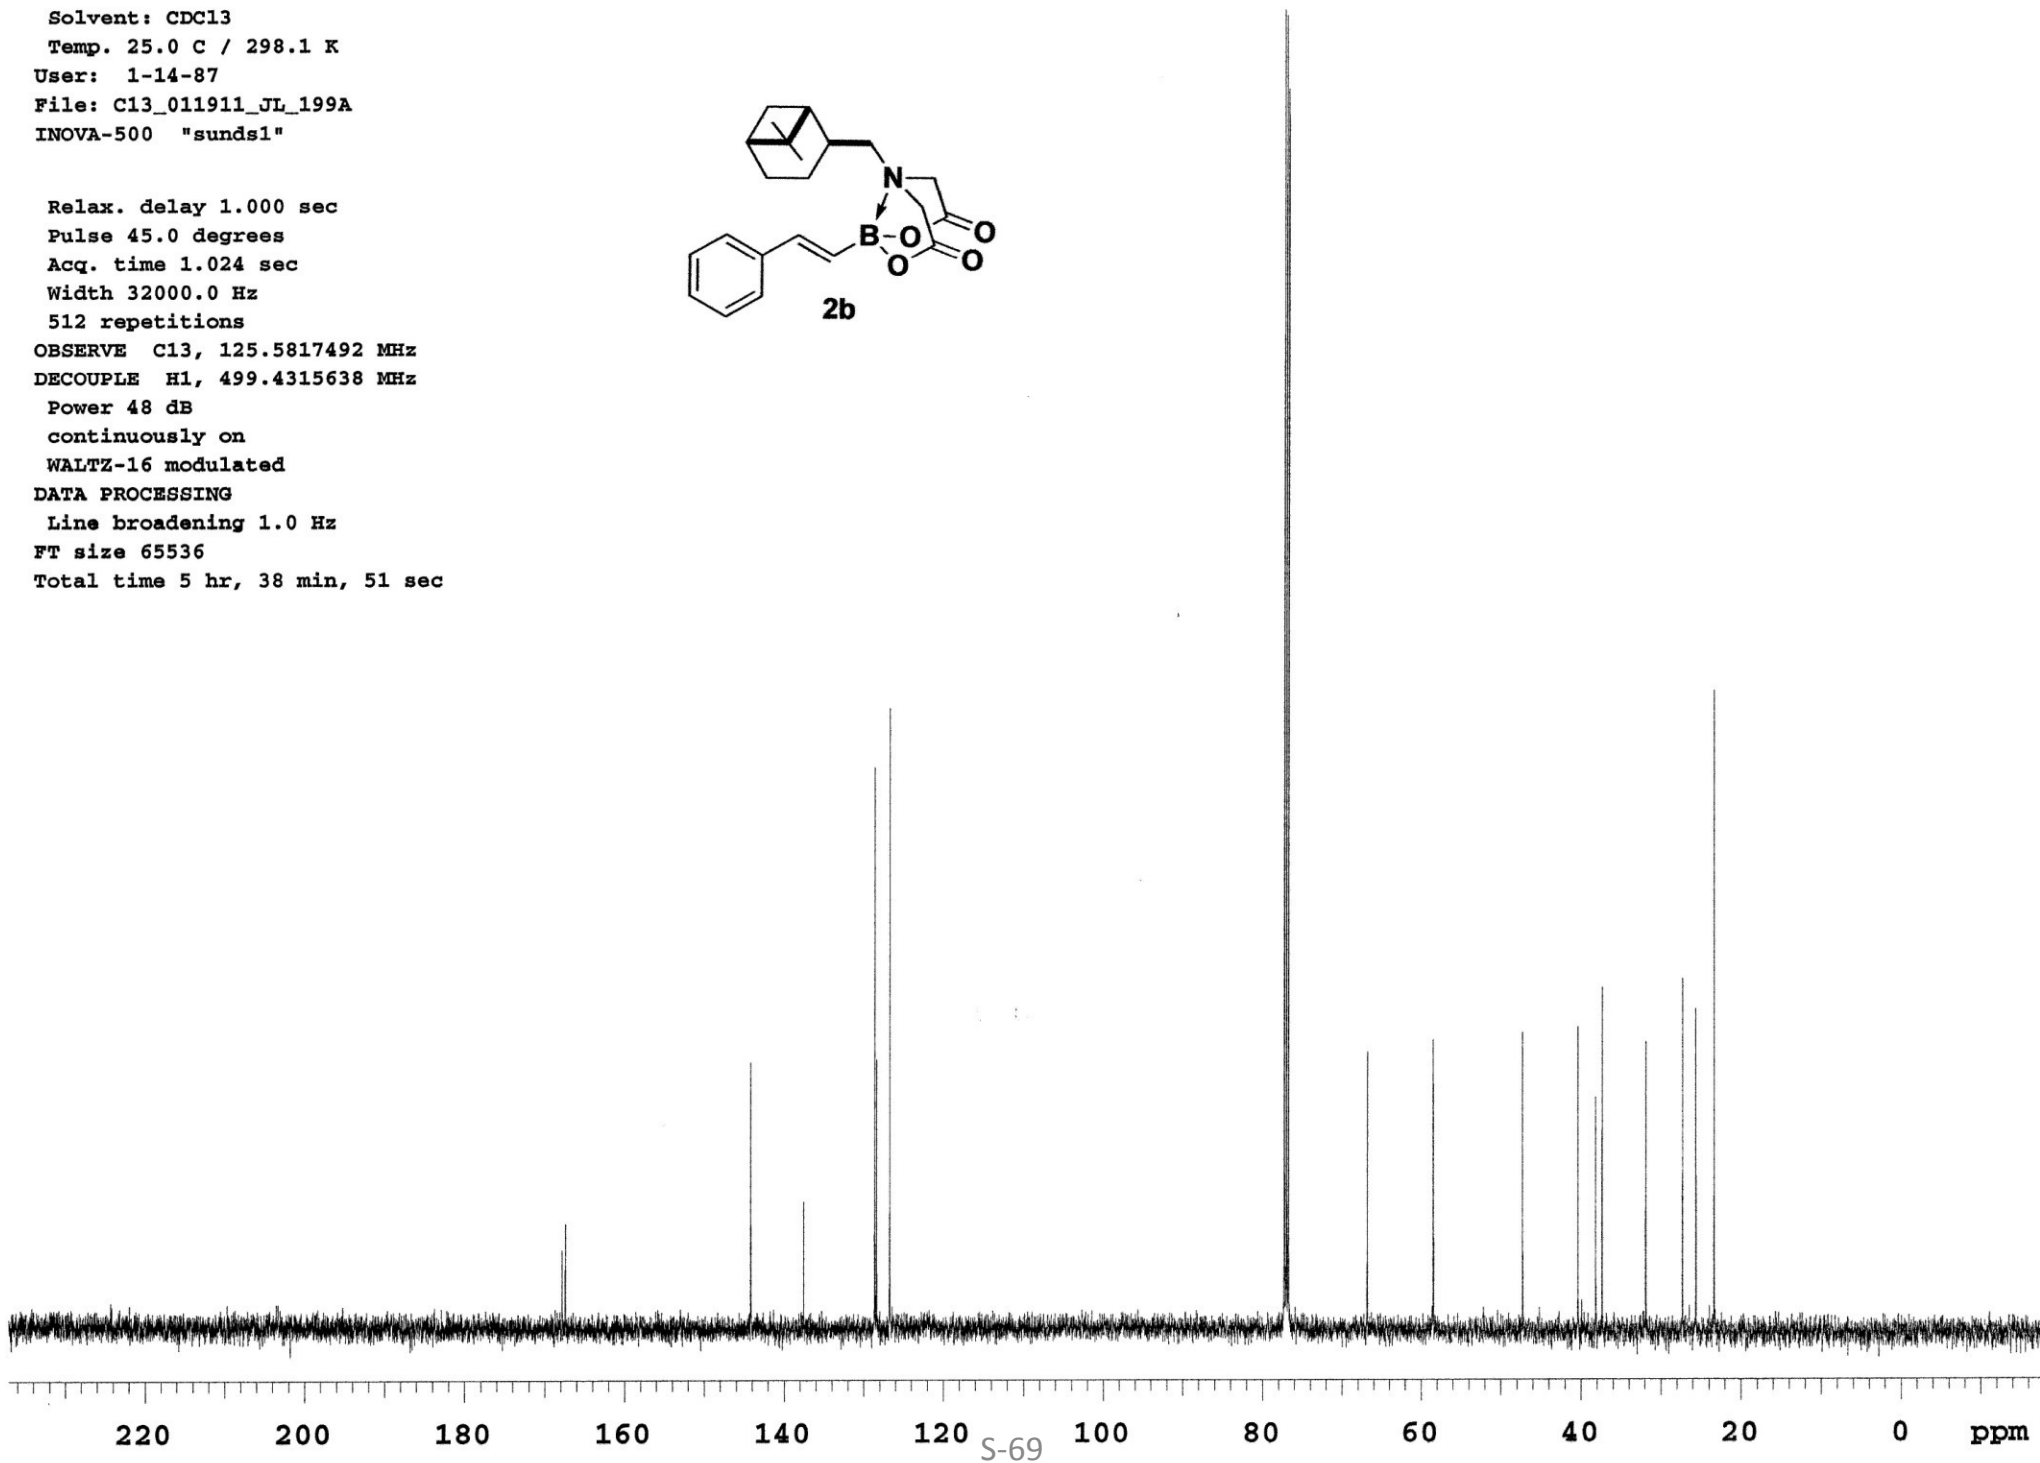

Pulse Sequence: s2pul  
exp1 s2pul

| SAMPLE      |             | DEC. & VT  |          |
|-------------|-------------|------------|----------|
| date        | Nov 17 2010 | dfrq       | 499.435  |
| solvent     | Acetone     | dn         | H1       |
| file        | exp         | dpwr       | 25       |
| ACQUISITION |             | dof        | 0        |
| sfrq        | 499.435     | dm         | nnn      |
| tn          | H1          | dmm        | c        |
| at          | 4.096       | dmf        | 200      |
| np          | 65536       | dseq       |          |
| sw          | 8000.0      | dres       | 1.0      |
| fb          | 4000        | homo       | n        |
| bs          | 4           | DEC2       |          |
| tpwr        | 62          | dfrq2      | 0        |
| pw          | 7.2         | dn2        |          |
| d1          | 0           | dpwr2      | 1        |
| tof         | 0           | dof2       | 0        |
| nt          | 8           | dm2        | n        |
| ct          | 8           | dmm2       | c        |
| alock       | n           | dmf2       | 200      |
| gain        | not used    | dseq2      |          |
| FLAGS       |             | dres2      | 1.0      |
| il          | n           | homo2      | n        |
| in          | n           | PROCESSING |          |
| dp          | y           | lb         | 0.30     |
| hs          | nn          | wtfile     |          |
| DISPLAY     |             | proc       | ft       |
| sp          | -249.8      | fn         | not used |
| wp          | 4994.1      | math       | f        |
| vs          | 151         | werr       |          |
| sc          | 0           | wexp       |          |
| wc          | 250         | wbs        |          |
| hzmm        | 19.98       | wnt        |          |
| is          | 33.57       |            |          |
| rfl         | 2534.7      |            |          |
| rfp         | 1023.8      |            |          |
| th          | 7           |            |          |
| ins         | 1.000       |            |          |
| nm          | ph          |            |          |

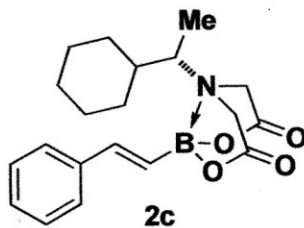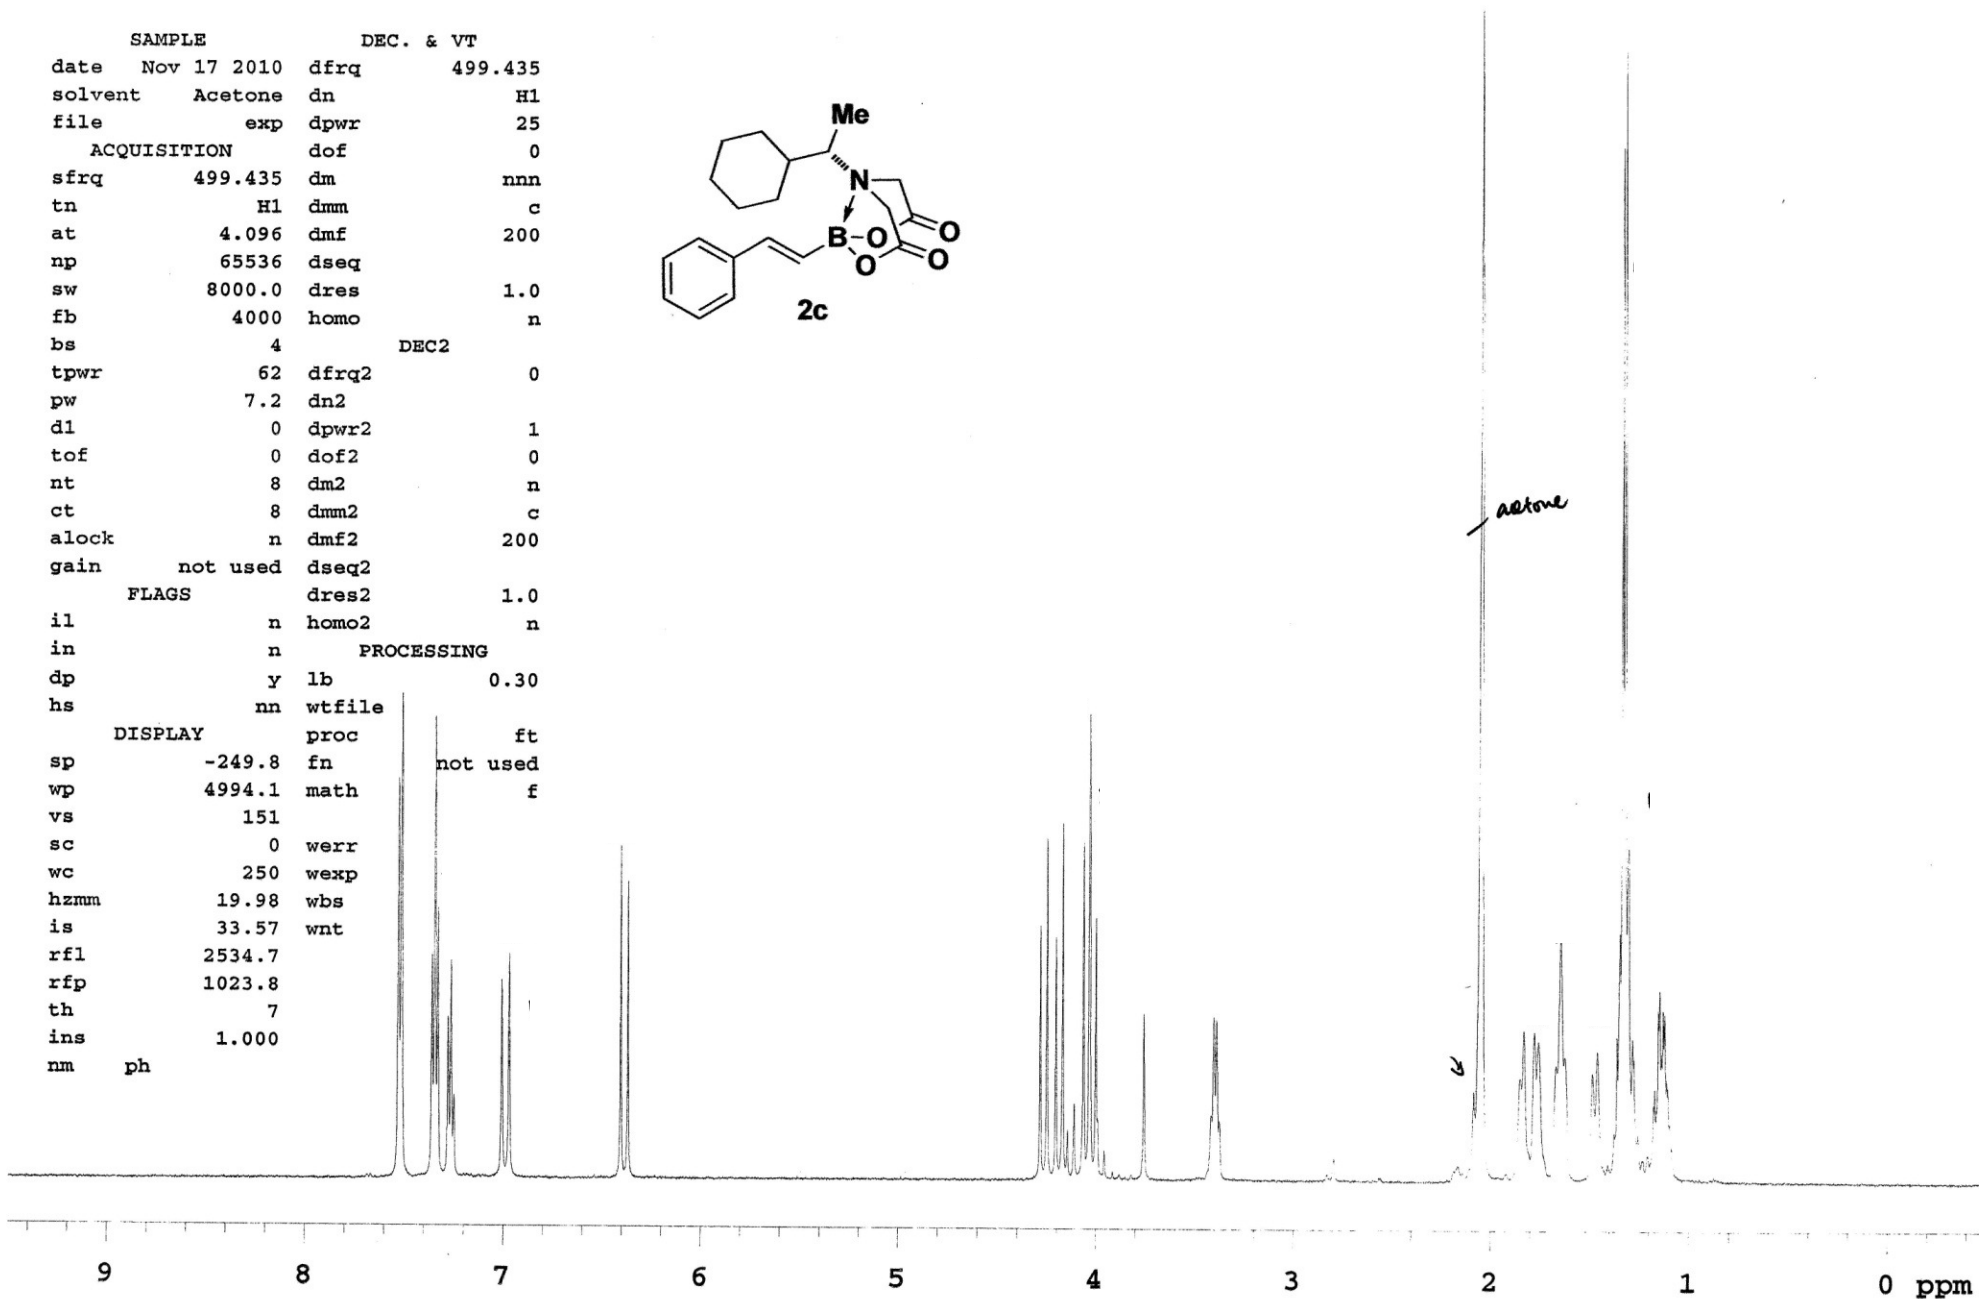

Pulse Sequence: s2pul

Solvent: CDCl3  
Ambient temperature  
User: 1-14-87  
INOVA-500 "vvr500"

Relax. delay 1.000 sec  
Pulse 45.0 degrees  
Acq. time 1.024 sec  
Width 32000.0 Hz  
1168 repetitions  
OBSERVE C13, 125.5817502 MHz  
DECOUPLE H1, 499.4315638 MHz  
Power 48 dB  
continuously on  
WALTZ-16 modulated  
DATA PROCESSING  
Line broadening 1.0 Hz  
FT size 65536  
Total time 5 hr, 38 min, 51 sec

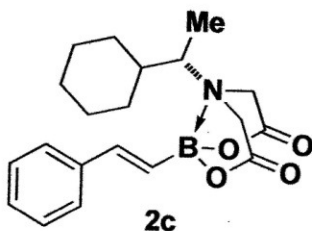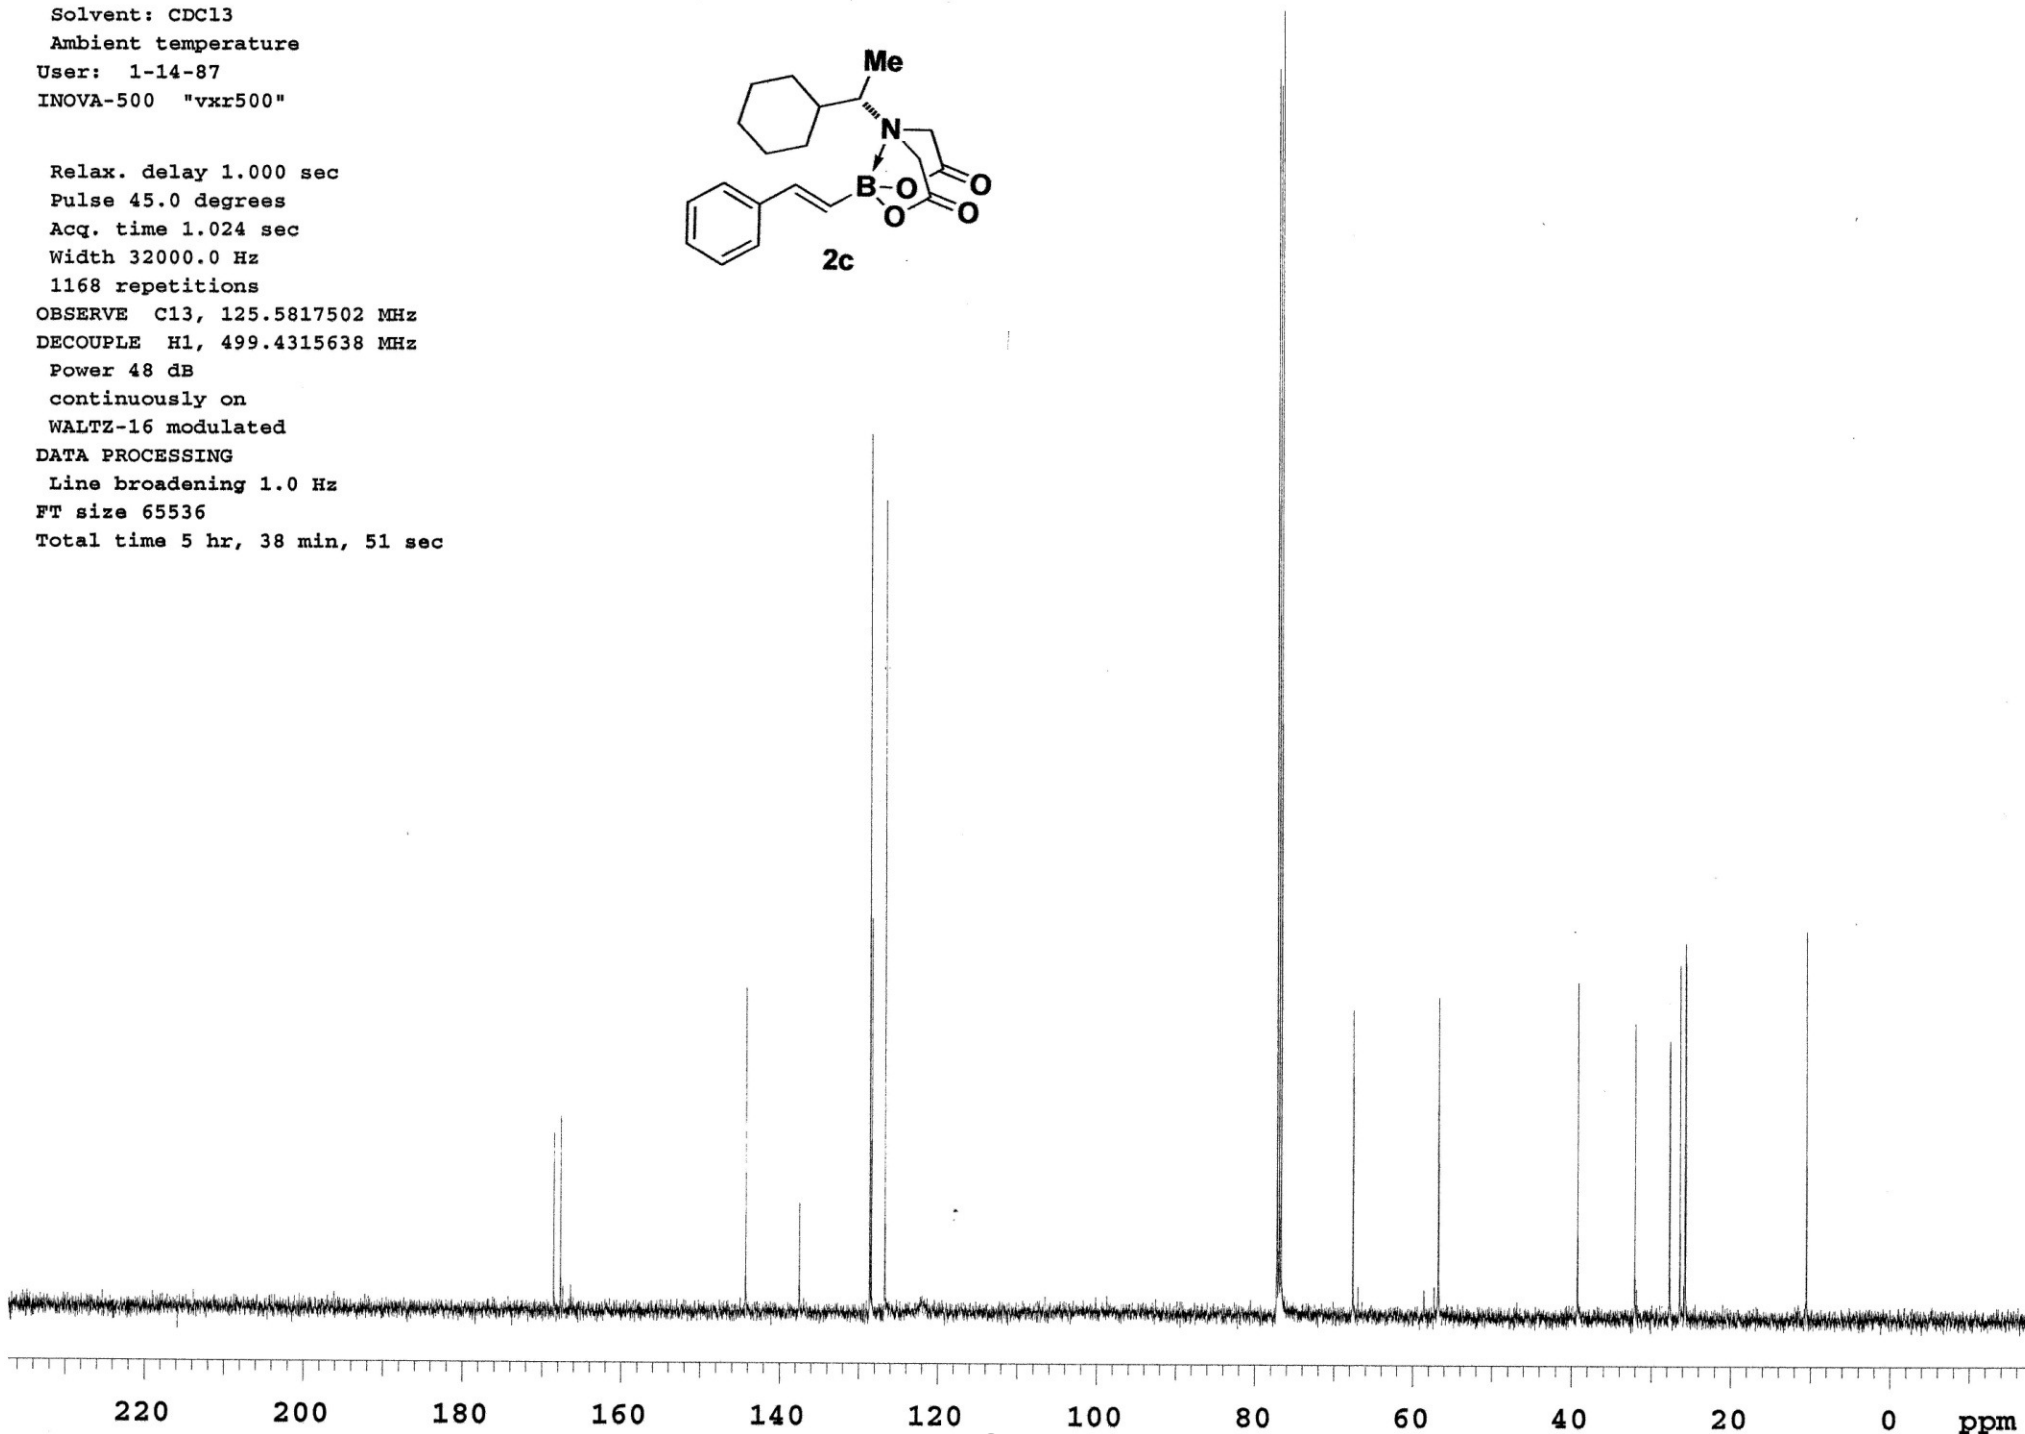

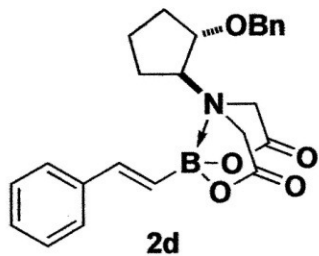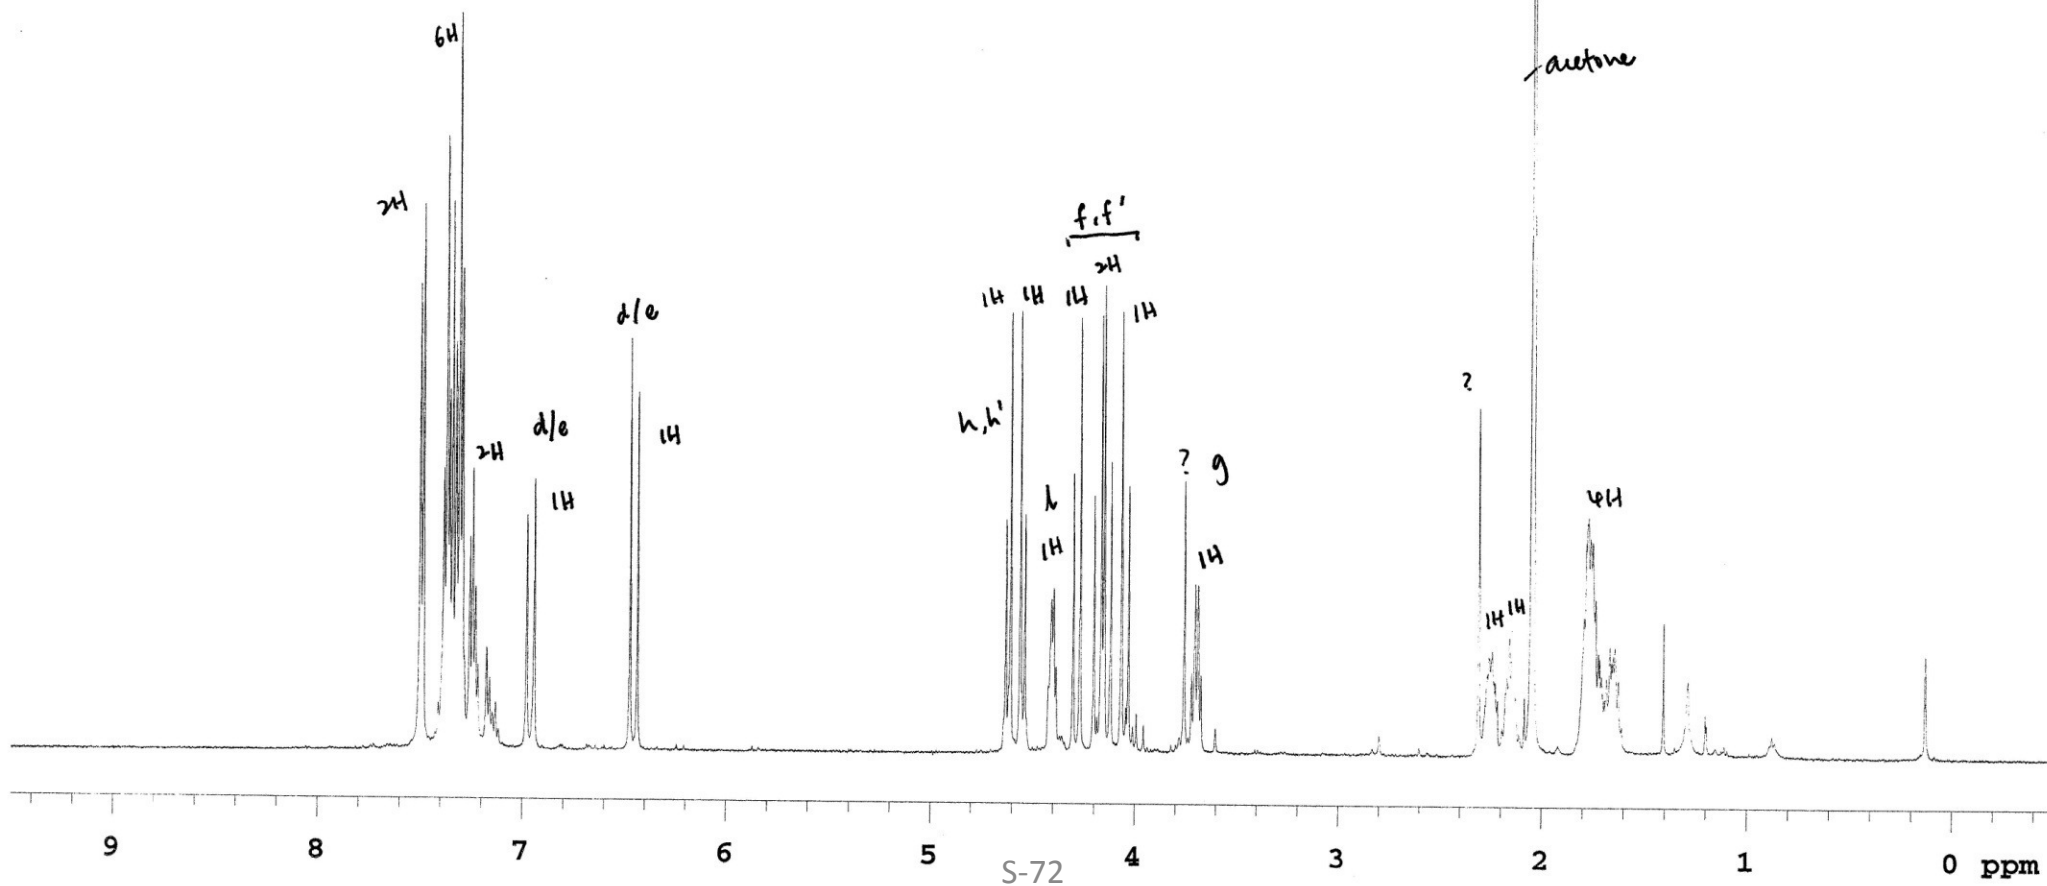



Pulse Sequence: s2pul

Solvent: CDC13

Temp. 25.0 C / 298.1 K

User: 1-14-87

File: C13\_011911\_JL\_165A

INOVA-500 "sunds1"

Relax. delay 1.000 sec

Pulse 45.0 degrees

Acq. time 1.024 sec

Width 32000.0 Hz

624 repetitions

OBSERVE C13, 125.5817502 MHz

DECOUPLE H1, 499.4315638 MHz

Power 48 dB

continuously on

WALTZ-16 modulated

DATA PROCESSING

Line broadening 1.0 Hz

FT size 65536

Total time 5 hr, 38 min, 51 sec

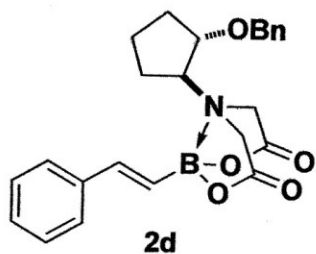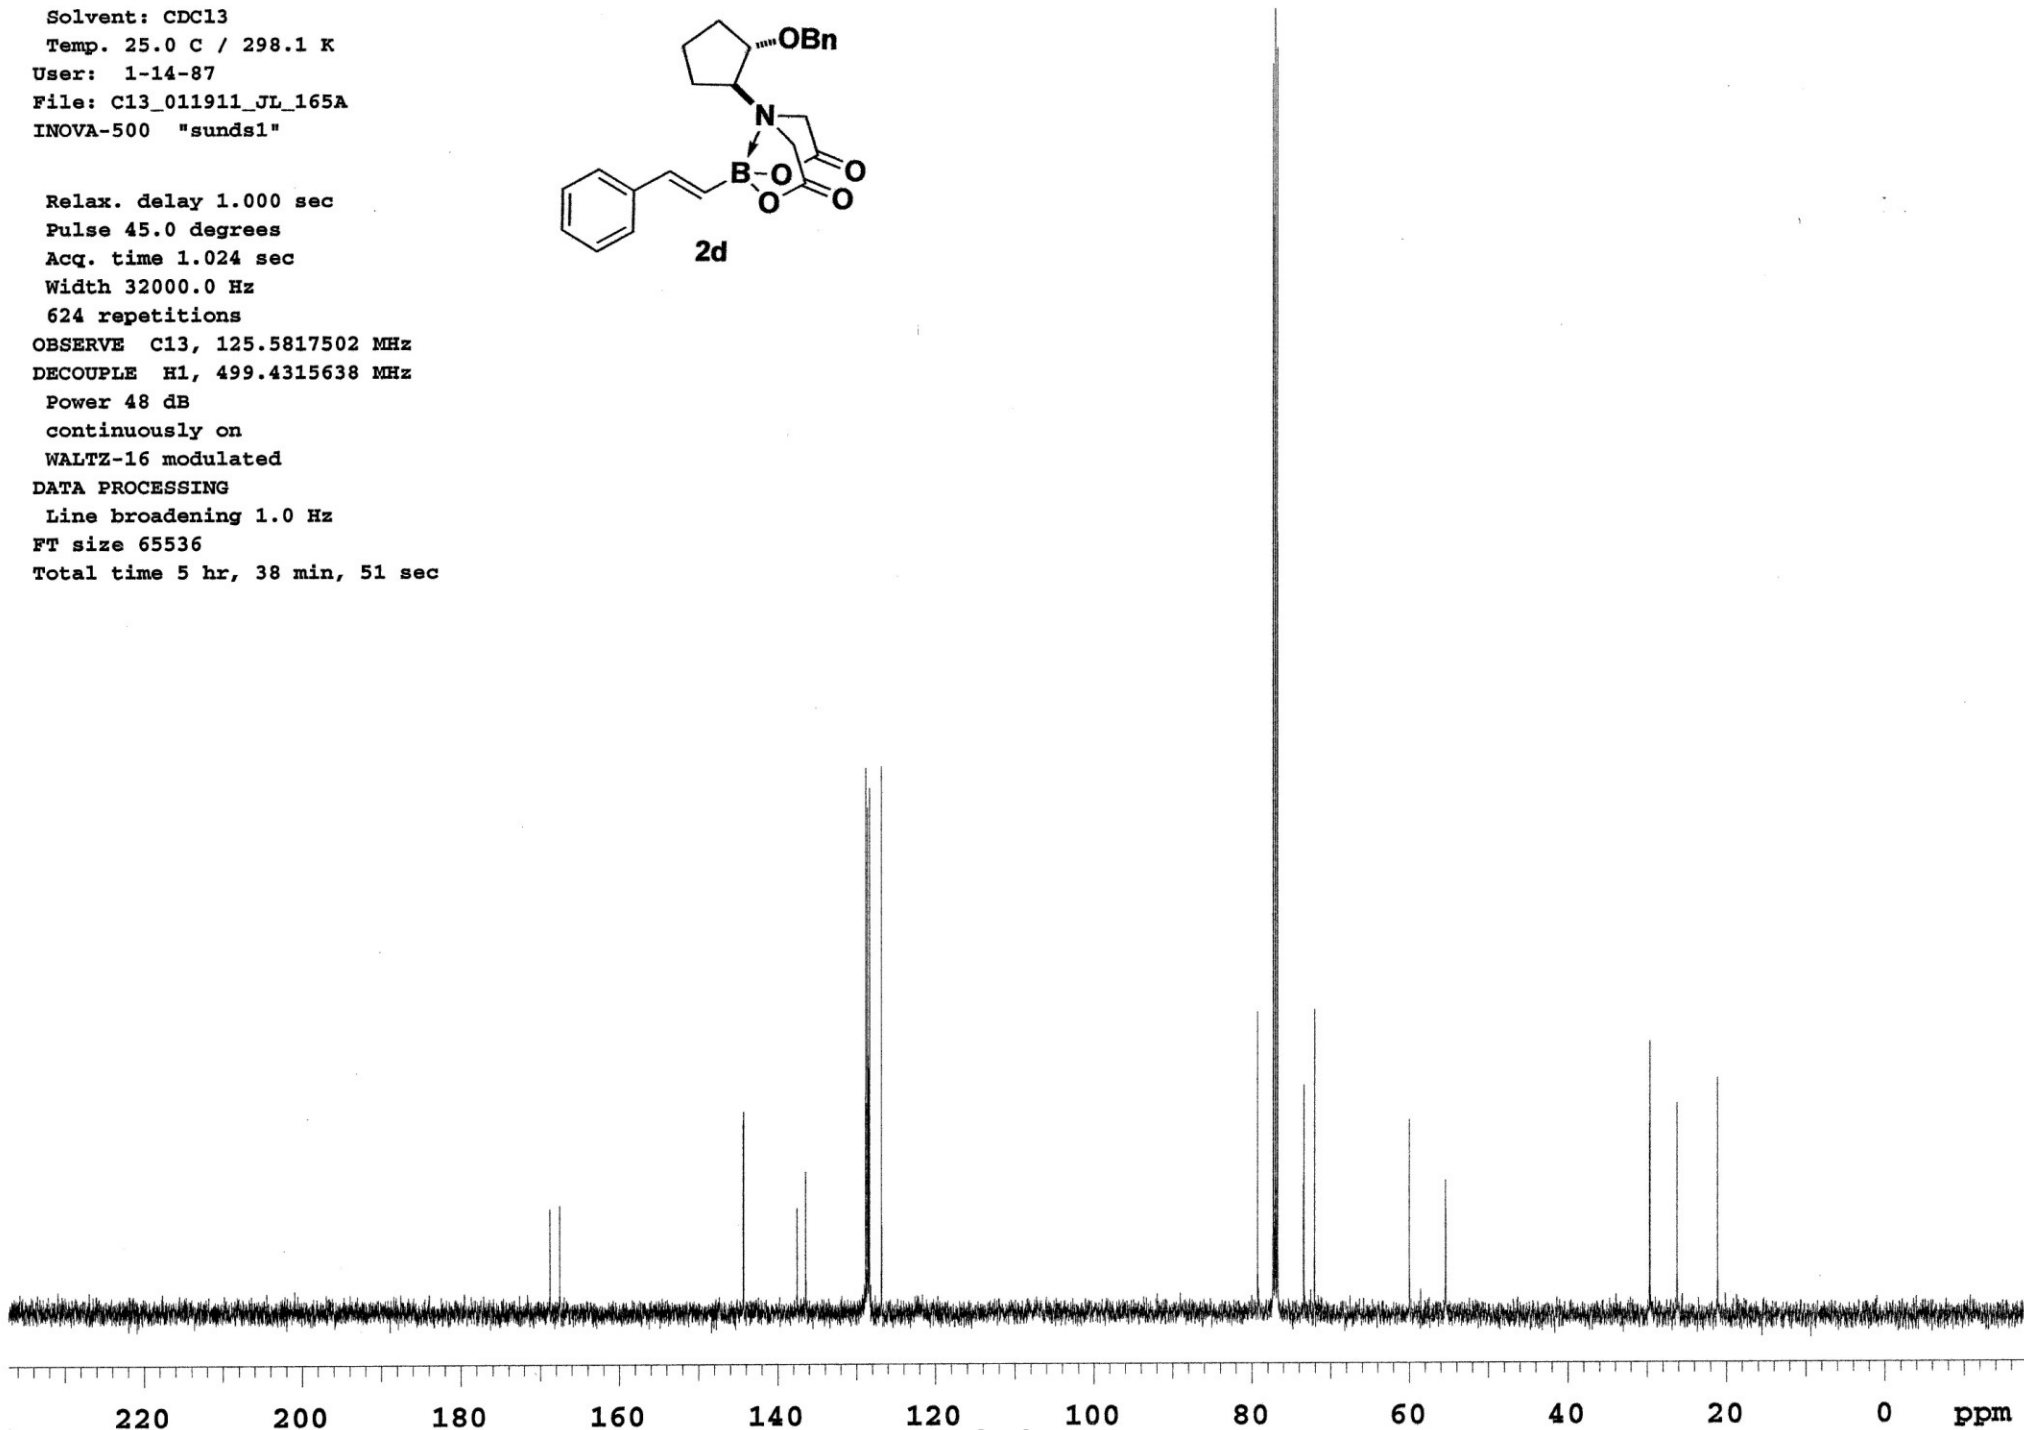

Pulse Sequence: s2pul

Solvent: CDCl3

Ambient temperature

INOVA-500 "u500"

Pulse 61.6 degrees

Acq. time 4.665 sec

Width 7024.9 Hz

16 repetitions

OBSERVE H1, 499.6906574 MHz

DATA PROCESSING

Line broadening 0.3 Hz

FT size 65536

Total time 1 min, 14 sec

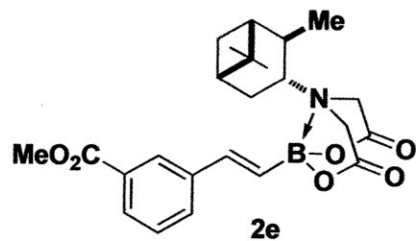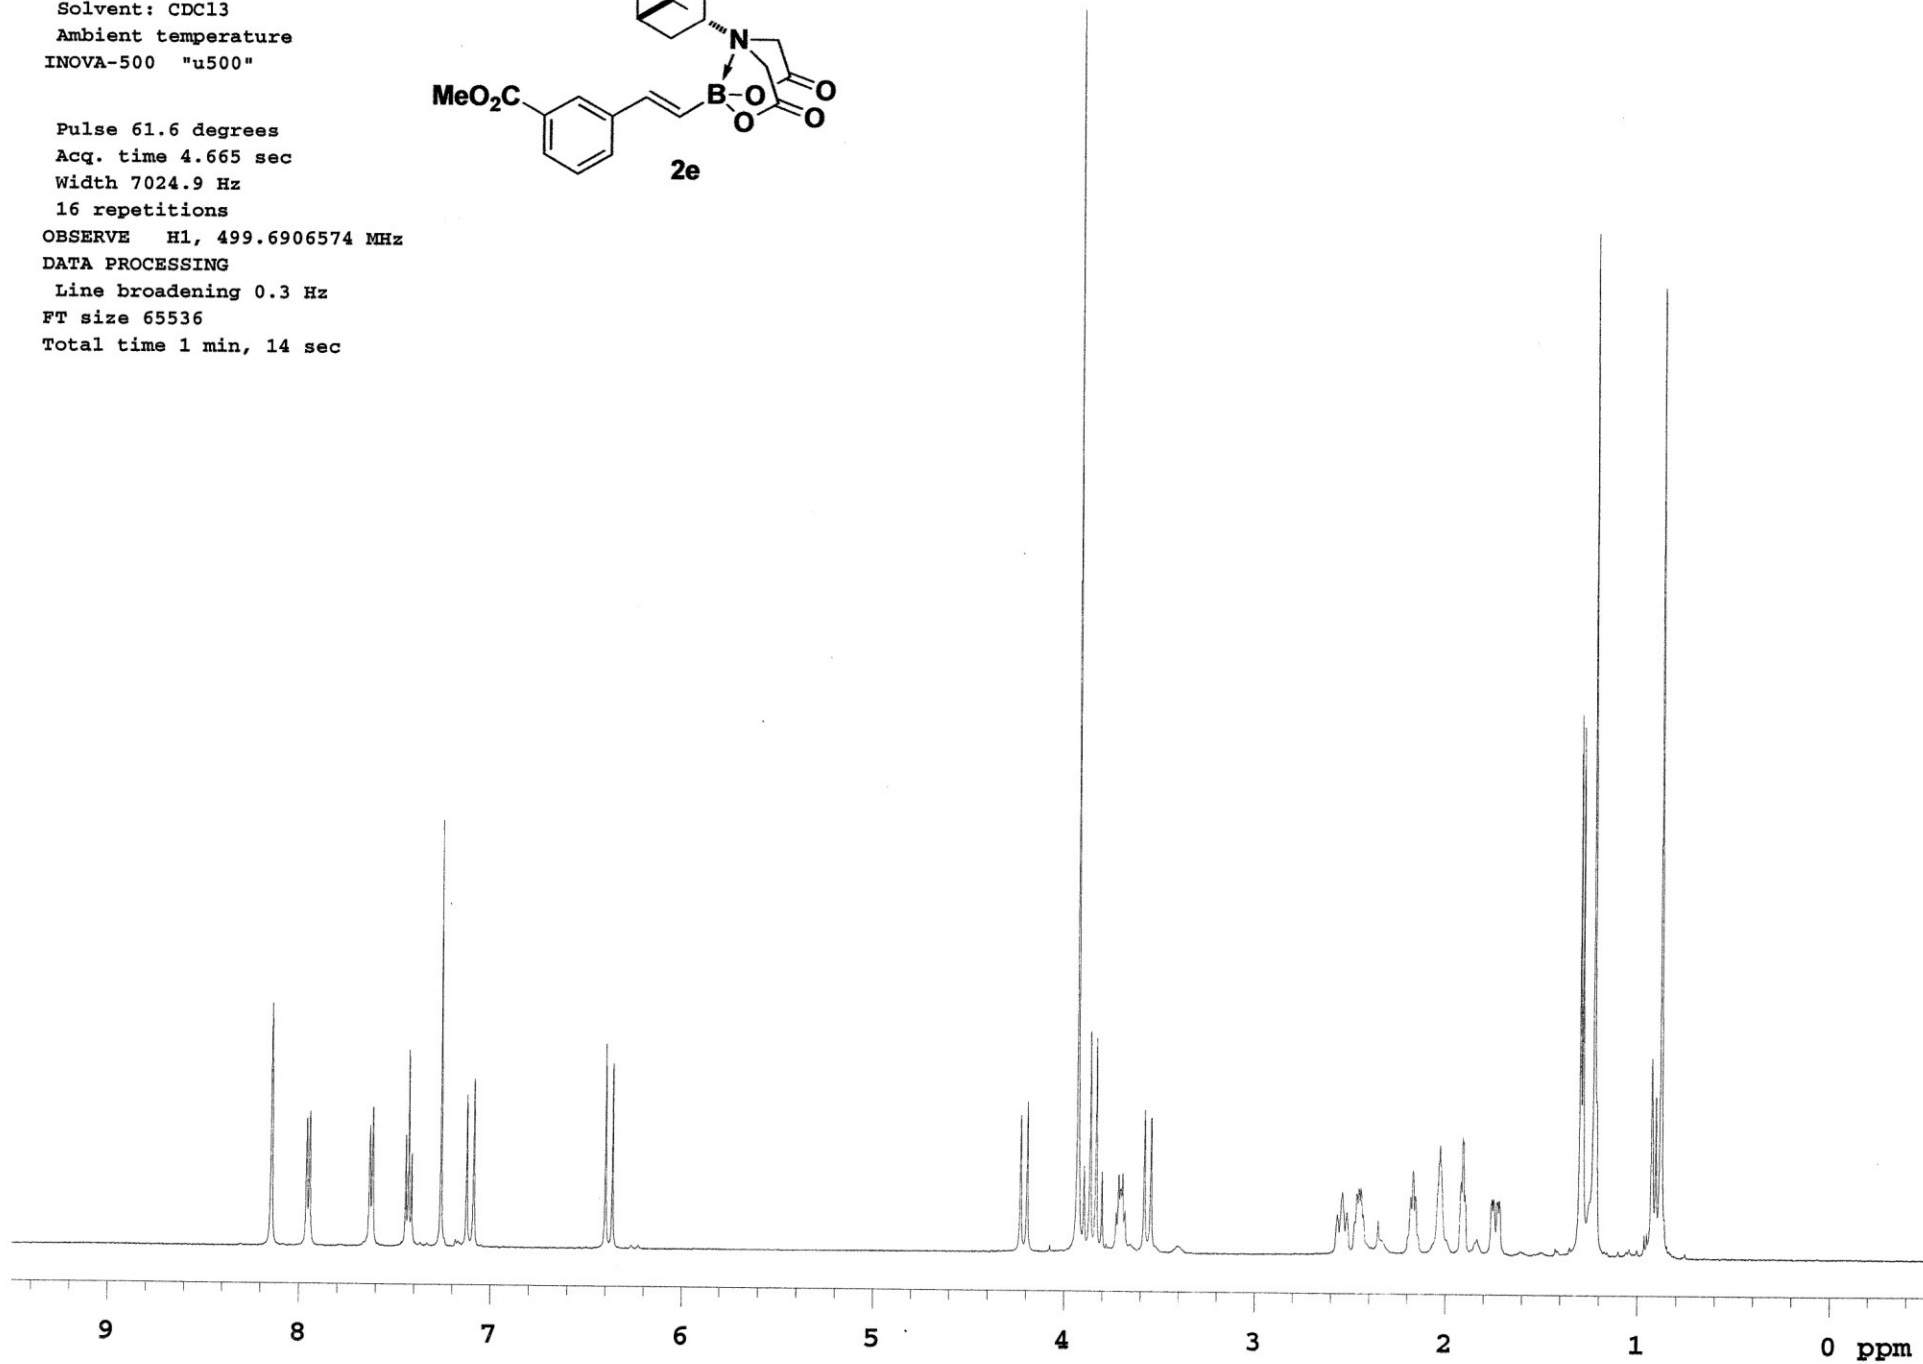

Pulse Sequence: s2pul

Solvent: CDCl<sub>3</sub>

Ambient temperature

User: 1-14-87

INOVA-500 "vvr500"

Relax. delay 1.000 sec

Pulse 45.0 degrees

Acq. time 1.024 sec

Width 32000.0 Hz

352 repetitions

OBSERVE C13, 125.5817522 MHz

DECOUPLE H1, 499.4315638 MHz

Power 44 dB

continuously on

WALTZ-16 modulated

DATA PROCESSING

Line broadening 1.0 Hz

FT size 65536

Total time 33 min, 54 sec

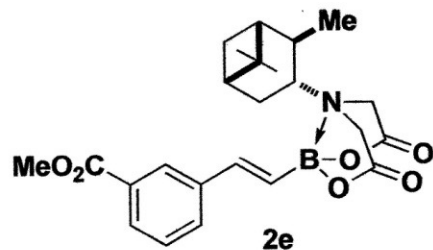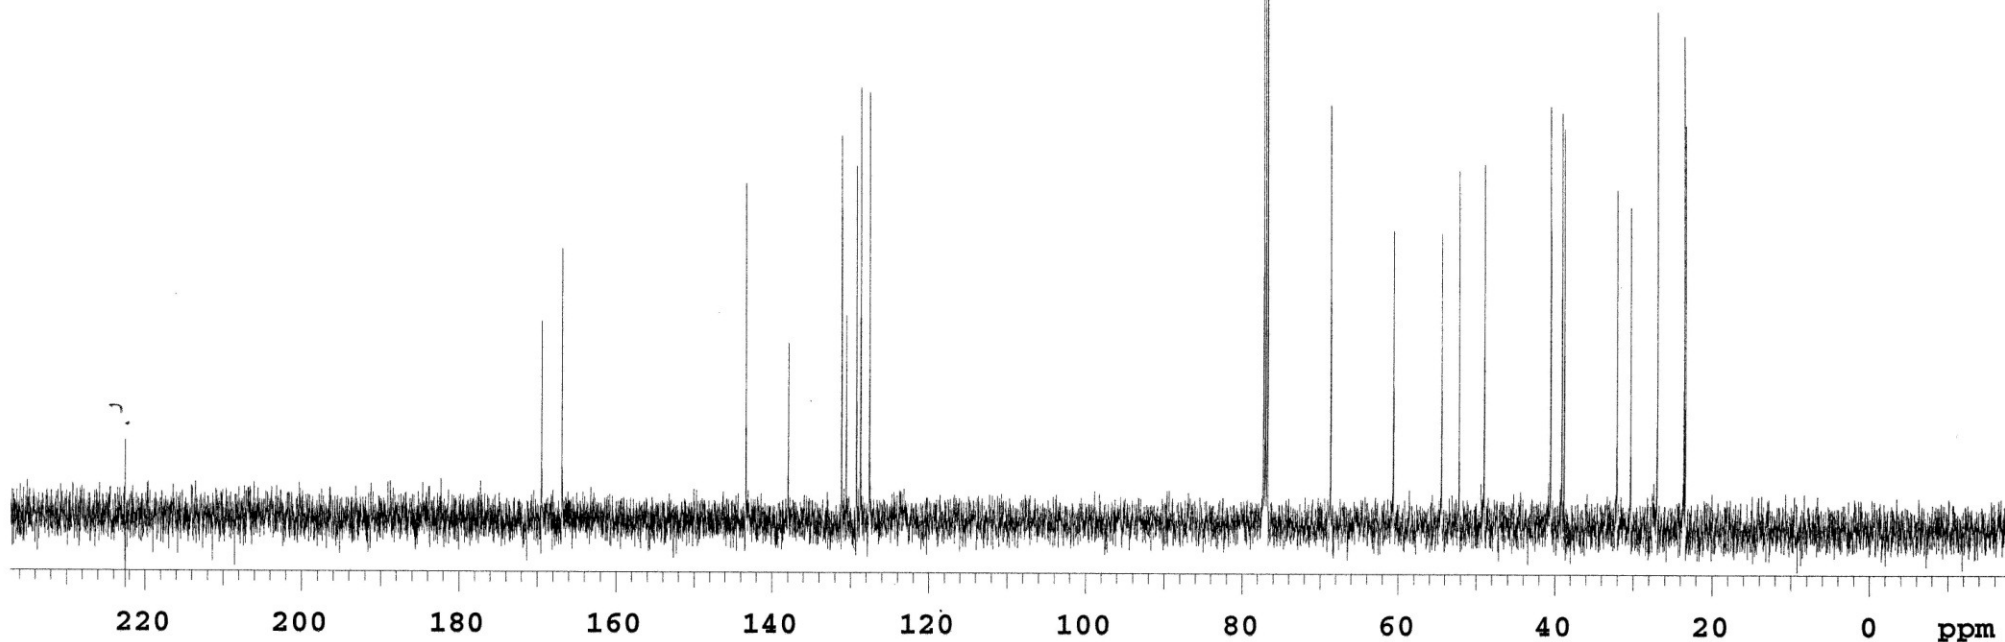

Pulse Sequence: s2pul

Solvent: CDCl3

Ambient temperature

File: 040411\_JL\_243A

INOVA-500 "sunds1"

Pulse 45.0 degrees

Acq. time 4.096 sec

Width 8000.0 Hz

4 repetitions

OBSERVE H1, 499.4299002 MHz

DATA PROCESSING

Line broadening 0.3 Hz

FT size 65536

Total time 0 min, 16 sec

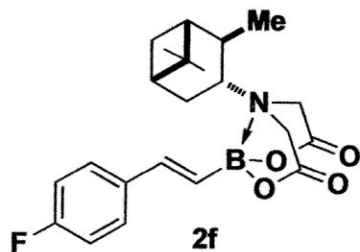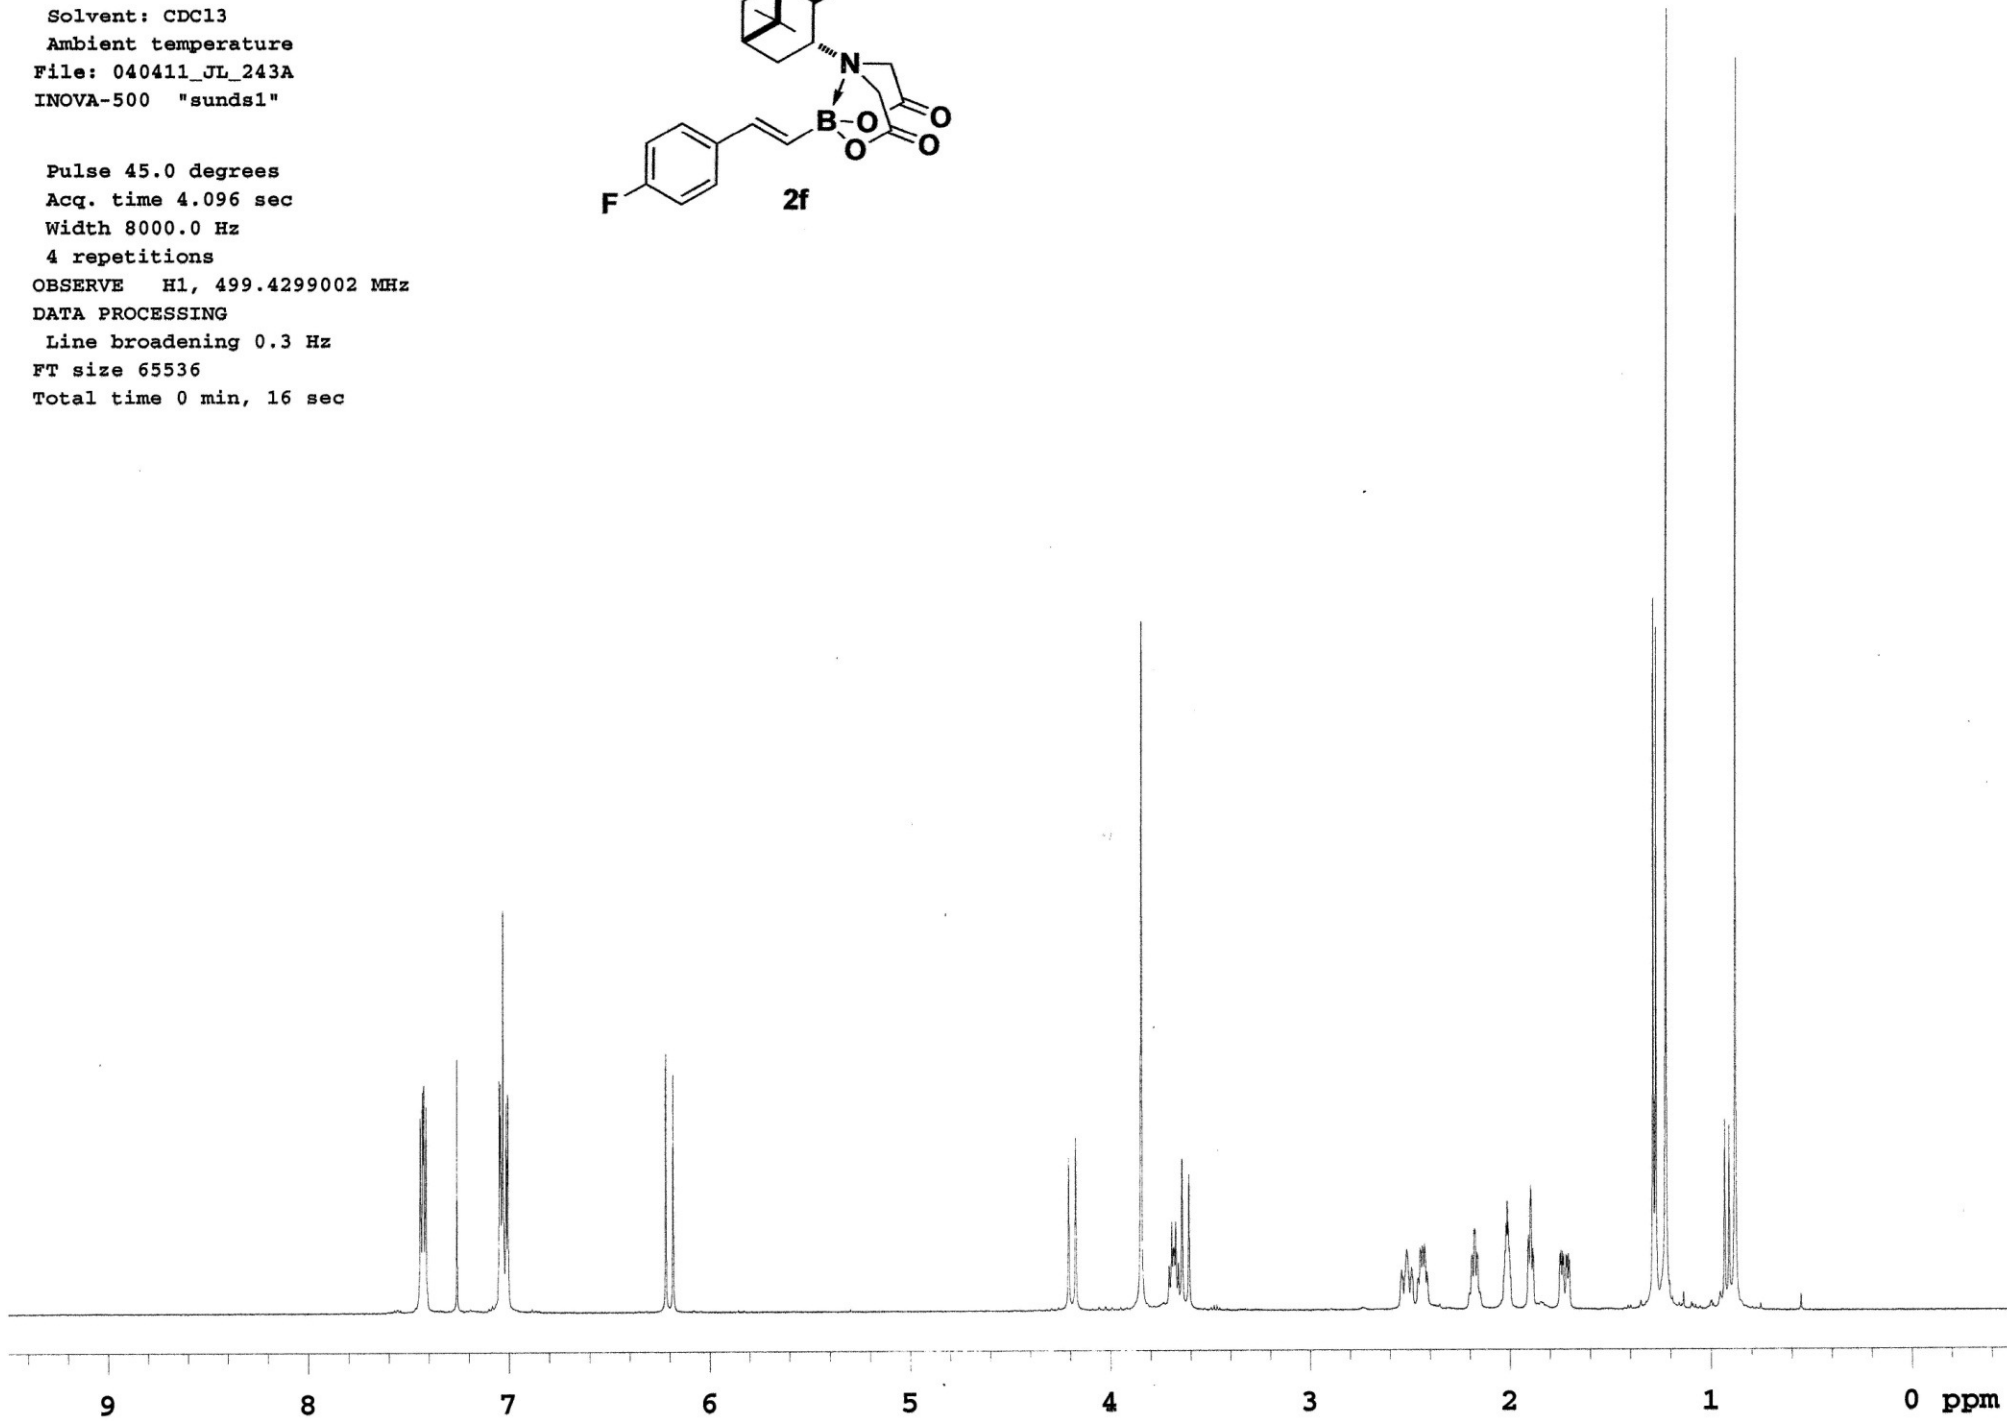

Pulse Sequence: s2pul

Solvent: CDCl3  
Ambient temperature  
User: 1-14-87  
INOVA-500 "vvr500"

Relax. delay 1.000 sec  
Pulse 45.0 degrees  
Acq. time 1.024 sec  
Width 32000.0 Hz  
304 repetitions  
OBSERVE C13, 125.5817512 MHz  
DECOUPLE H1, 499.4315638 MHz  
Power 44 dB  
continuously on  
WALTZ-16 modulated  
DATA PROCESSING  
Line broadening 1.0 Hz  
FT size 65536  
Total time 33 min, 54 sec

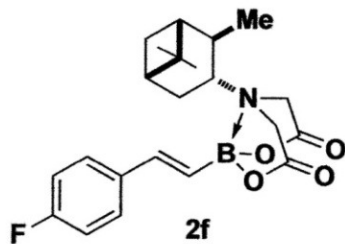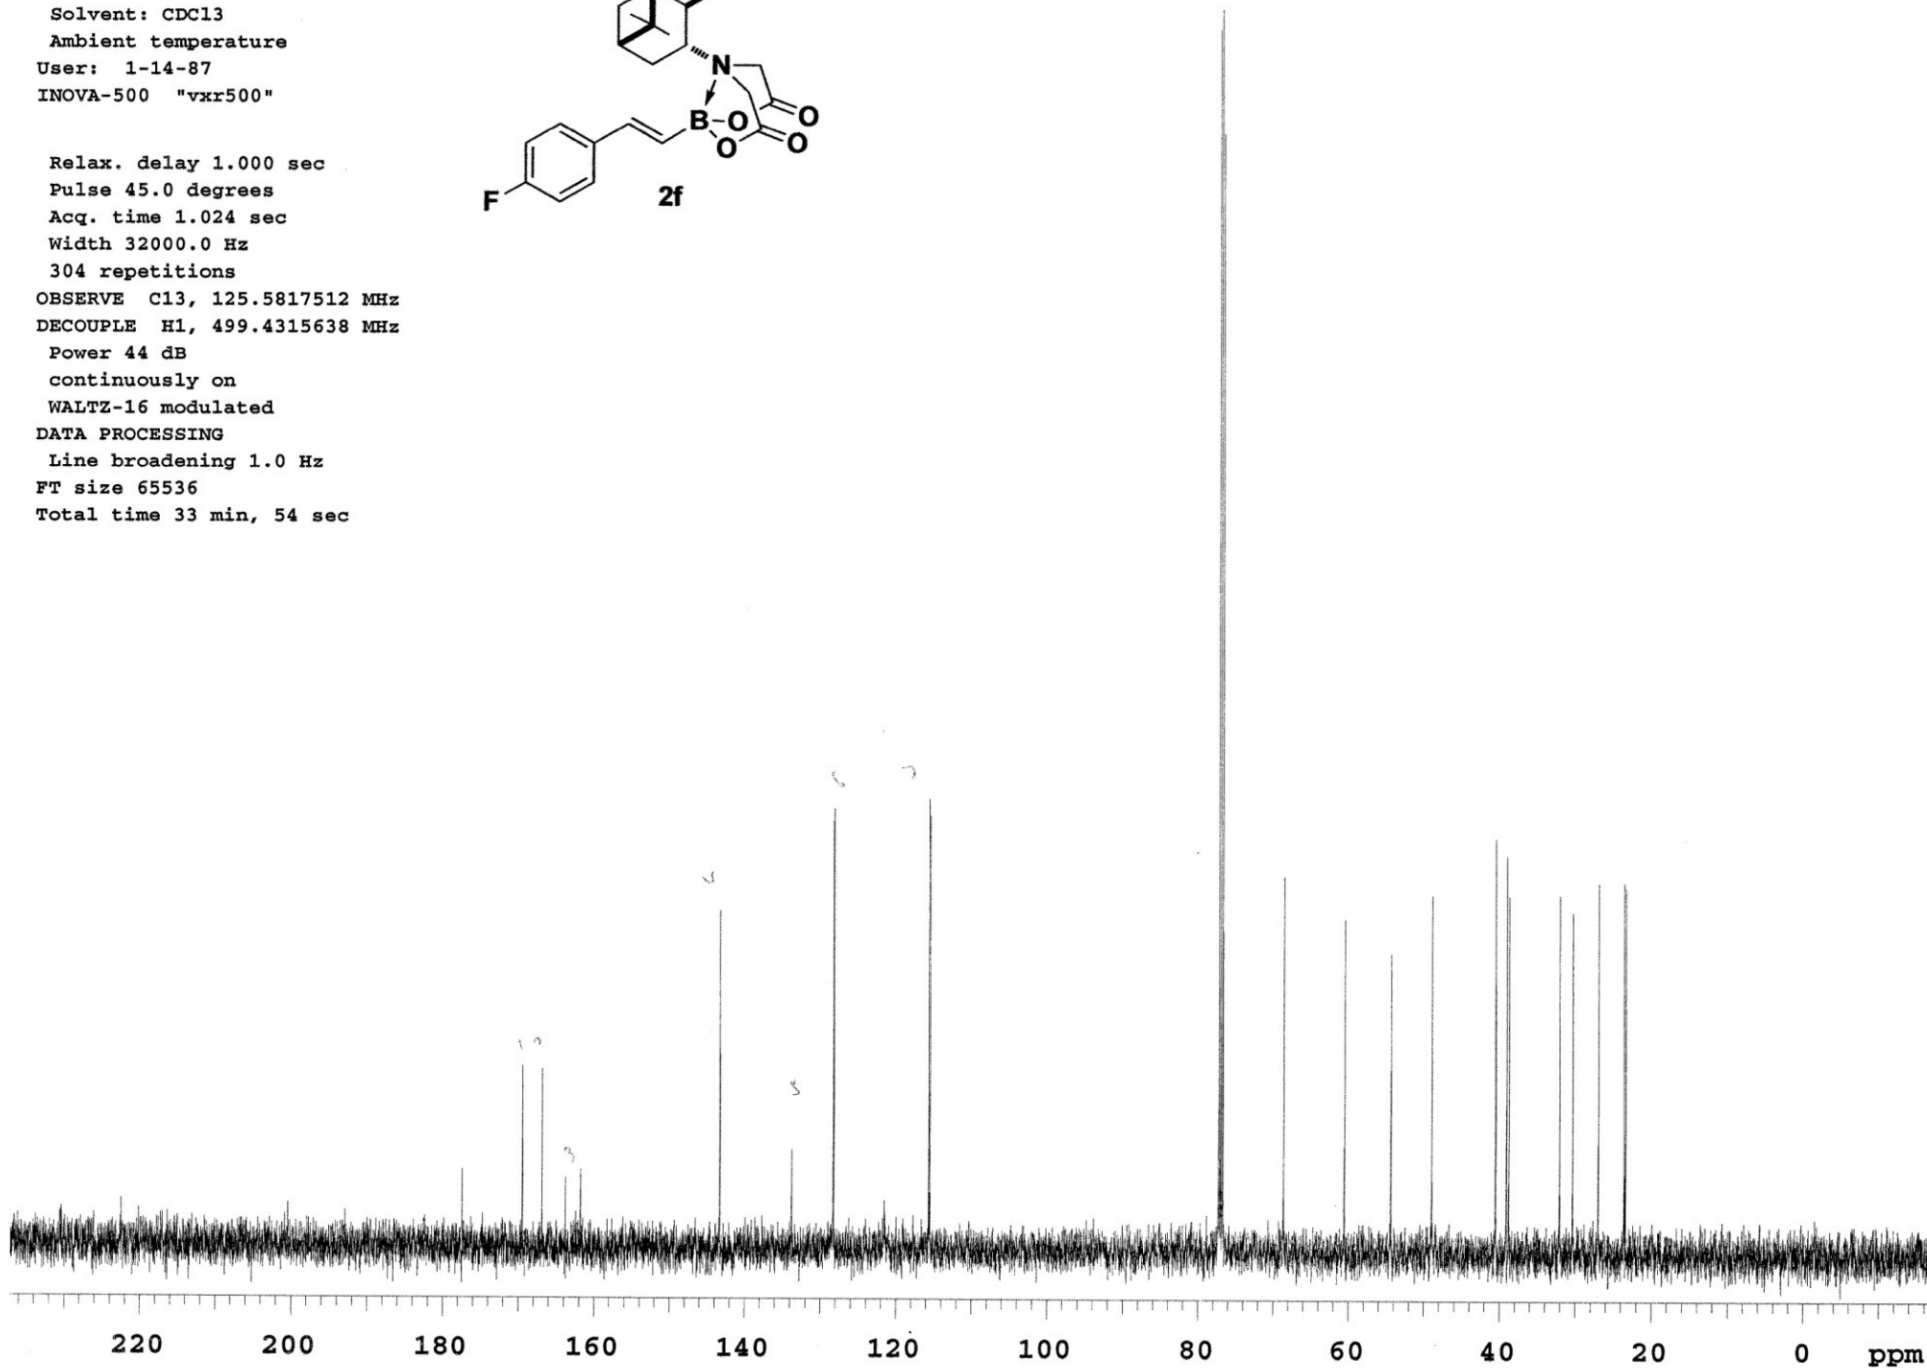

Pulse Sequence: s2pul  
 expl s2pul

|             |            |            |          |
|-------------|------------|------------|----------|
| SAMPLE      |            | DEC. & VT  |          |
| date        | Jan 6 2011 | dfrq       | 499.435  |
| solvent     | Acetone    | dn         | H1       |
| file        | exp        | dpwr       | 25       |
| ACQUISITION |            | dof        | 0        |
| sfrq        | 499.435    | dm         | nnn      |
| tn          | H1         | dmm        | c        |
| at          | 4.096      | dmf        | 200      |
| np          | 65536      | dseq       |          |
| sw          | 8000.0     | dres       | 1.0      |
| fb          | 4000       | homo       | n        |
| bs          | 4          | DEC2       |          |
| tpwr        | 62         | dfrq2      | 0        |
| pw          | 4.5        | dn2        |          |
| d1          | 0          | dpwr2      | 1        |
| tof         | 0          | dof2       | 0        |
| nt          | 4          | dm2        | n        |
| ct          | 4          | dmm2       | c        |
| alock       | n          | dmf2       | 200      |
| gain        | not used   | dseq2      |          |
| FLAGS       |            | dres2      | 1.0      |
| il          | n          | homo2      | n        |
| in          | n          | PROCESSING |          |
| dp          | y          | lb         | 0.30     |
| hs          | nn         | wtfile     |          |
| DISPLAY     |            | proc       | ft       |
| sp          | -249.8     | fn         | not used |
| wp          | 4994.1     | math       | f        |
| vs          | 162        |            |          |
| sc          | 0          | werr       |          |
| wc          | 250        | wexp       |          |
| hzmm        | 19.98      | wbs        |          |
| is          | 33.57      | wnt        |          |
| rfl         | 2534.4     |            |          |
| rfp         | 1023.8     |            |          |
| th          | 7          |            |          |
| ins         | 100.000    |            |          |
| nm          | ph         |            |          |

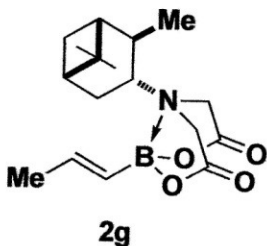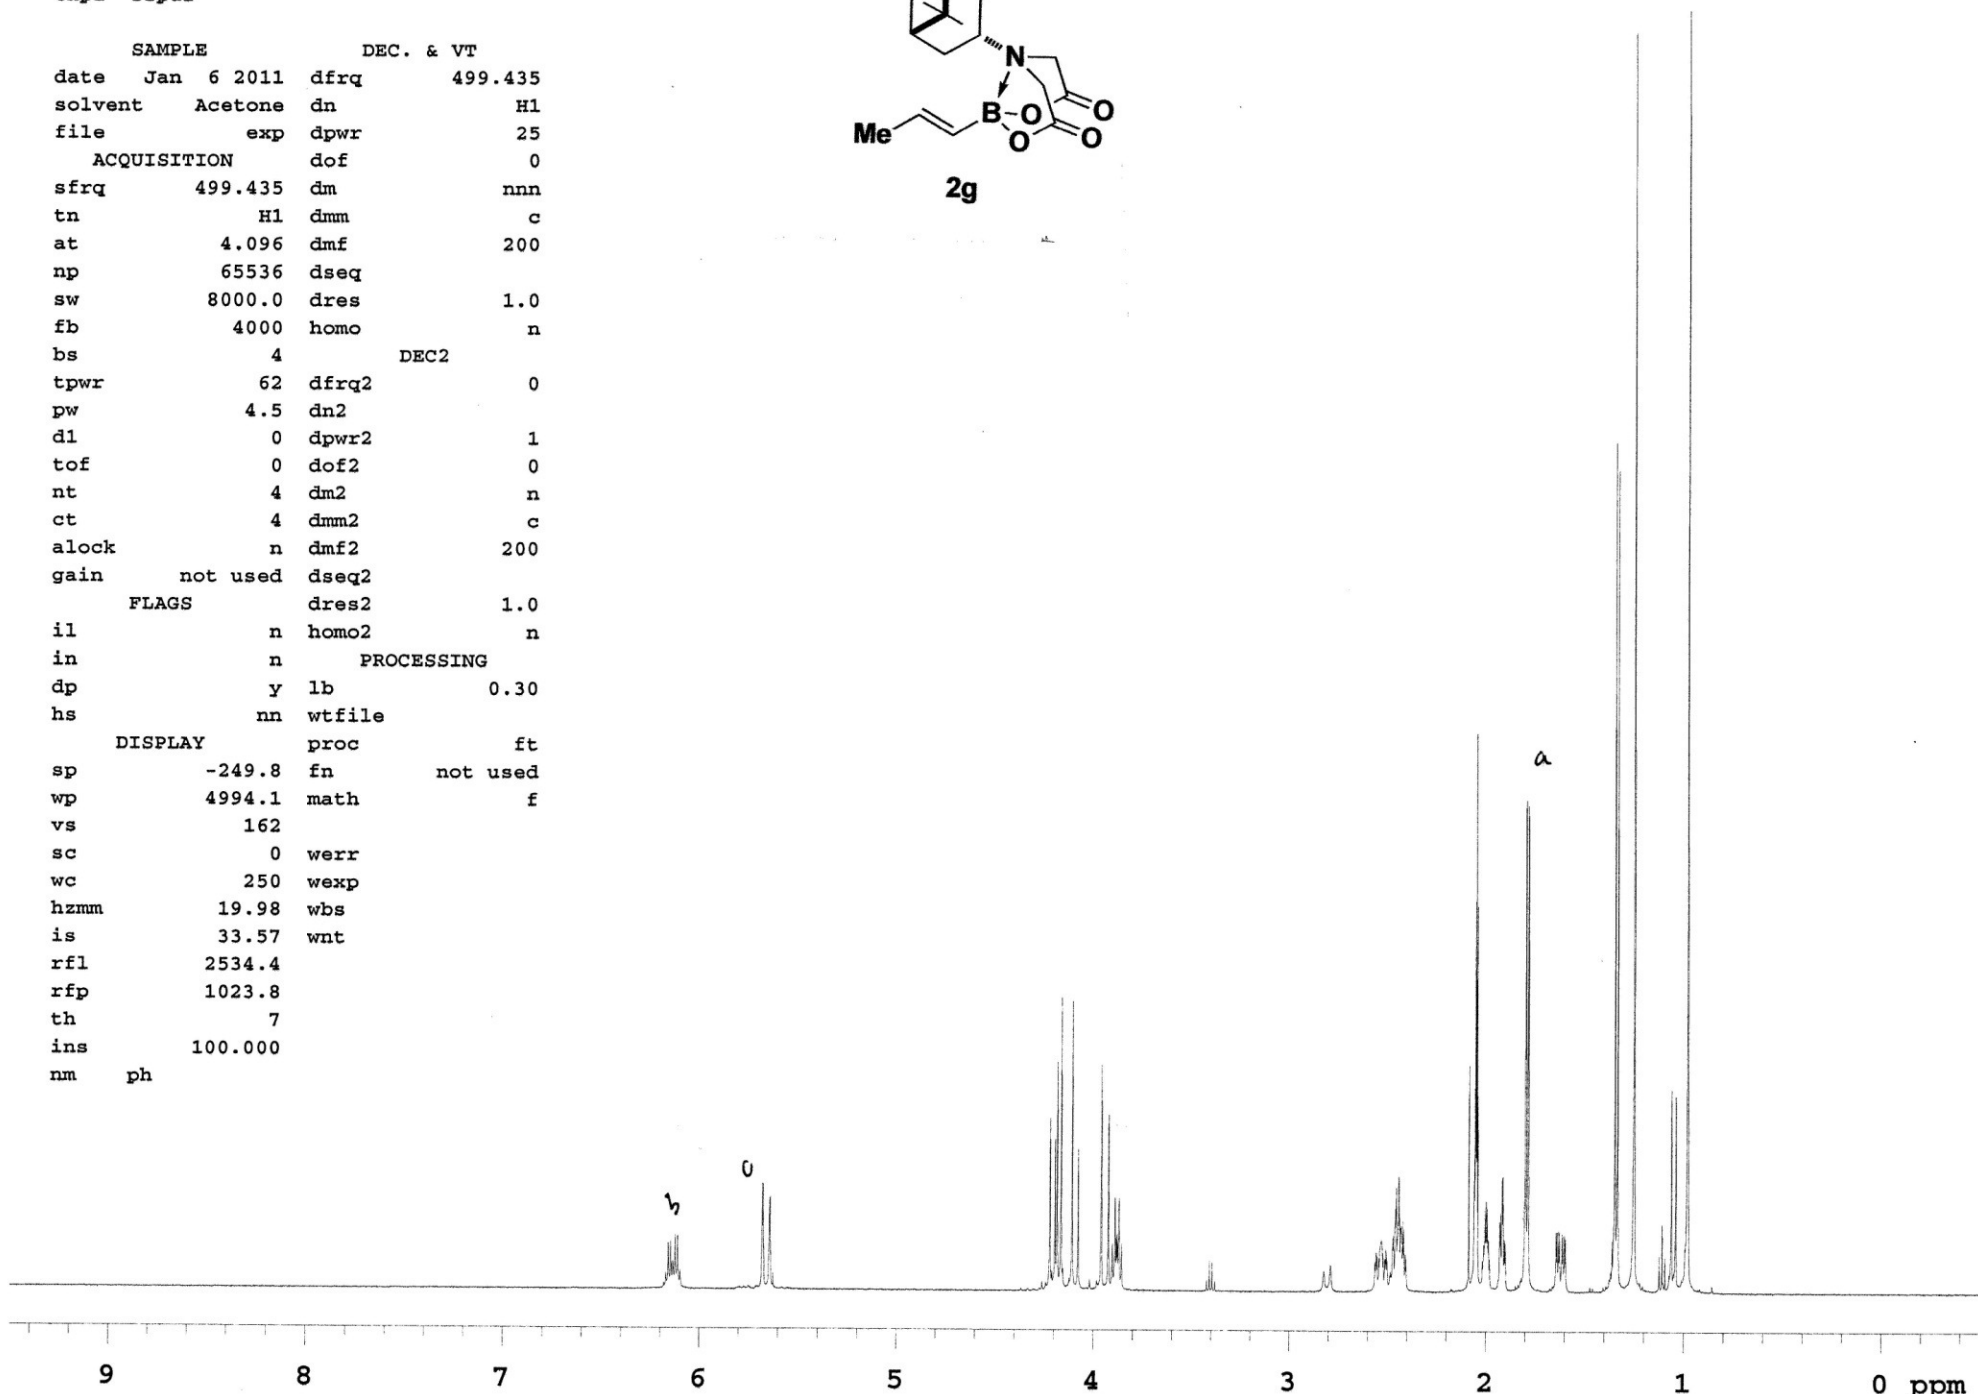

Pulse Sequence: s2pul

Solvent: Acetone

Ambient temperature

User: 1-14-87

INOVA-500 "vxxr500"

Relax. delay 1.000 sec

Pulse 45.0 degrees

Acq. time 1.024 sec

Width 32000.0 Hz

1248 repetitions

OBSERVE C13, 125.5823684 MHz

DECOUPLE H1, 499.4341558 MHz

Power 48 dB

continuously on

WALTZ-16 modulated

DATA PROCESSING

Line broadening 1.0 Hz

FT size 65536

Total time 5 hr, 38 min, 51 sec

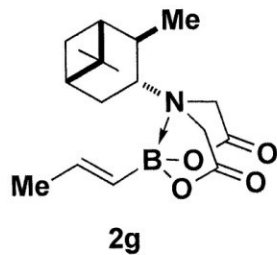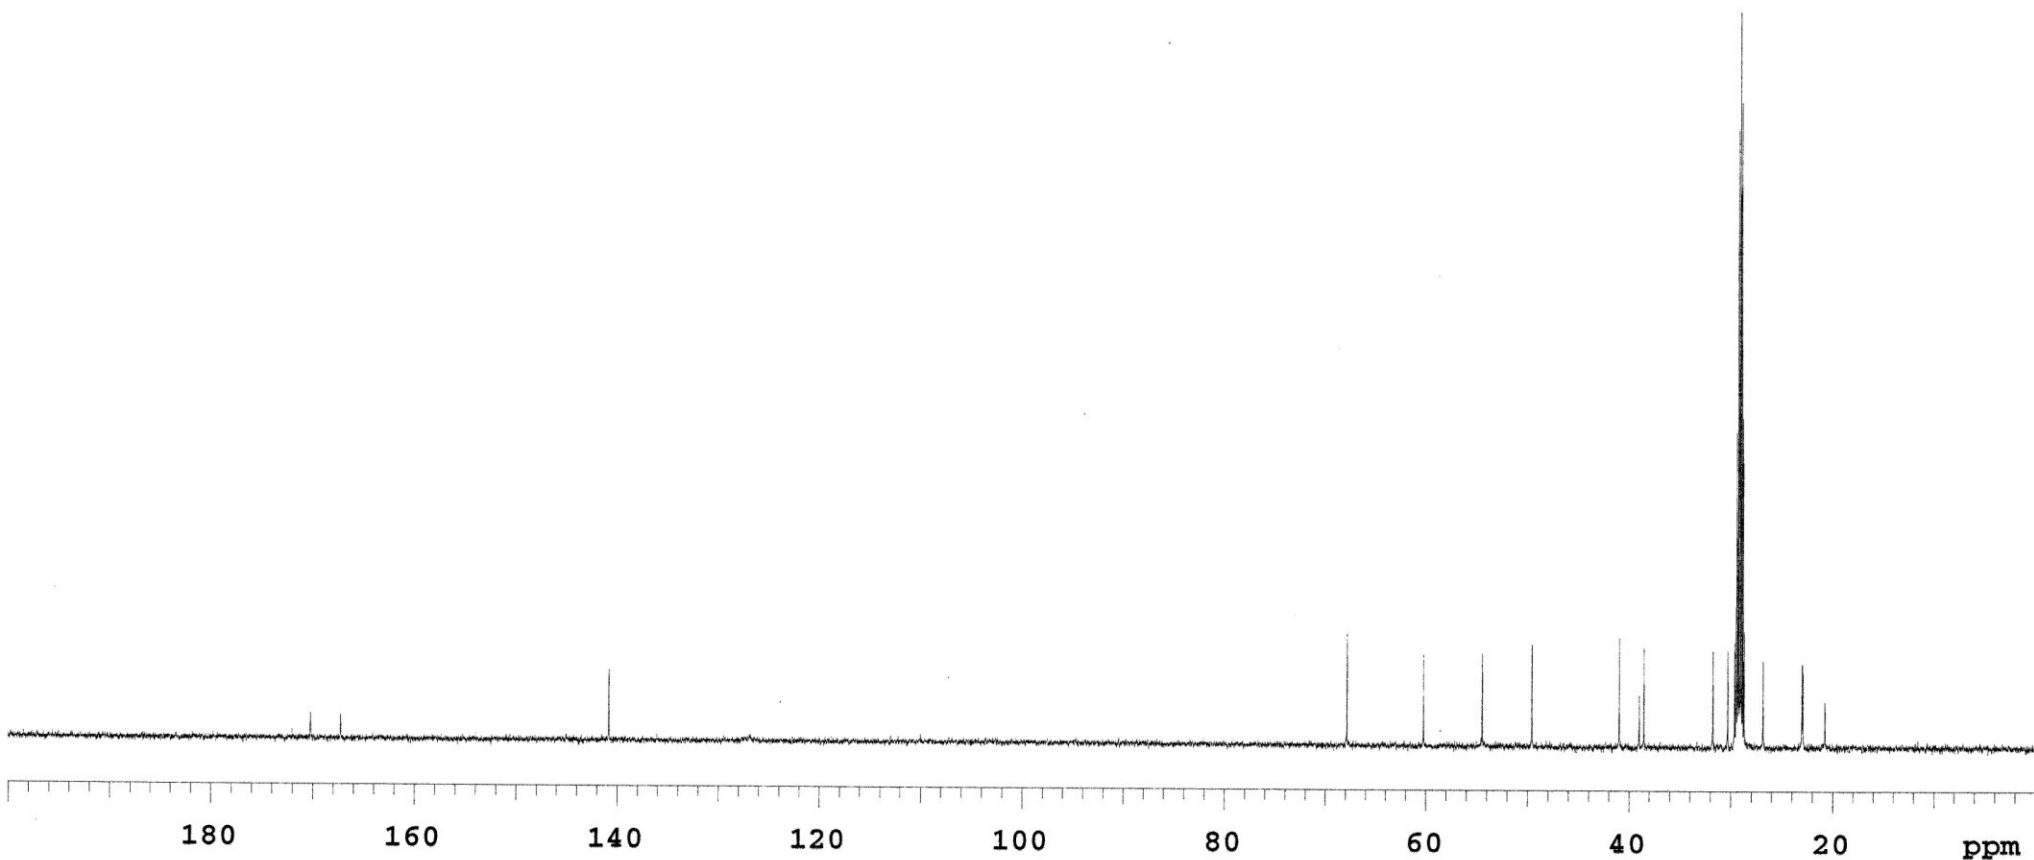

Pulse Sequence: s2pul  
exp1 s2pul

| SAMPLE      |             | DEC. & VT  |          |
|-------------|-------------|------------|----------|
| date        | Oct 19 2010 | dfrq       | 499.435  |
| solvent     | Acetone     | dn         | H1       |
| file        | exp         | dpwr       | 25       |
| ACQUISITION |             | dof        |          |
| sfrq        | 499.435     | dm         | nnn      |
| tn          | H1          | dmm        | c        |
| at          | 4.096       | dmf        | 200      |
| np          | 65536       | dseq       |          |
| sw          | 8000.0      | dres       | 1.0      |
| fb          | 4000        | homo       | n        |
| bs          | 4           | DEC2       |          |
| tpwr        | 62          | dfrq2      | 0        |
| pw          | 6.6         | dn2        |          |
| d1          | 0           | dpwr2      | 1        |
| tof         | 0           | dof2       | 0        |
| nt          | 4           | dm2        | n        |
| ct          | 4           | dmm2       | c        |
| alock       |             | dmf2       | 200      |
| gain        | not used    | dseq2      |          |
| FLAGS       |             | dres2      |          |
| il          | n           | homo2      | n        |
| in          | n           | PROCESSING |          |
| dp          | y           | lb         | 0.30     |
| hs          | nn          | wtfile     |          |
| DISPLAY     |             | proc       |          |
| sp          | -249.8      | fn         | not used |
| wp          | 4994.1      | math       | f        |
| vs          | 151         |            |          |
| sc          | 0           | werr       |          |
| wc          | 250         | wexp       |          |
| hzmm        | 19.98       | wbs        |          |
| is          | 33.57       | wnt        |          |
| rfl         | 2534.4      |            |          |
| rfp         | 1023.8      |            |          |
| th          | 9           |            |          |
| ins         | 1.000       |            |          |
| nm          | ph          |            |          |

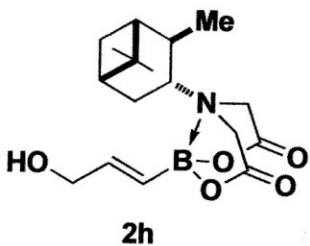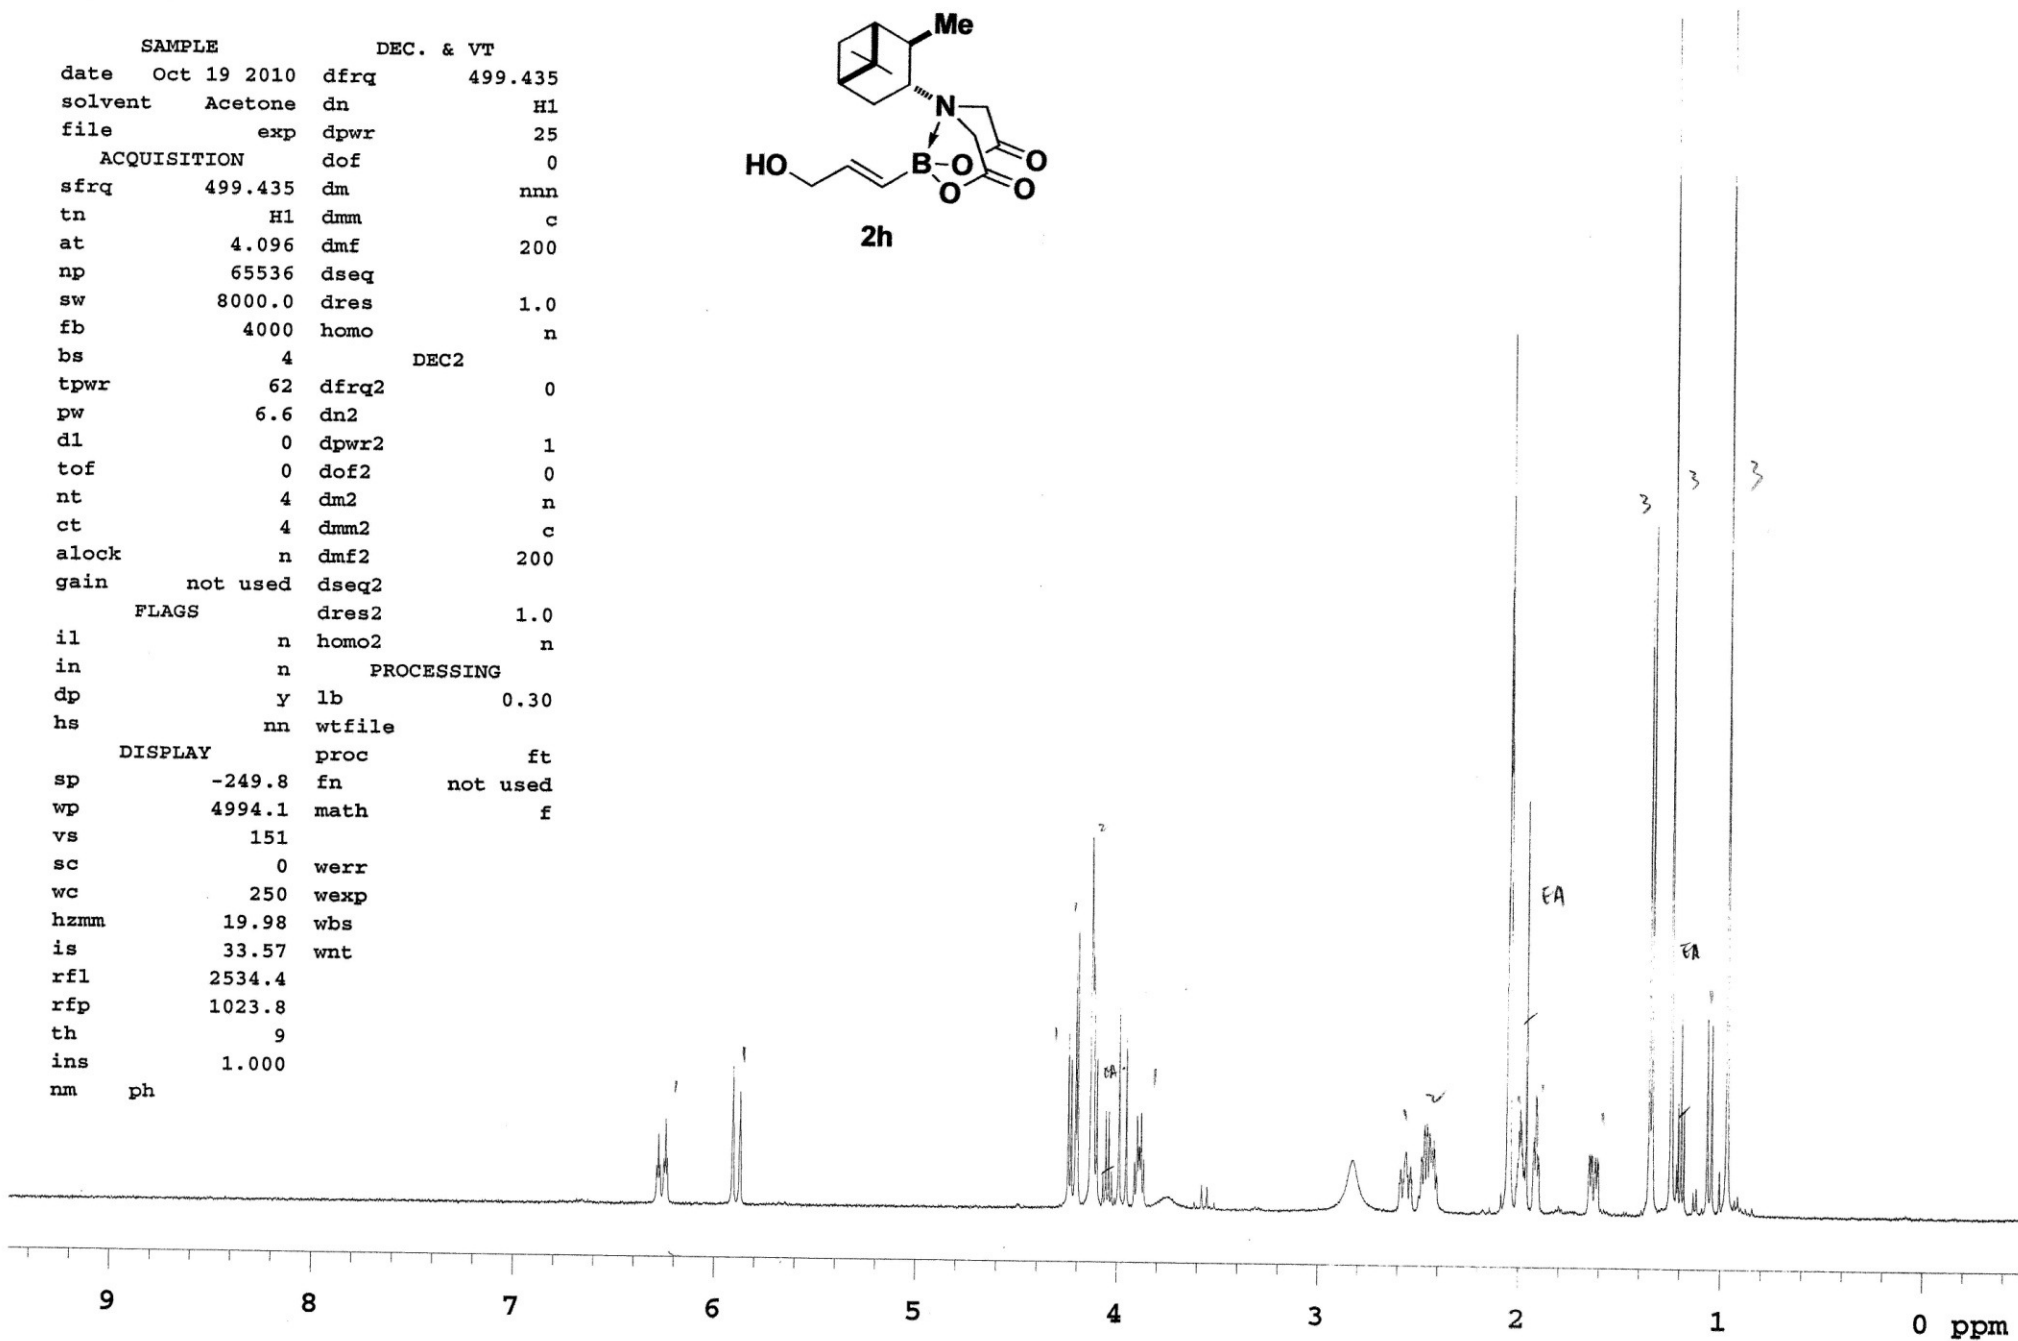



Pulse Sequence: s2pul

Solvent: Acetone  
Ambient temperature  
User: 1-14-87  
INOVA-500 "vnr500"

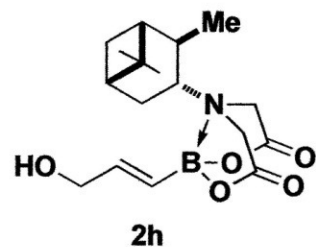

Relax. delay 1.000 sec  
Pulse 45.0 degrees  
Acq. time 1.024 sec  
Width 32000.0 Hz  
352 repetitions  
OBSERVE C13, 125.5822933 MHz  
DECOUPLE H1, 499.4341558 MHz  
Power 48 dB  
continuously on  
WALTZ-16 modulated  
DATA PROCESSING  
Line broadening 1.0 Hz  
FT size 65536  
Total time 5 hr, 38 min, 51 sec

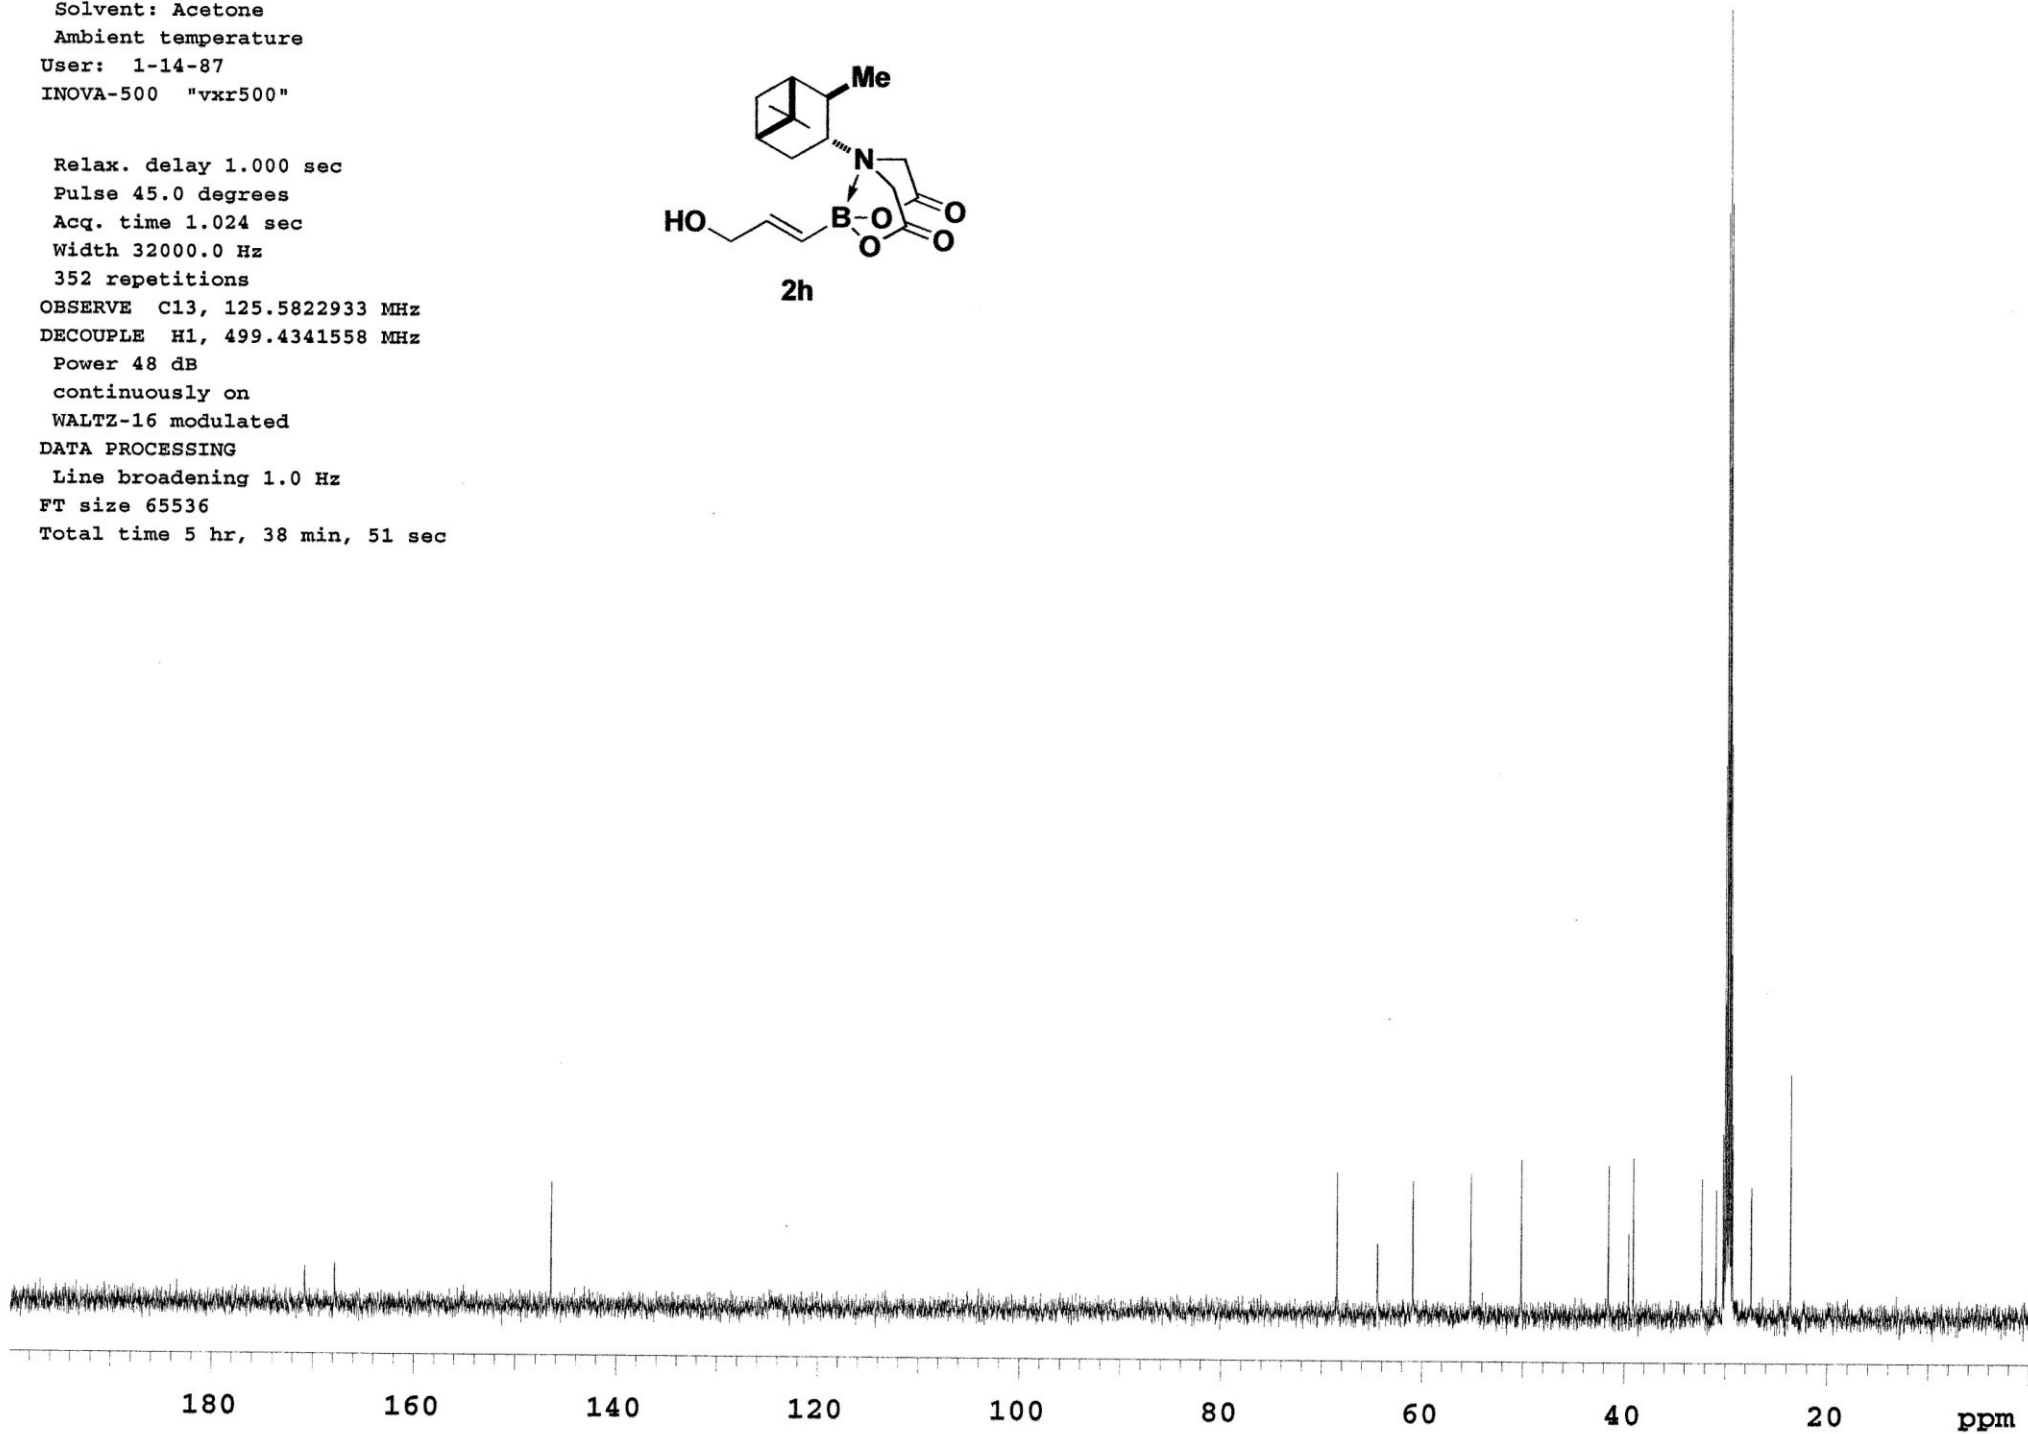

Pulse Sequence: s2pul  
exp1 s2pul

| SAMPLE      |             | DEC. & VT  |          |
|-------------|-------------|------------|----------|
| date        | Oct 19 2010 | dfrq       | 499.435  |
| solvent     | Acetone     | dn         | H1       |
| file        | exp         | dpwr       | 25       |
| ACQUISITION |             | dof        | 0        |
| sfrq        | 499.435     | dm         | nnn      |
| tn          | H1          | dmm        | c        |
| at          | 4.096       | dmf        | 200      |
| np          | 65536       | dseq       |          |
| sw          | 8000.0      | dres       | 1.0      |
| fb          | 4000        | homo       | n        |
| bs          | 4           | DEC2       |          |
| tpwr        | 62          | dfrq2      | 0        |
| pw          | 6.6         | dn2        |          |
| d1          | 0           | dpwr2      | 1        |
| tof         | 0           | dof2       | 0        |
| nt          | 4           | dm2        | n        |
| ct          | 4           | dmm2       | c        |
| alock       | n           | dmf2       | 200      |
| gain        | not used    | dseq2      |          |
| FLAGS       |             | dres2      | 1.0      |
| il          | n           | homo2      | n        |
| in          | n           | PROCESSING |          |
| dp          | y           | lb         | 0.30     |
| hs          | nn          | wfile      |          |
| DISPLAY     |             | proc       | ft       |
| sp          | -249.8      | fn         | not used |
| wp          | 4994.1      | math       | f        |
| vs          | 162         |            |          |
| sc          | 0           | werr       |          |
| wc          | 250         | wexp       |          |
| hzmm        | 19.98       | wbs        |          |
| is          | 33.57       | wnt        |          |
| rfl         | 2534.4      |            |          |
| rfp         | 1023.8      |            |          |
| th          | 7           |            |          |
| ins         | 100.000     |            |          |
| nm          | ph          |            |          |

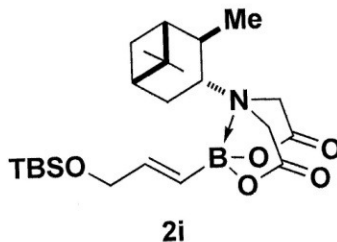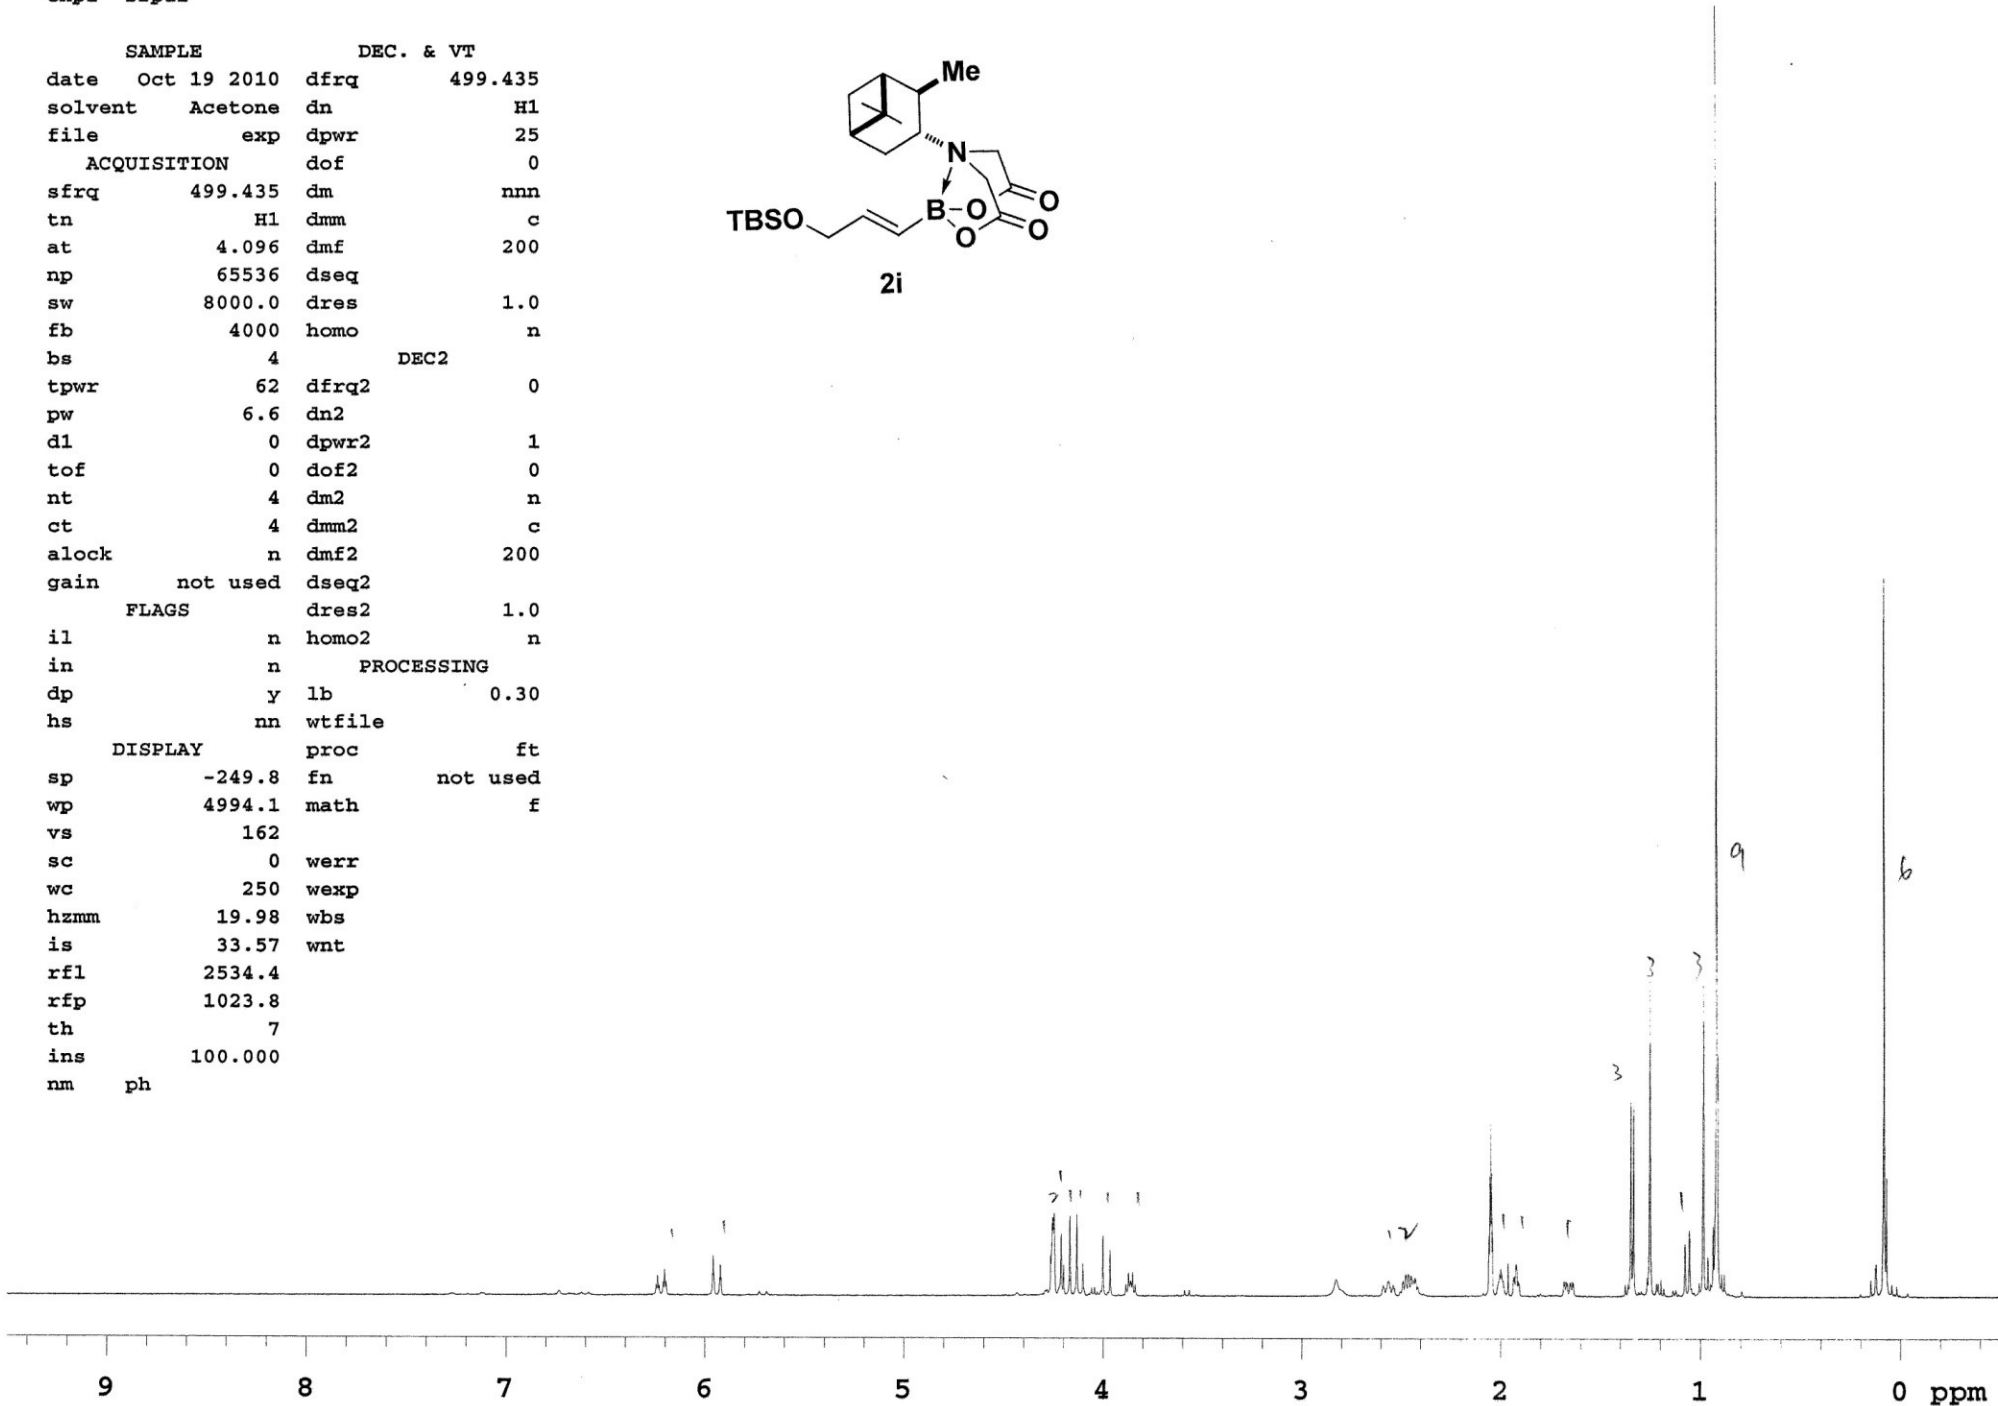

Pulse Sequence: s2pul

Solvent: CDCl3

Ambient temperature

User: 1-14-87

INOVA-500 "vvr500"

Relax. delay 1.000 sec

Pulse 45.0 degrees

Acq. time 1.024 sec

Width 32000.0 Hz

656 repetitions

OBSERVE C13, 125.5817531 MHz

DECOUPLE H1, 499.4315638 MHz

Power 48 dB

continuously on

WALTZ-16 modulated

DATA PROCESSING

Line broadening 1.0 Hz

FT size 65536

Total time 5 hr, 38 min, 51 sec

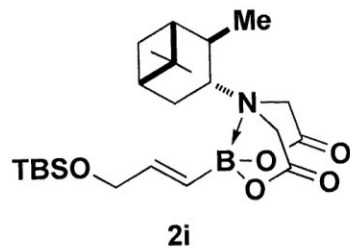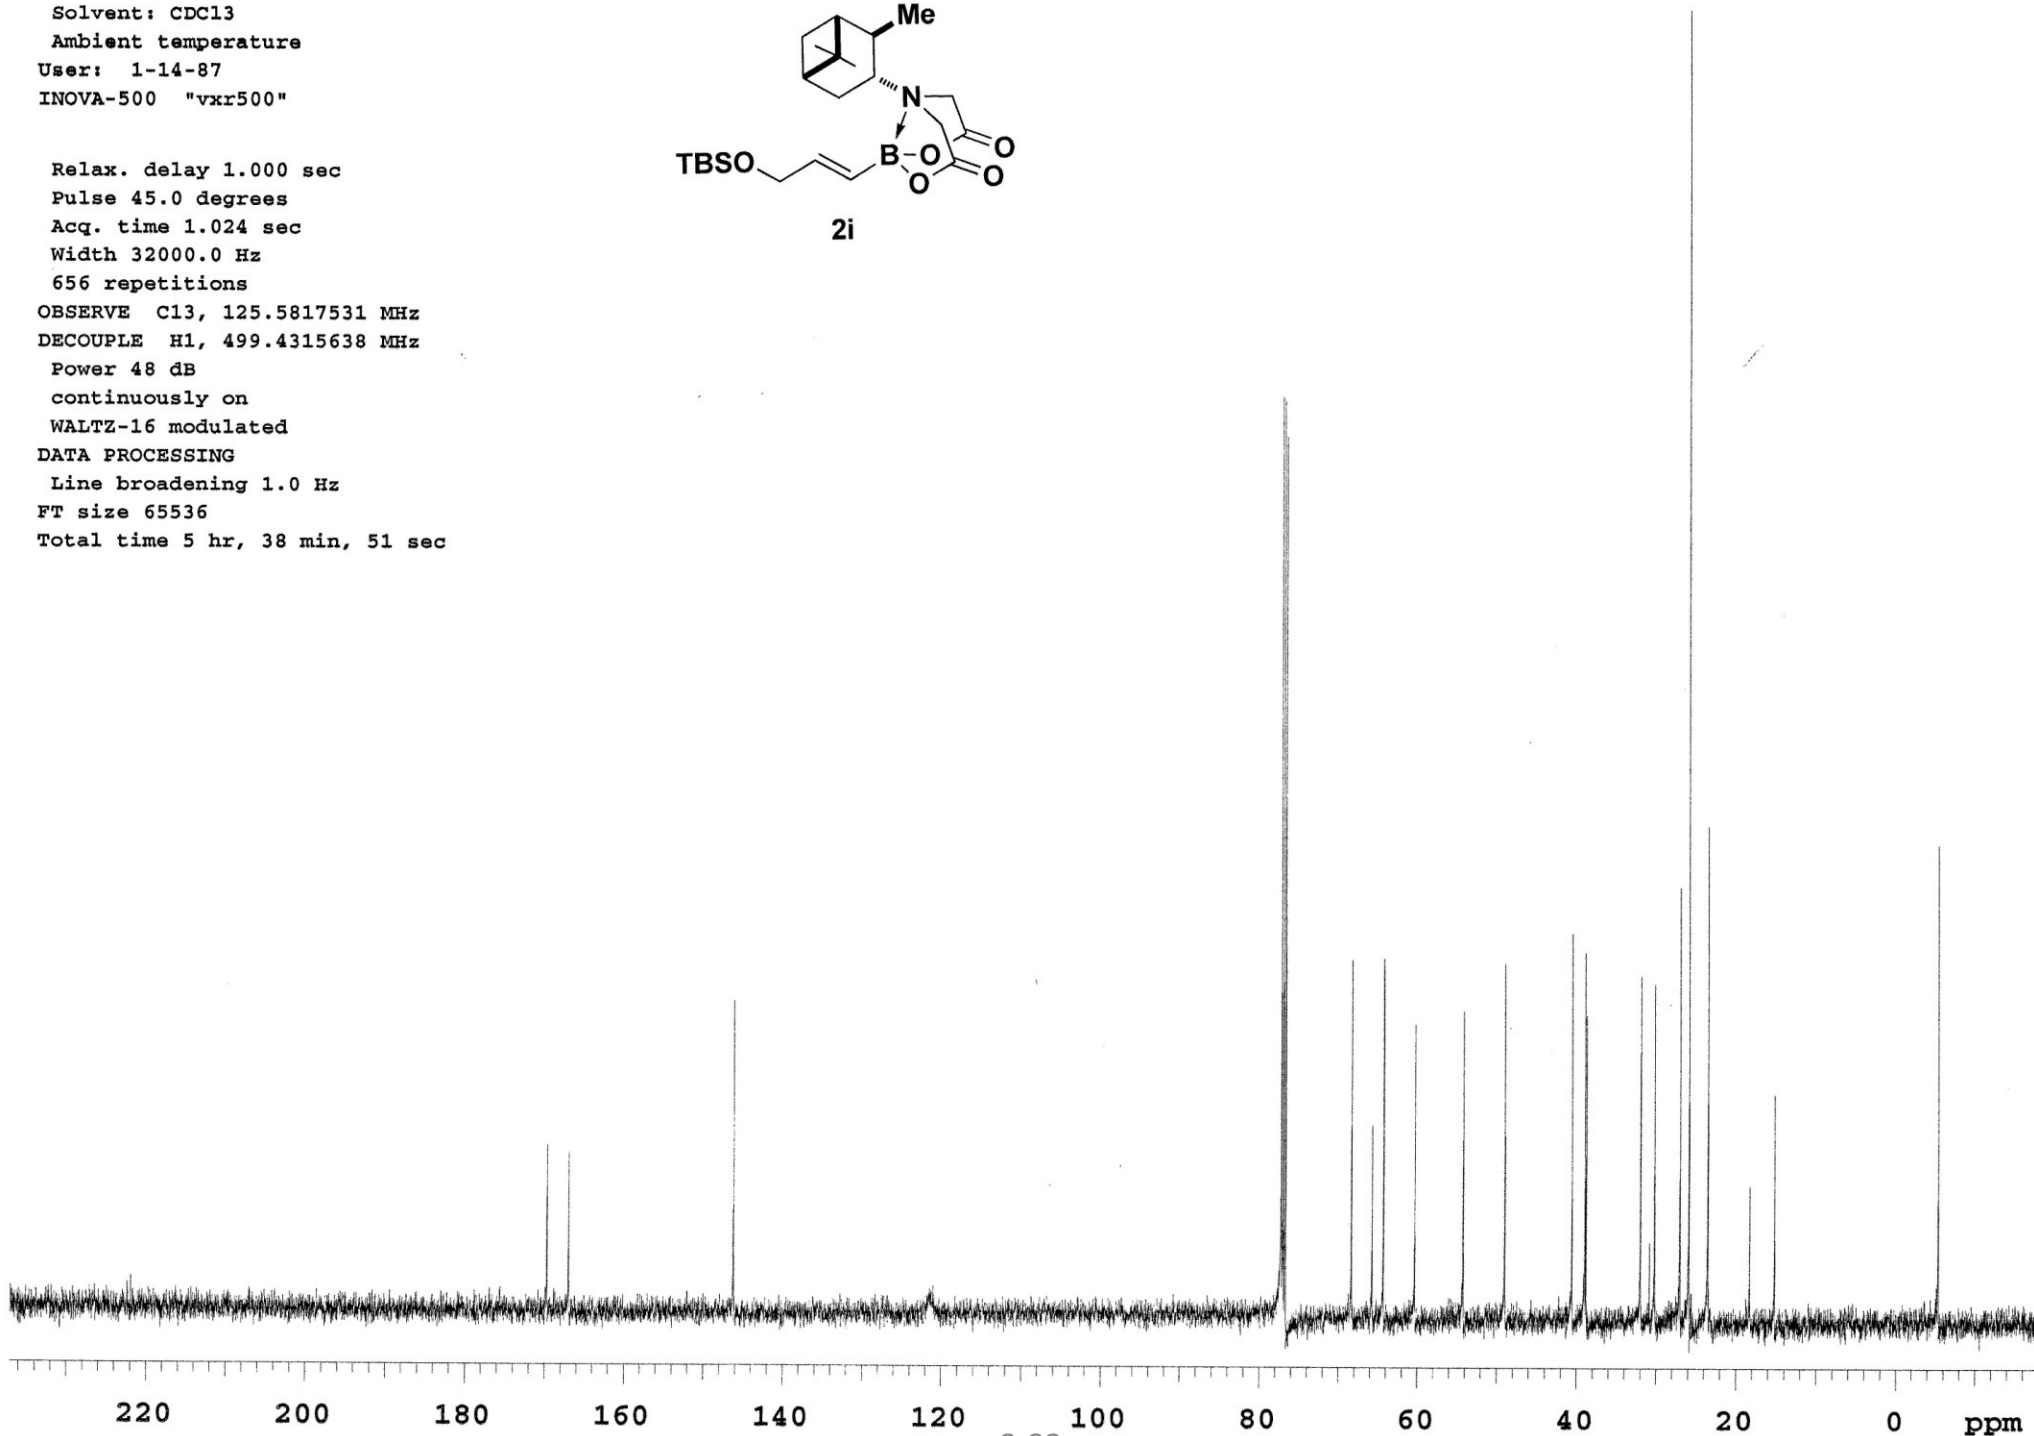

Pulse Sequence: s2pul

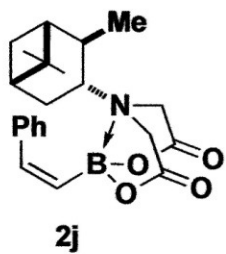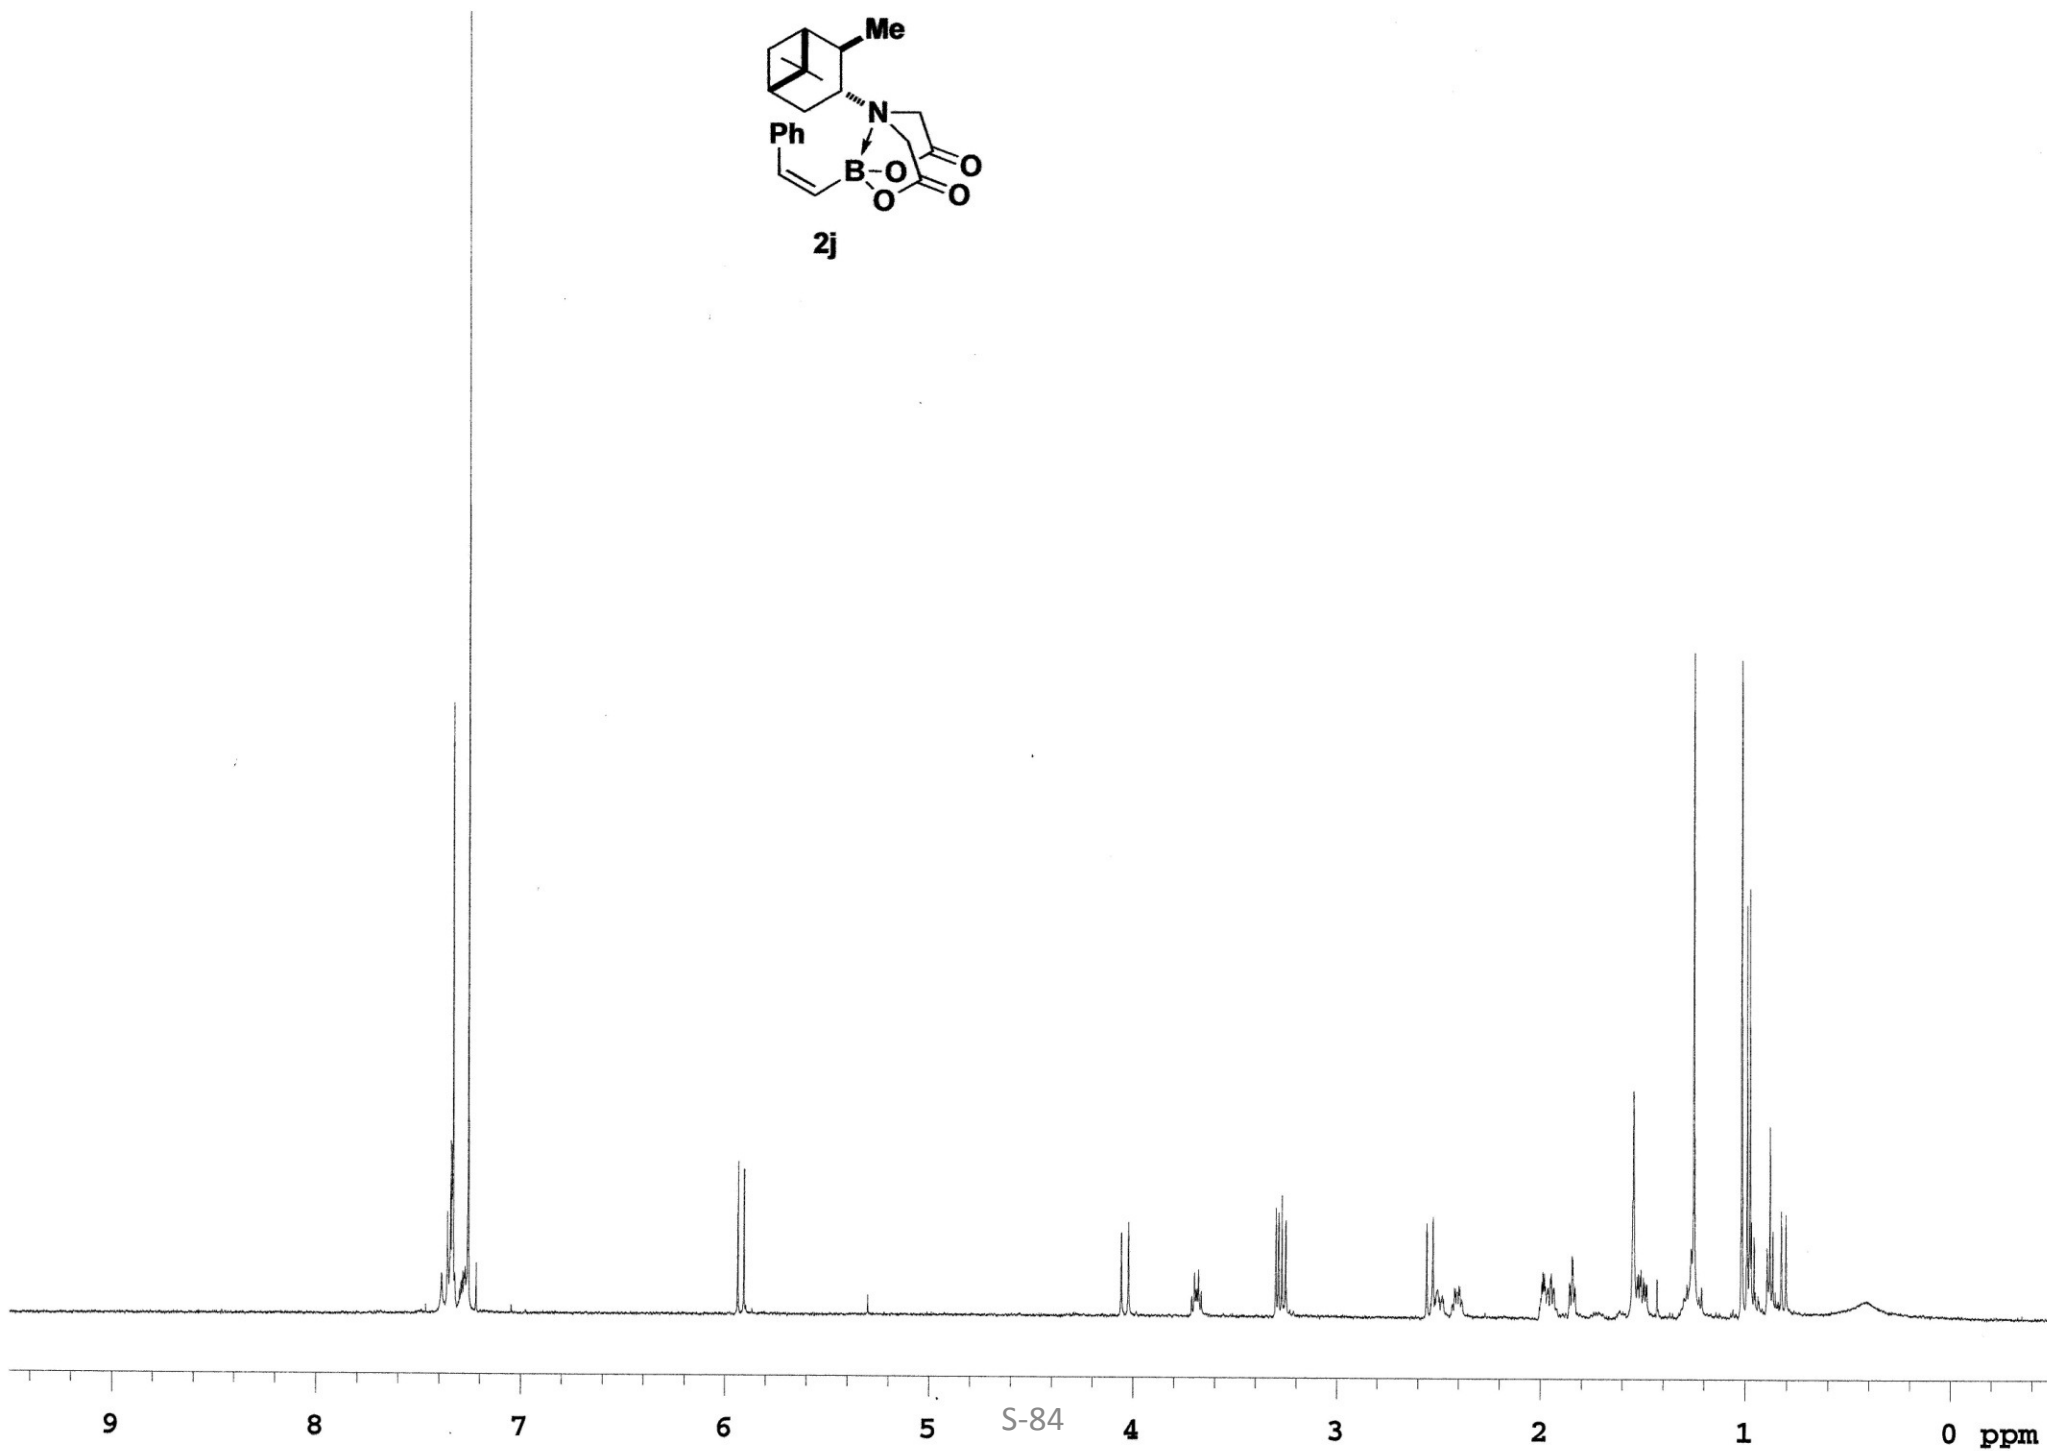

Pulse Sequence: s2pul

Solvent: CDC13

Ambient temperature

User: 1-14-87

INOVA-500 "vxr500"

Relax. delay 1.000 sec

Pulse 45.0 degrees

Acq. time 1.024 sec

Width 32000.0 Hz

272 repetitions

OBSERVE C13, 125.5817531 MHz

DECOUPLE H1, 499.4315638 MHz

Power 48 dB

continuously on

WALTZ-16 modulated

DATA PROCESSING

Line broadening 1.0 Hz

FT size 65536

Total time 33 min, 54 sec

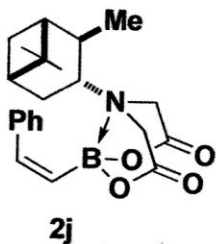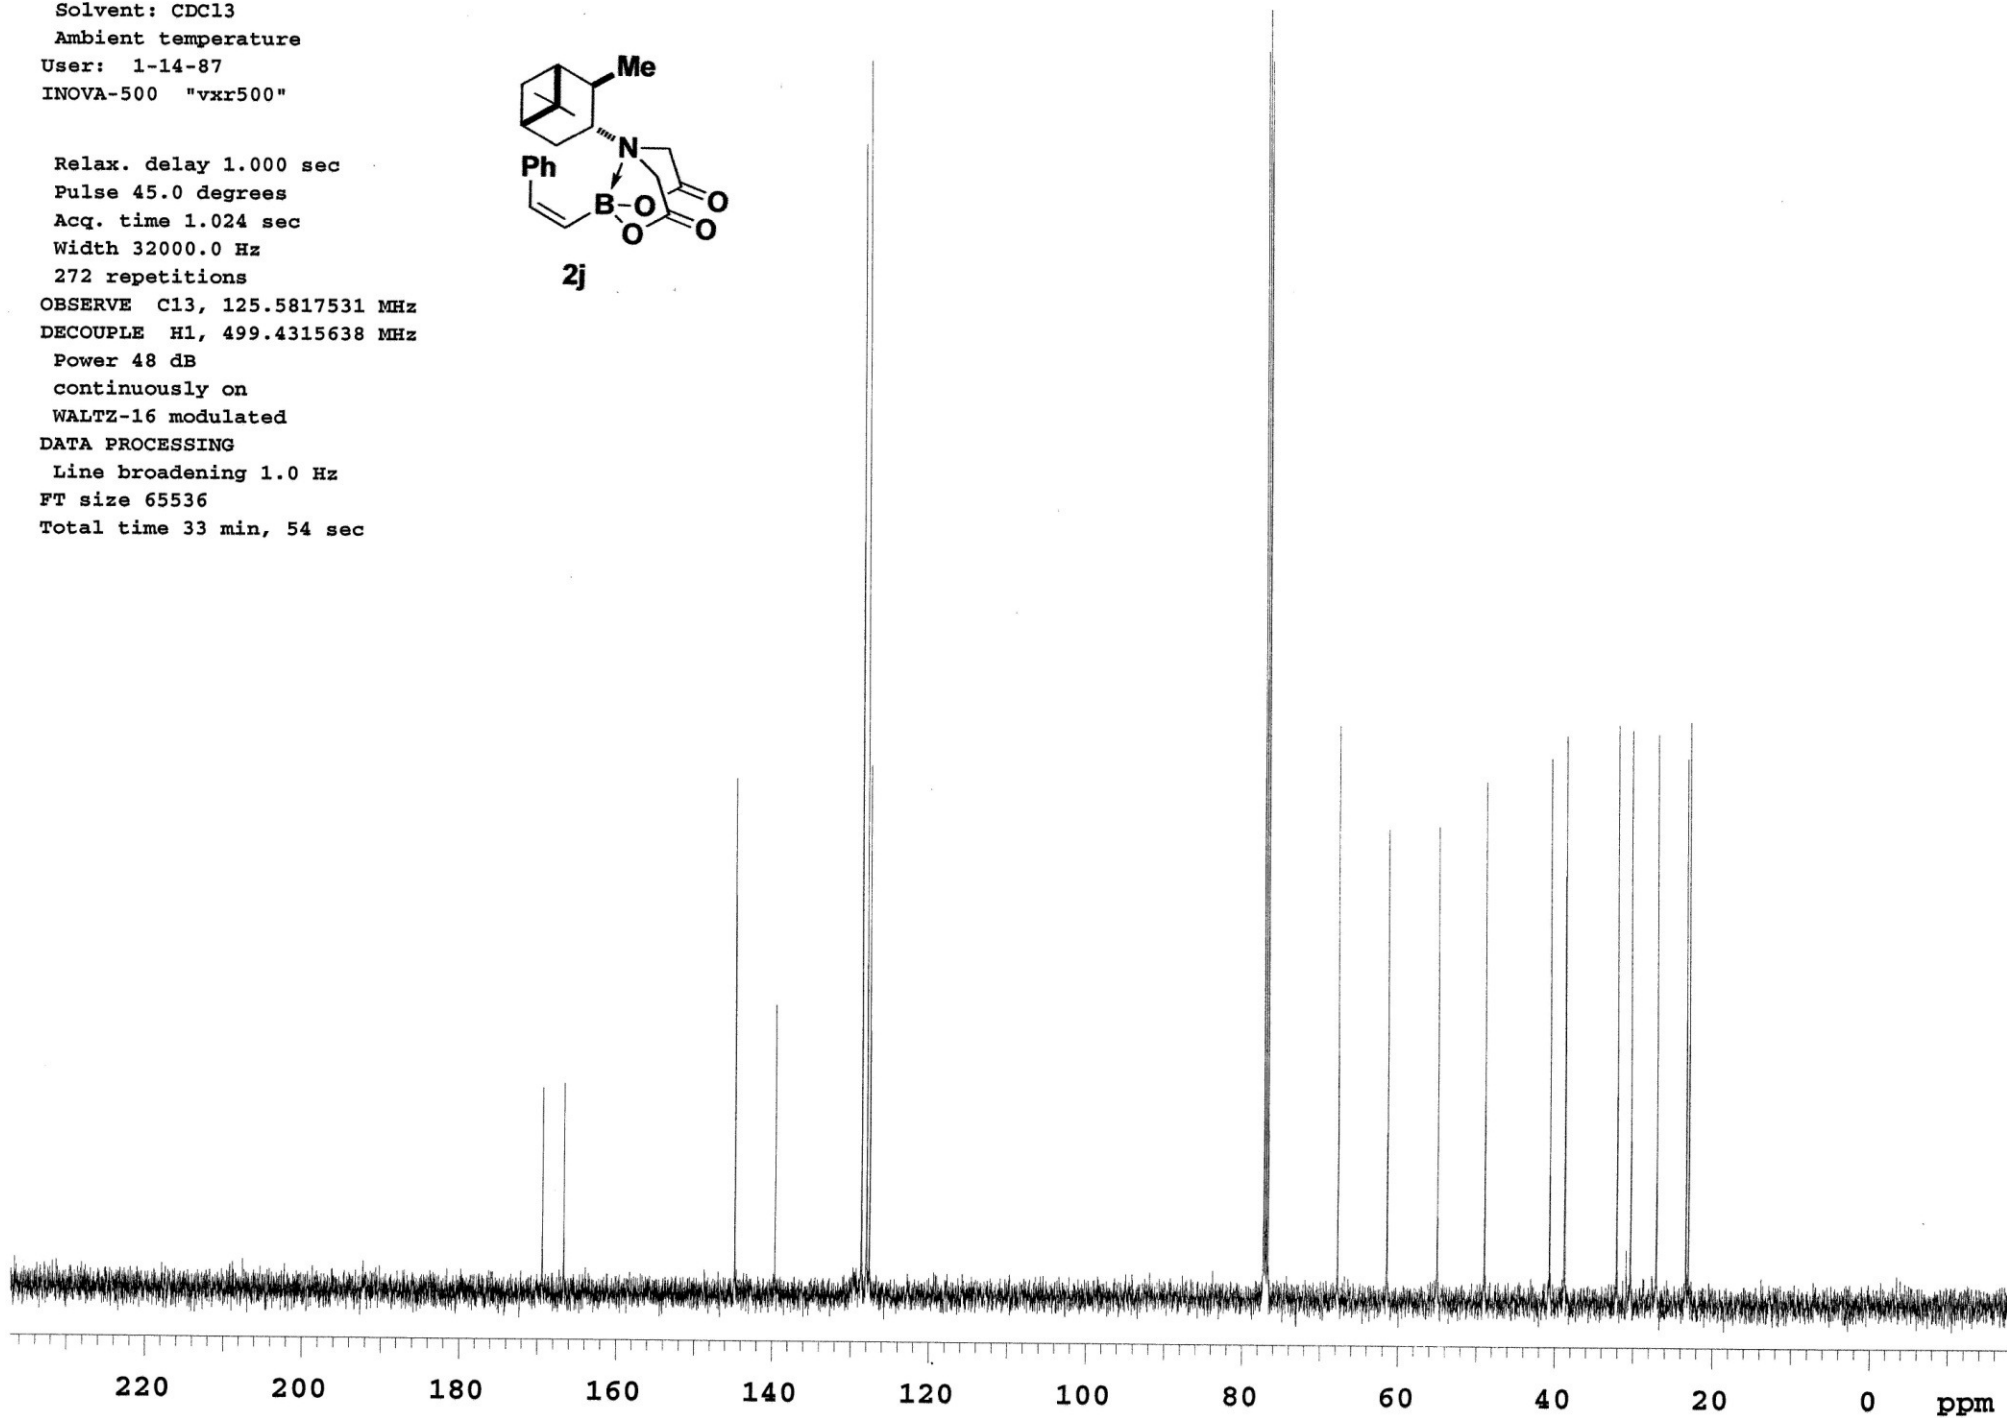

Pulse Sequence: s2pul

Solvent: CDCl3

Ambient temperature

INOVA-500 "u500"

Pulse 61.6 degrees

Acq. time 4.665 sec

Width 7024.9 Hz

4 repetitions

OBSERVE H1, 499.6906574 MHz

DATA PROCESSING

Line broadening 0.3 Hz

FT size 65536

Total time 0 min, 18 sec

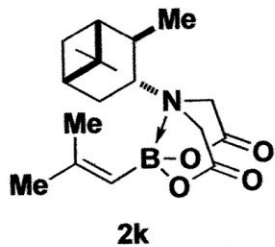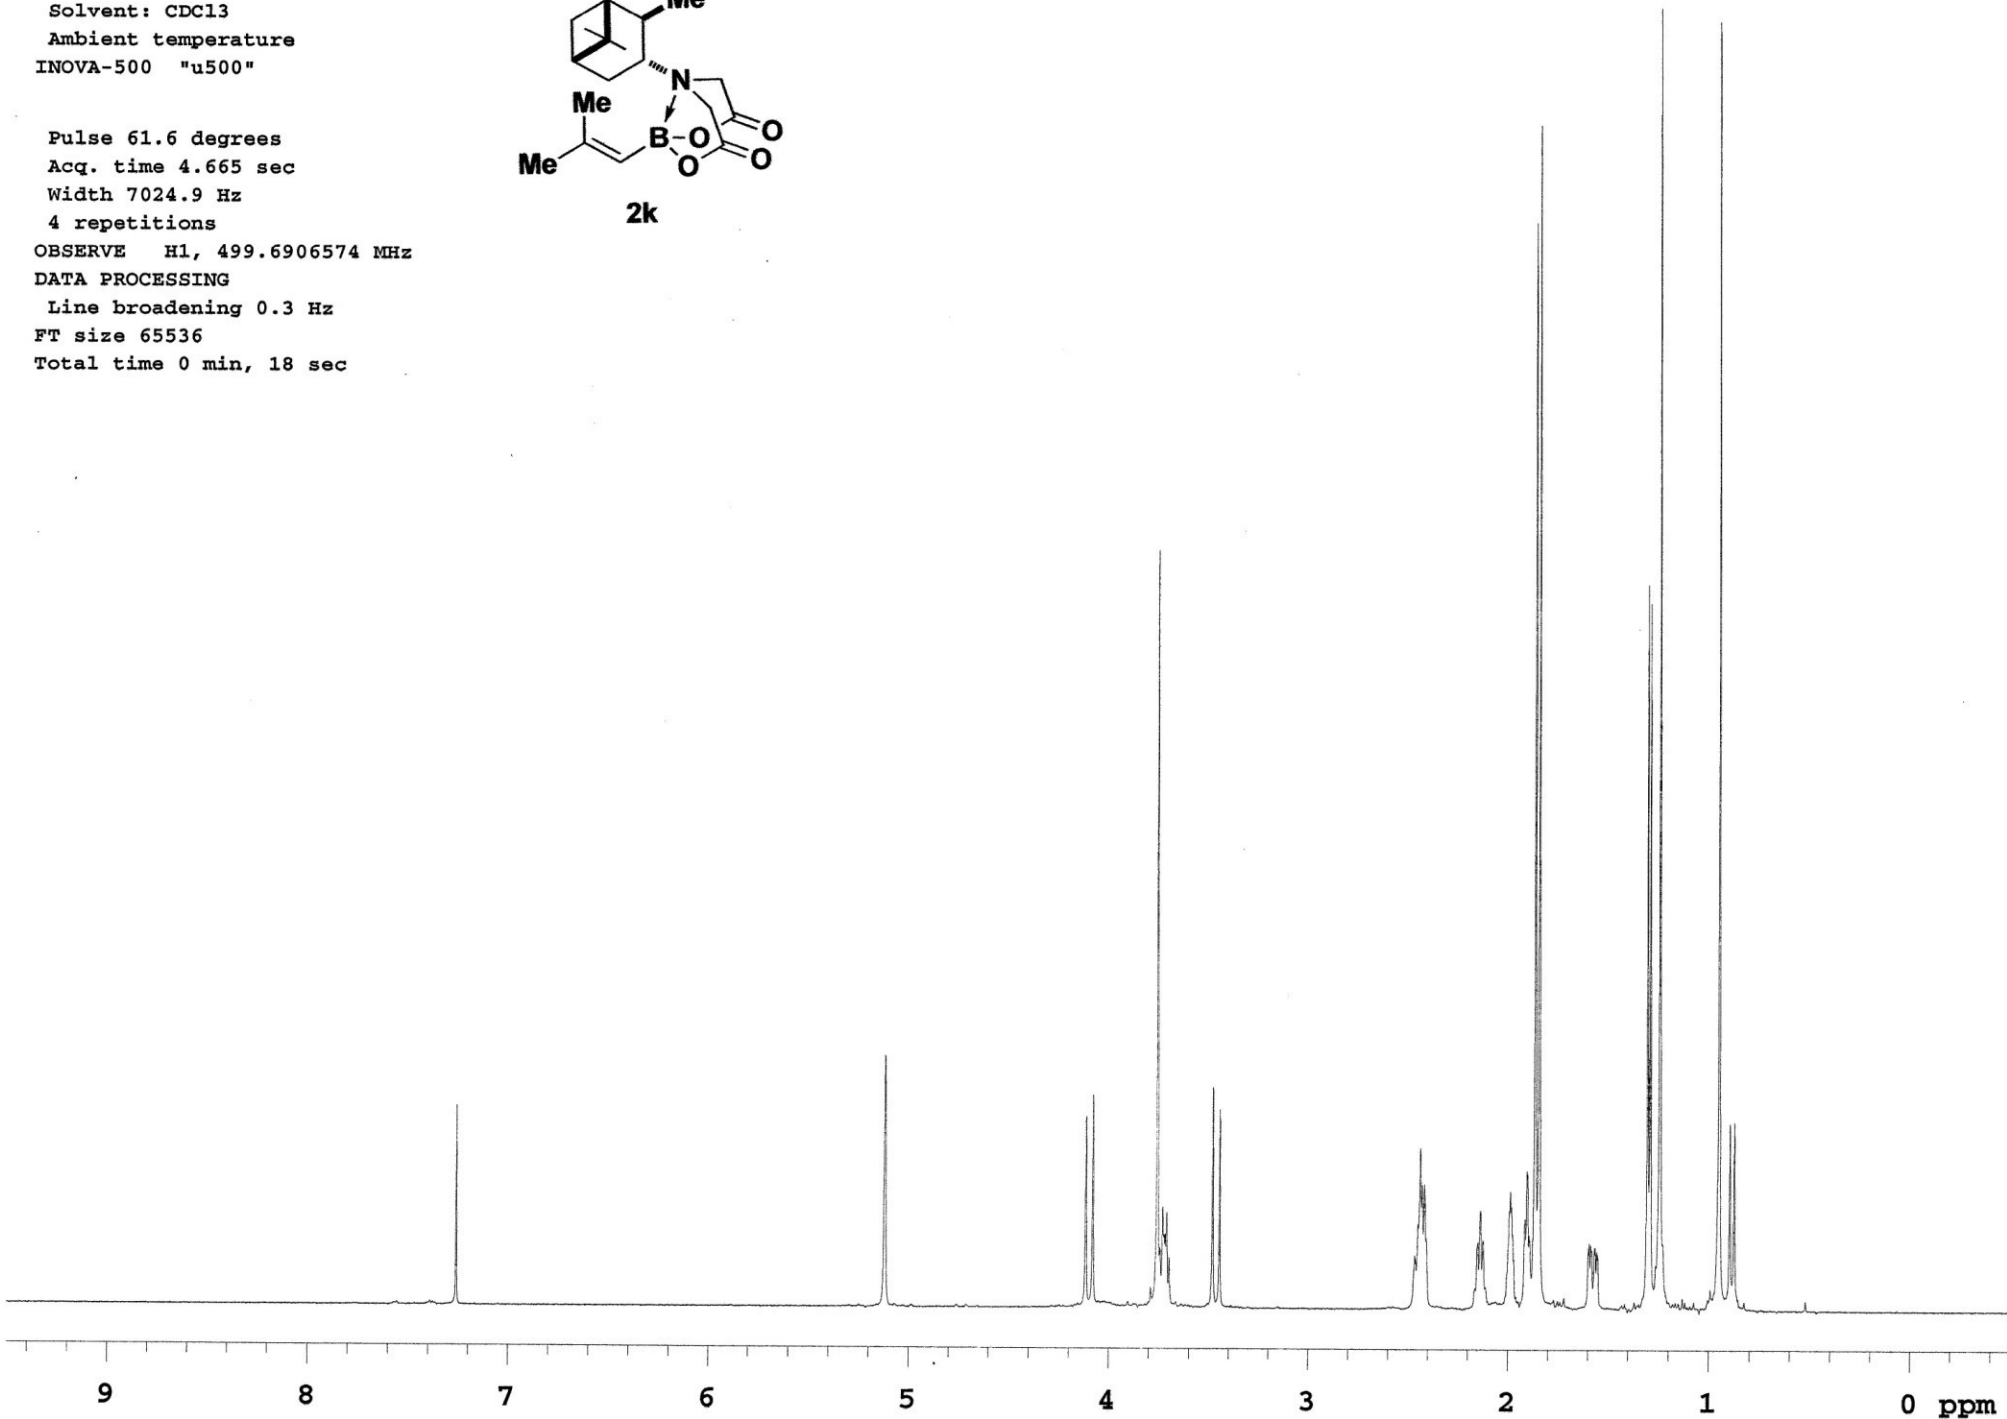

C13\_041811\_JL\_234A

Pulse Sequence: s2pul

Solvent: CDC13

Ambient temperature

User: 1-14-87

INOVA-500 "vkr500"

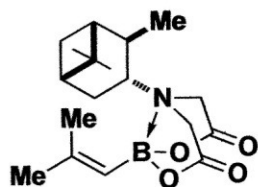

2k

Relax. delay 1.000 sec

Pulse 45.0 degrees

Acq. time 1.024 sec

Width 32000.0 Hz

192 repetitions

OBSERVE C13, 125.5817502 MHz

DECOUPLE H1, 499.4315638 MHz

Power 48 dB

continuously on

WALTZ-16 modulated

DATA PROCESSING

Line broadening 1.0 Hz

FT size 65536

Total time 33 min, 54 sec

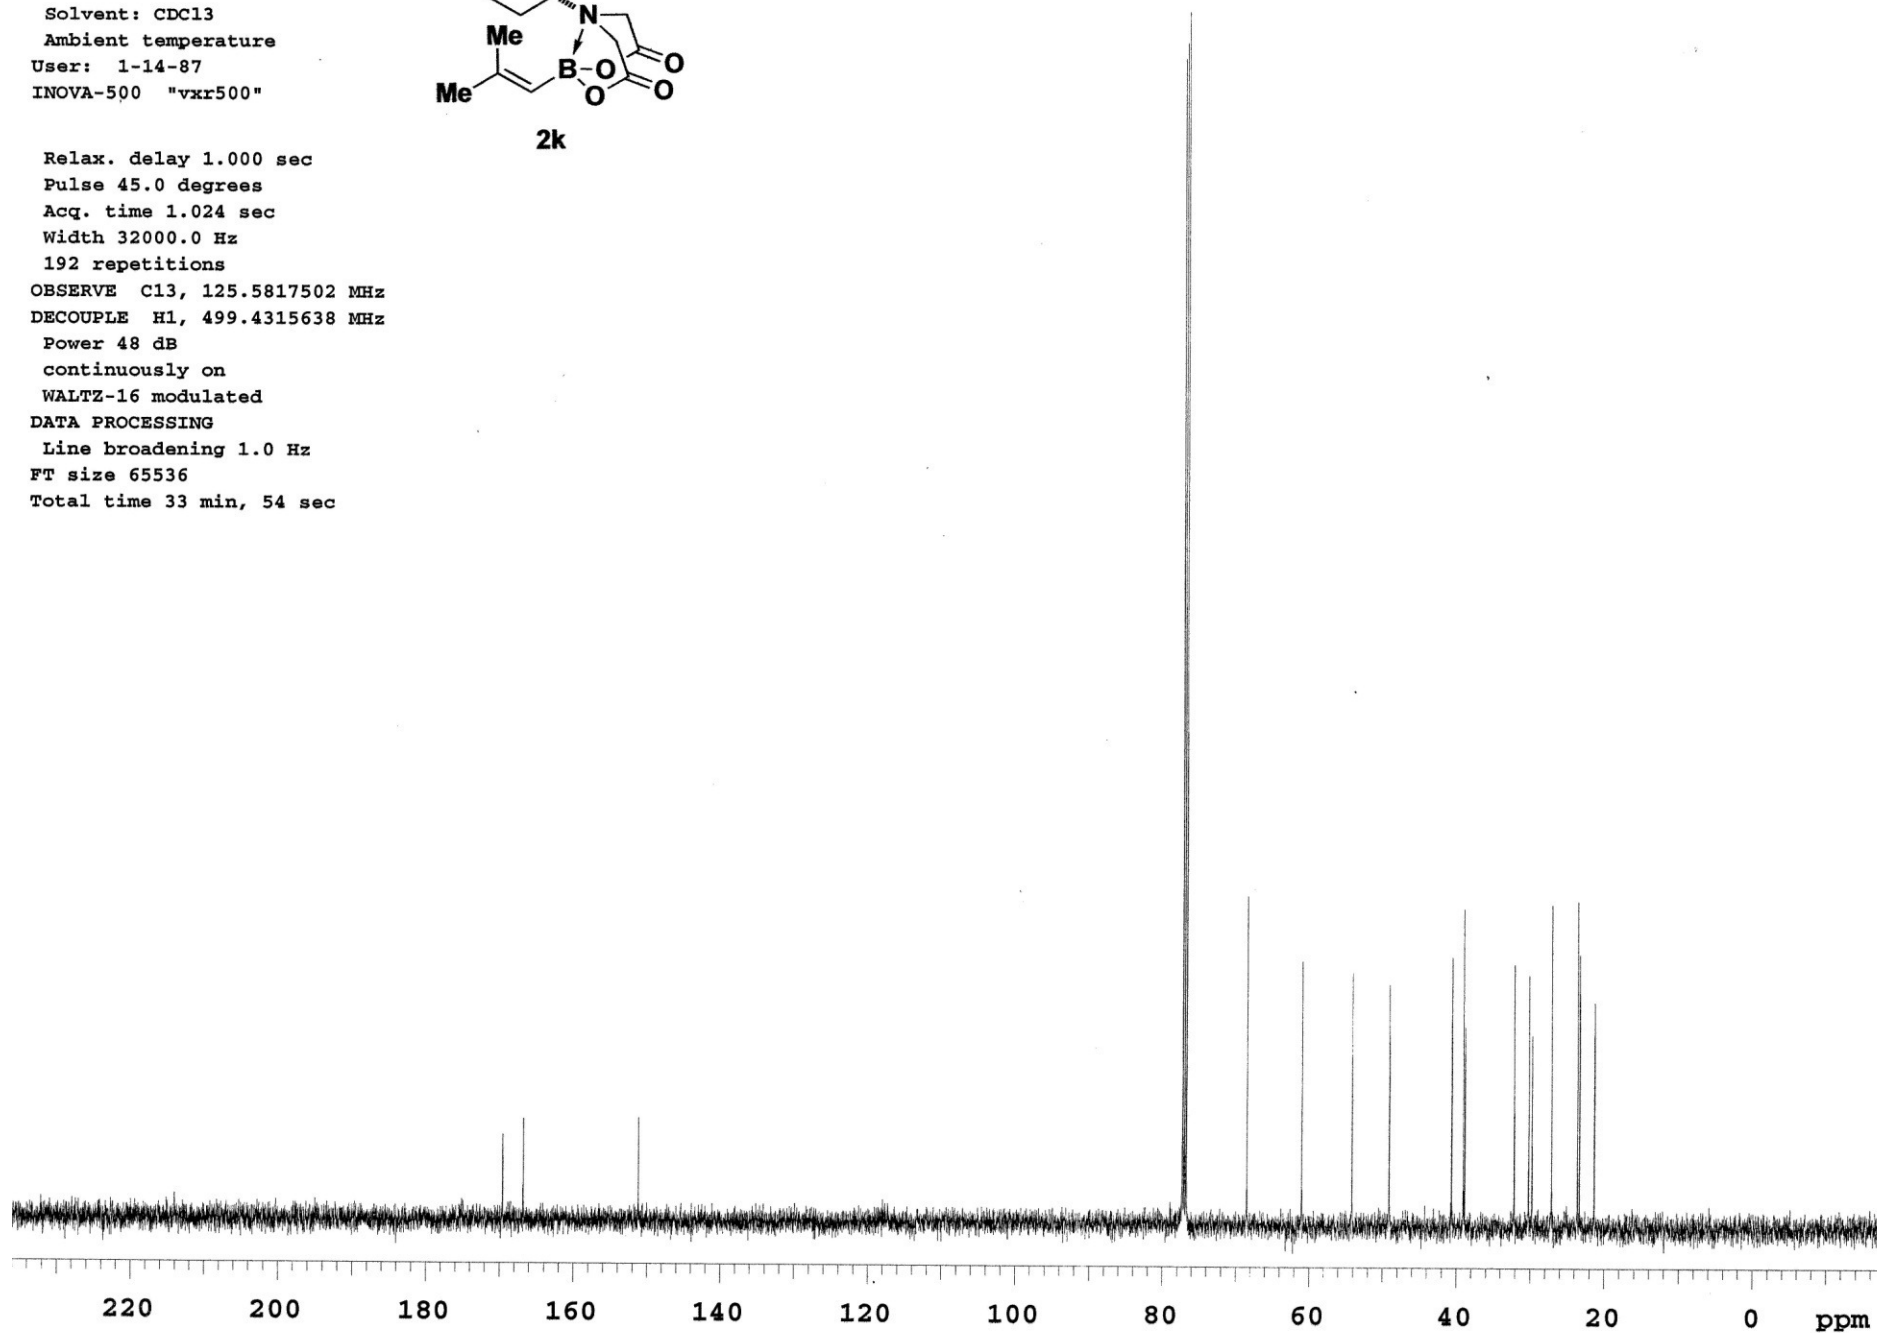

Pulse Sequence: s2pul

Solvent: CDCl3  
Ambient temperature  
INOVA-500 "u500"

Pulse 61.6 degrees  
Acq. time 4.665 sec  
Width 7024.9 Hz  
4 repetitions  
OBSERVE H1, 499.6906574 MHz  
DATA PROCESSING  
Line broadening 0.3 Hz  
FT size 65536  
Total time 0 min, 18 sec

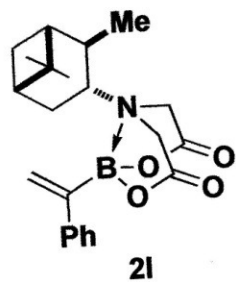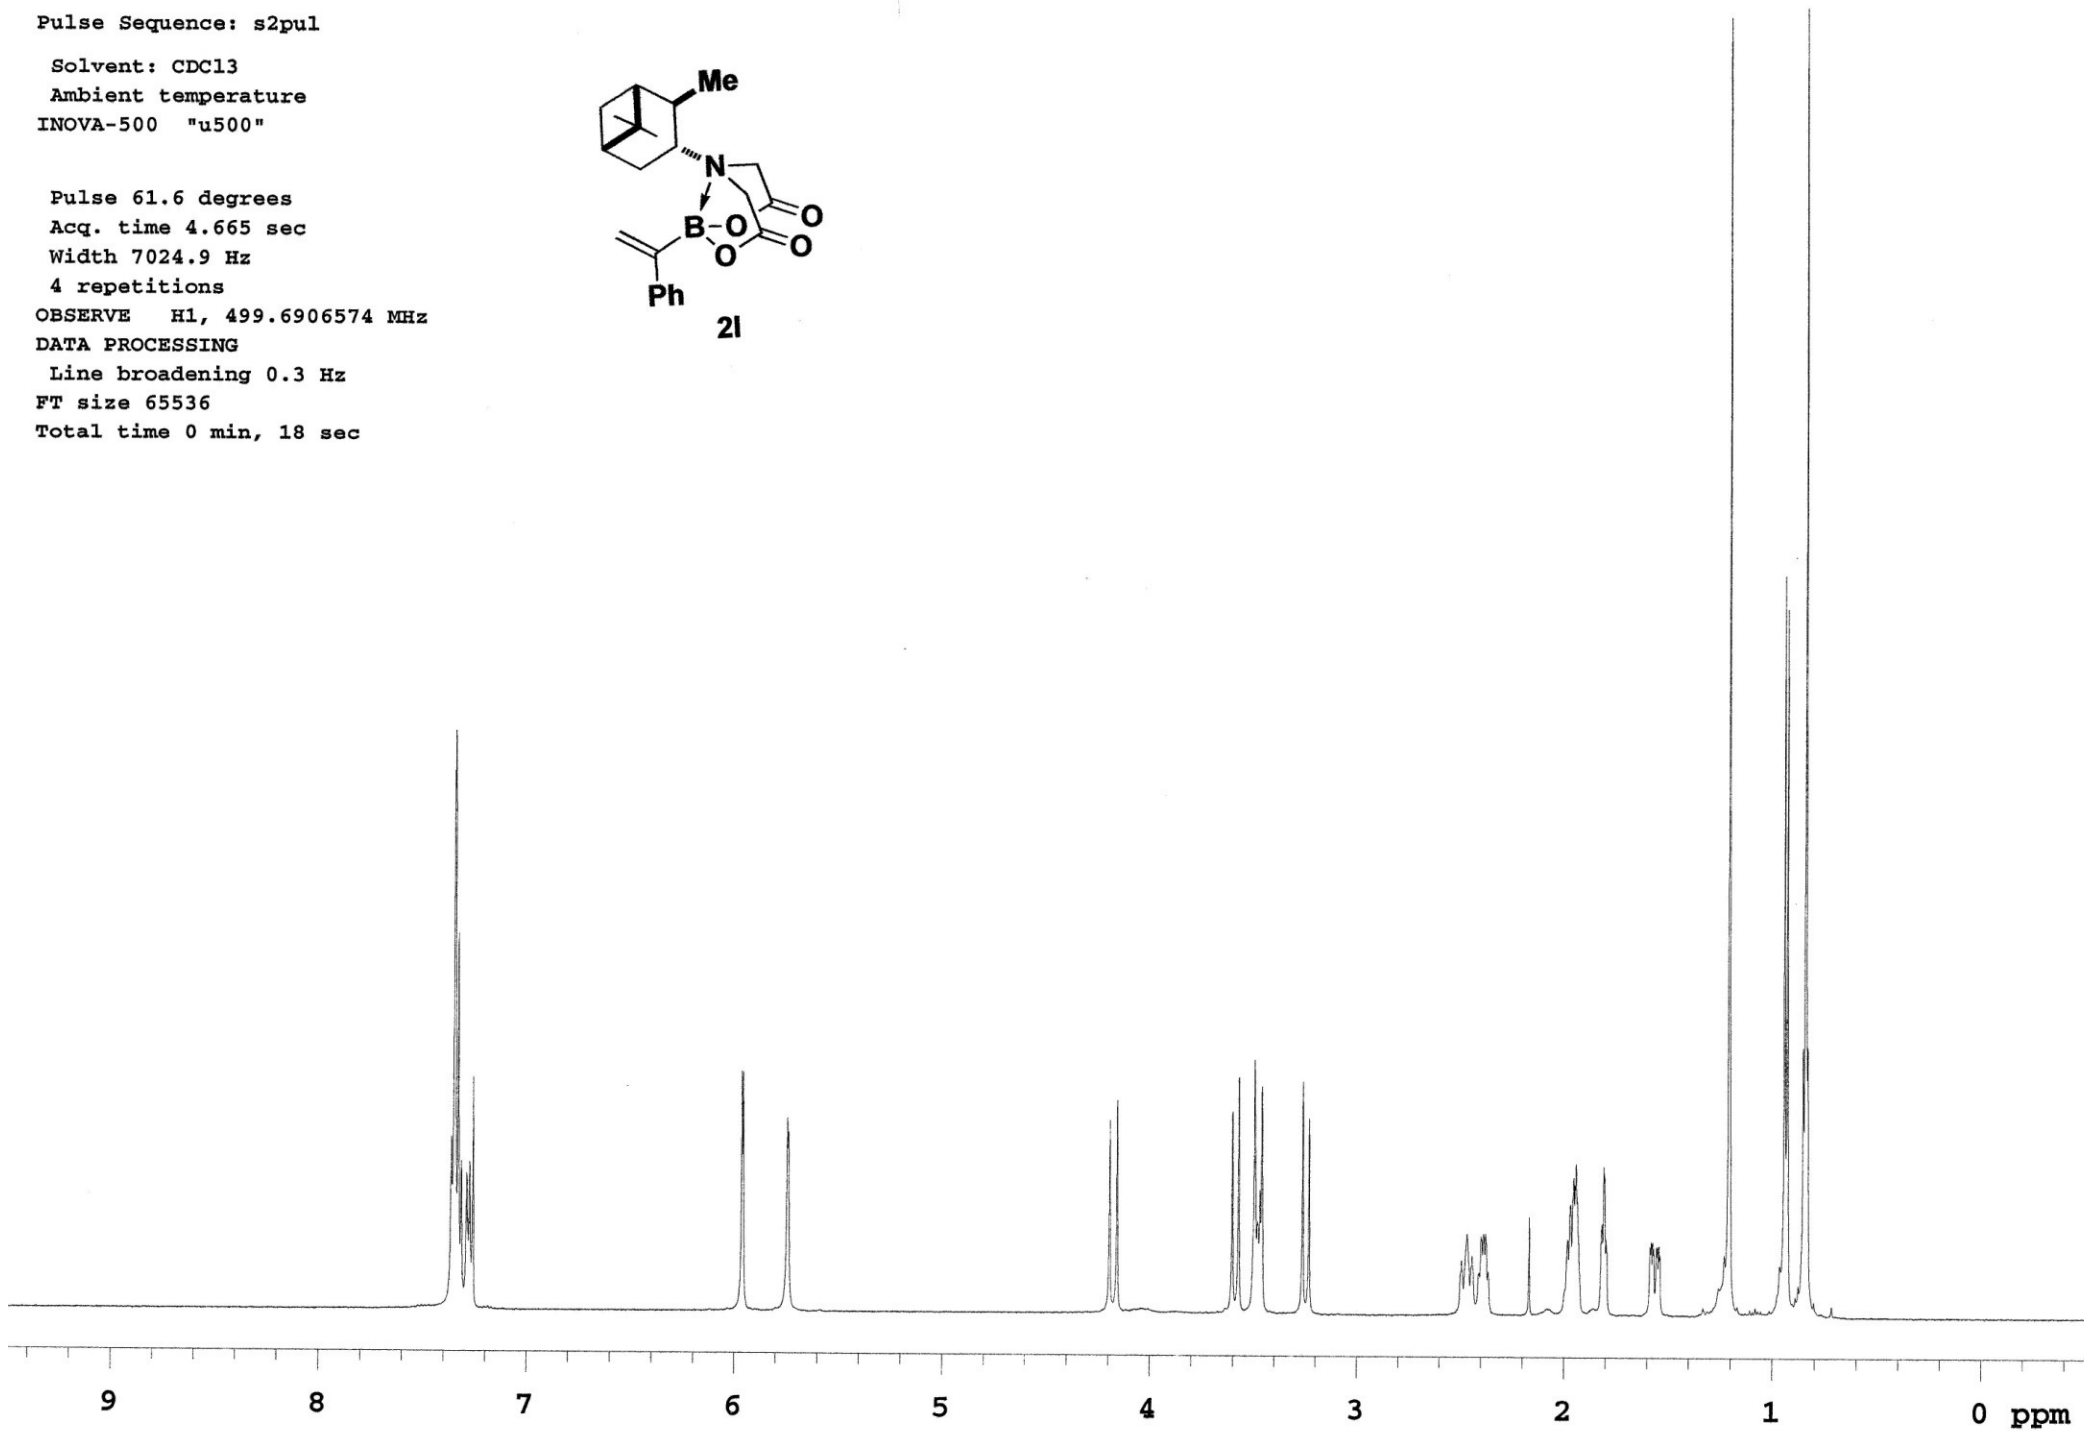



C13\_041811\_JL\_194B

Pulse Sequence: s2pul

Solvent: CDC13

Ambient temperature

User: 1-14-87

INOVA-500 "vvr500"

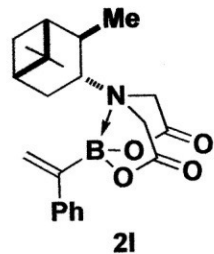

Relax. delay 1.000 sec

Pulse 45.0 degrees

Acq. time 1.024 sec

Width 32000.0 Hz

416 repetitions

OBSERVE C13, 125.5817502 MHz

DECOUPLE H1, 499.4315638 MHz

Power 48 dB

continuously on

WALTZ-16 modulated

DATA PROCESSING

Line broadening 1.0 Hz

FT size 65536

Total time 33 min, 54 sec

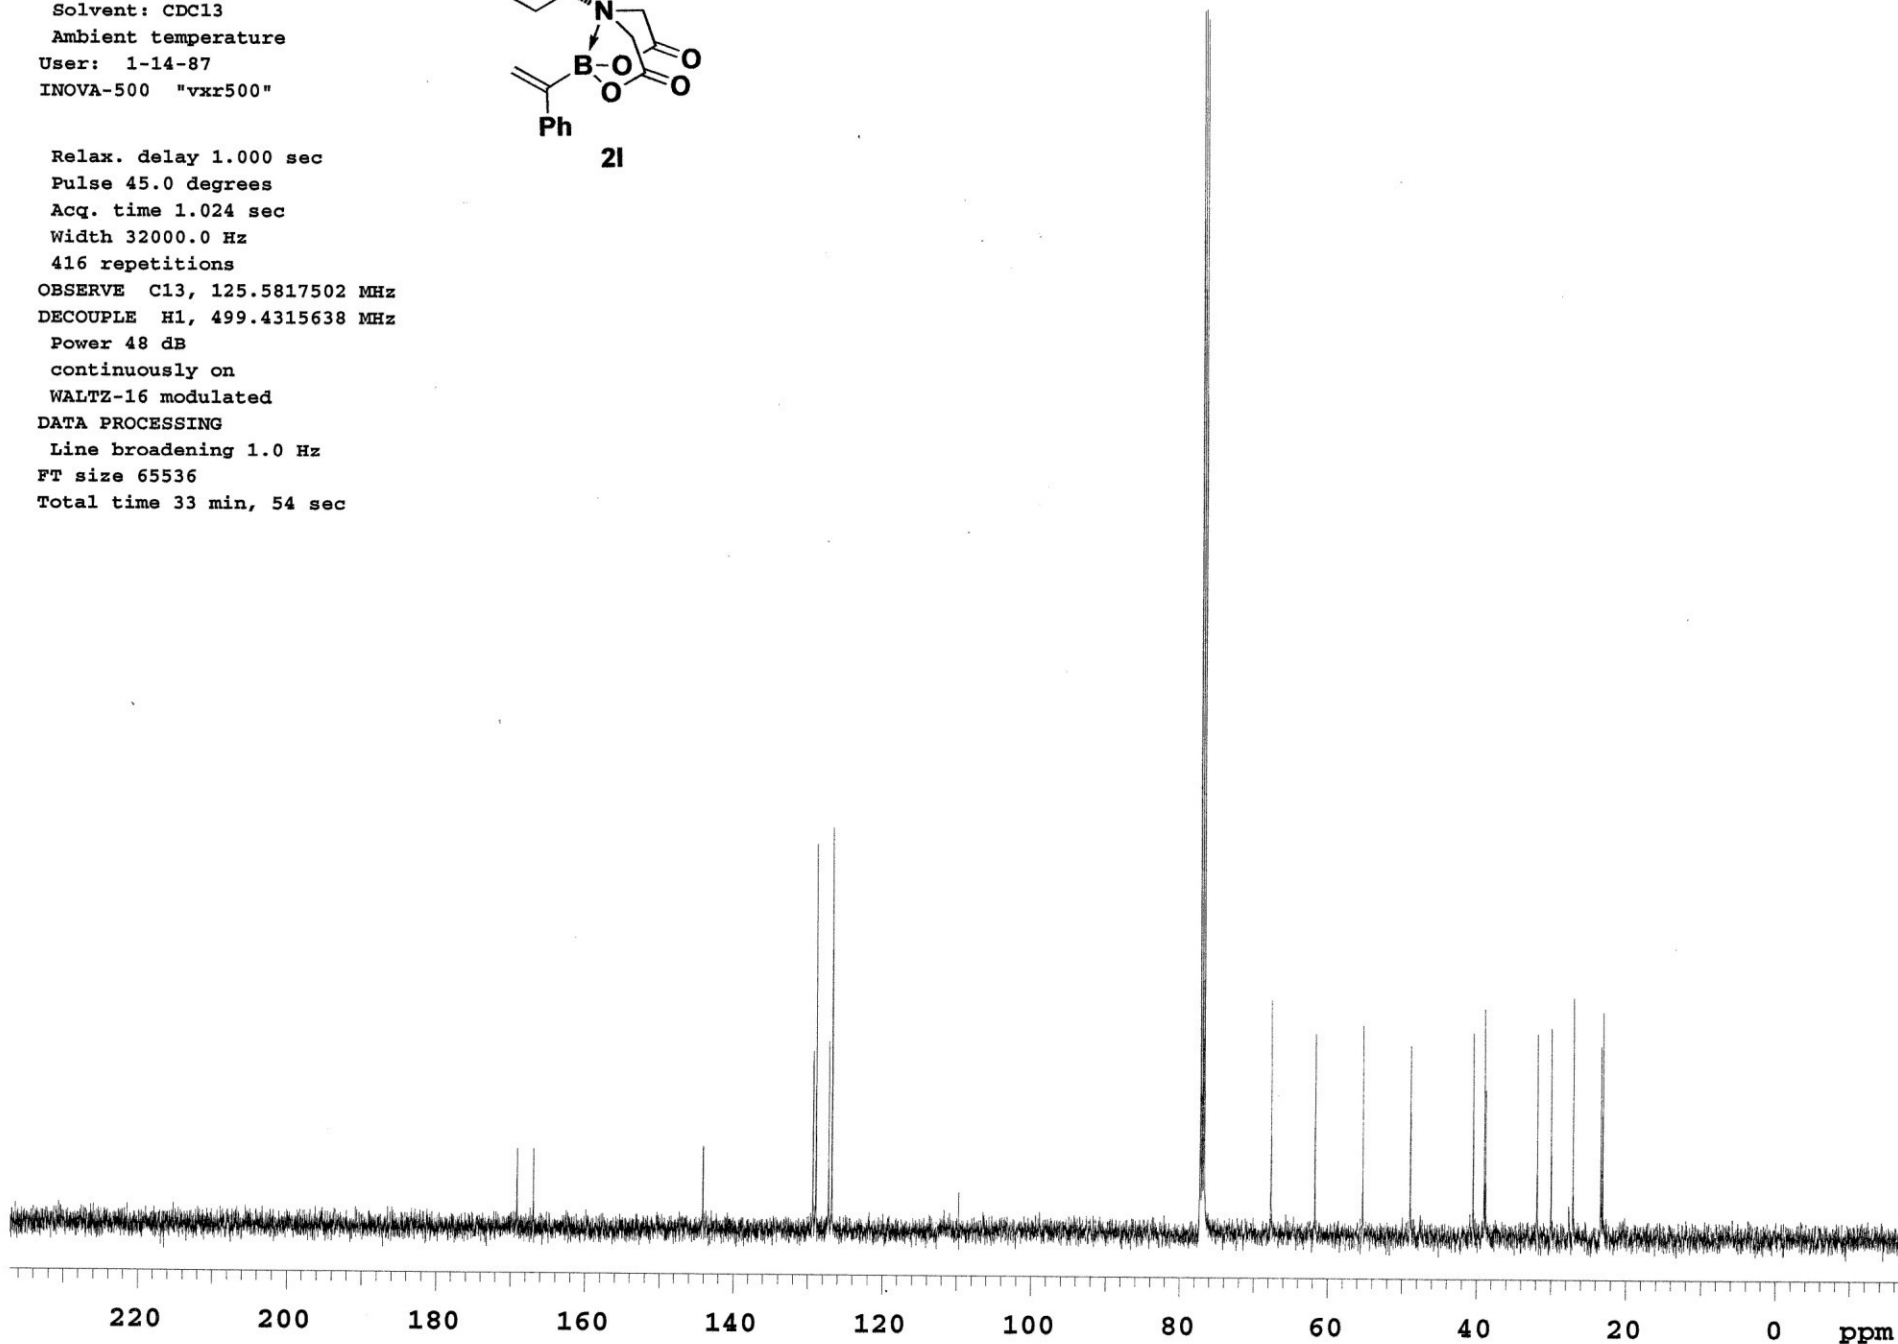

Pulse Sequence: s2pul

Solvent: CDCl3

Ambient temperature

INOVA-500 "u500"

Pulse 61.6 degrees

Acq. time 4.665 sec

Width 7024.9 Hz

4 repetitions

OBSERVE H1, 499.6906574 MHz

DATA PROCESSING

Line broadening 0.3 Hz

FT size 65536

Total time 0 min, 18 sec

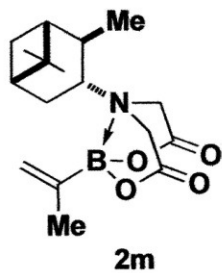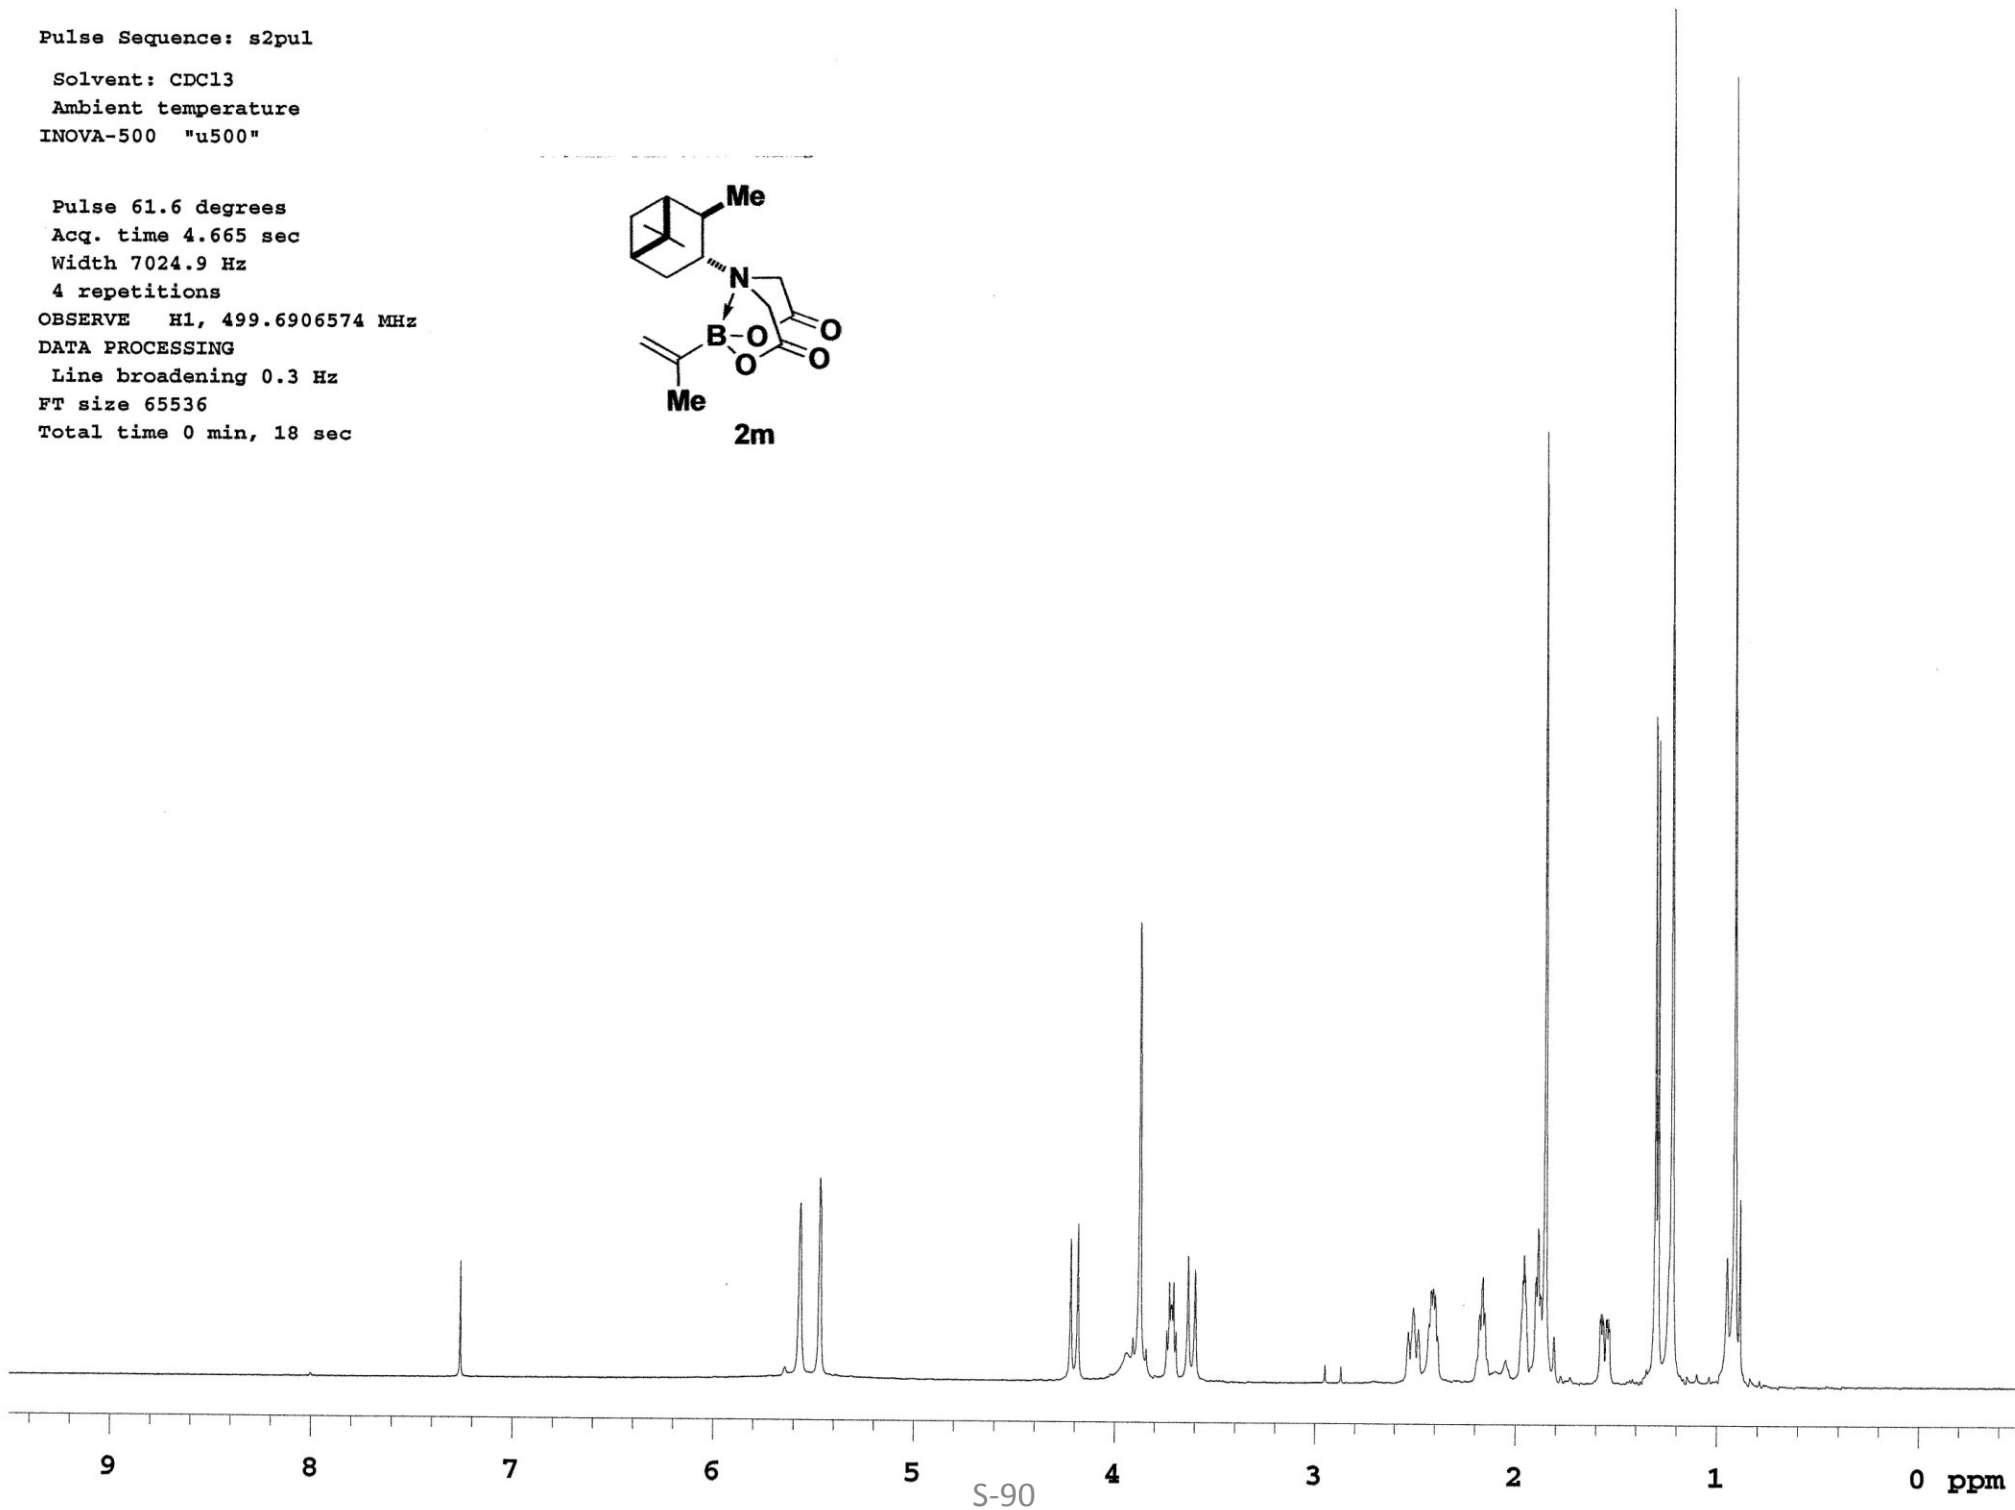

Pulse Sequence: s2pul

Solvent: CDC13

Ambient temperature

User: 1-14-87

File: C13\_060811\_JL\_isoprenylPIDA

INOVA-500 "sunds1"

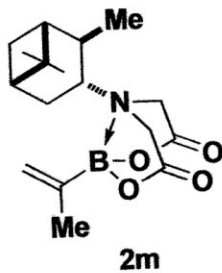

Relax. delay 1.000 sec

Pulse 42.4 degrees

Acq. time 1.086 sec

Width 30165.9 Hz

144 repetitions

OBSERVE C13, 125.6473193 MHz

DECOUPLE H1, 499.6923275 MHz

Power 44 dB

continuously on

WALTZ-16 modulated

DATA PROCESSING

Line broadening 1.0 Hz

FT size 65536

Total time 34 min, 57 sec

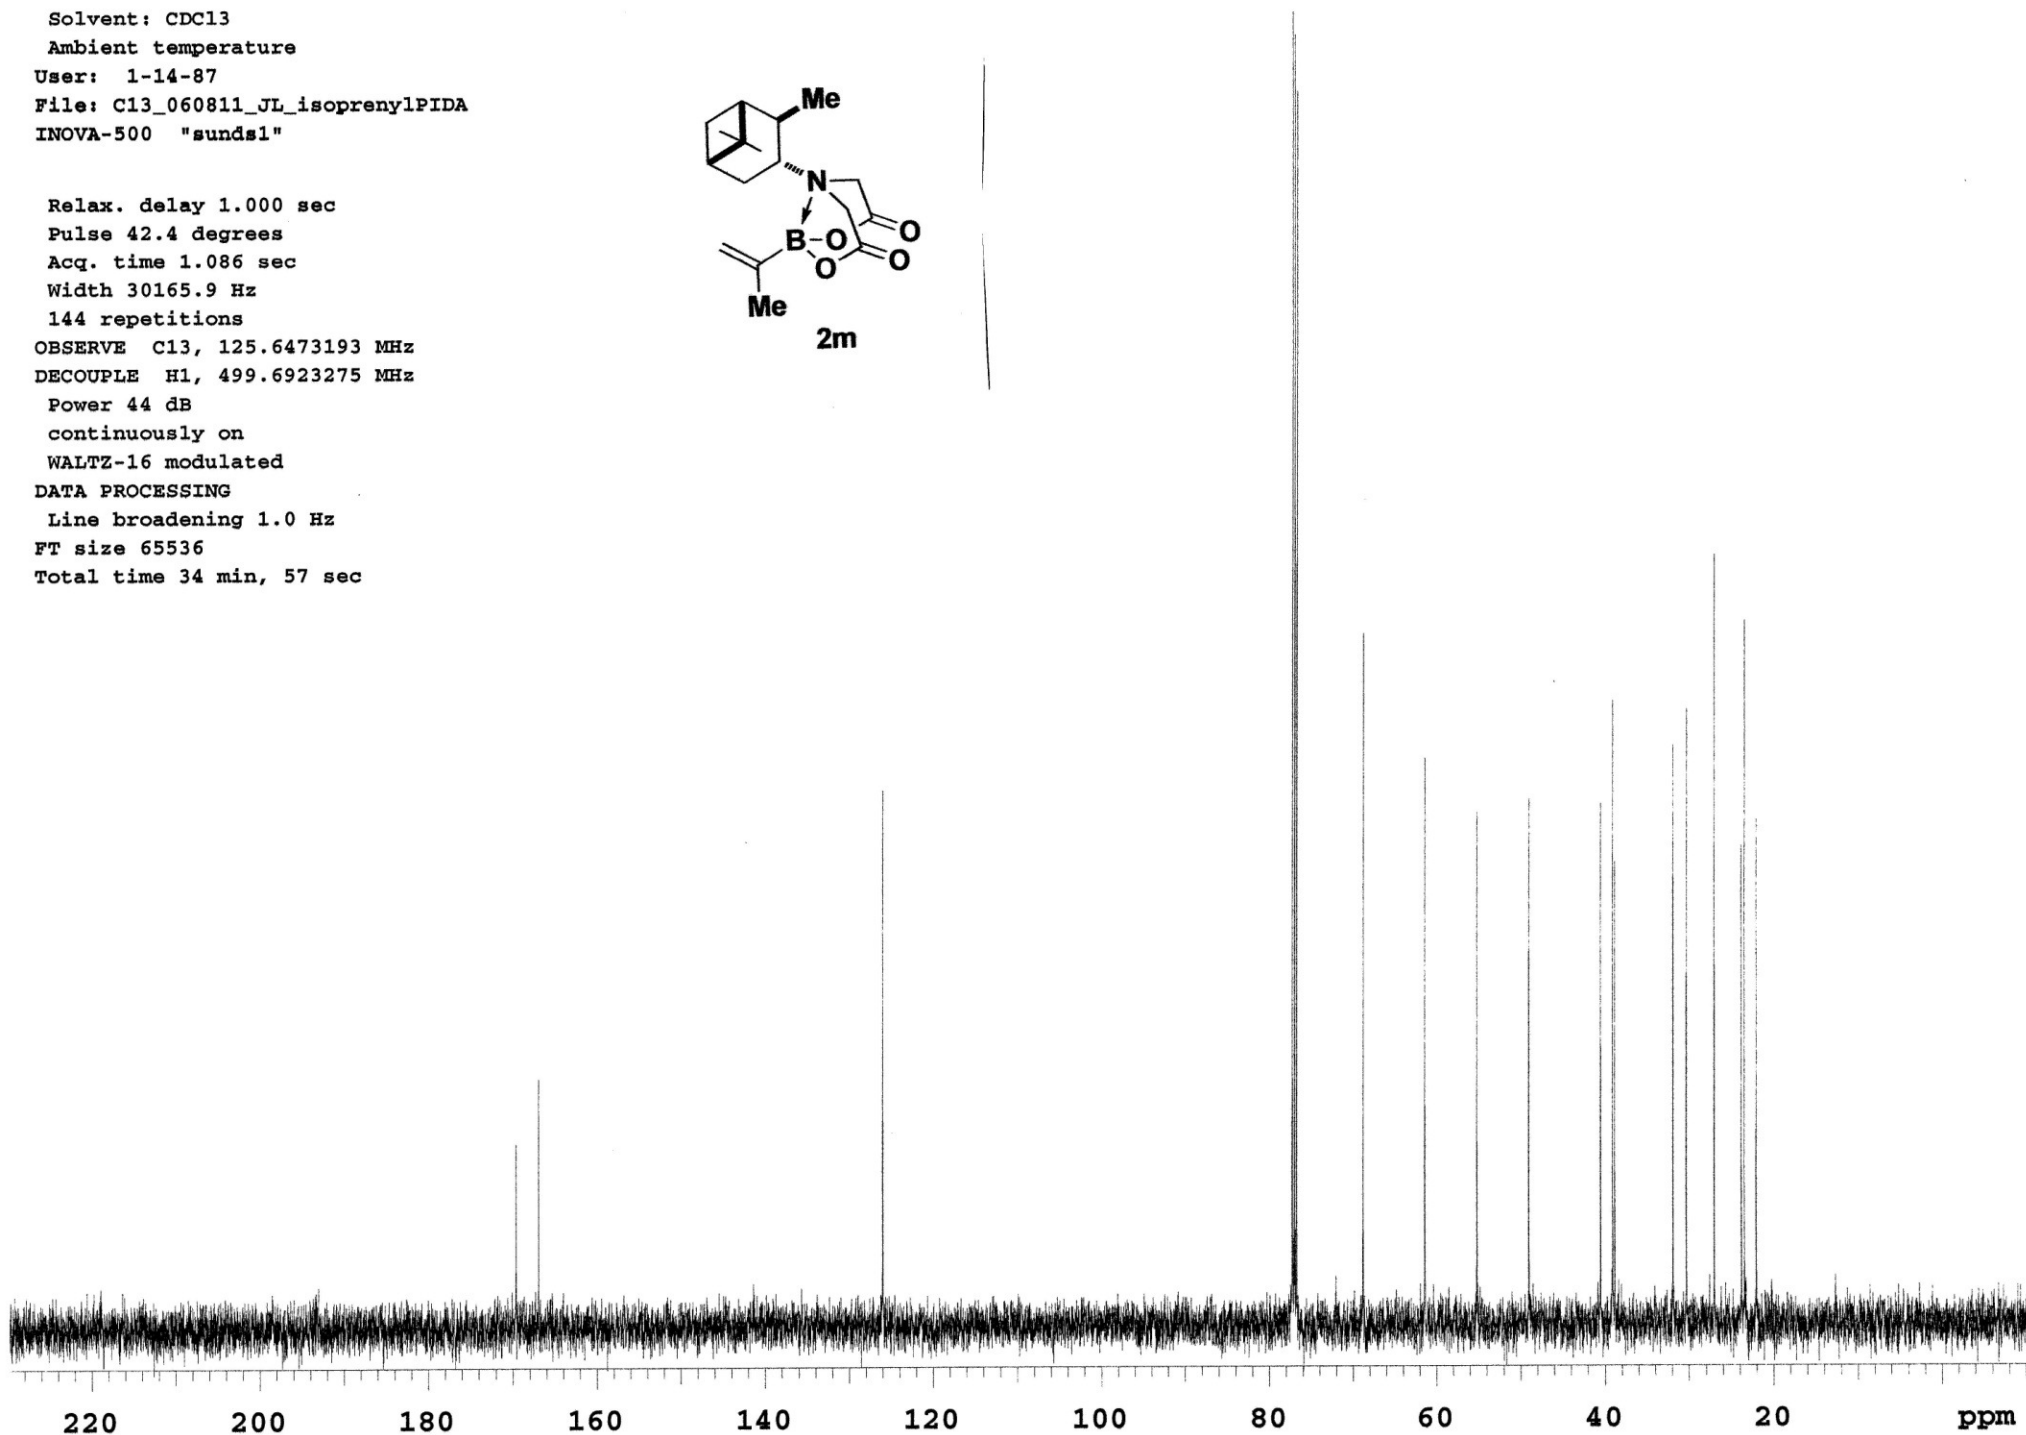

Pulse Sequence: s2pul

Solvent: CDCl<sub>3</sub>

Ambient temperature

INOVA-500 "u500"

Pulse 61.6 degrees

Acq. time 4.665 sec

Width 7024.9 Hz

8 repetitions

OBSERVE H1, 499.6906574 MHz

DATA PROCESSING

Line broadening 0.3 Hz

FT size 65536

Total time 0 min, 37 sec

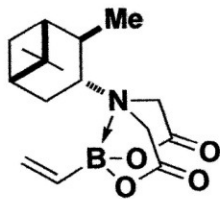

2n

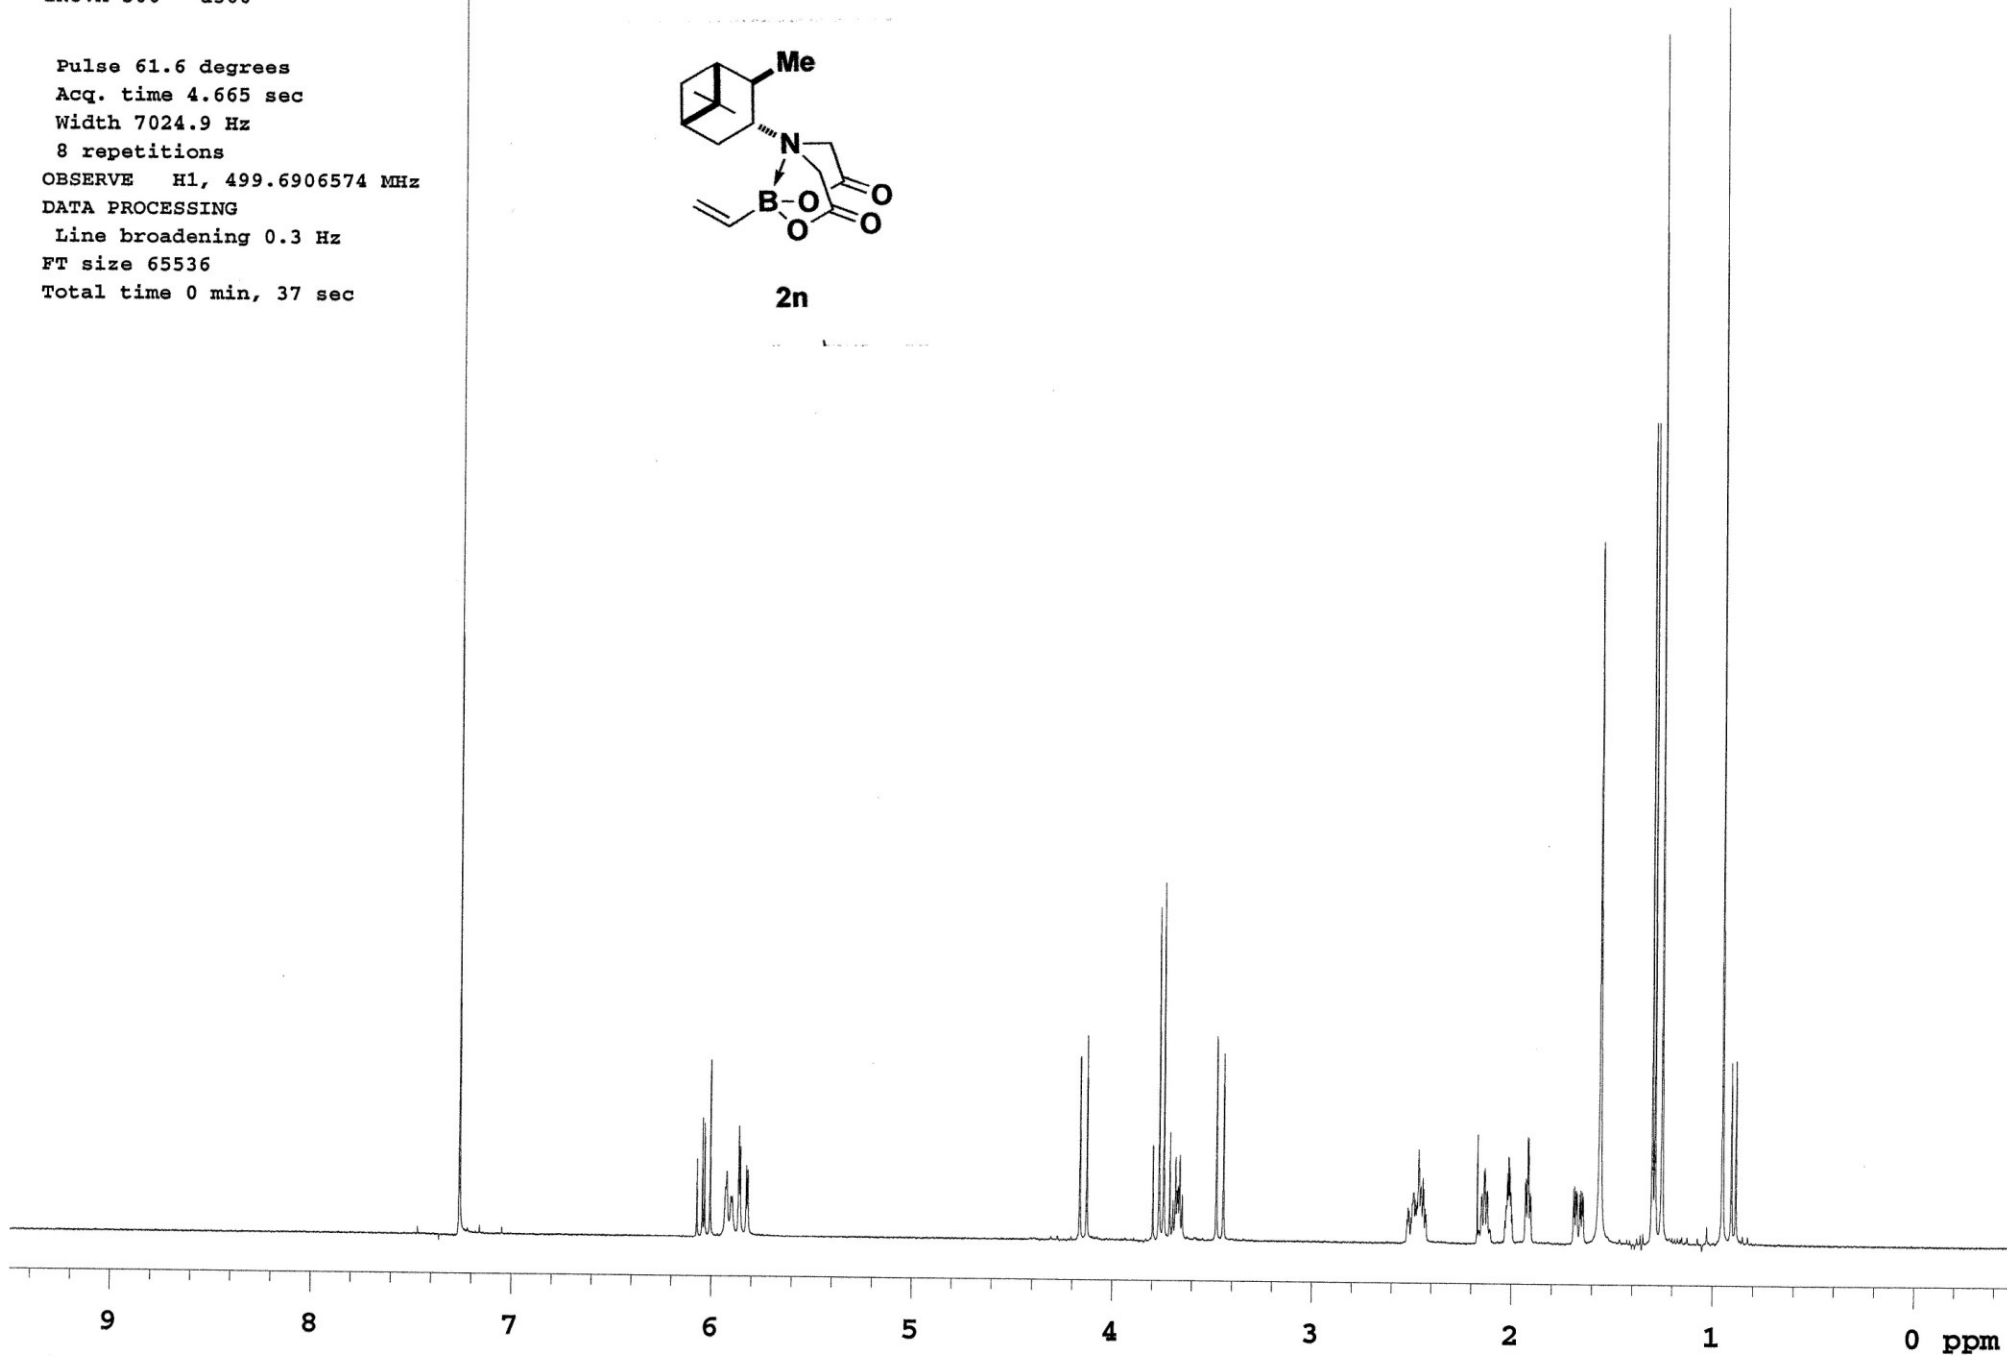

Pulse Sequence: s2pul

Solvent: Acetone  
Ambient temperature  
User: 1-14-87  
INOVA-500 "vxr500"

Relax. delay 1.000 sec  
Pulse 45.0 degrees  
Acq. time 1.024 sec  
Width 32000.0 Hz  
1184 repetitions  
OBSERVE C13, 125.5822914 MHz  
DECOUPLE H1, 499.4341558 MHz  
Power 48 dB  
continuously on  
WALTZ-16 modulated  
DATA PROCESSING  
Line broadening 1.0 Hz  
FT size 65536  
Total time 5 hr, 38 min, 51 sec

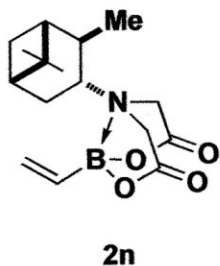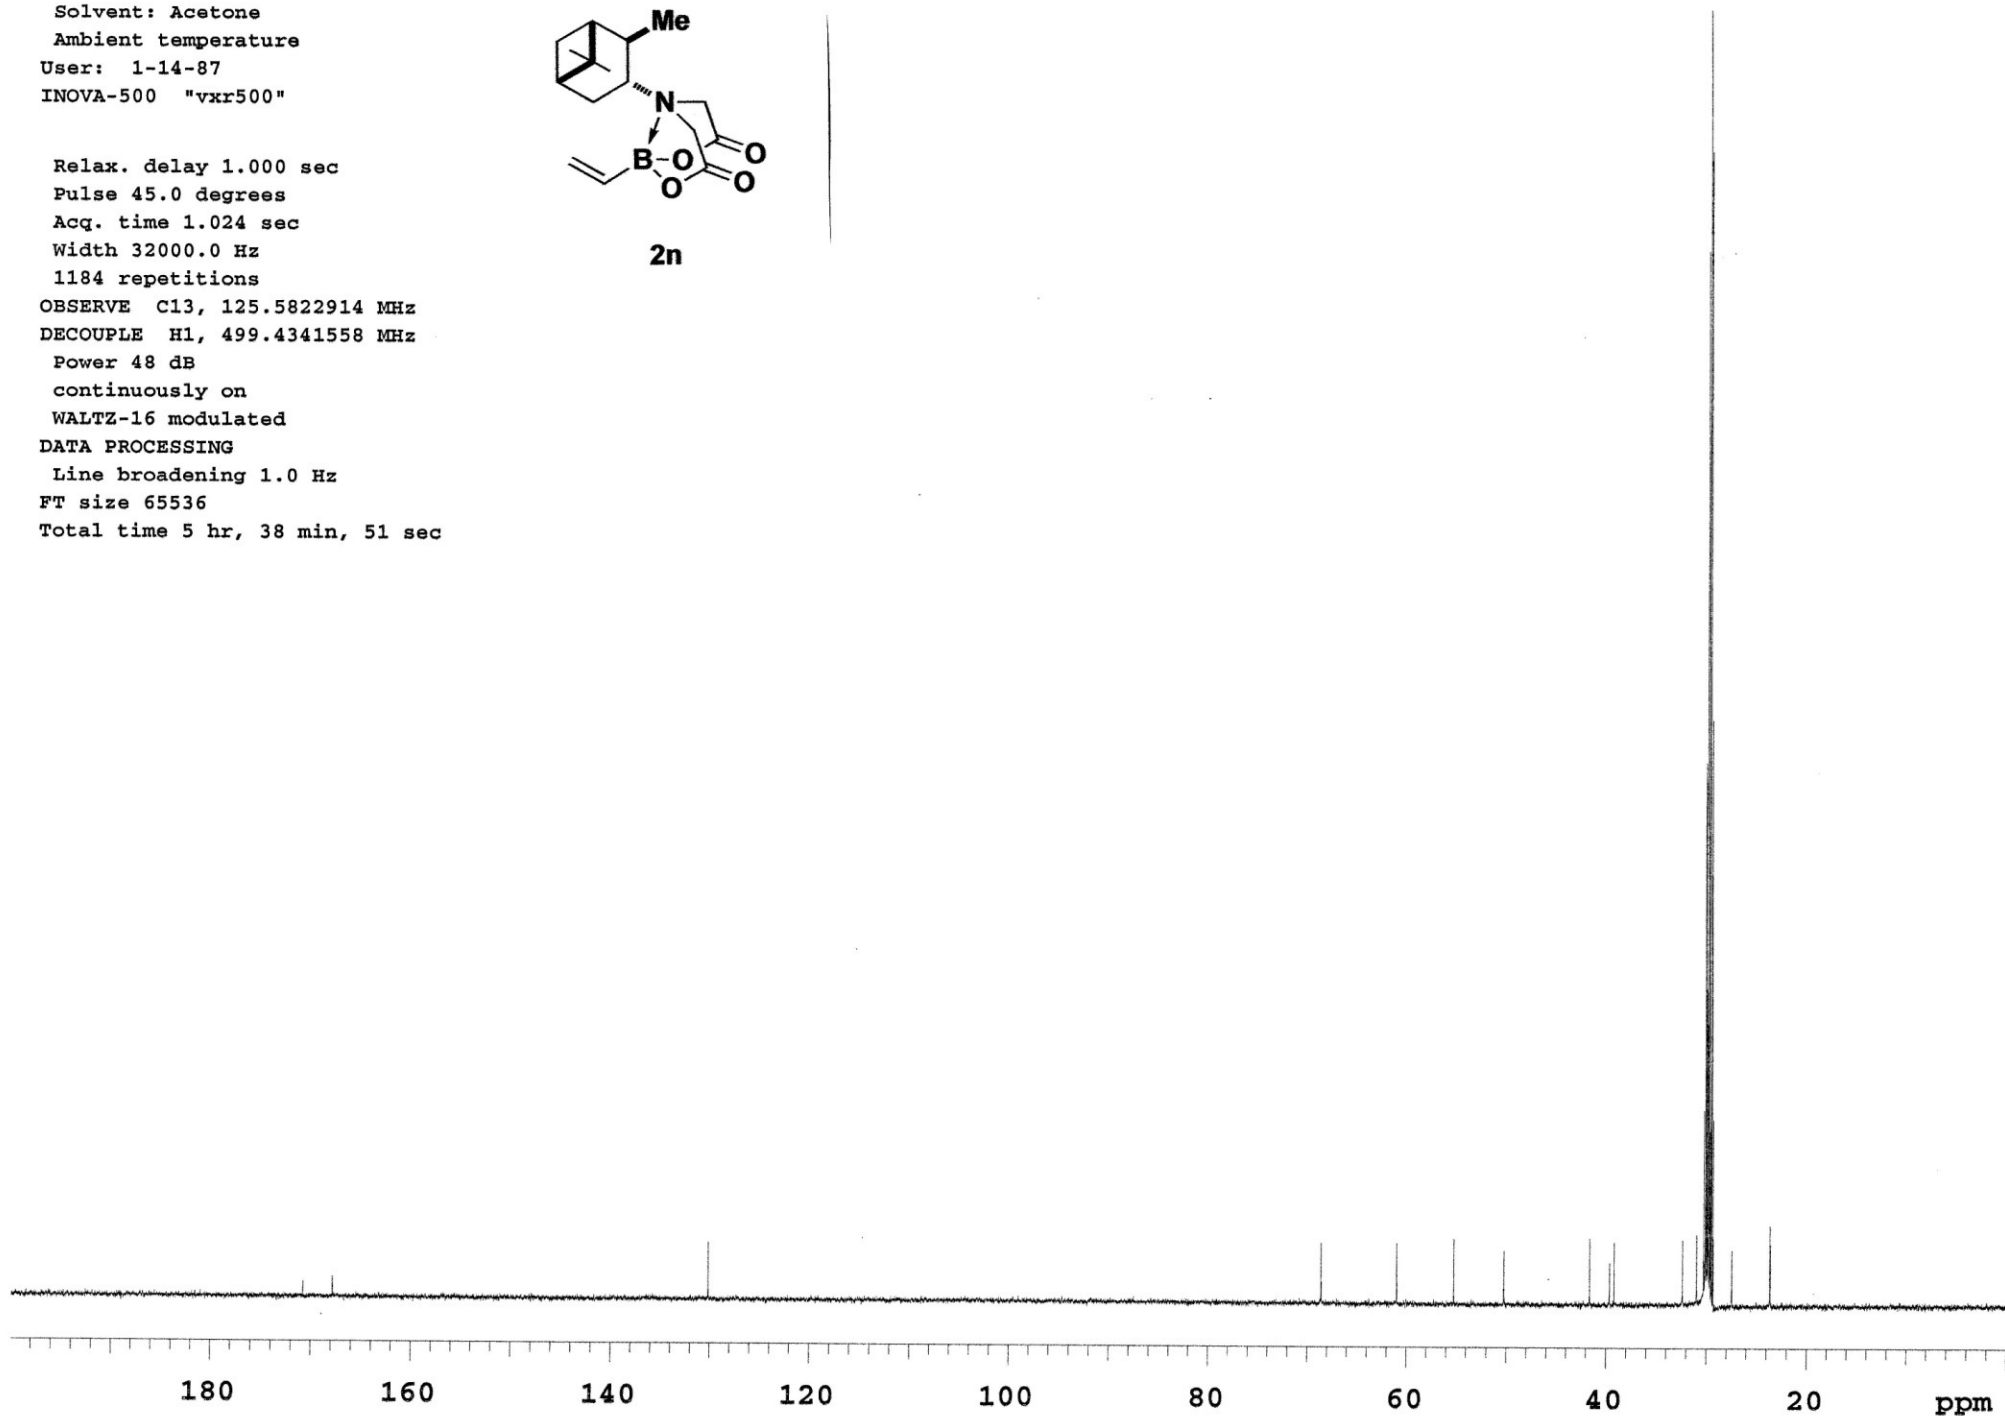

Pulse Sequence: s2pul

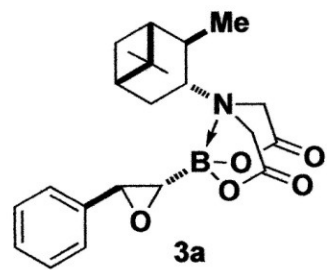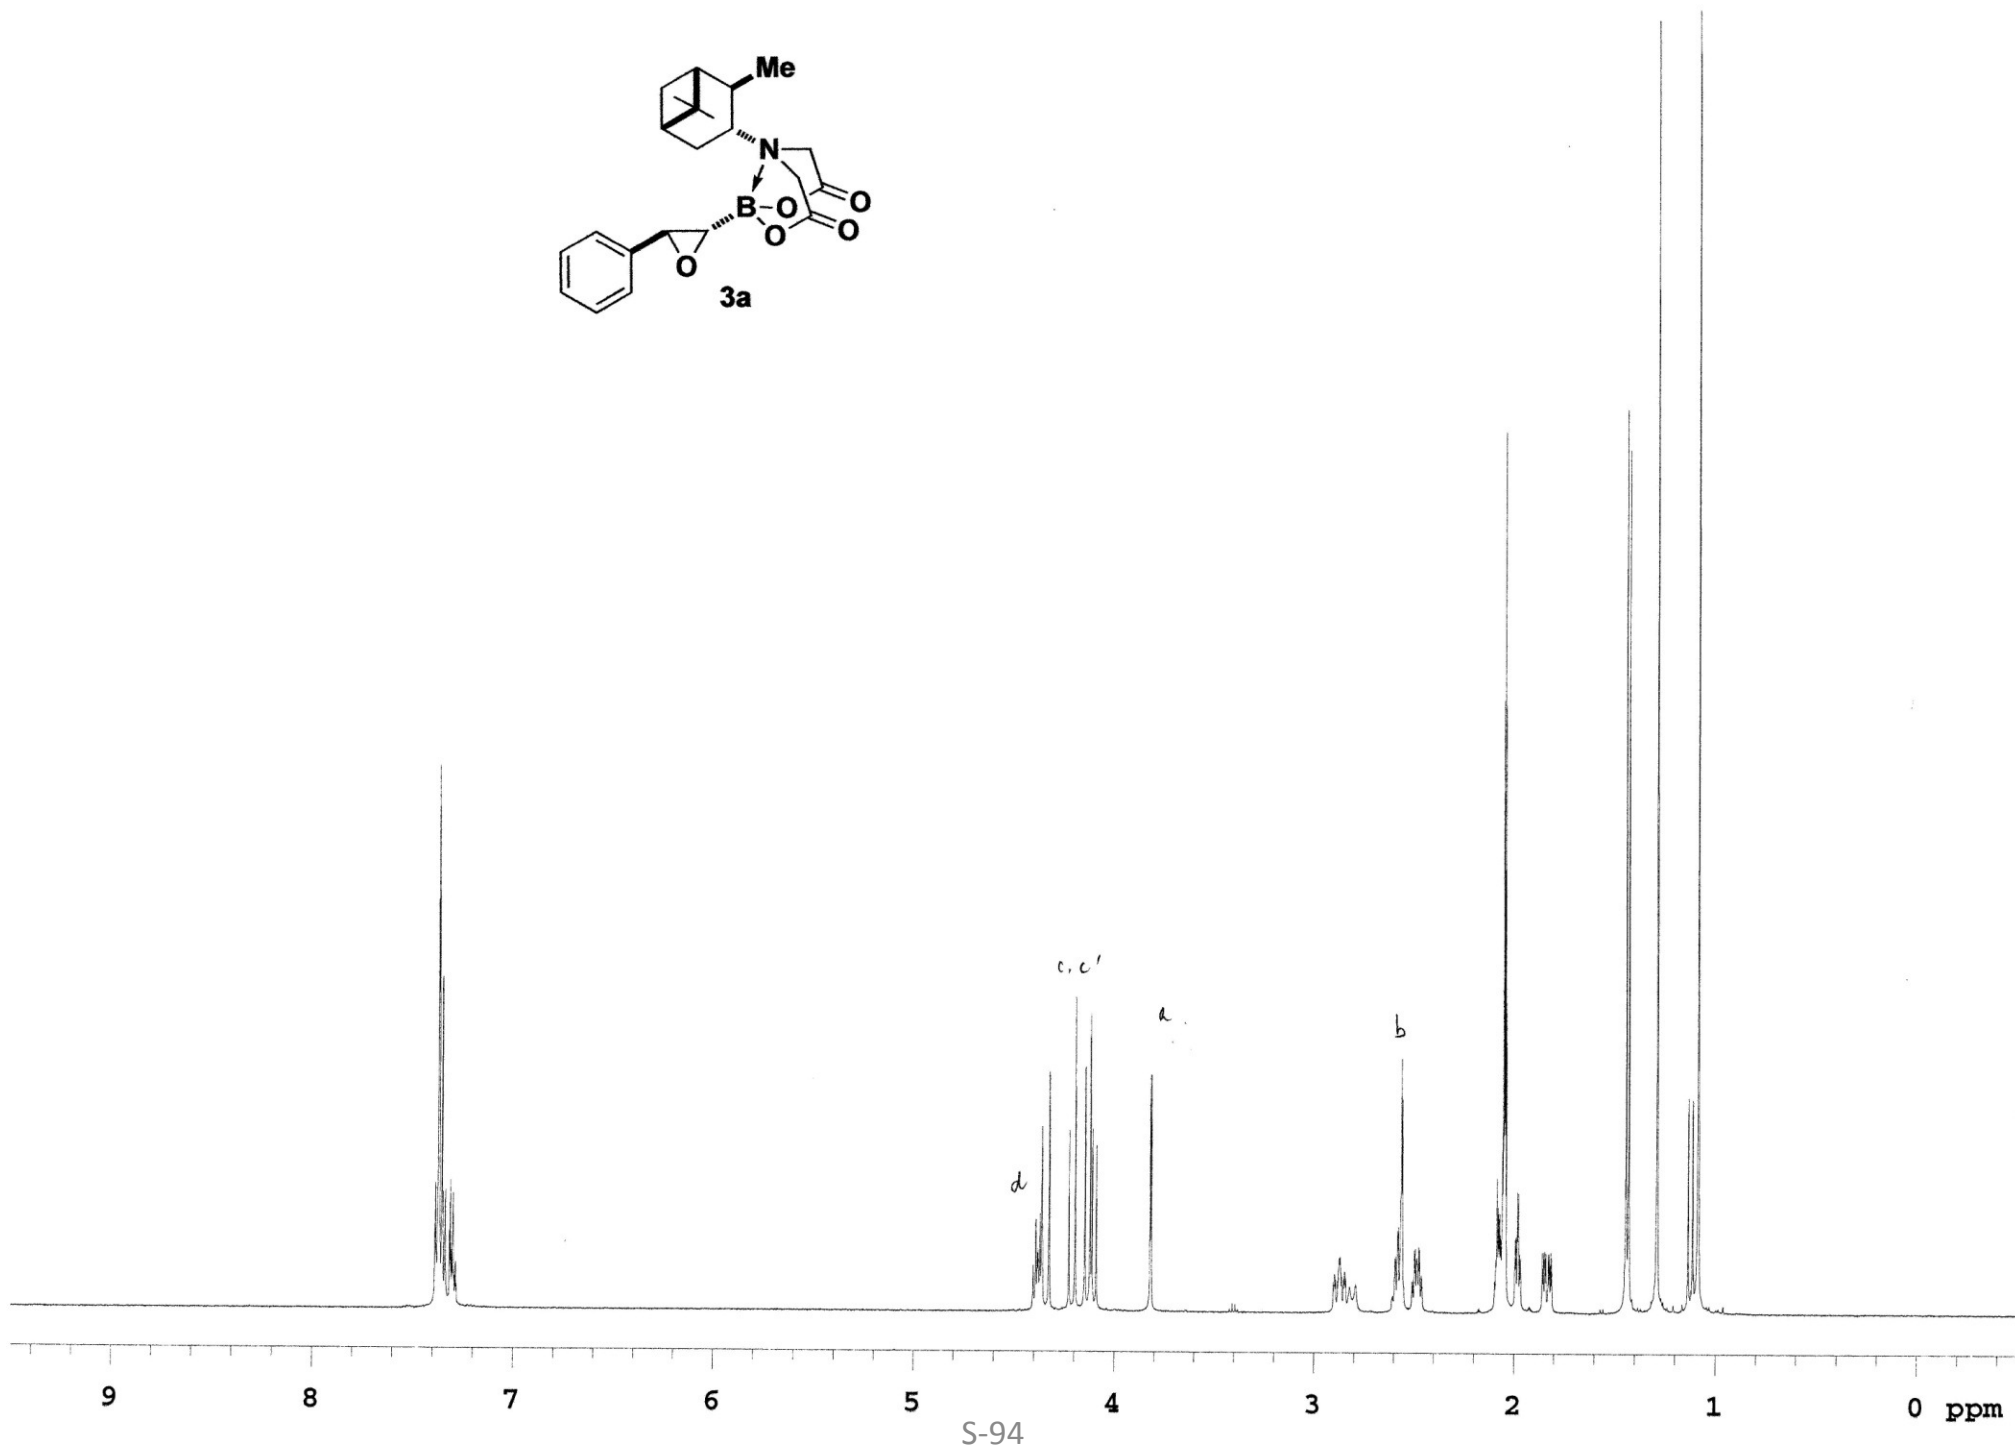

Pulse Sequence: s2pul

Solvent: CDCl<sub>3</sub>

Temp. 20.0 C / 293.1 K

User: 1-14-87

INOVA-500 "vkr500"

Relax. delay 1.000 sec

Pulse 45.0 degrees

Acq. time 1.024 sec

Width 32000.0 Hz

784 repetitions

OBSERVE C13, 125.5817502 MHz

DECOUPLE H1, 499.4315638 MHz

Power 48 dB

continuously on

WALTZ-16 modulated

DATA PROCESSING

Line broadening 1.0 Hz

FT size 65536

Total time 5 hr, 38 min, 51 sec

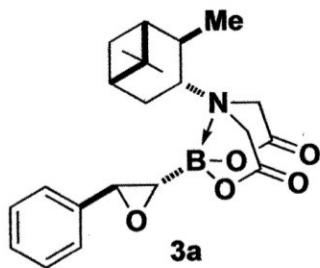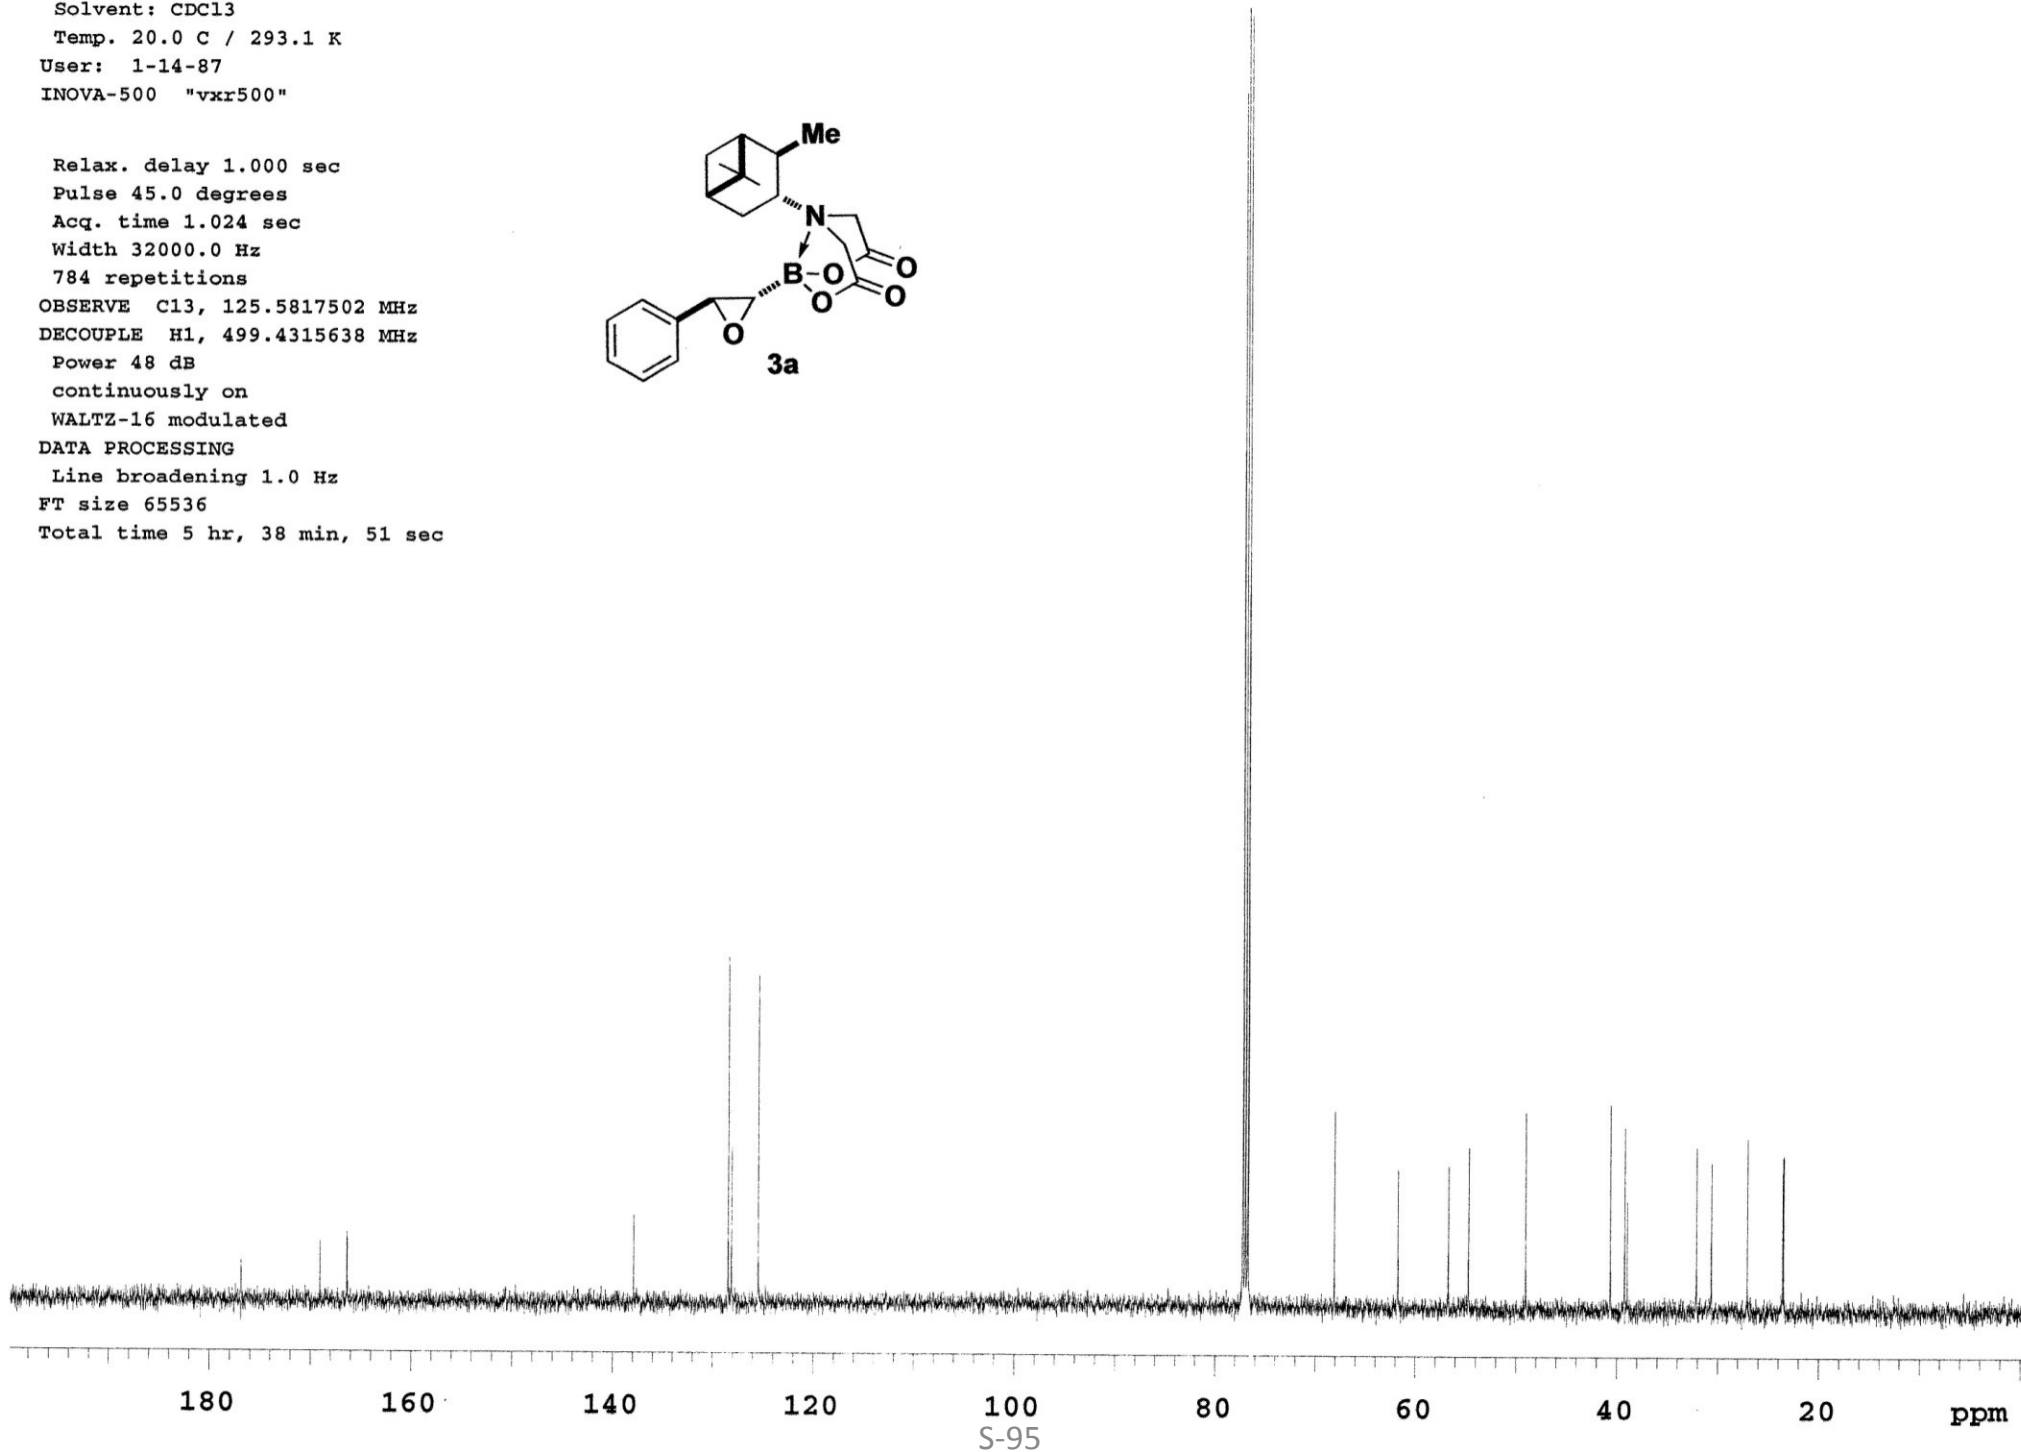

Pulse Sequence: s2pul

Solvent: CDCl3

Ambient temperature

INOVA-500 "vkr500"

Relax. delay 10.000 sec

Pulse 45.0 degrees

Acq. time 4.096 sec

Width 8000.0 Hz

32 repetitions

OBSERVE H1, 499.4298997 MHz

DATA PROCESSING

Line broadening 0.3 Hz

FT size 65536

Total time 7 min, 31 sec

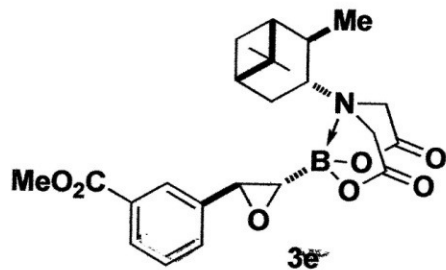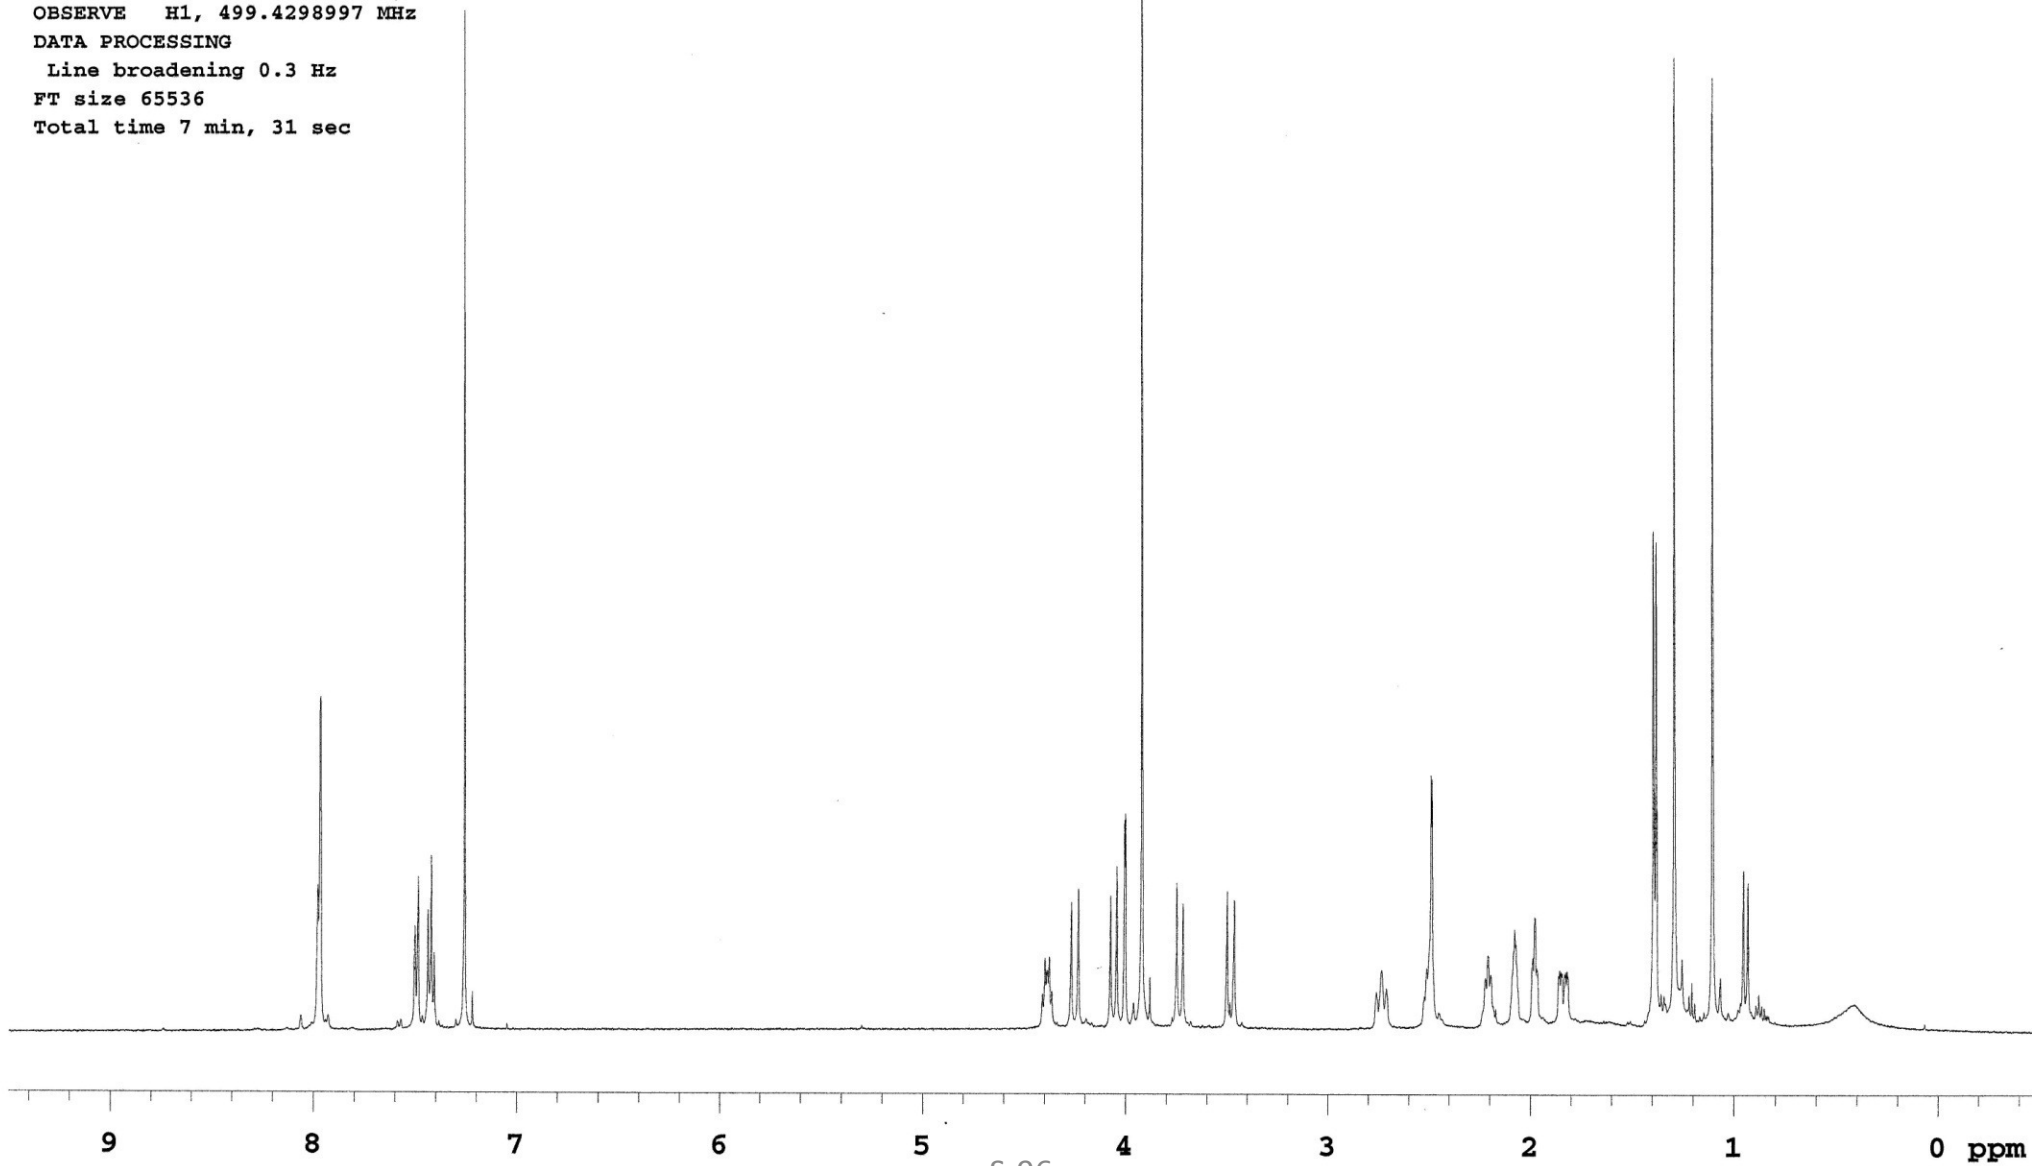



Pulse Sequence: s2pul

Solvent: CDCl3

Ambient temperature

User: 1-14-87

INOVA-500 "vkr500"

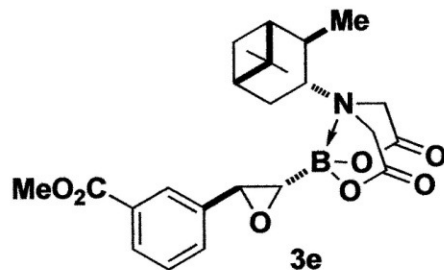

Relax. delay 1.000 sec

Pulse 45.0 degrees

Acq. time 1.024 sec

Width 32000.0 Hz

256 repetitions

OBSERVE C13, 125.5817502 MHz

DECOUPLE H1, 499.4315638 MHz

Power 48 dB

continuously on

WALTZ-16 modulated

DATA PROCESSING

Line broadening 1.0 Hz

FT size 65536

Total time 33 min, 54 sec

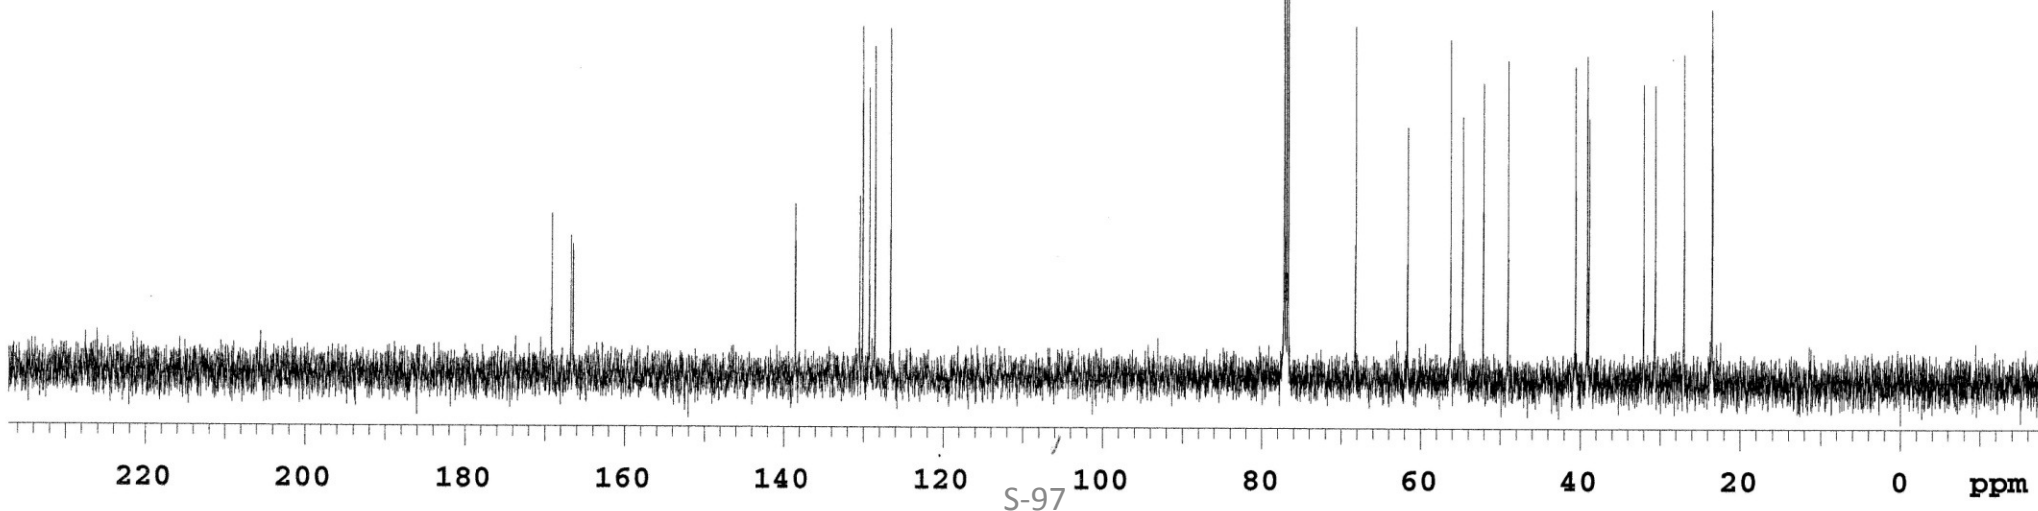

Pulse Sequence: s2pul

Solvent: CDCl3  
Ambient temperature  
INOVA-500 "ui500nb"

Relax. delay 10.000 sec  
Pulse 90.0 degrees  
Acq. time 4.096 sec  
Width 8000.0 Hz  
4 repetitions  
OBSERVE H1, 500.0677748 MHz  
DATA PROCESSING  
Line broadening 0.3 Hz  
FT size 65536  
Total time 0 min, 56 sec

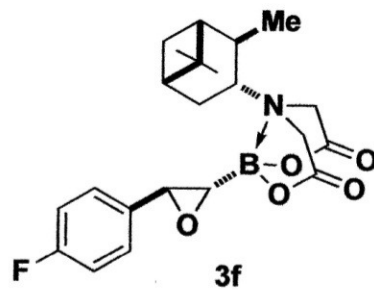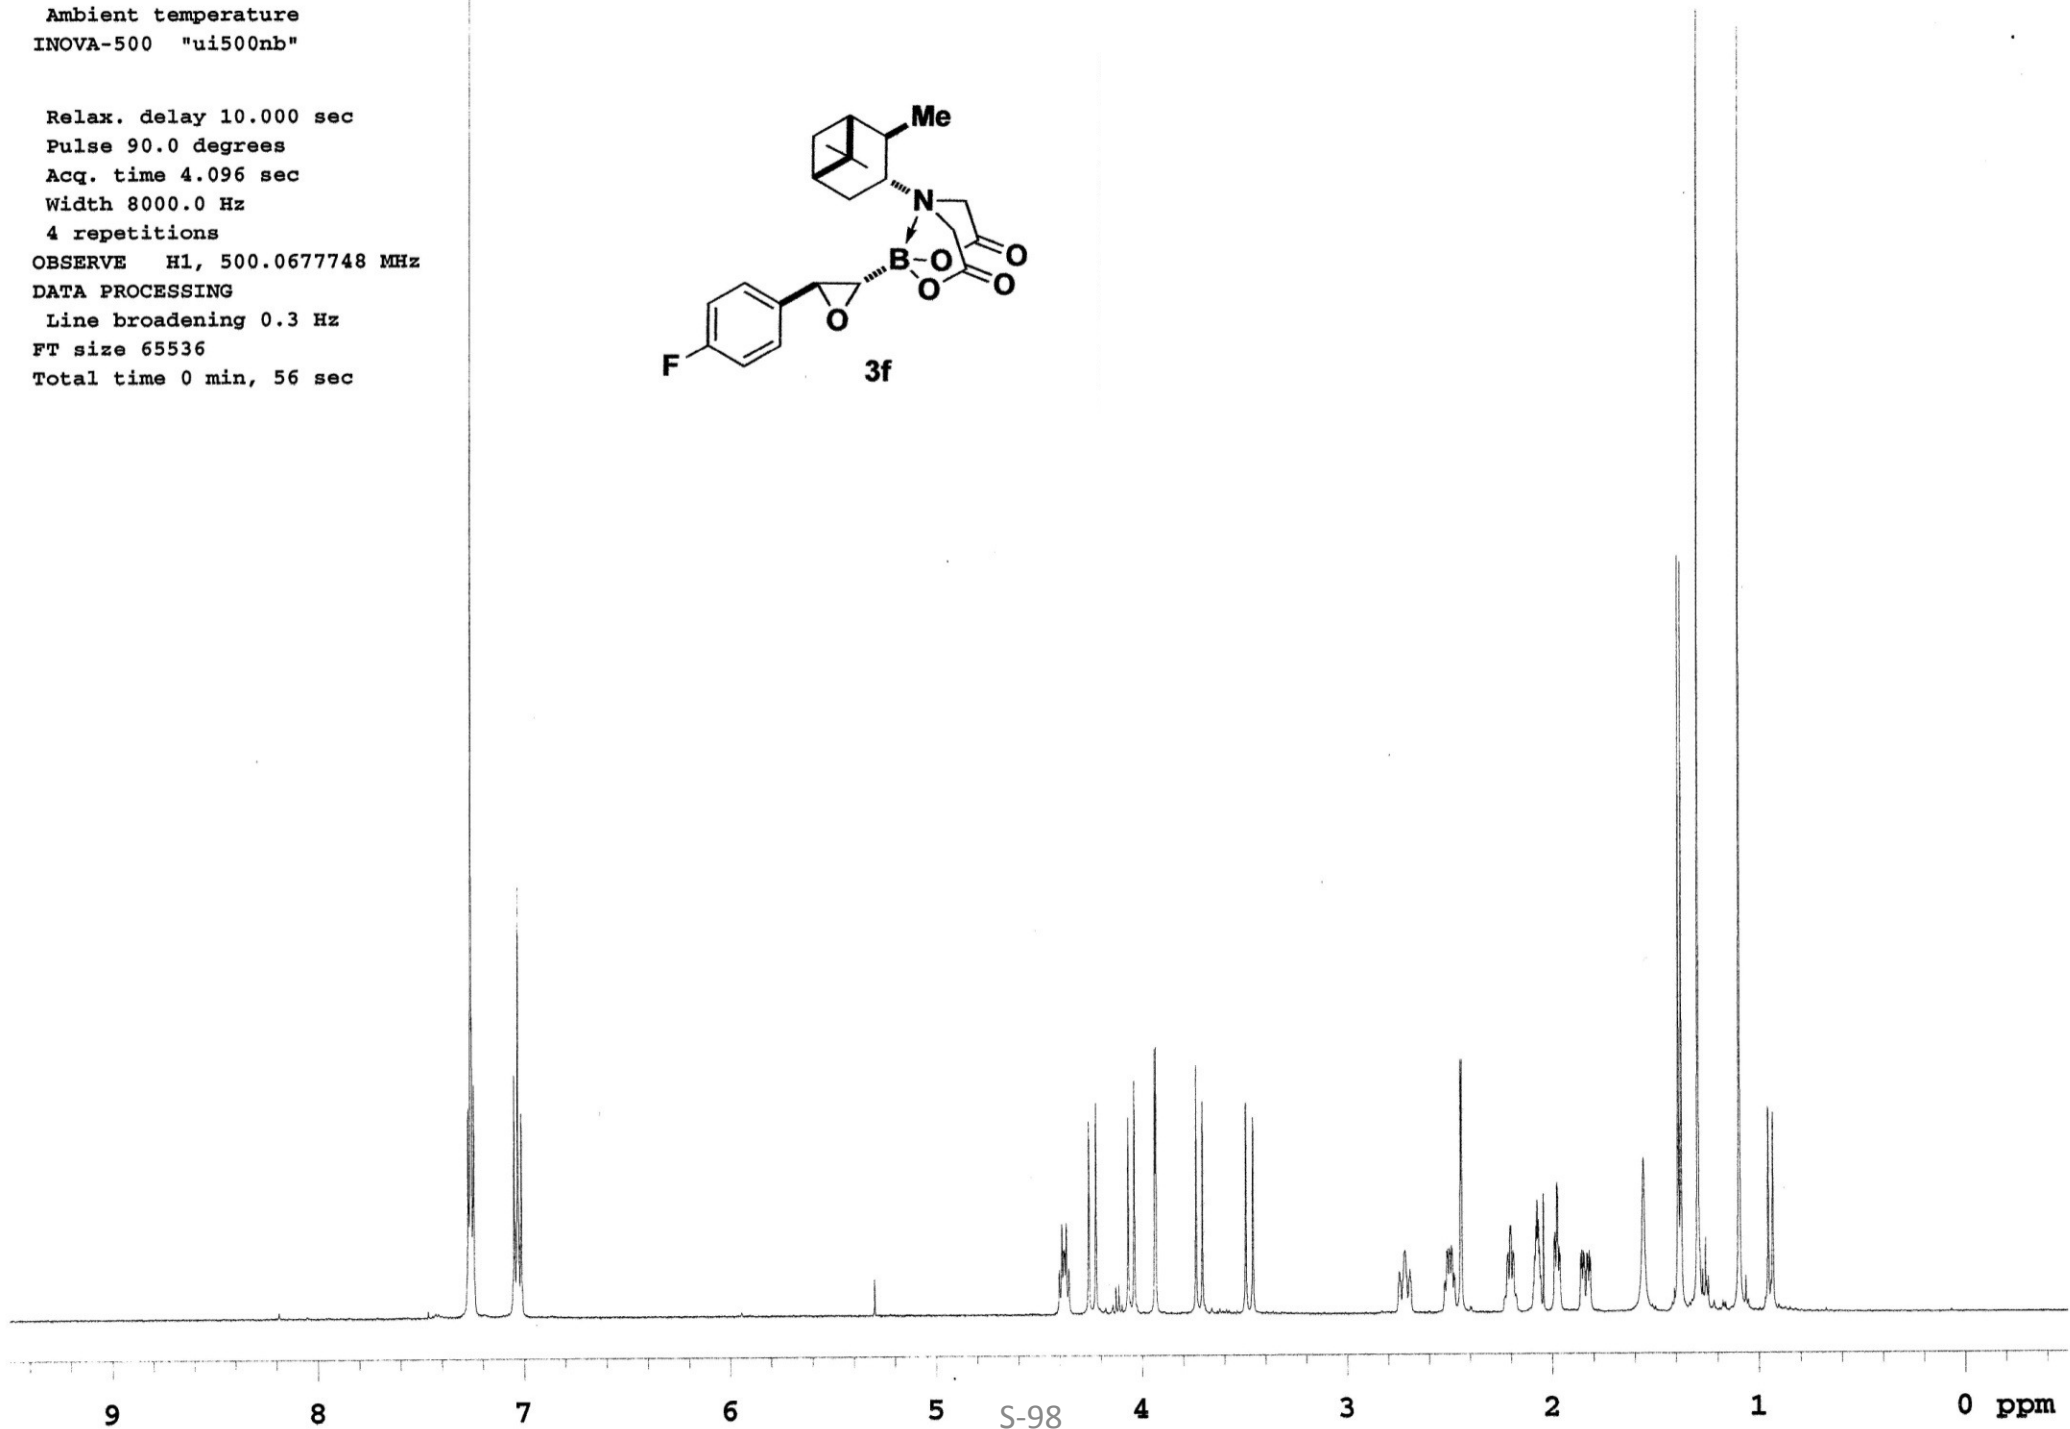

Pulse Sequence: s2pul

Solvent: CDCl3

Ambient temperature

User: 1-14-87

INOVA-500 "vvr500"

Relax. delay 1.000 sec

Pulse 45.0 degrees

Acq. time 1.024 sec

Width 32000.0 Hz

416 repetitions

OBSERVE C13, 125.5817166 MHz

DECOUPLE H1, 499.4315638 MHz

Power 48 dB

continuously on

WALTZ-16 modulated

DATA PROCESSING

Line broadening 1.0 Hz

FT size 65536

Total time 33 min, 54 sec

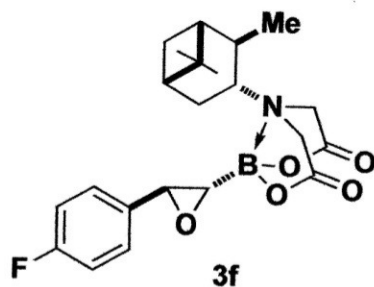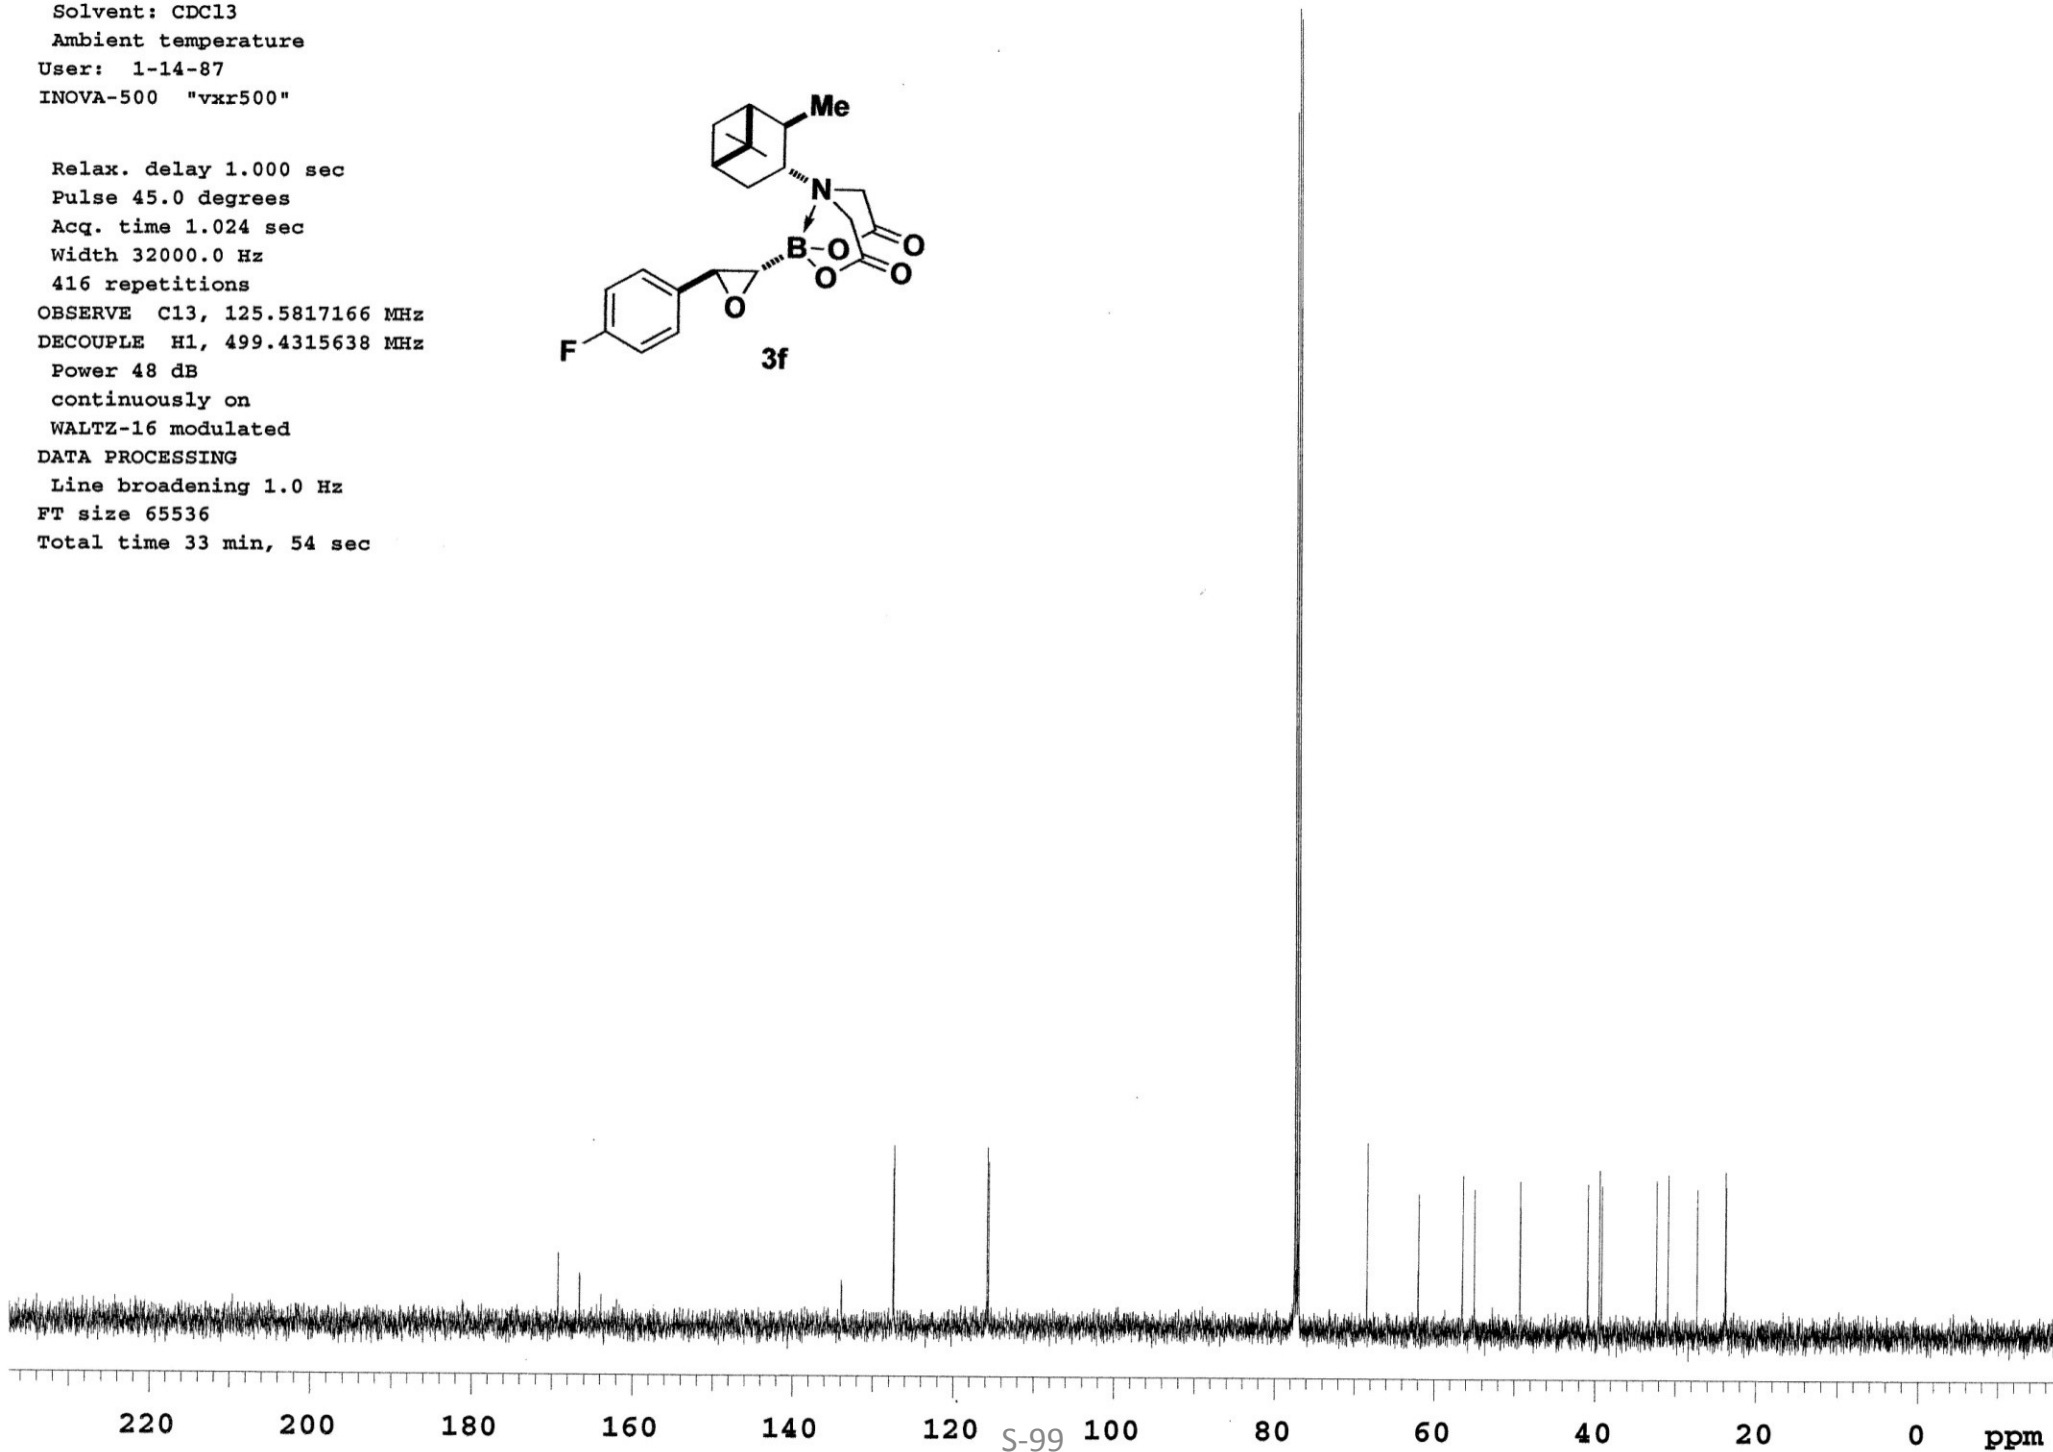

Pulse Sequencer: s2pul

Solvent: CDCl<sub>3</sub>

Temp. 20.0 °C / 293.1 K

INOVA-500 "vkr500"

Relax. delay 10.000 sec

Pulse 45.0 degrees

Acq. time 4.096 sec

Width 8000.0 Hz

32 repetitions

OBSERVE H1, 499.4298992 MHz

DATA PROCESSING

Line broadening 0.3 Hz

FT size 65536

Total time 7 min, 31 sec

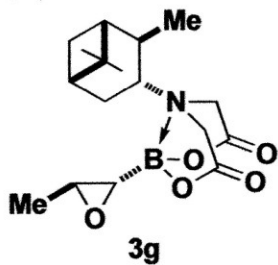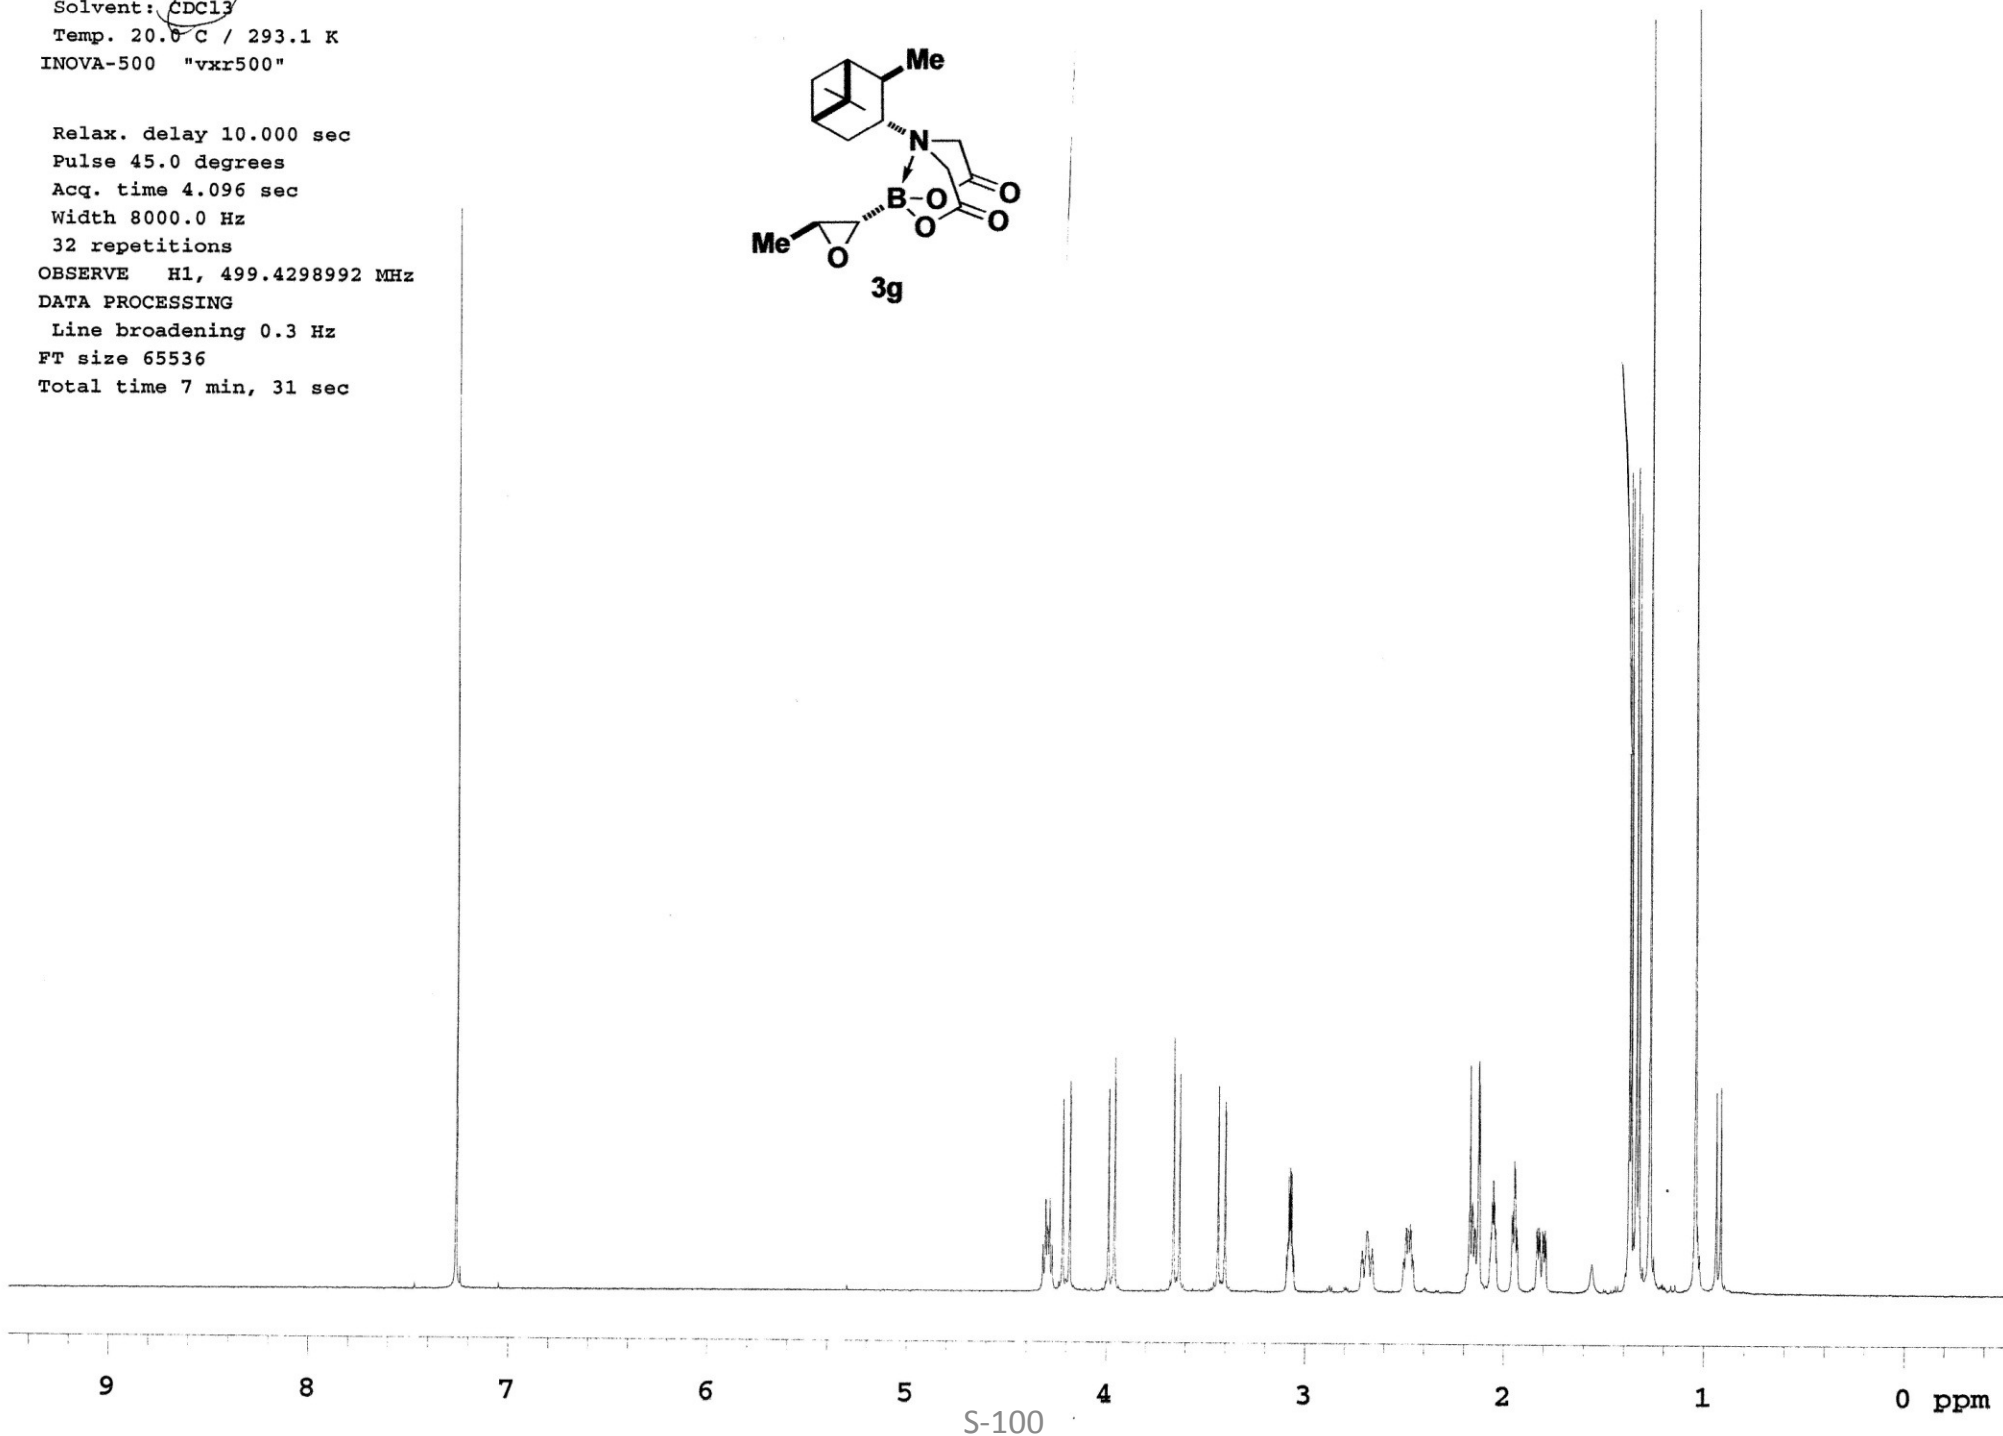

Pulse Sequence: s2pul

Solvent: CDCl<sub>3</sub>  
Temp. 20.0 °C / 293.1 K  
User: 1-14-87  
INOVA-500 "vvr500"

Relax. delay 1.000 sec  
Pulse 45.0 degrees  
Acq. time 1.024 sec  
Width 32000.0 Hz  
656 repetitions  
OBSERVE C13, 125.5817483 MHz  
DECOUPLE H1, 499.4315638 MHz  
Power 48 dB  
continuously on  
WALTZ-16 modulated  
DATA PROCESSING  
Line broadening 1.0 Hz  
FT size 65536  
Total time 5 hr, 38 min, 51 sec

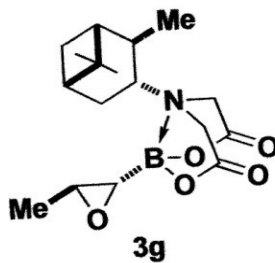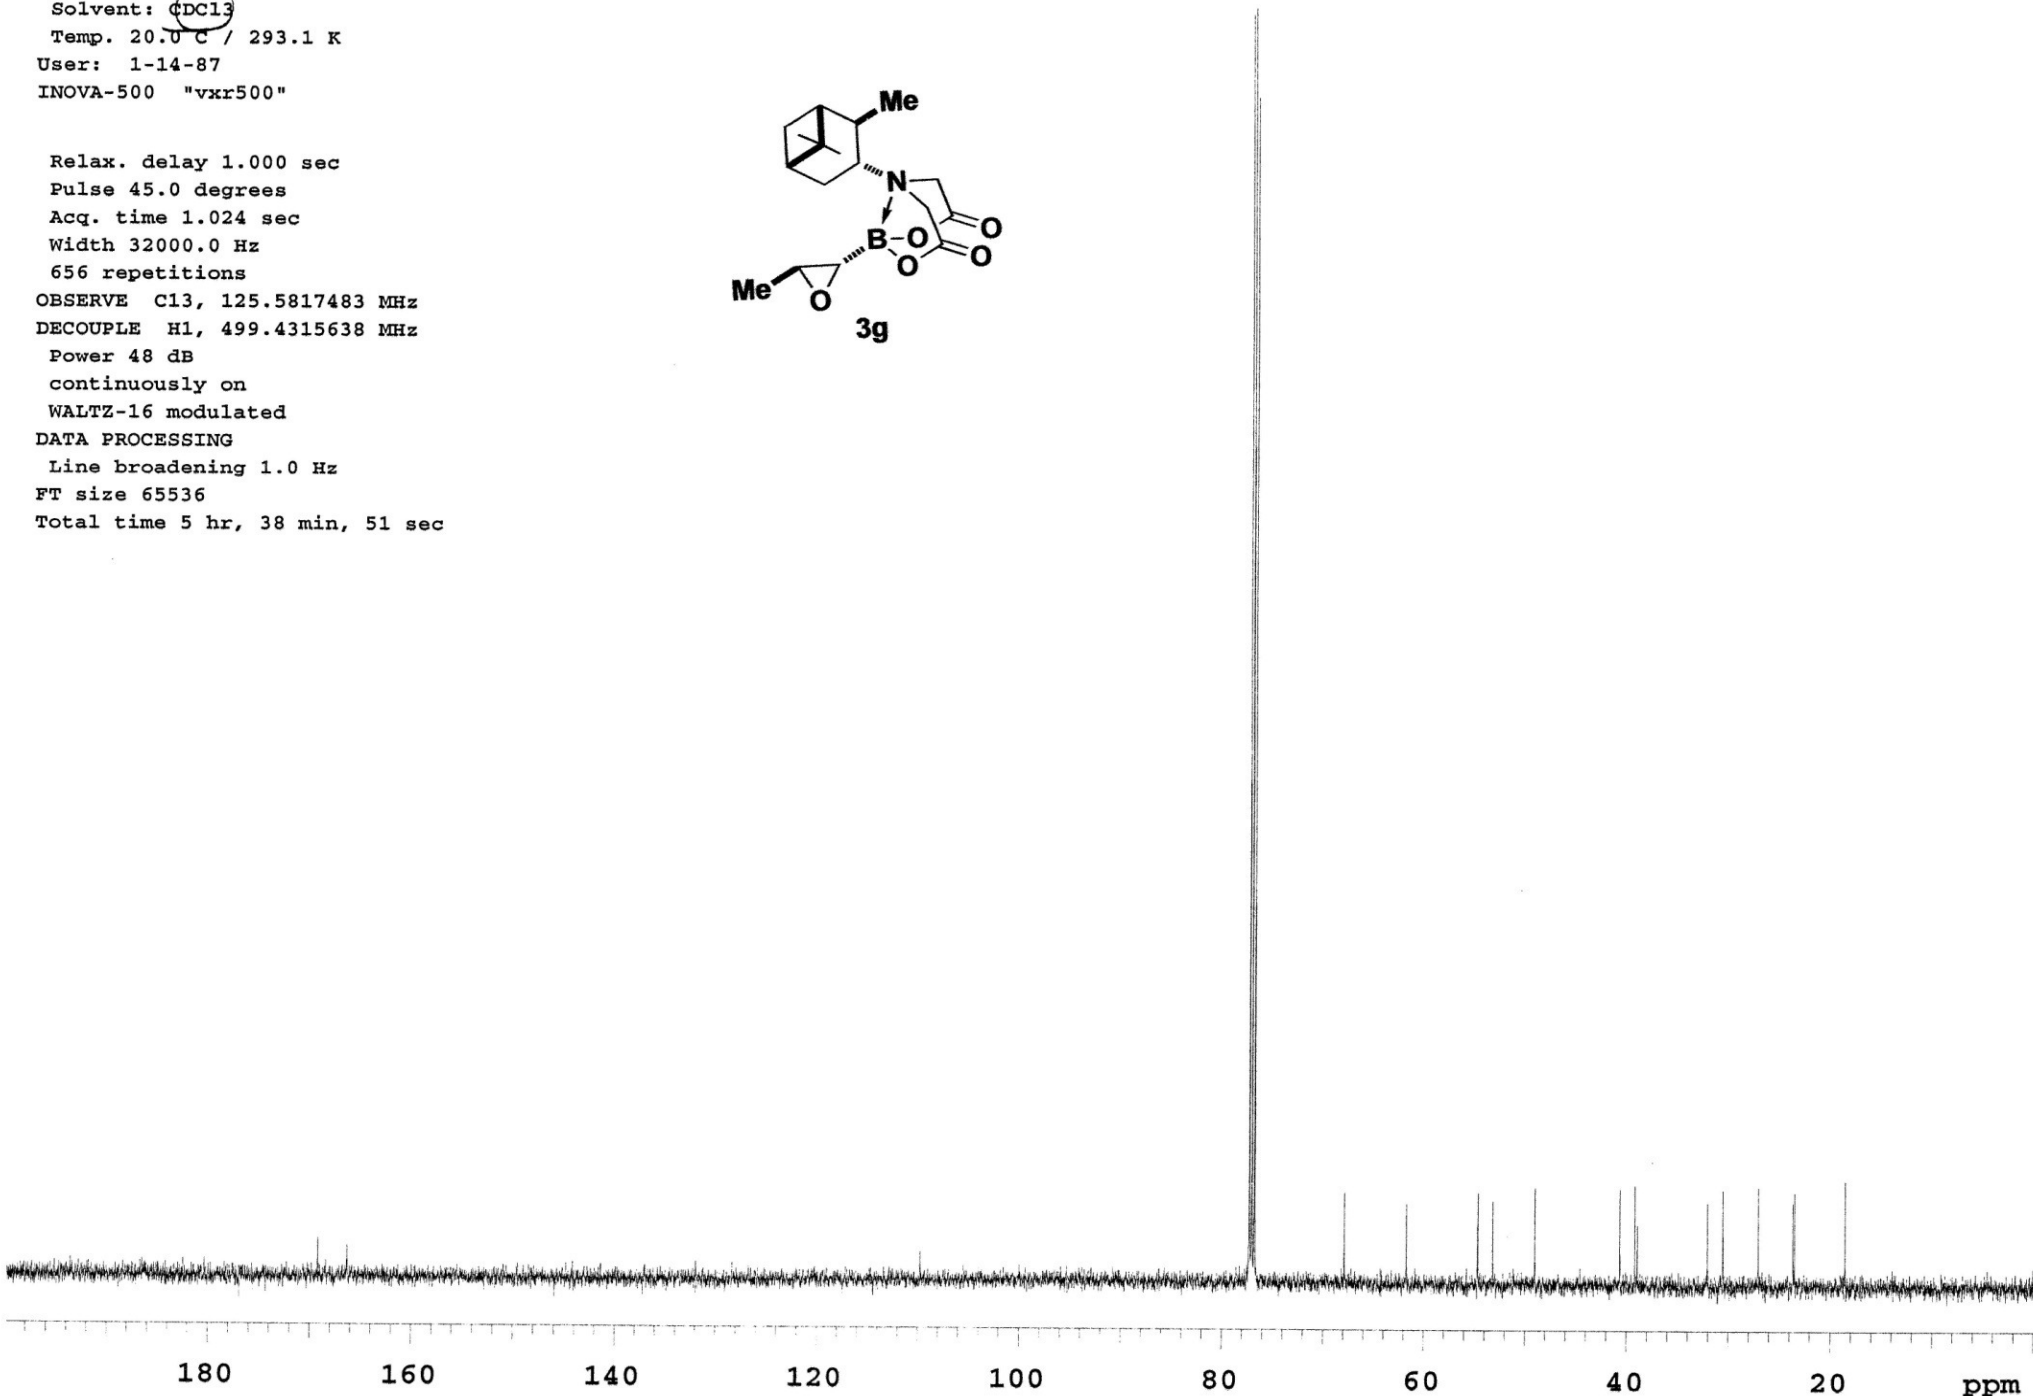

Pulse Sequence: s2pul

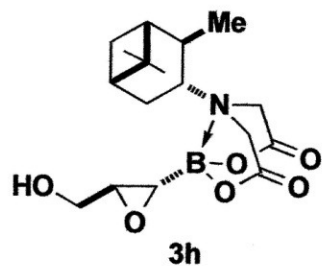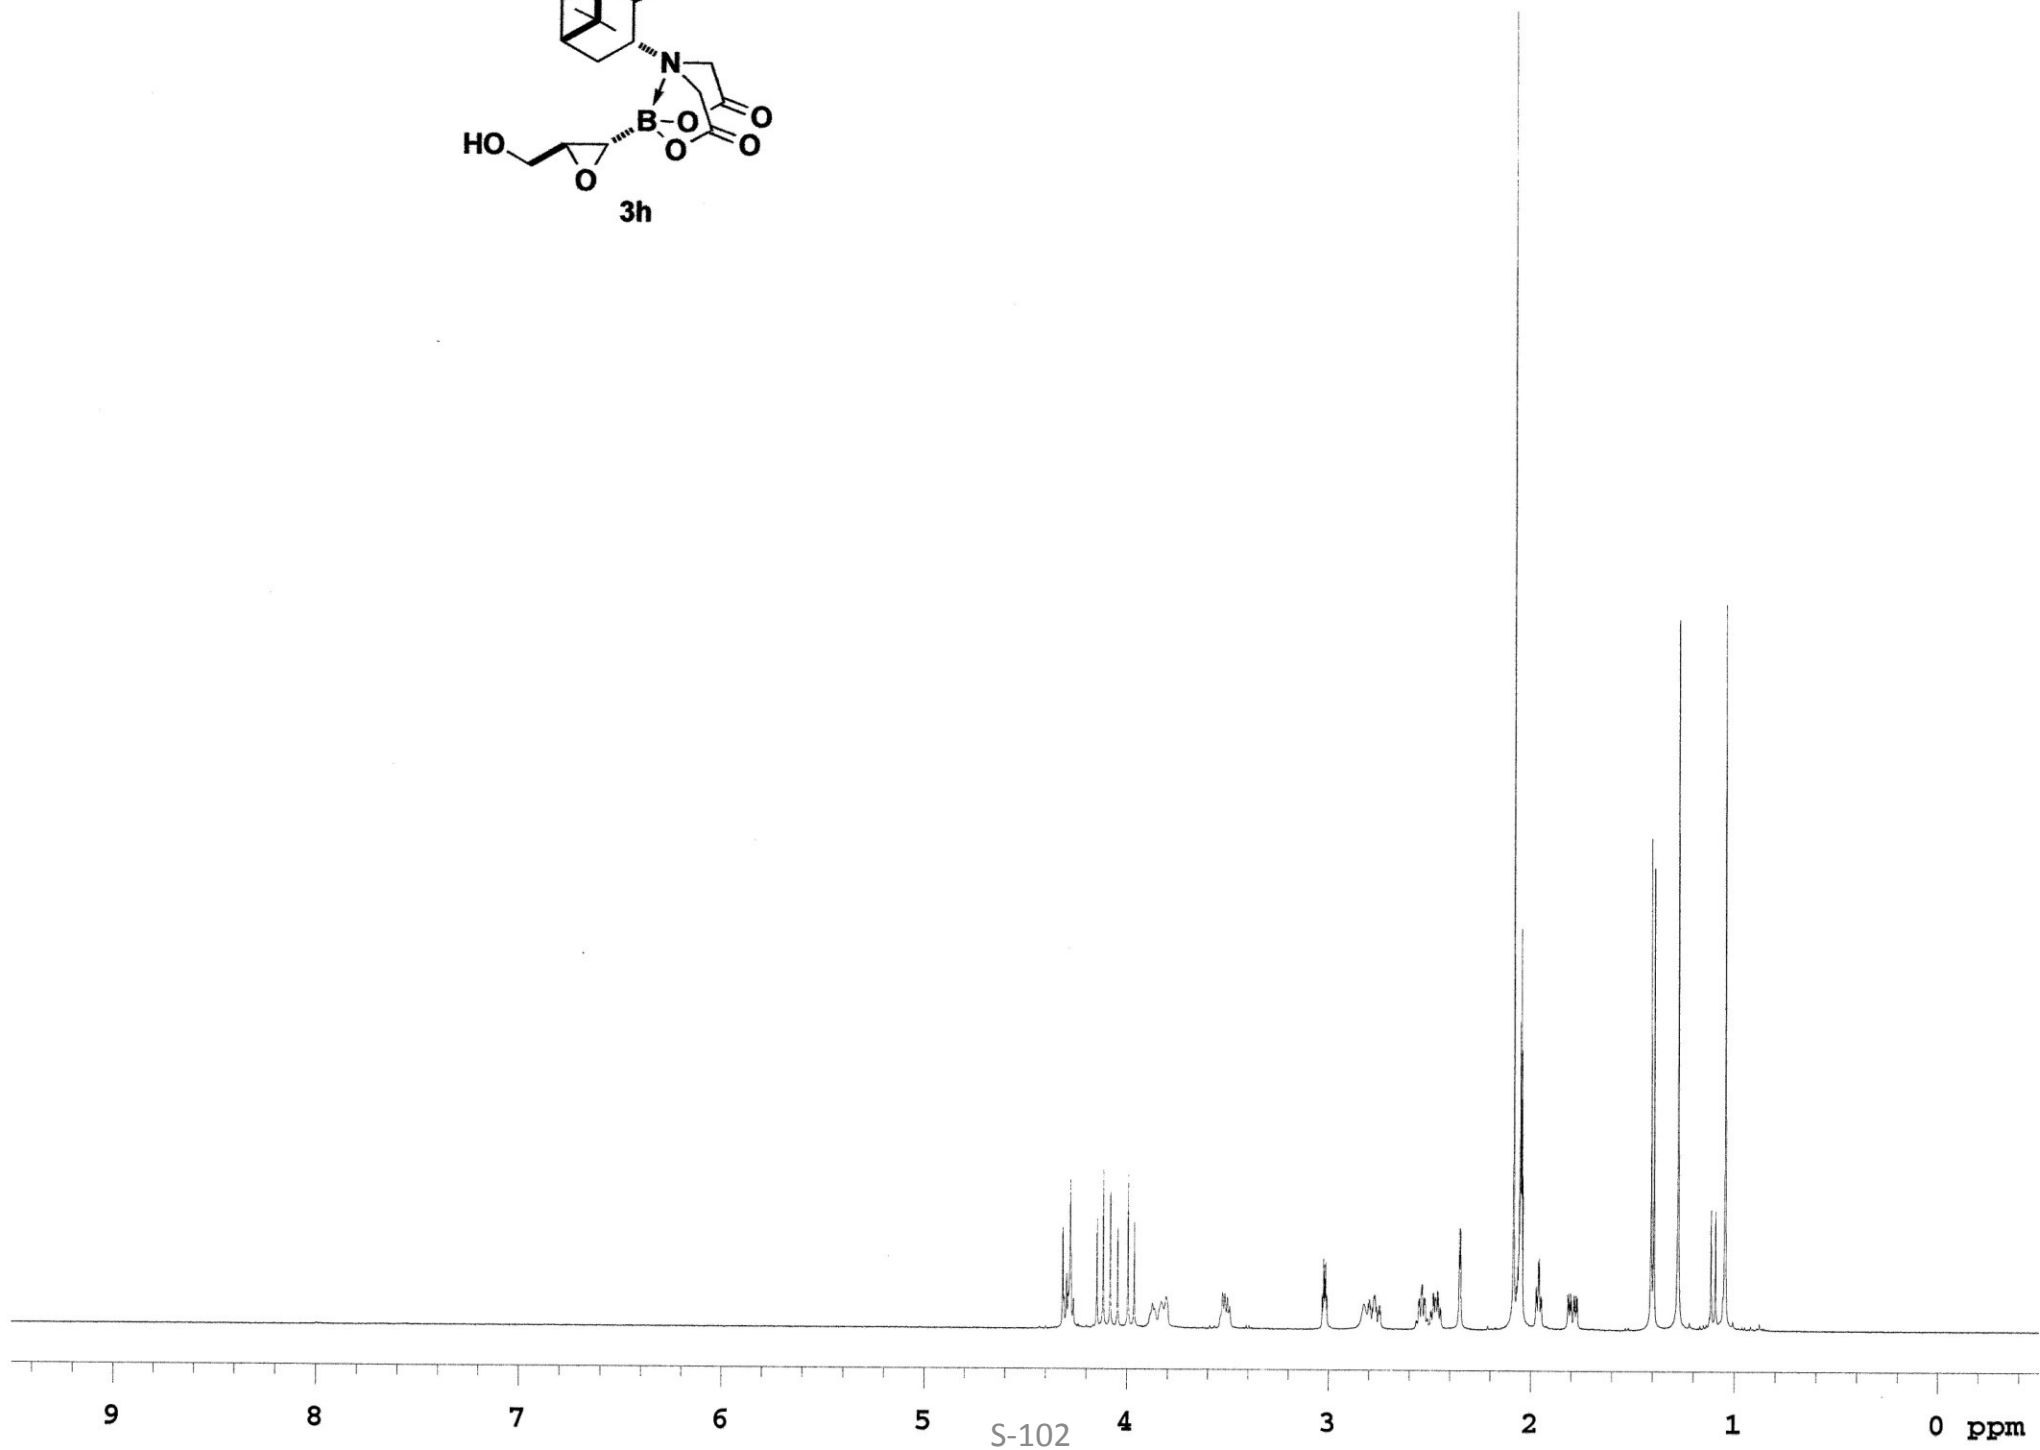

Pulse Sequence: s2pul

Solvent: CDCl3

Ambient temperature

User: 1-14-87

INOVA-500 "u500"

Relax. delay 1.000 sec

Pulse 42.4 degrees

Acq. time 1.086 sec

Width 30165.9 Hz

592 repetitions

OBSERVE C13, 125.6473166 MHz

DECOUPLE H1, 499.6923275 MHz

Power 44 dB

continuously on

WALTZ-16 modulated

DATA PROCESSING

Line broadening 1.0 Hz

FT size 65536

Total time 34 min, 57 sec

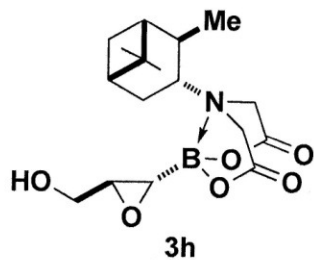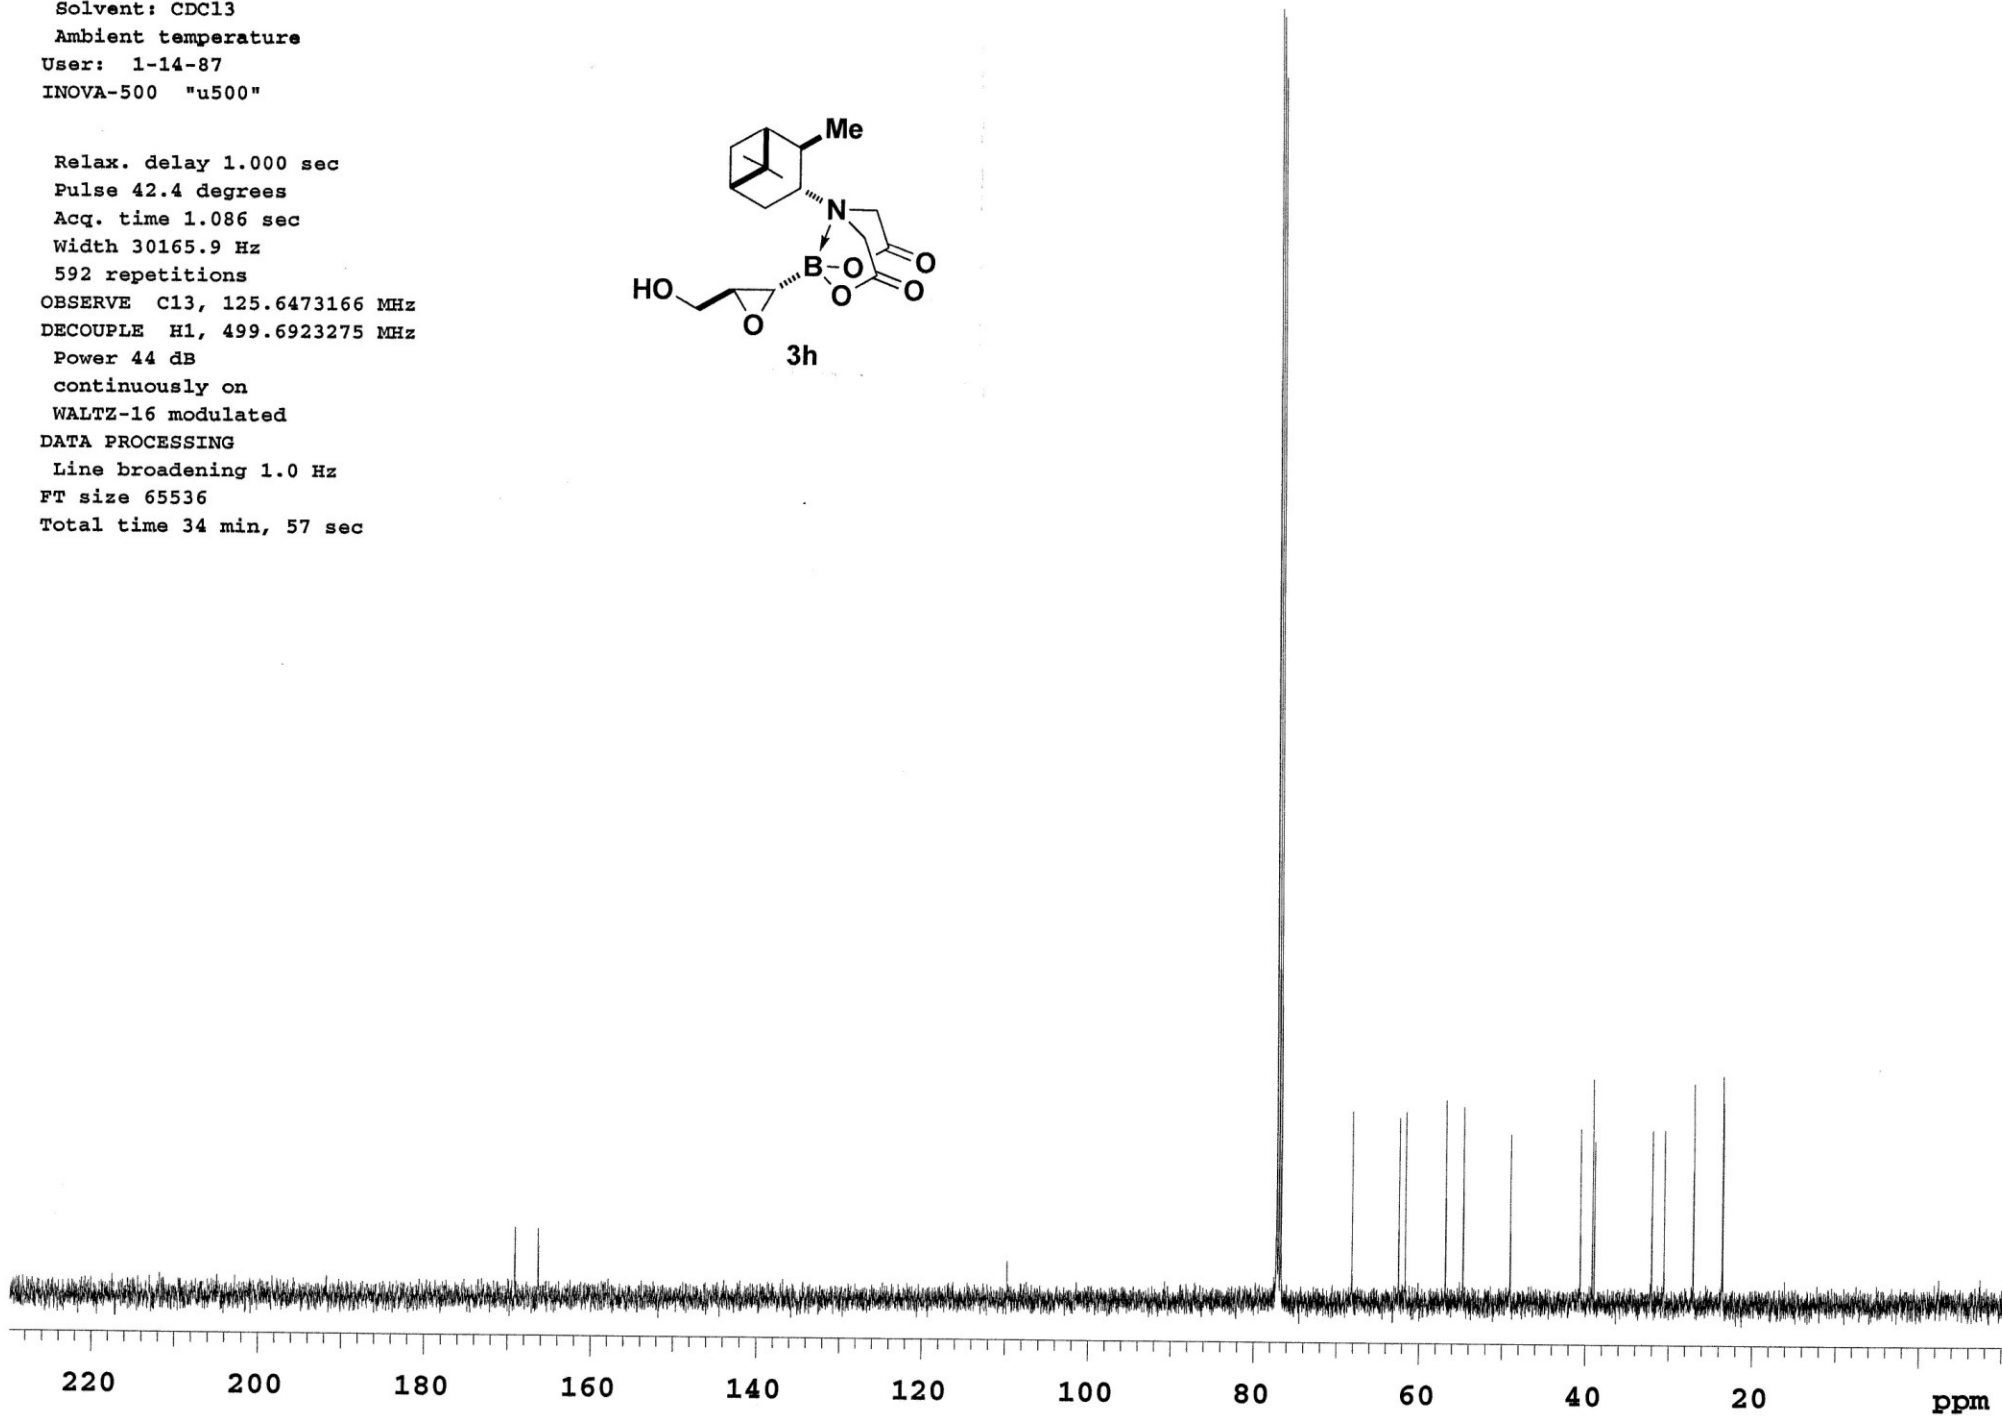

Pulse Sequence: s2pul

Solvent: CDCl3

Temp. 20.0 C / 293.1 K

INOVA-500 "vxr500"

Relax. delay 10.000 sec

Pulse 45.0 degrees

Acq. time 4.096 sec

Width 8000.0 Hz

32 repetitions

OBSERVE H1, 499.4298987 MHz

DATA PROCESSING

Line broadening 0.3 Hz

FT size 65536

Total time 7 min, 31 sec

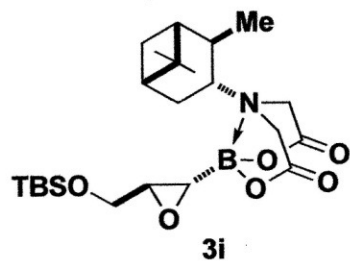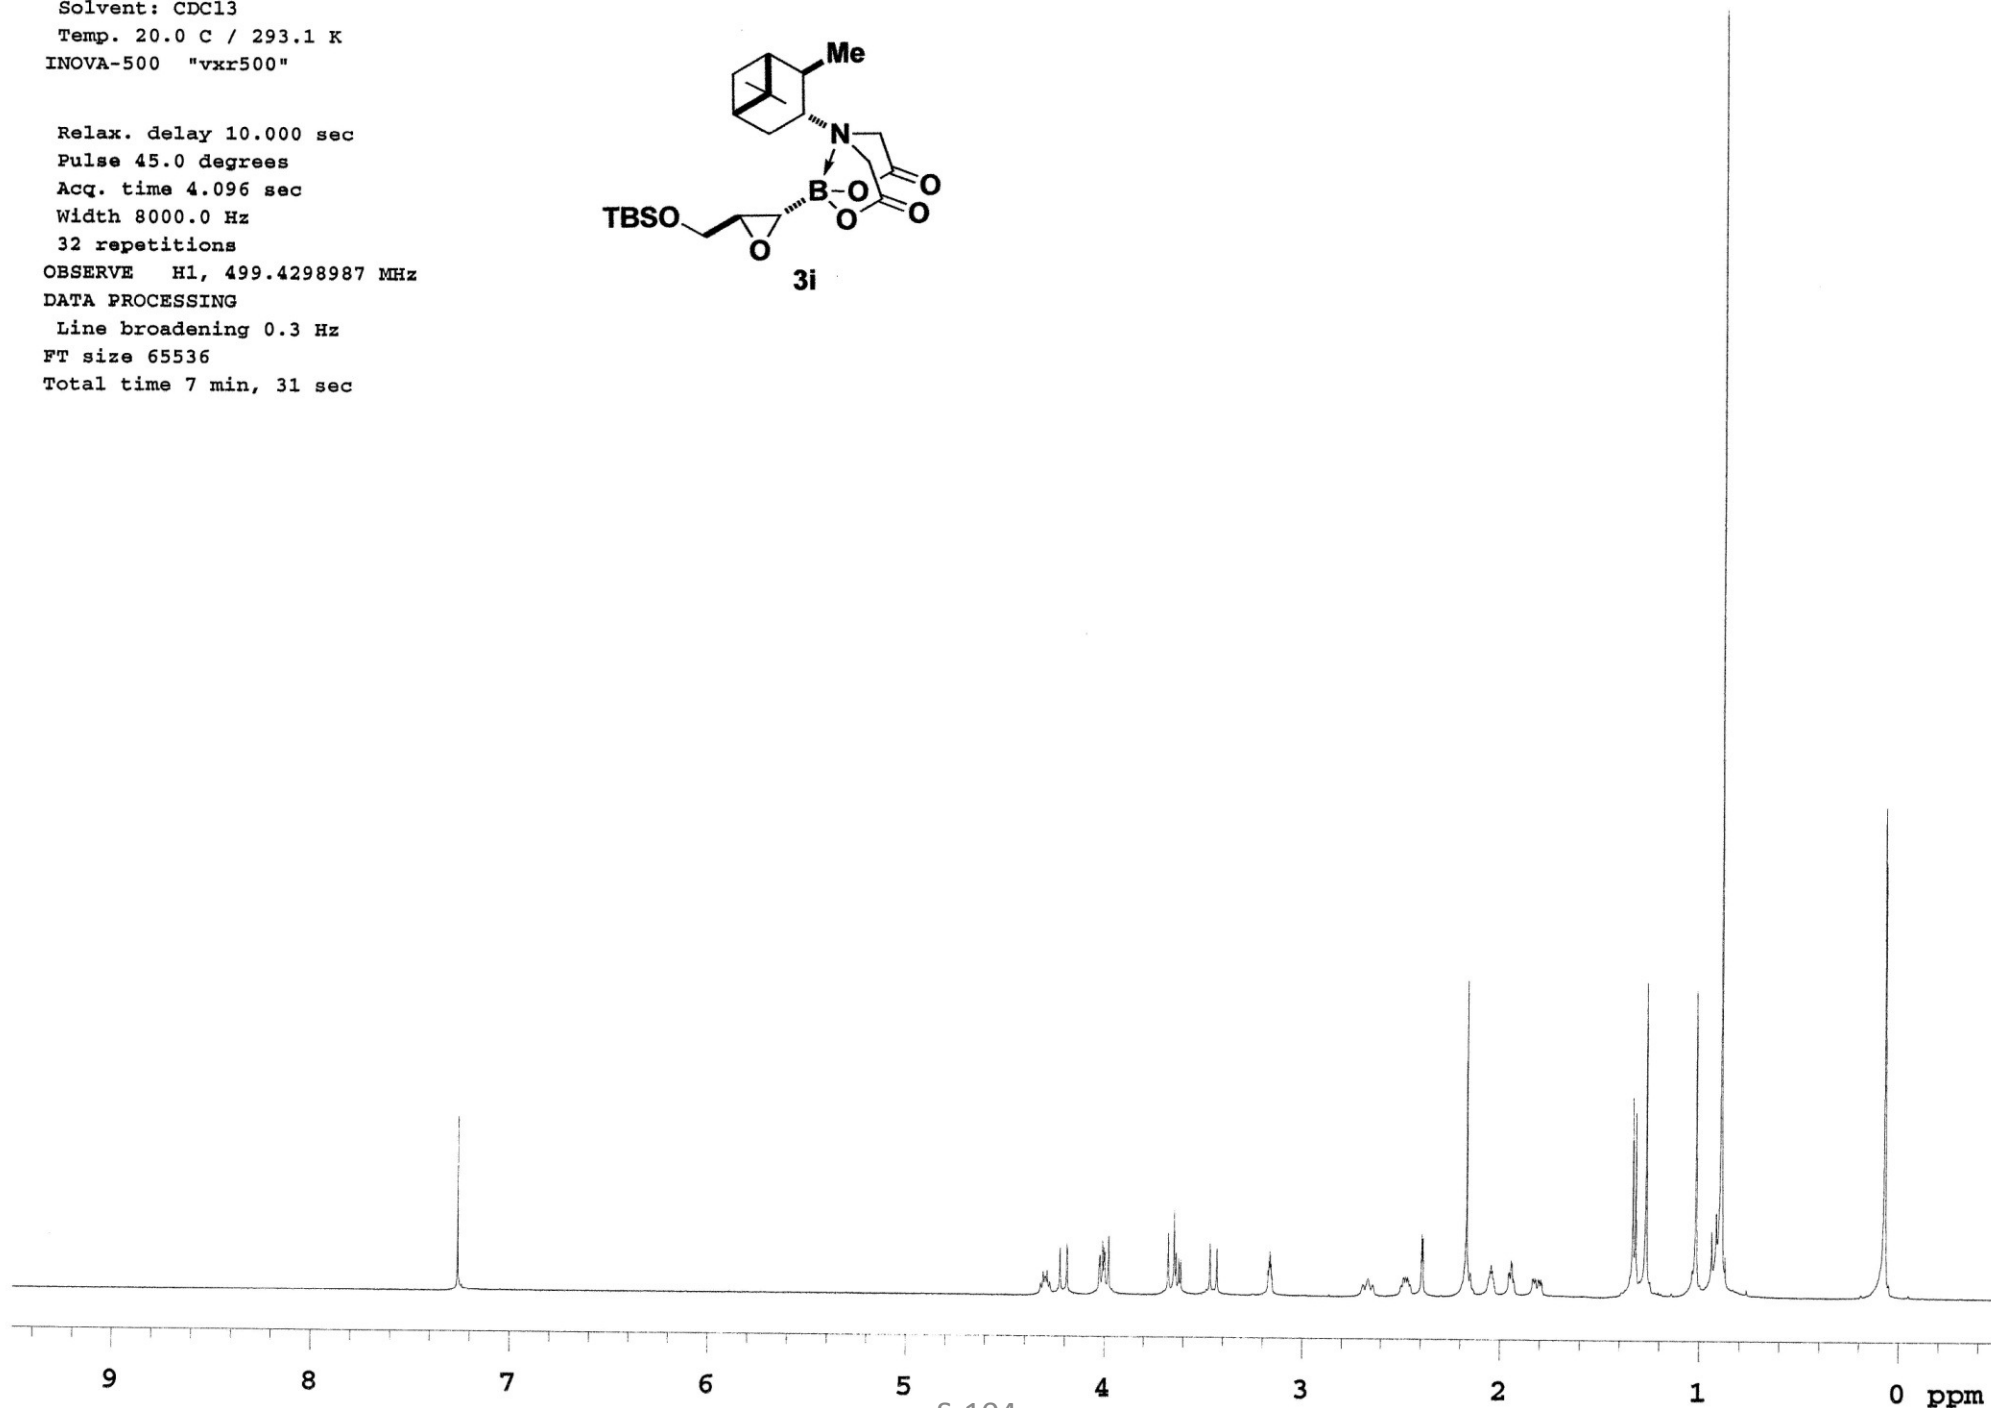



Pulse Sequence: s2pul

Solvent: CDCl3  
Temp. 20.0 C / 293.1 K  
User: 1-14-87  
INOVA-500 "vvr500"

Relax. delay 1.000 sec  
Pulse 45.0 degrees  
Acq. time 1.024 sec  
Width 32000.0 Hz  
608 repetitions  
OBSERVE C13, 125.5817492 MHz  
DECOUPLE H1, 499.4315638 MHz  
Power 48 dB  
continuously on  
WALTZ-16 modulated  
DATA PROCESSING  
Line broadening 1.0 Hz  
FT size 65536  
Total time 5 hr, 38 min, 51 sec

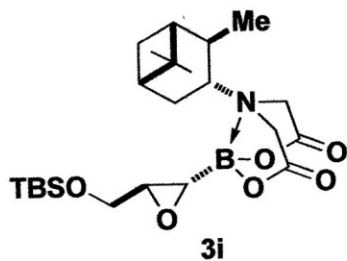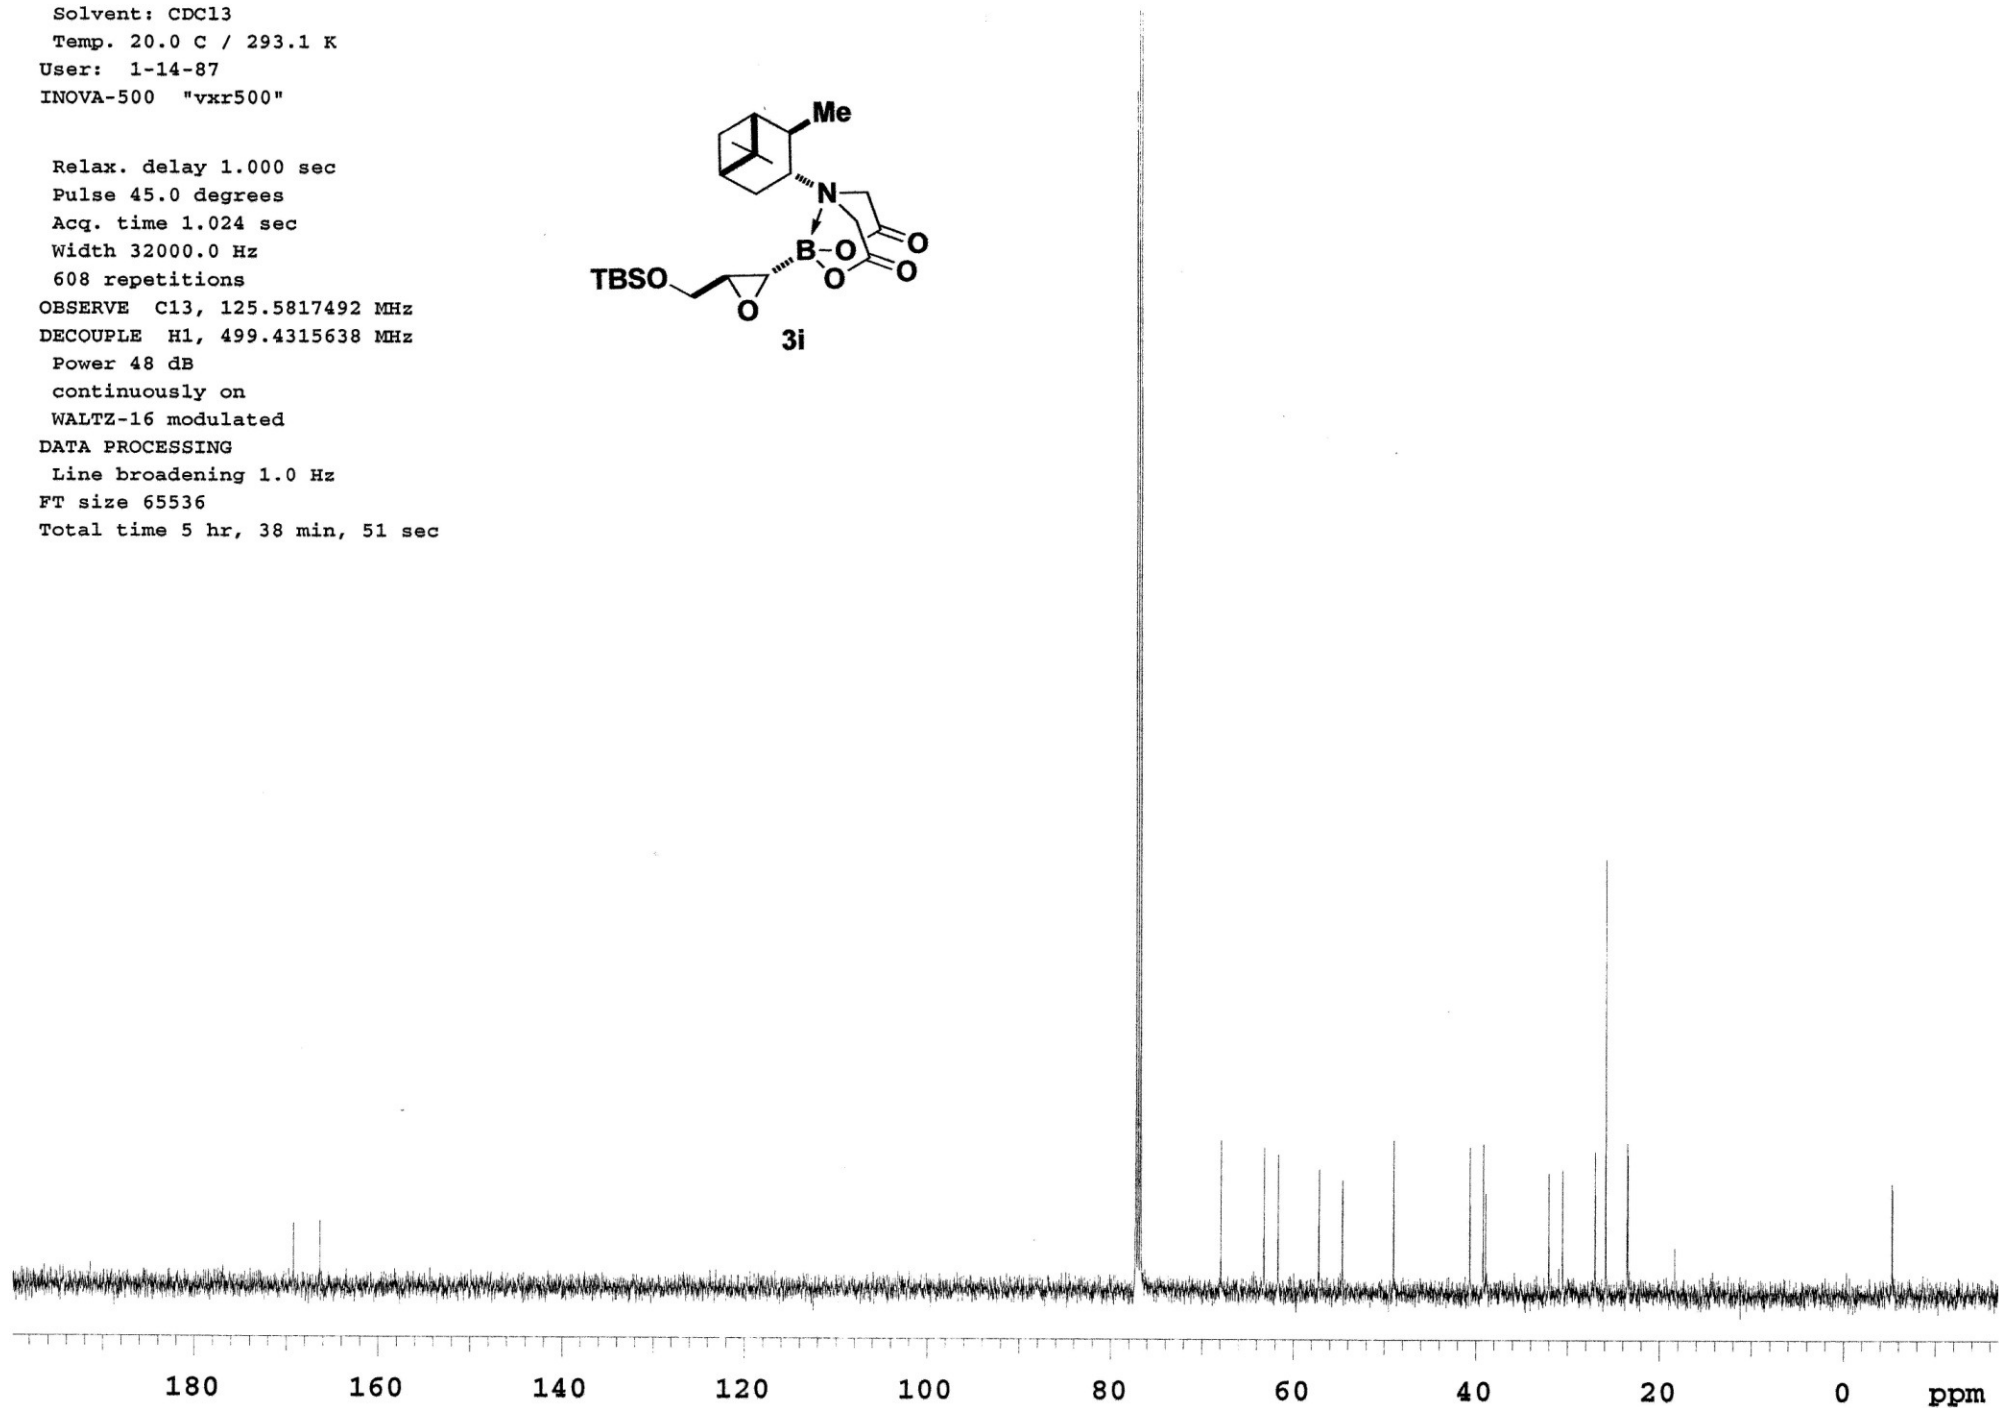

Pulse Sequence: s2pul

Solvent: CDCl3  
Ambient temperature  
INOVA-500 "ui500nb"

Relax. delay 10.000 sec  
Pulse 90.0 degrees  
Acq. time 4.096 sec  
Width 8000.0 Hz  
8 repetitions  
OBSERVE H1, 500.0677744 MHz  
DATA PROCESSING  
Line broadening 0.3 Hz  
FT size 65536  
Total time 1 min, 52 sec

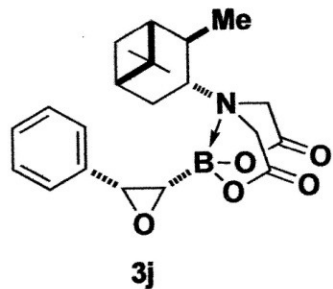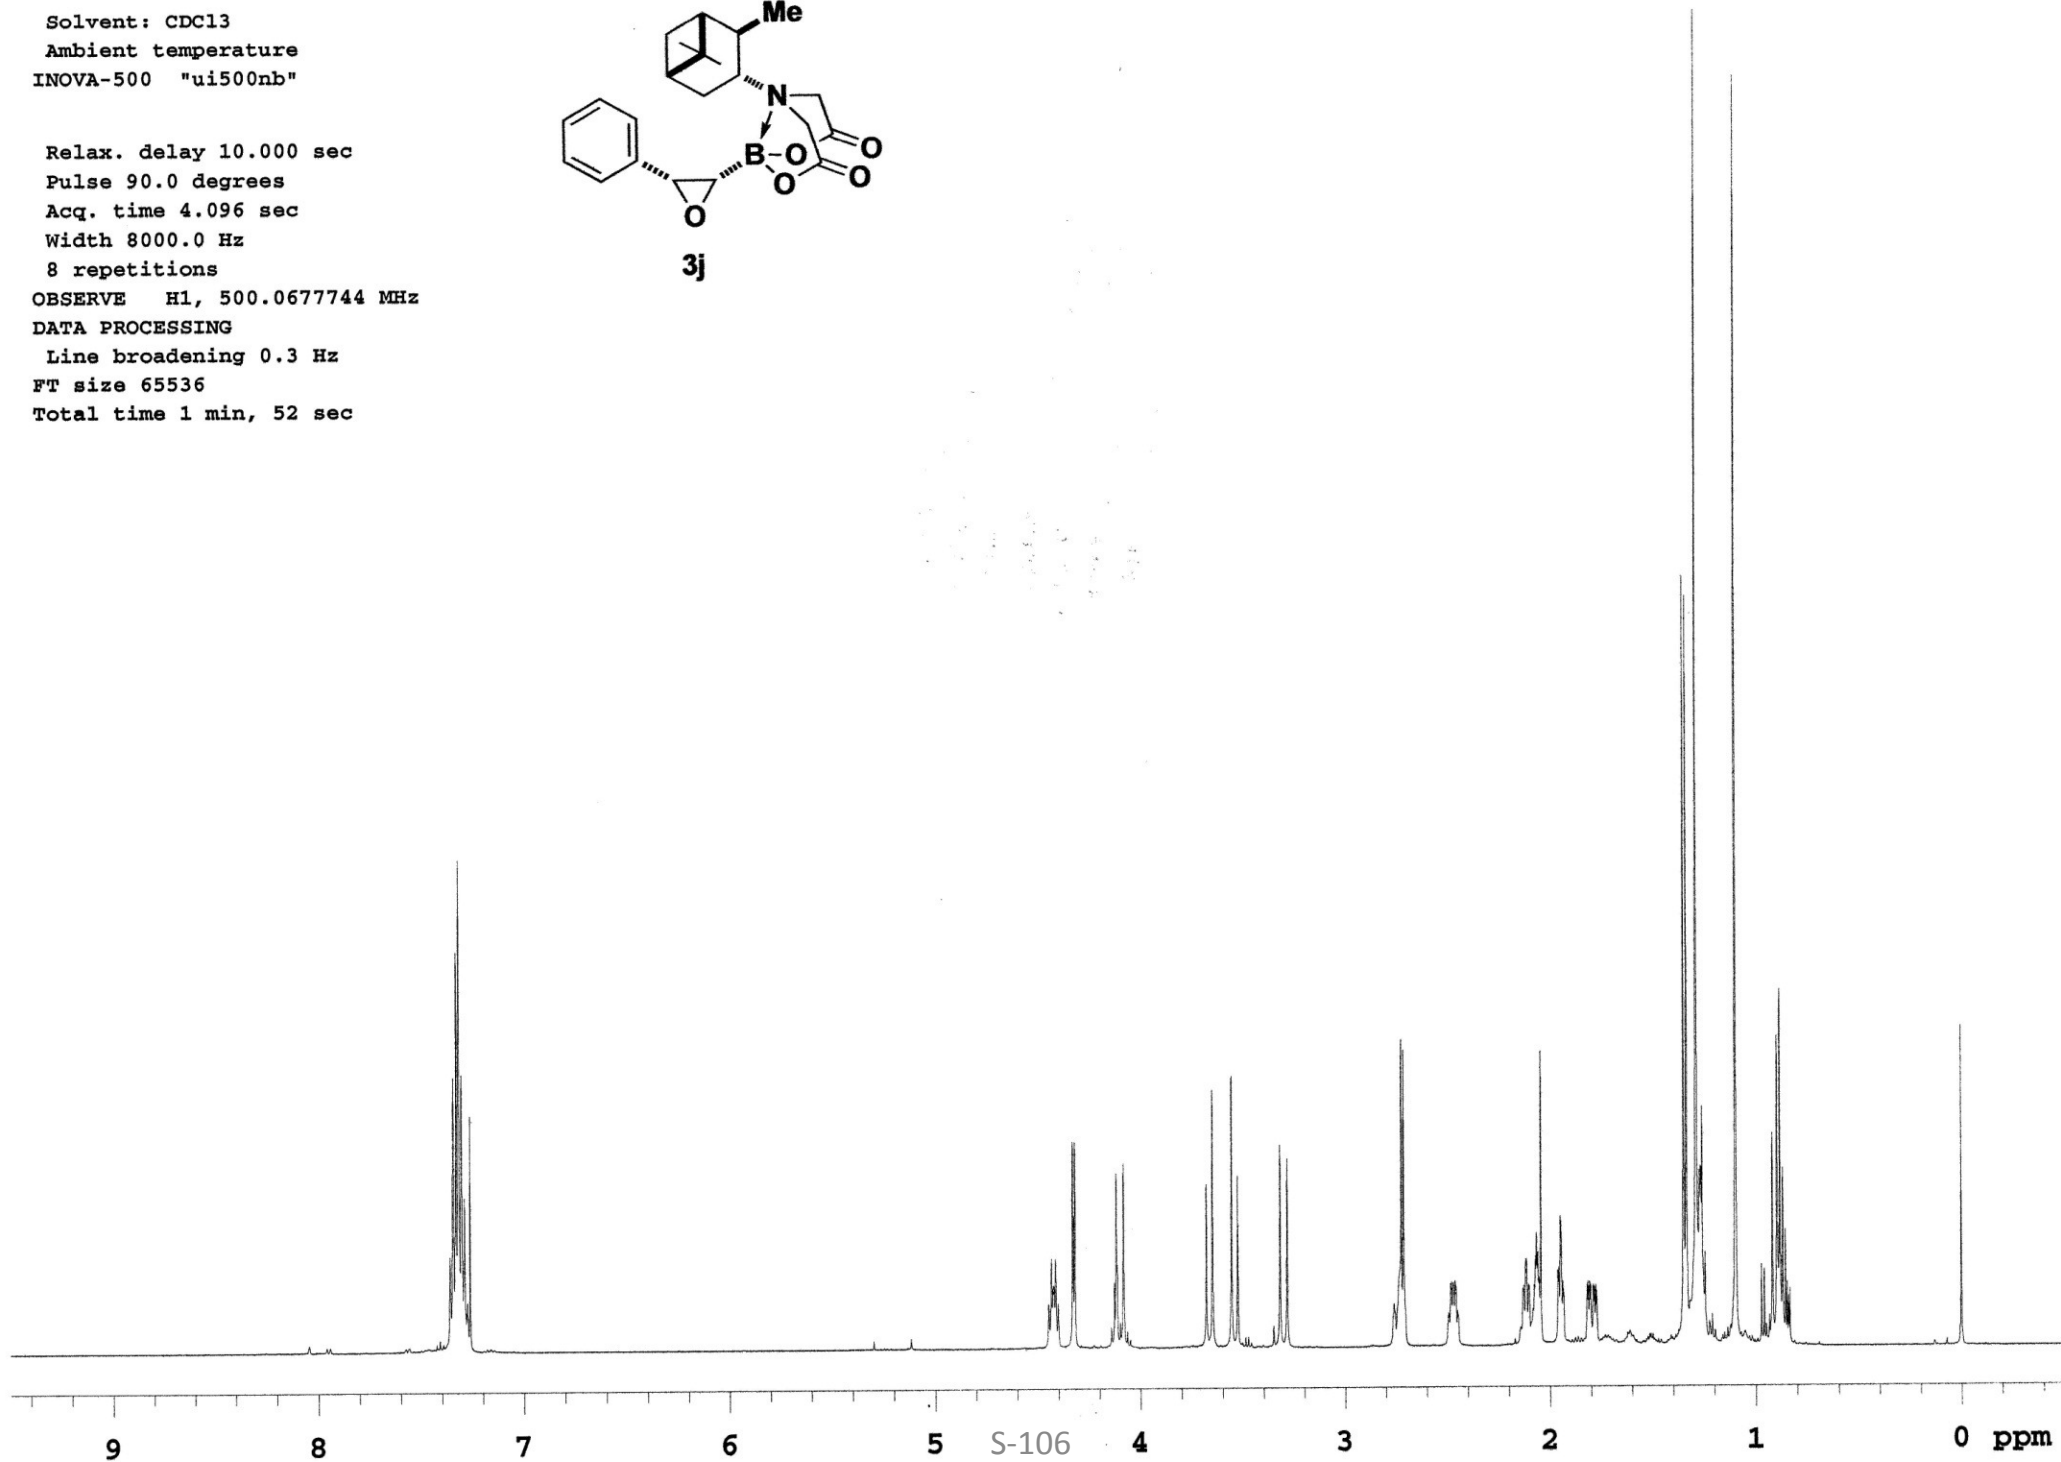

Pulse Sequence: s2pul

Solvent: CDCl3

Ambient temperature

User: 1-14-87

INNOVA-500 "u500"

Relax. delay 1.000 sec

Pulse 42.4 degrees

Acq. time 1.086 sec

Width 30165.9 Hz

624 repetitions

OBSERVE C13, 125.6473193 MHz

DECOUPLE H1, 499.6923275 MHz

Power 44 dB

continuously on

WALTZ-16 modulated

DATA PROCESSING

Line broadening 1.0 Hz

FT size 65536

Total time 5 hr, 49 min, 13 sec

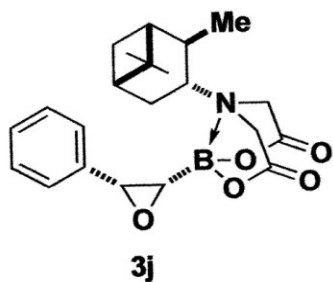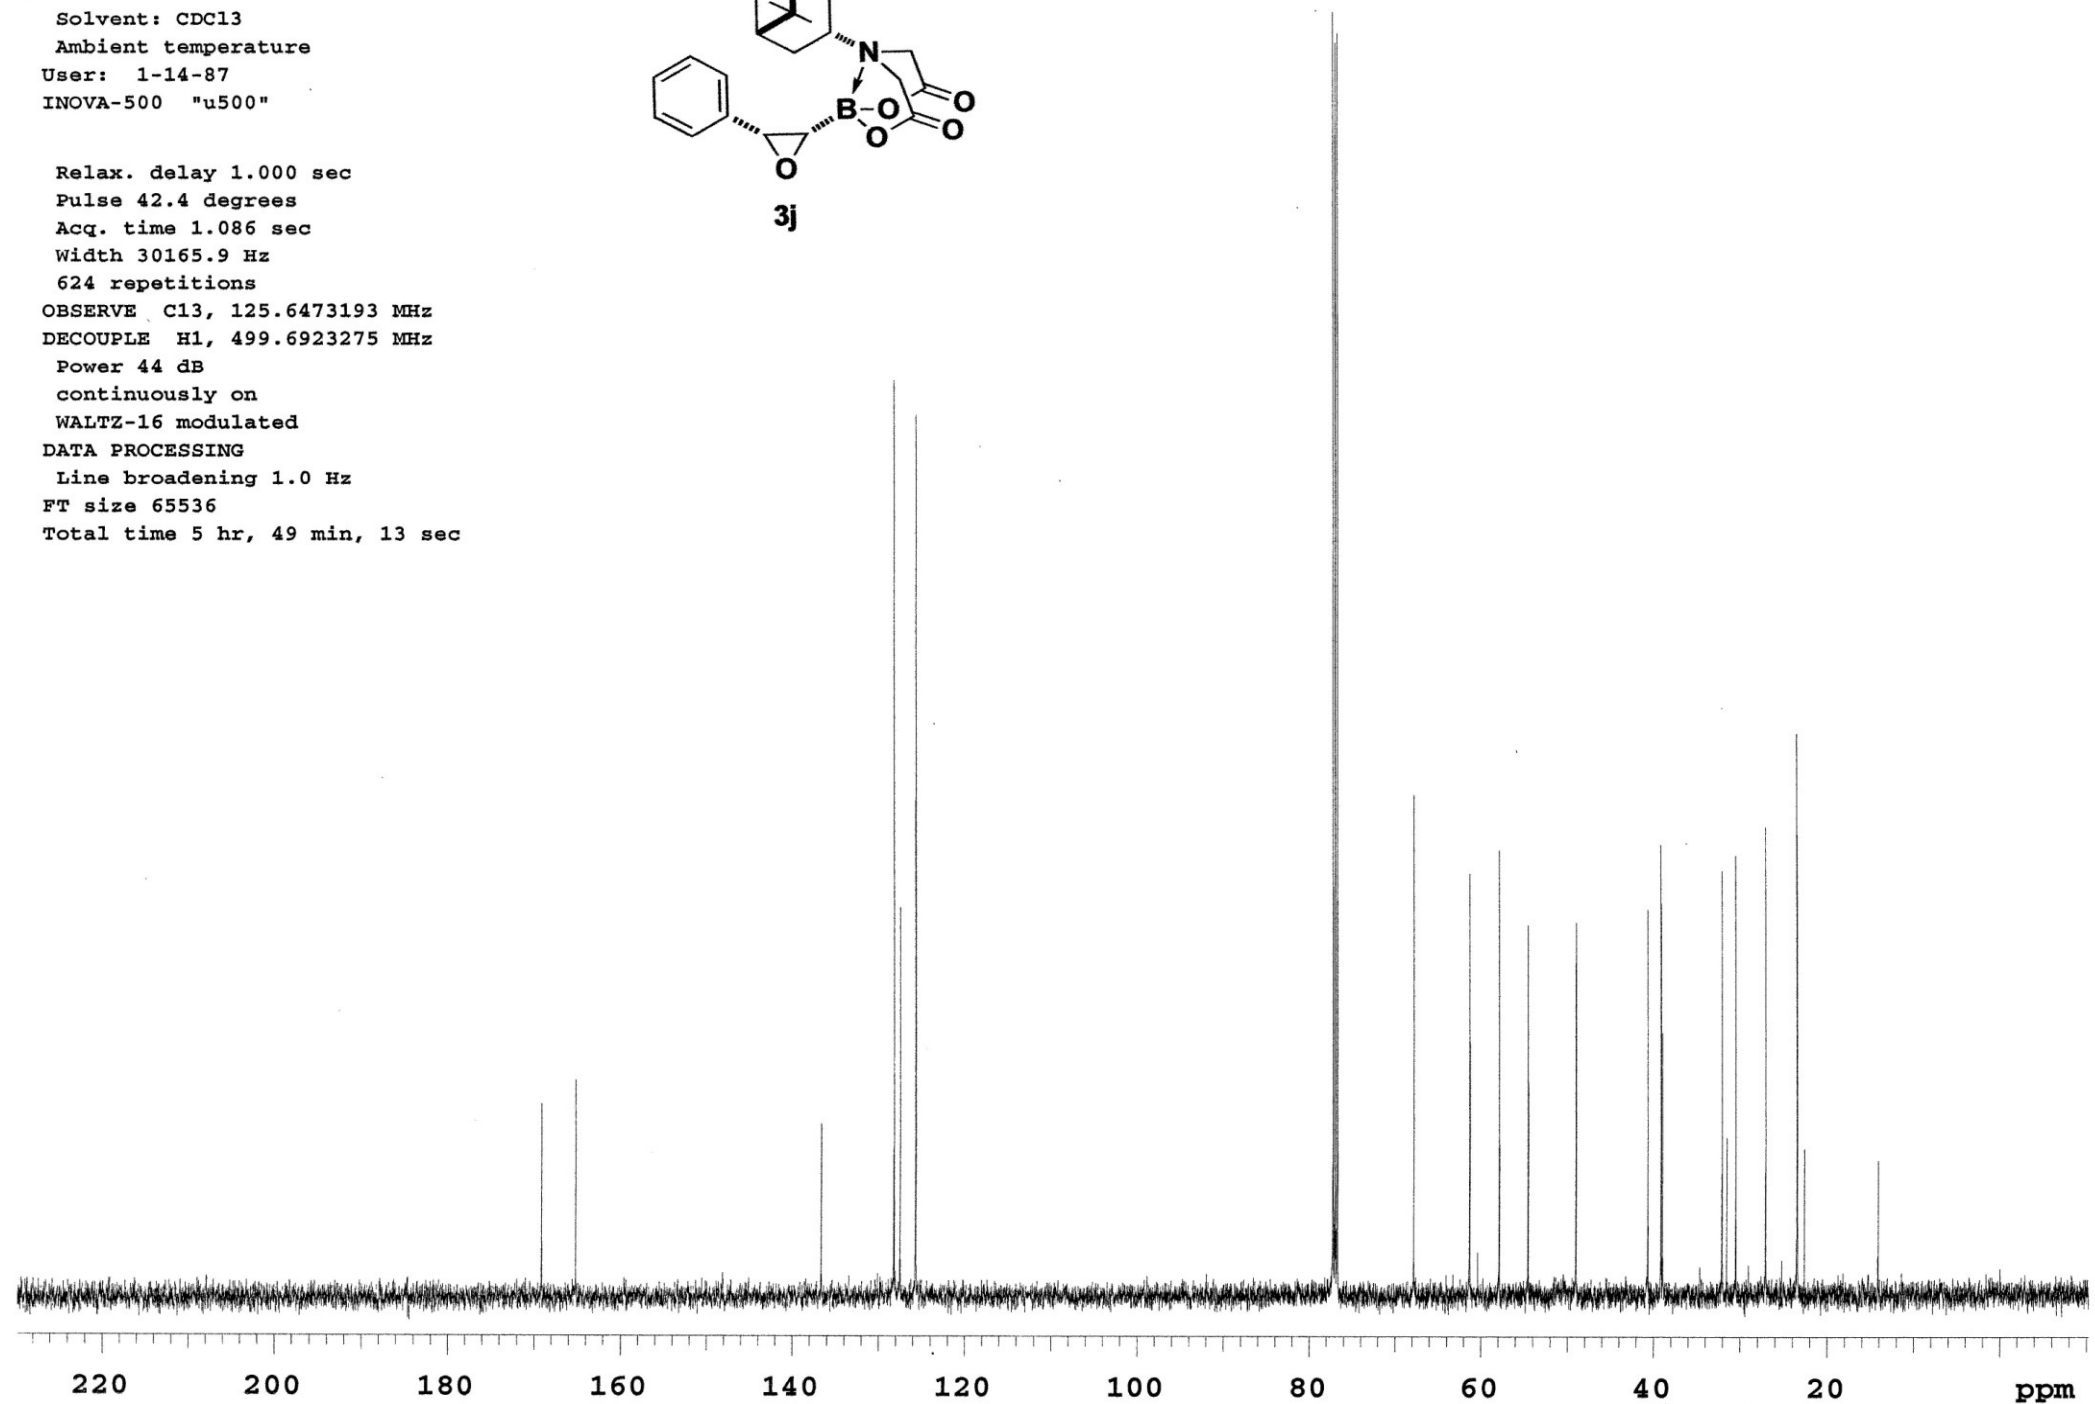

Pulse Sequence: s2pul

Solvent: CDCl3

Ambient temperature

INOVA-500 "vvr500"

Relax. delay 10.000 sec

Pulse 45.0 degrees

Acq. time 4.096 sec

Width 8000.0 Hz

8 repetitions

OBSERVE H1, 499.429895 MHz

DATA PROCESSING

Line broadening 0.3 Hz

FT size 65536

Total time 1 min, 52 sec

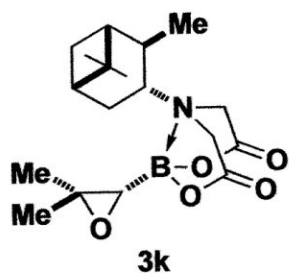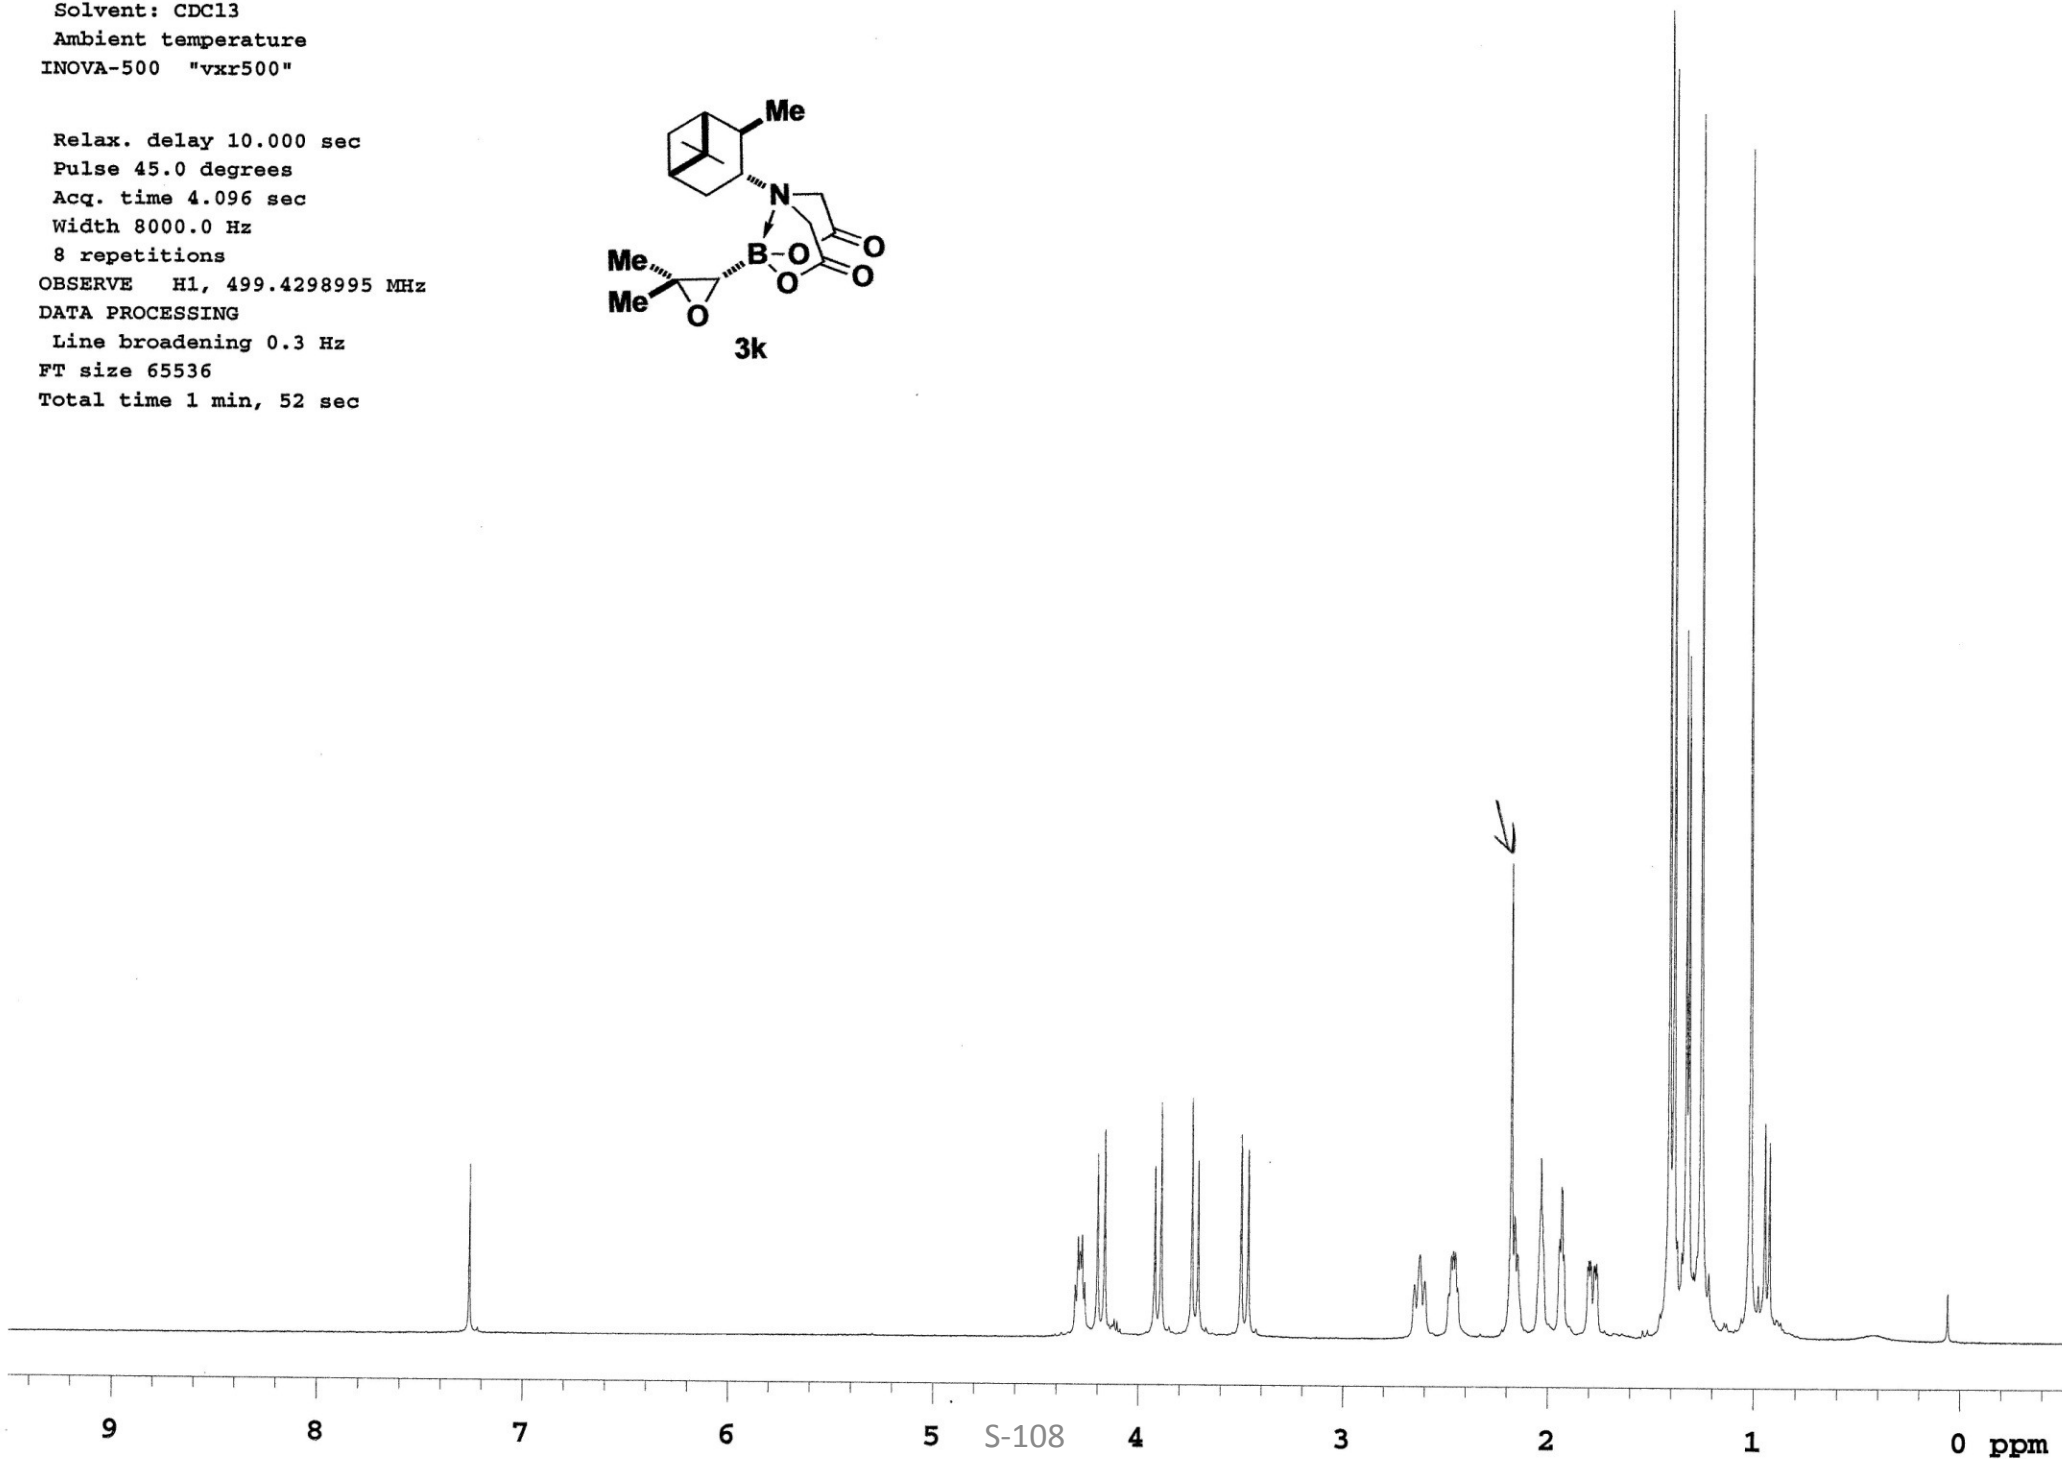

Pulse Sequence: s2pul

Solvent: CDCl3

Ambient temperature

User: 1-14-87

INOVA-500 "vkr500"

Relax. delay 1.000 sec

Pulse 45.0 degrees

Acq. time 1.024 sec

Width 32000.0 Hz

384 repetitions

OBSERVE C13, 125.5817166 MHz

DECOUPLE H1, 499.4315638 MHz

Power 48 dB

continuously on

WALTZ-16 modulated

DATA PROCESSING

Line broadening 1.0 Hz

FT size 65536

Total time 33 min, 54 sec

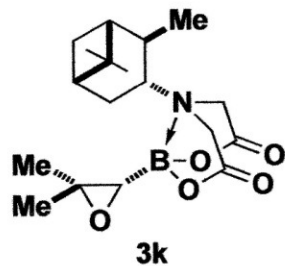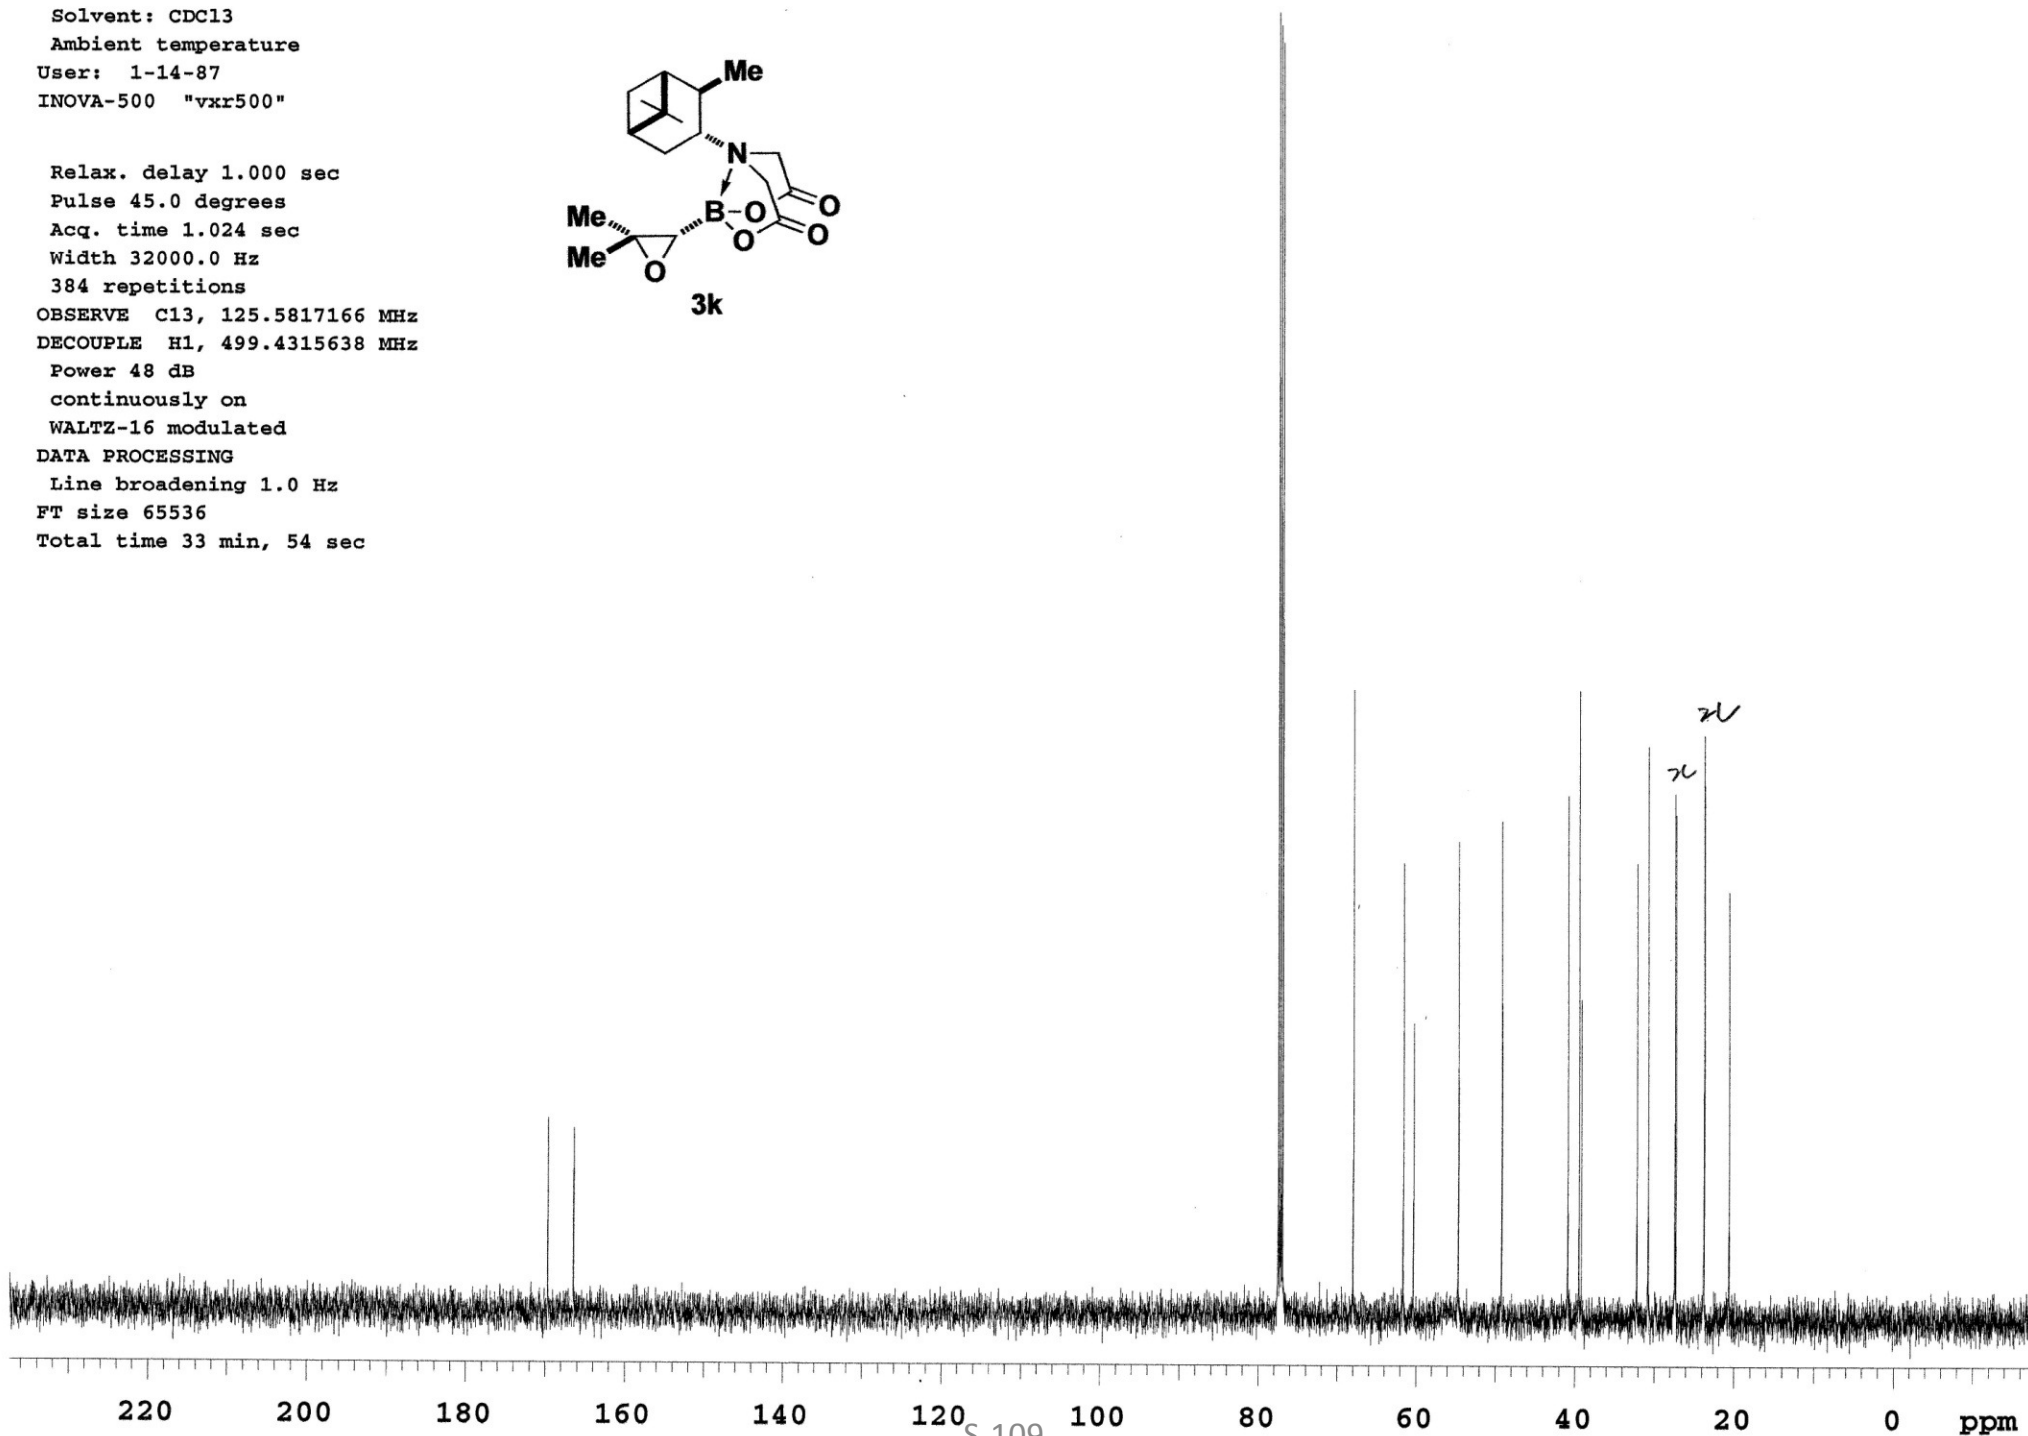

Pulse Sequence: s2pul

Solvent: CDCl3

Ambient temperature

INOVA-500 "ui500nb"

Relax. delay 10.000 sec

Pulse 90.0 degrees

Acq. time 4.096 sec

Width 8000.0 Hz

8 repetitions

OBSERVE H1, 500.0677707 MHz

DATA PROCESSING

Line broadening 0.3 Hz

FT size 65536

Total time 1 min, 52 sec

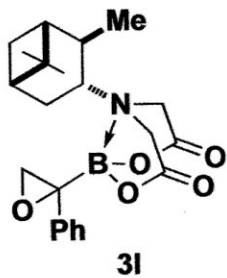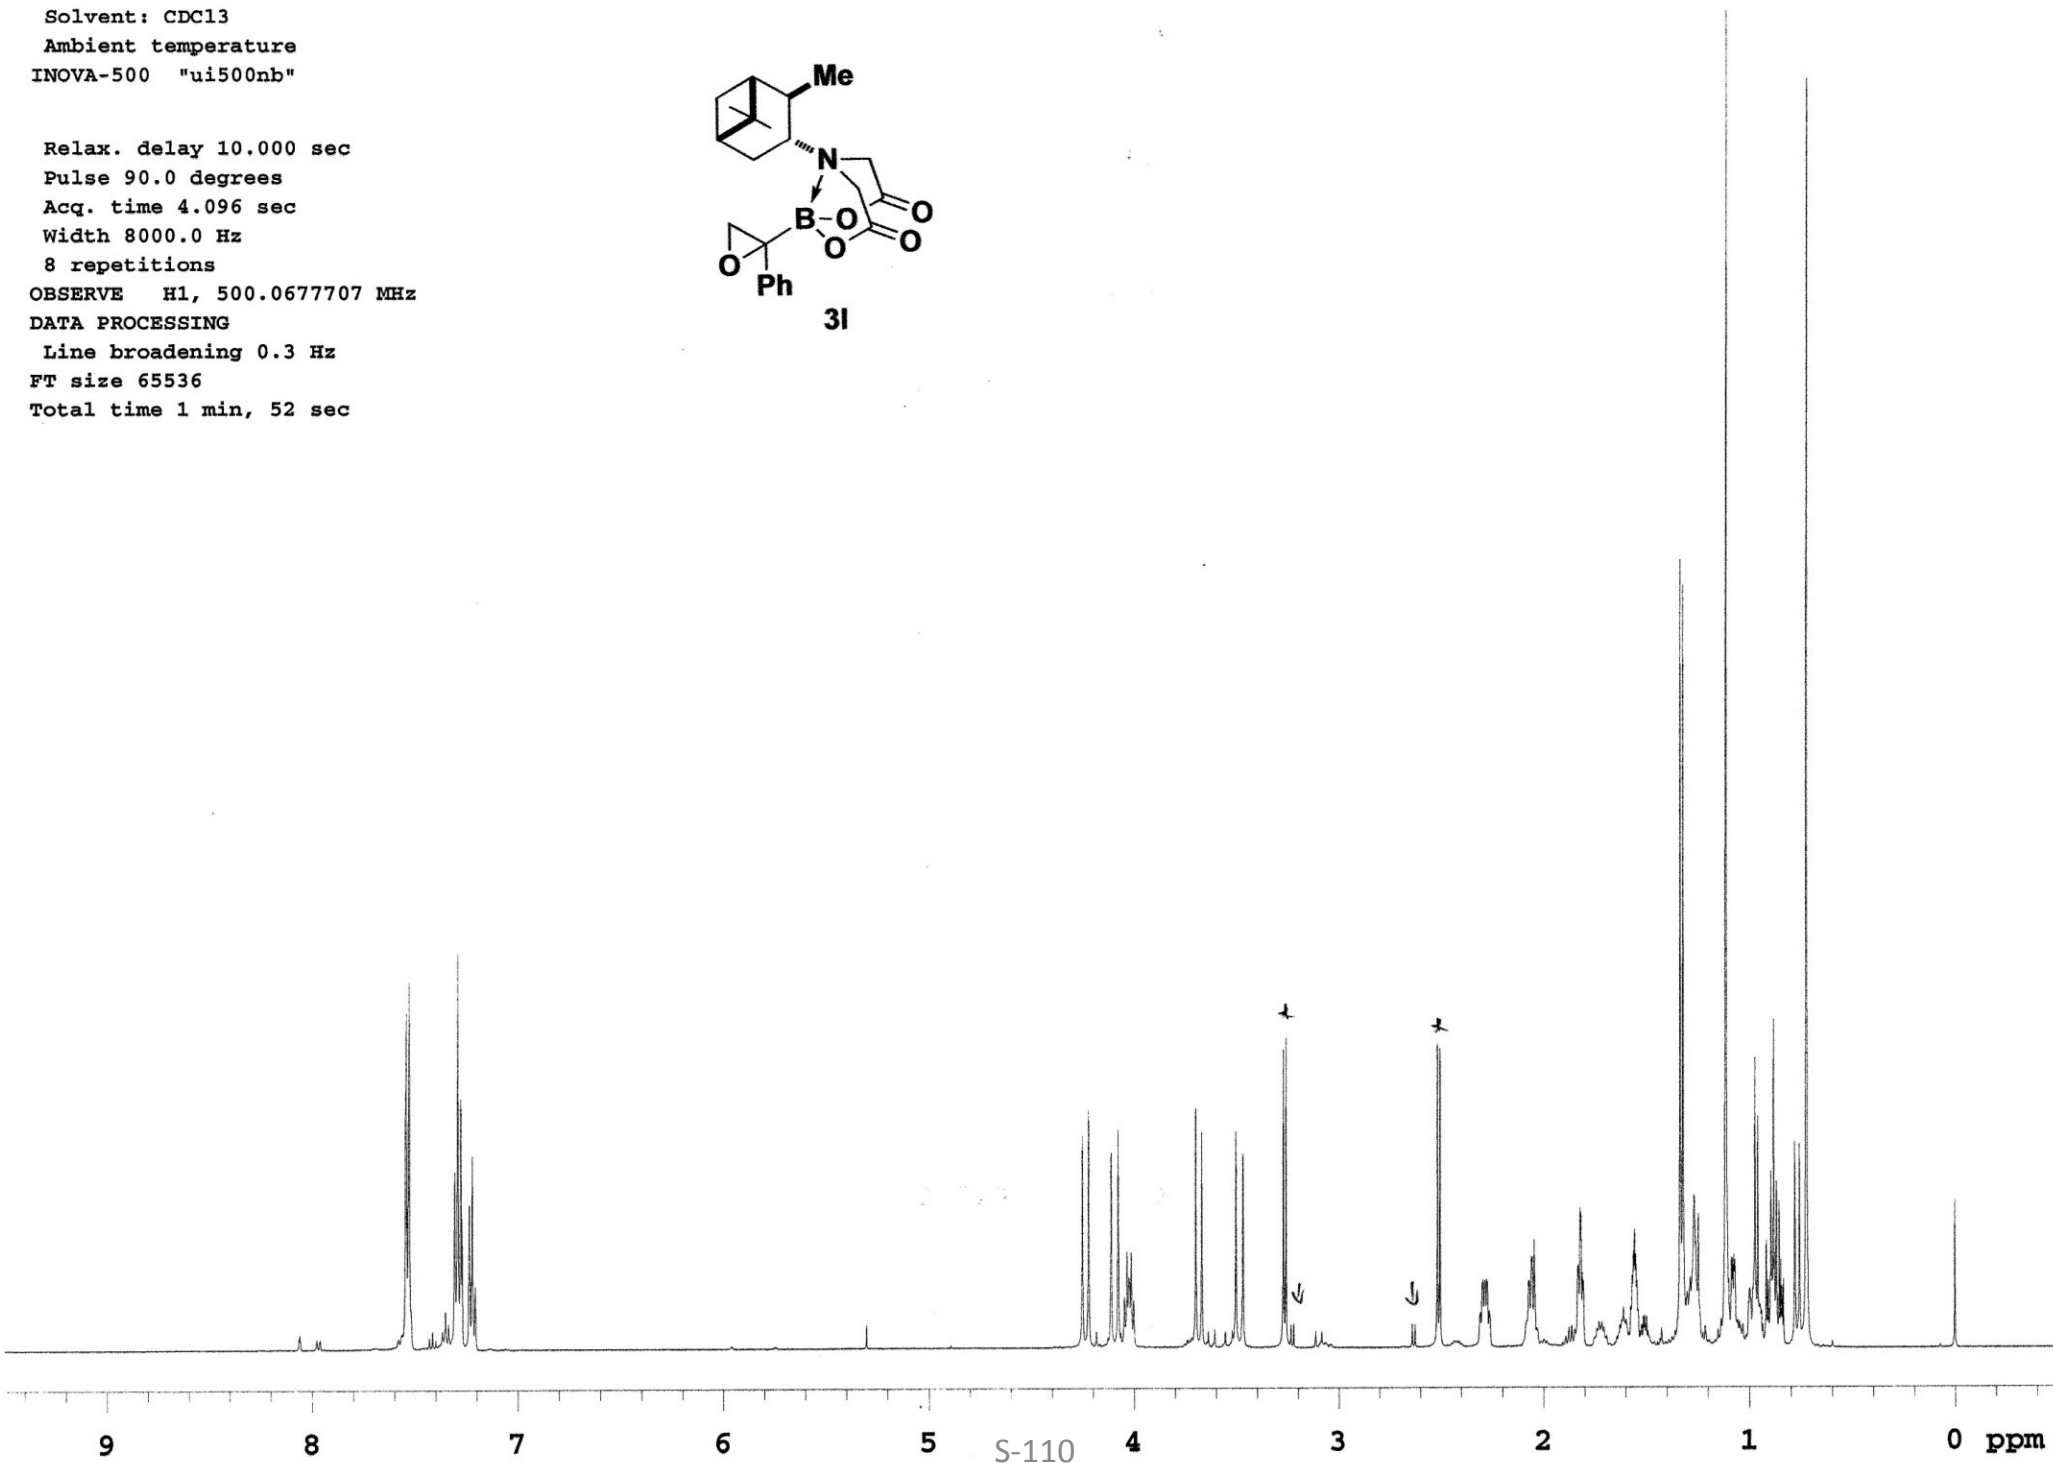

Pulse Sequence: s2pul

Solvent: CDC13  
Ambient temperature  
User: 1-14-87  
INOVA-500 "vvr500"

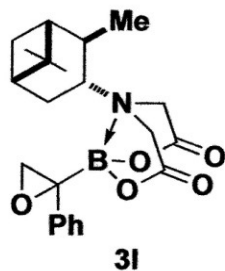

Relax. delay 1.000 sec  
Pulse 45.0 degrees  
Acq. time 1.024 sec  
Width 32000.0 Hz  
256 repetitions  
OBSERVE C13, 125.5817166 MHz  
DECOUPLE H1, 499.4315638 MHz  
Power 48 dB  
continuously on  
WALTZ-16 modulated  
DATA PROCESSING  
Line broadening 1.0 Hz  
FT size 65536  
Total time 33 min, 54 sec

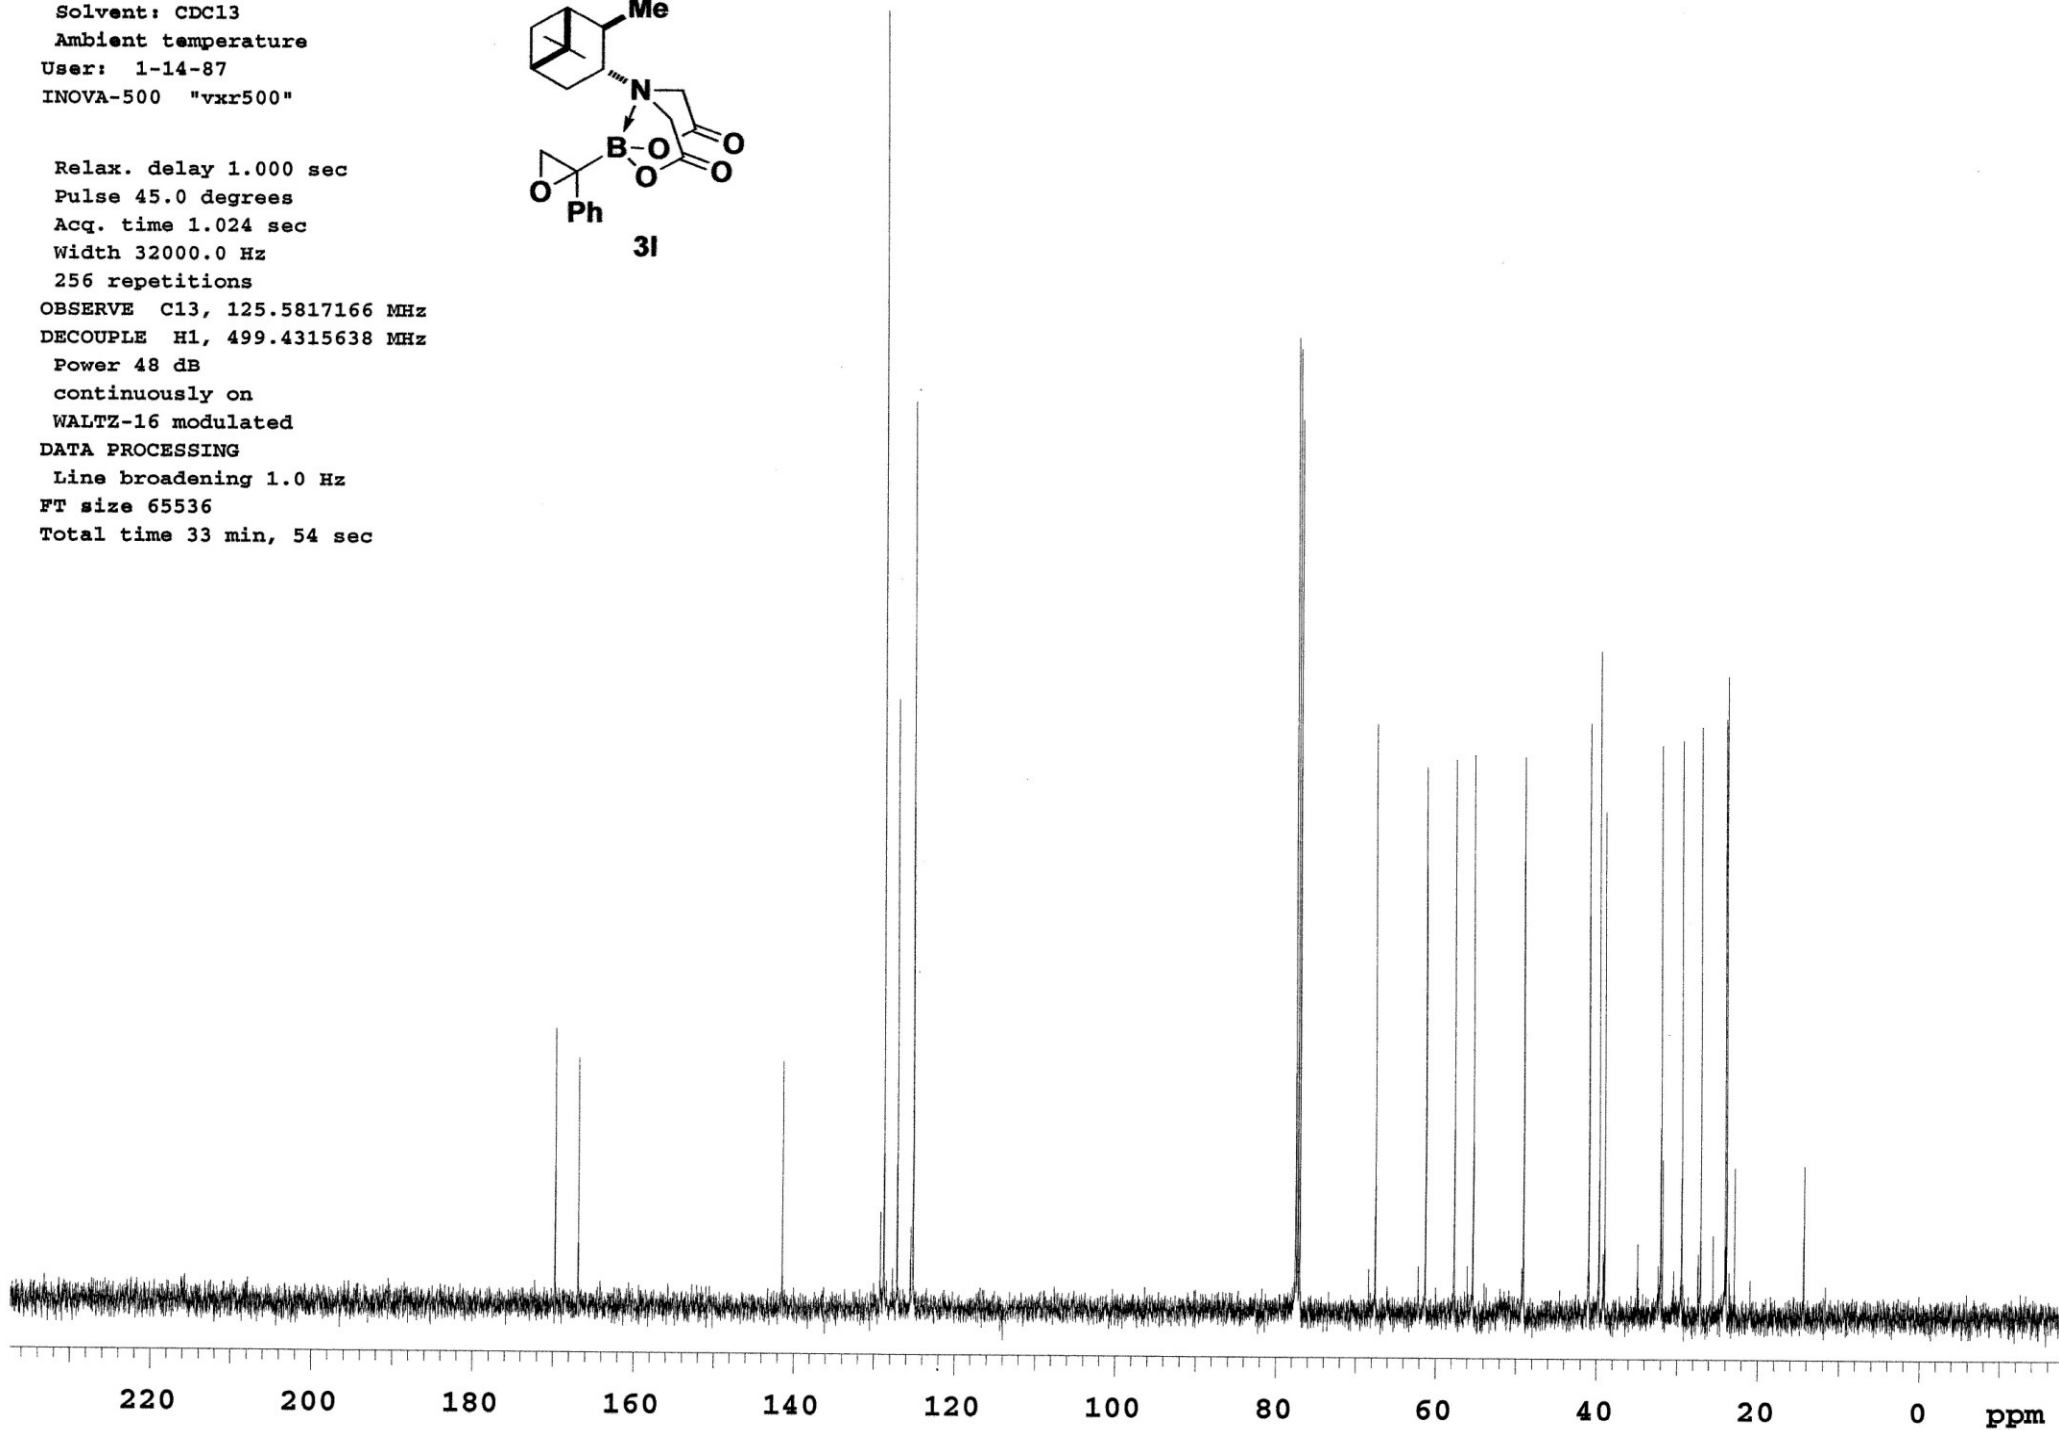

Pulse Sequence: s2pul

Solvent: CDCl3  
Ambient temperature  
INOVA-500 "vxr500"

Relax. delay 10.000 sec  
Pulse 45.0 degrees  
Acq. time 4.096 sec  
Width 8000.0 Hz  
32 repetitions  
OBSERVE H1, 499.4298997 MHz  
DATA PROCESSING  
Line broadening 0.3 Hz  
FT size 65536  
Total time 7 min, 31 sec

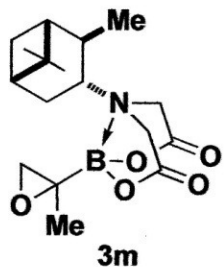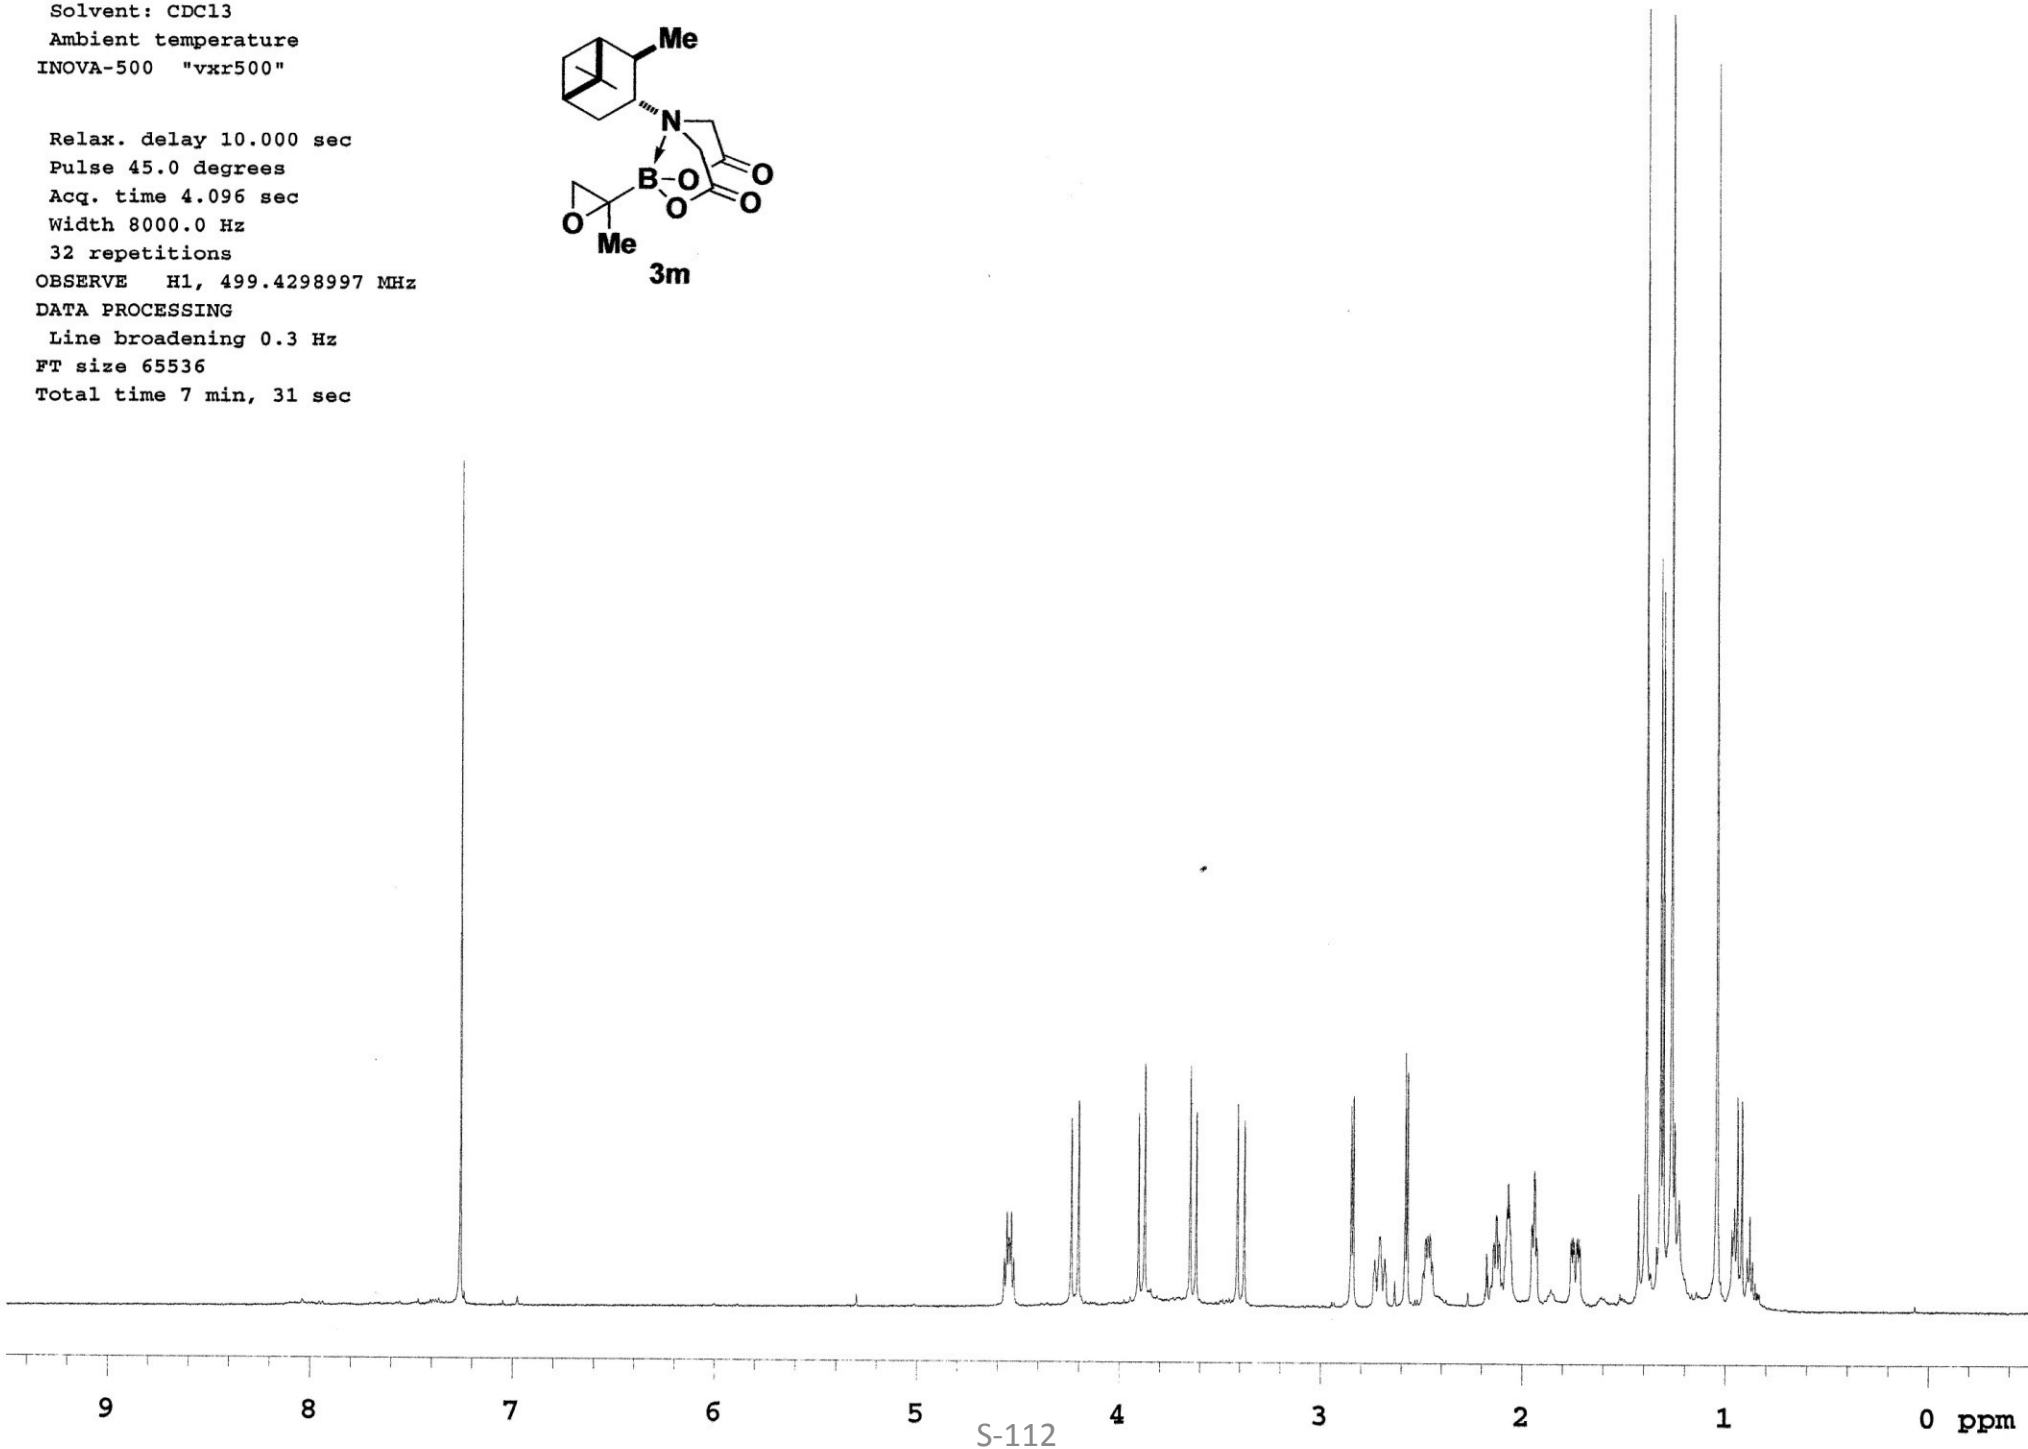



Pulse Sequence: s2pul

Solvent: CDCl<sub>3</sub>

Ambient temperature

User: 1-14-87

INOVA-500 "u500"

Relax. delay 1.000 sec

Pulse 65.9 degrees

Acq. time 1.086 sec

Width 30165.9 Hz

1120 repetitions

OBSERVE C13, 125.6473175 MHz

DECOUPLE H1, 499.6923275 MHz

Power 44 dB

continuously on

WALTZ-16 modulated

DATA PROCESSING

Line broadening 1.0 Hz

FT size 65536

Total time 5 hr, 49 min, 13 sec

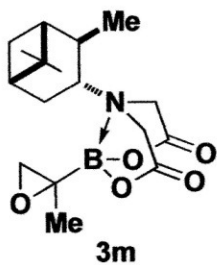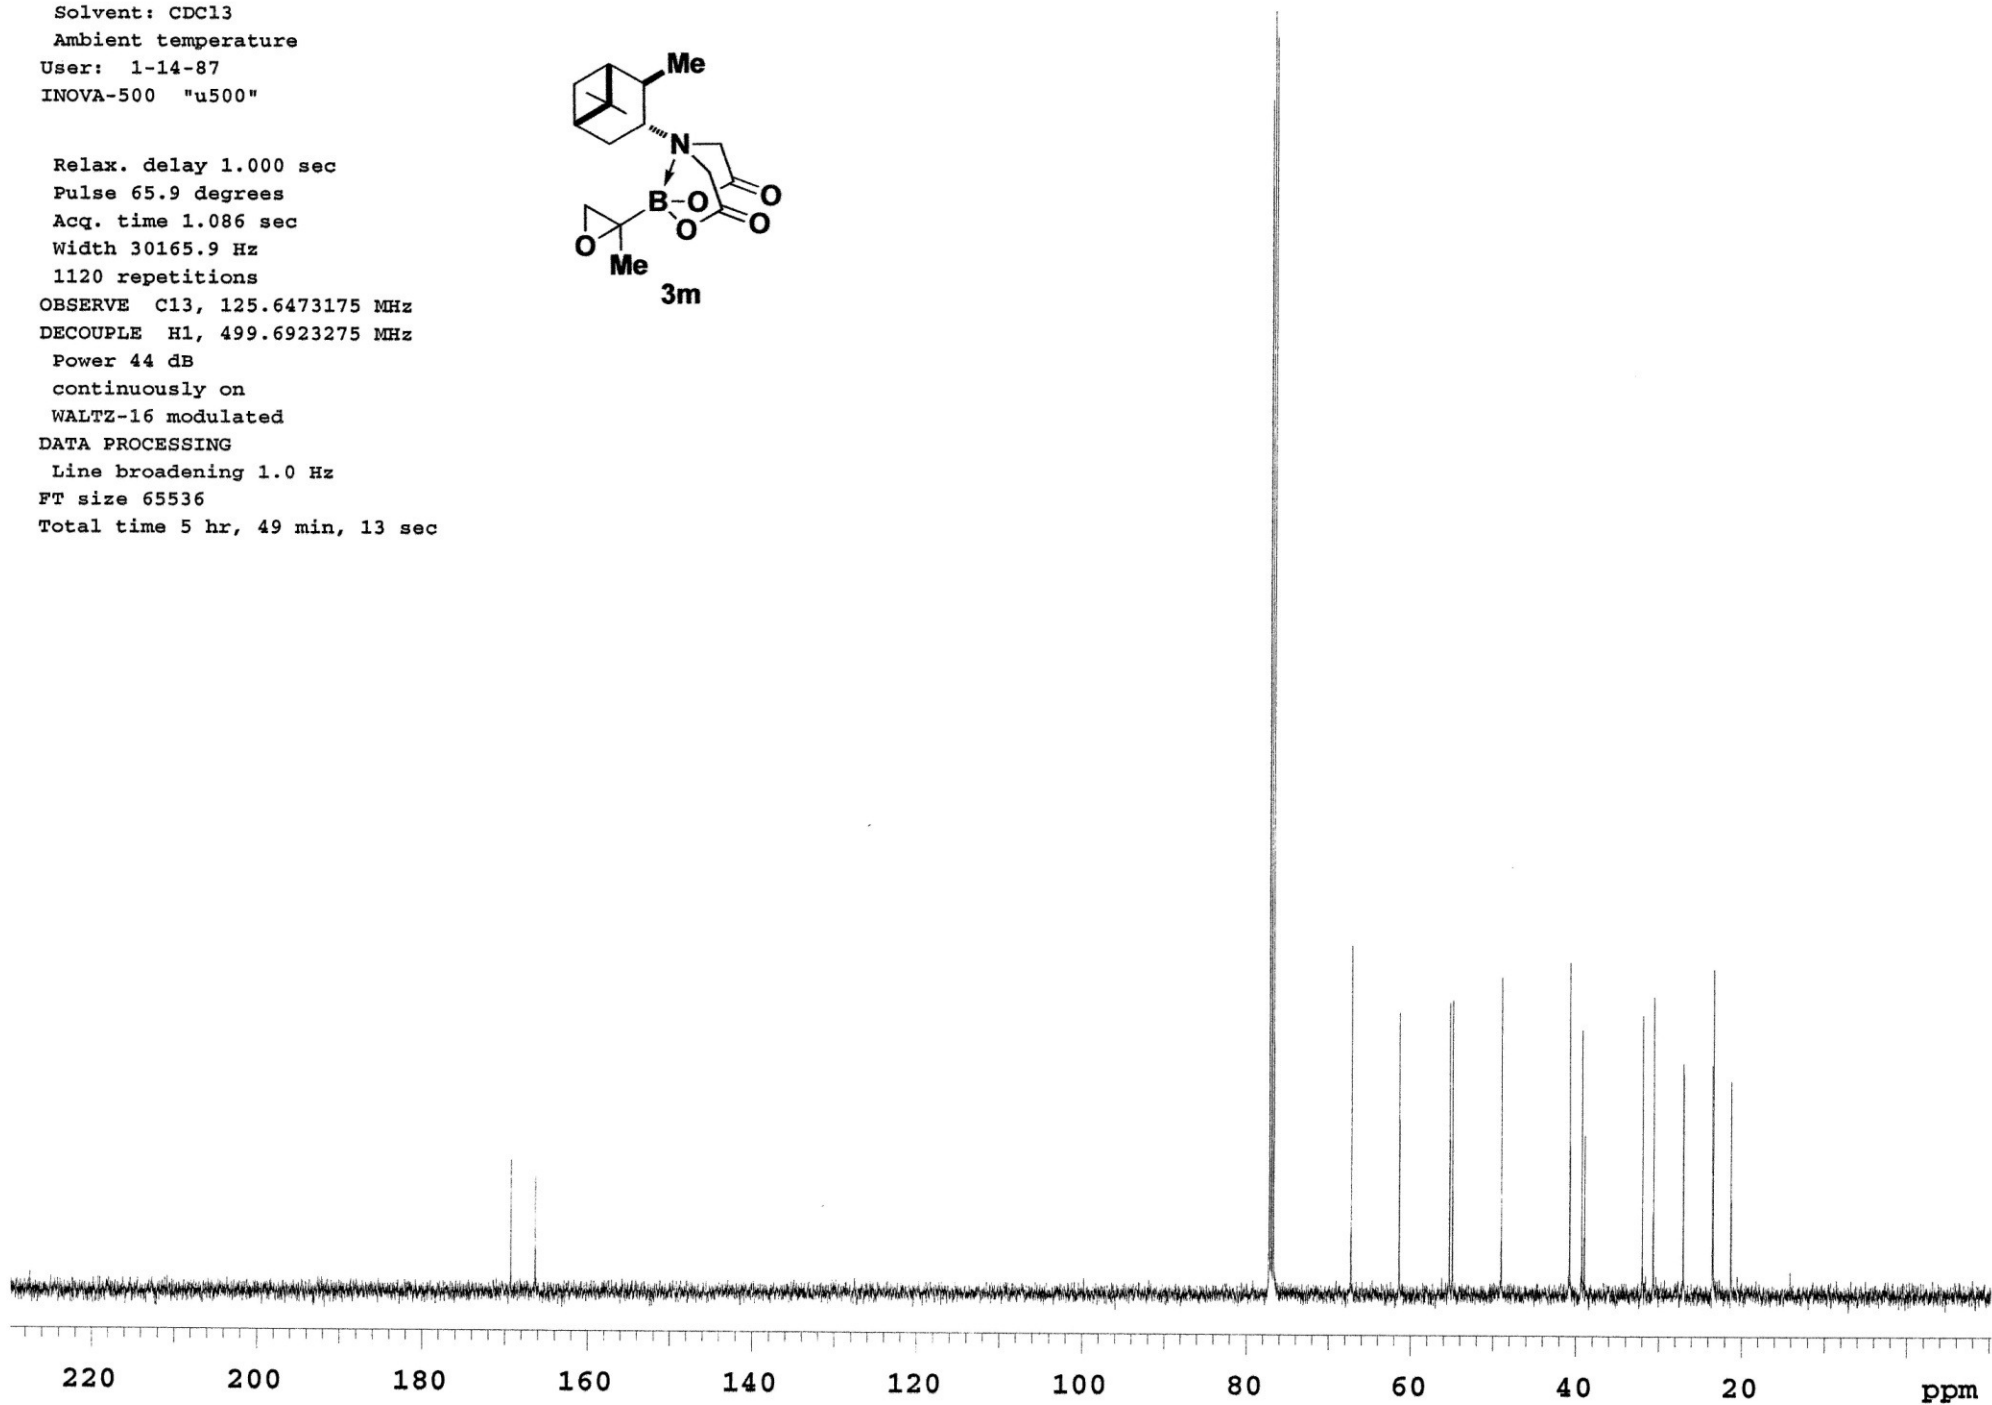

Pulse Sequence: s2pul

Solvent: CDCl<sub>3</sub>  
Temp. 20.0 C / 293.1 K  
INOVA-500 "vnr500"

Relax. delay 10.000 sec  
Pulse 45.0 degrees  
Acq. time 4.096 sec  
Width 8000.0 Hz  
32 repetitions  
OBSERVE H1, 499.429892 MHz  
DATA PROCESSING  
Line broadening 0.3 Hz  
FT size 65536  
Total time 7 min, 31 sec

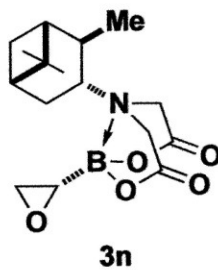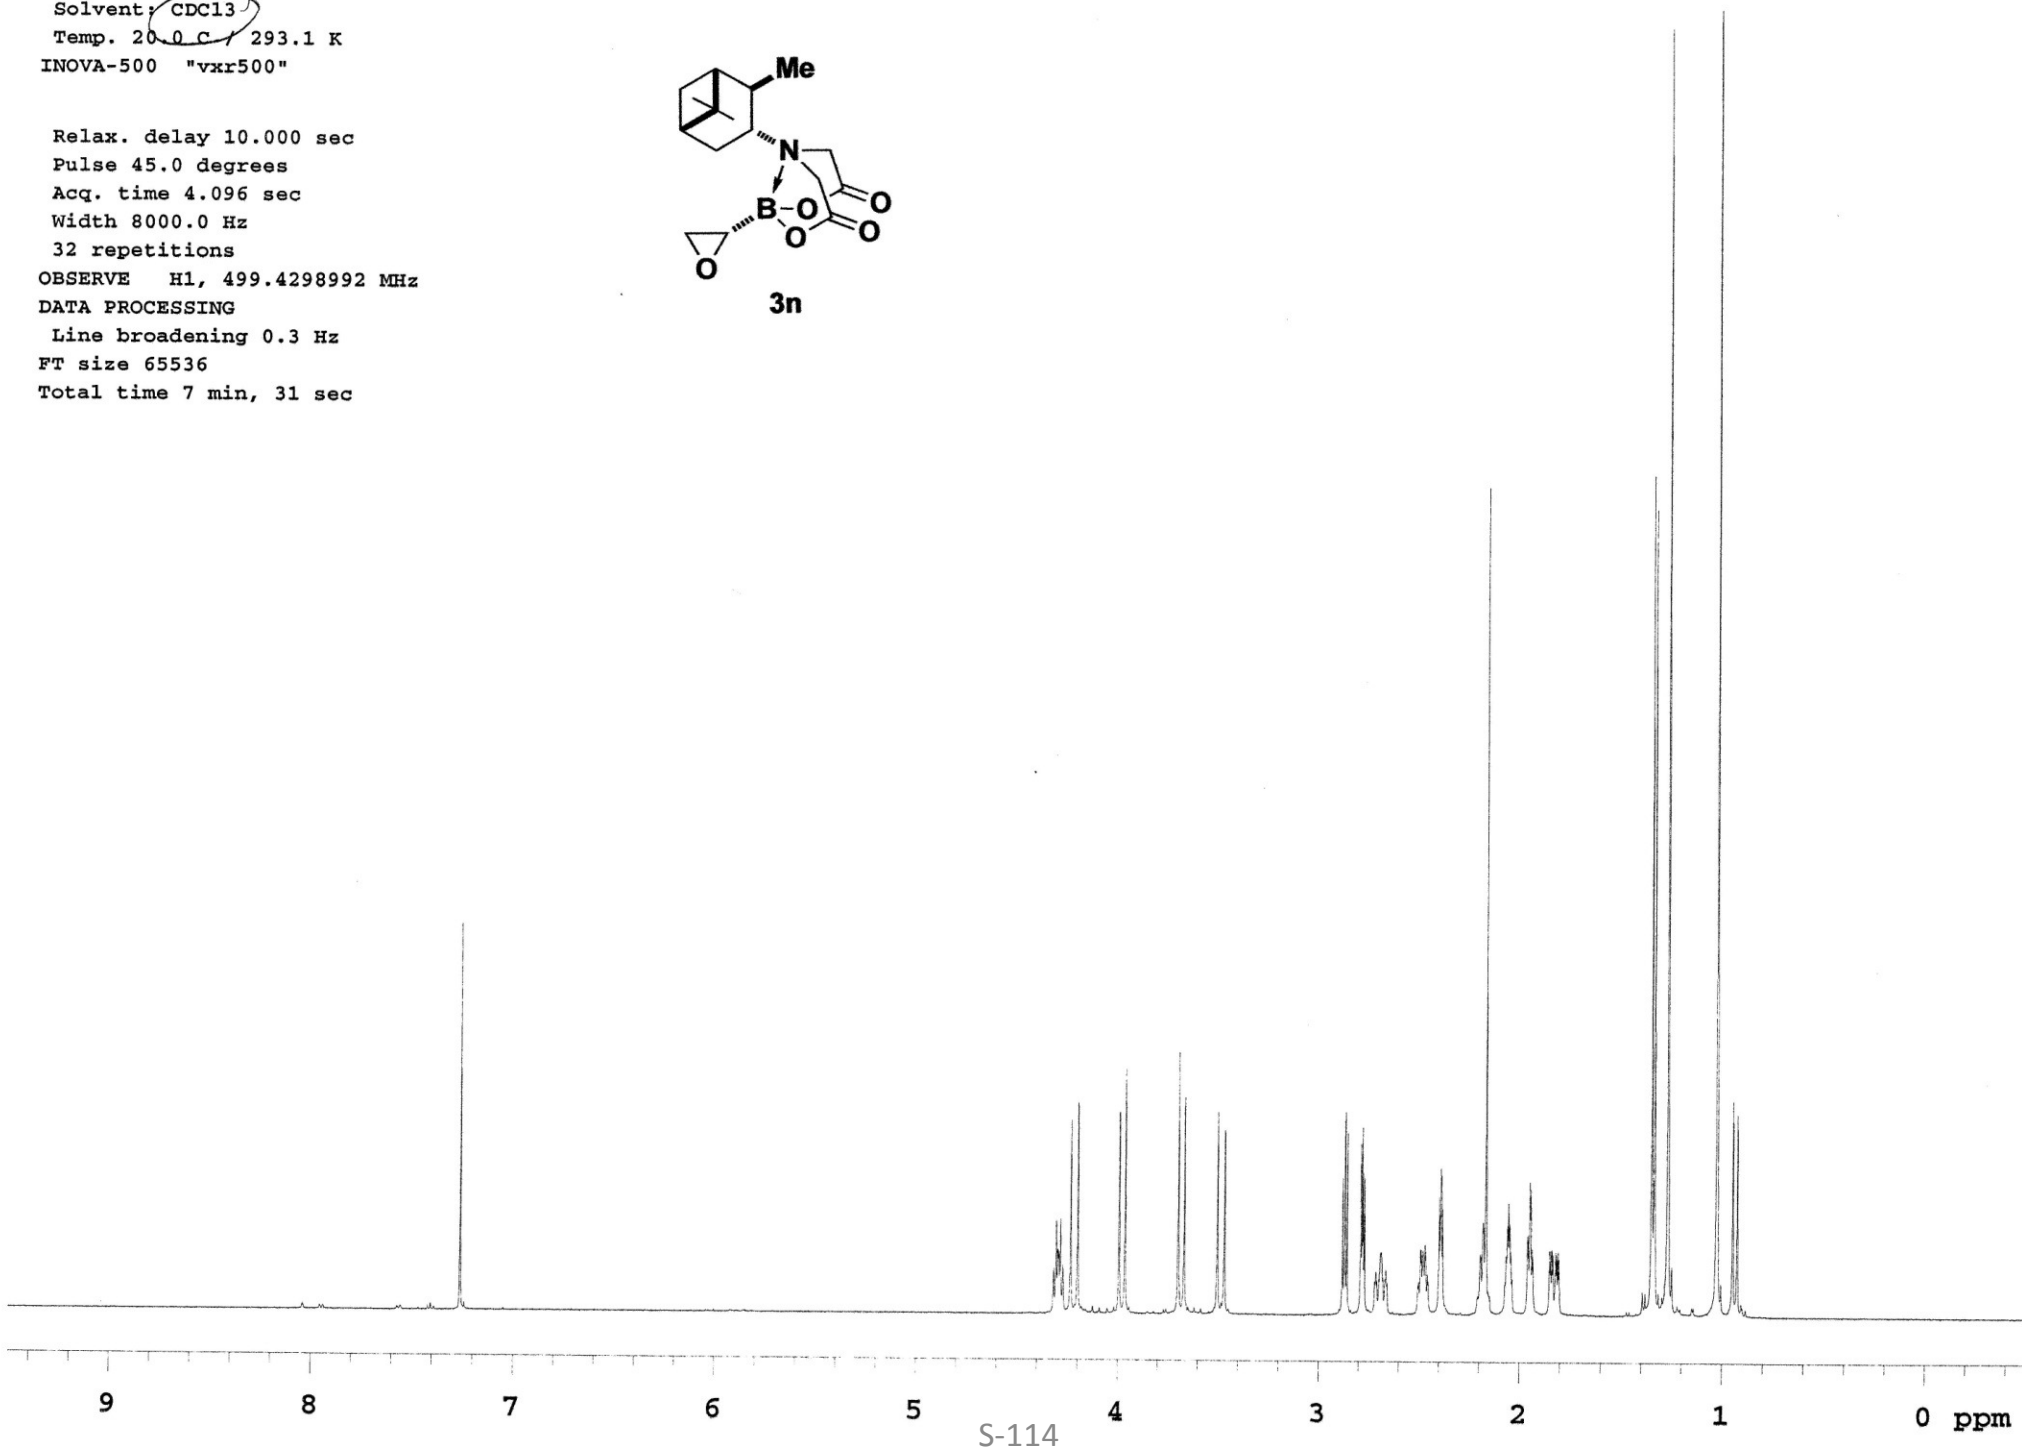

Pulse Sequence: s2pul

Solvent: CDCl<sub>3</sub>

Temp. 20.0 C / 293.1 K

User: 1-14-87

INOVA-500 "vkr500"

Relax. delay 1.000 sec

Pulse 45.0 degrees

Acq. time 1.024 sec

Width 32000.0 Hz

416 repetitions

OBSERVE C13, 125.5817502 MHz

DECOUPLE H1, 499.4315638 MHz

Power 48 dB

continuously on

WALTZ-16 modulated

DATA PROCESSING

Line broadening 1.0 Hz

FT size 65536

Total time 5 hr, 38 min, 51 sec

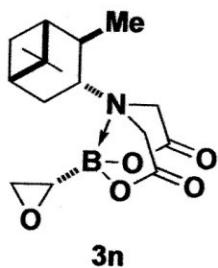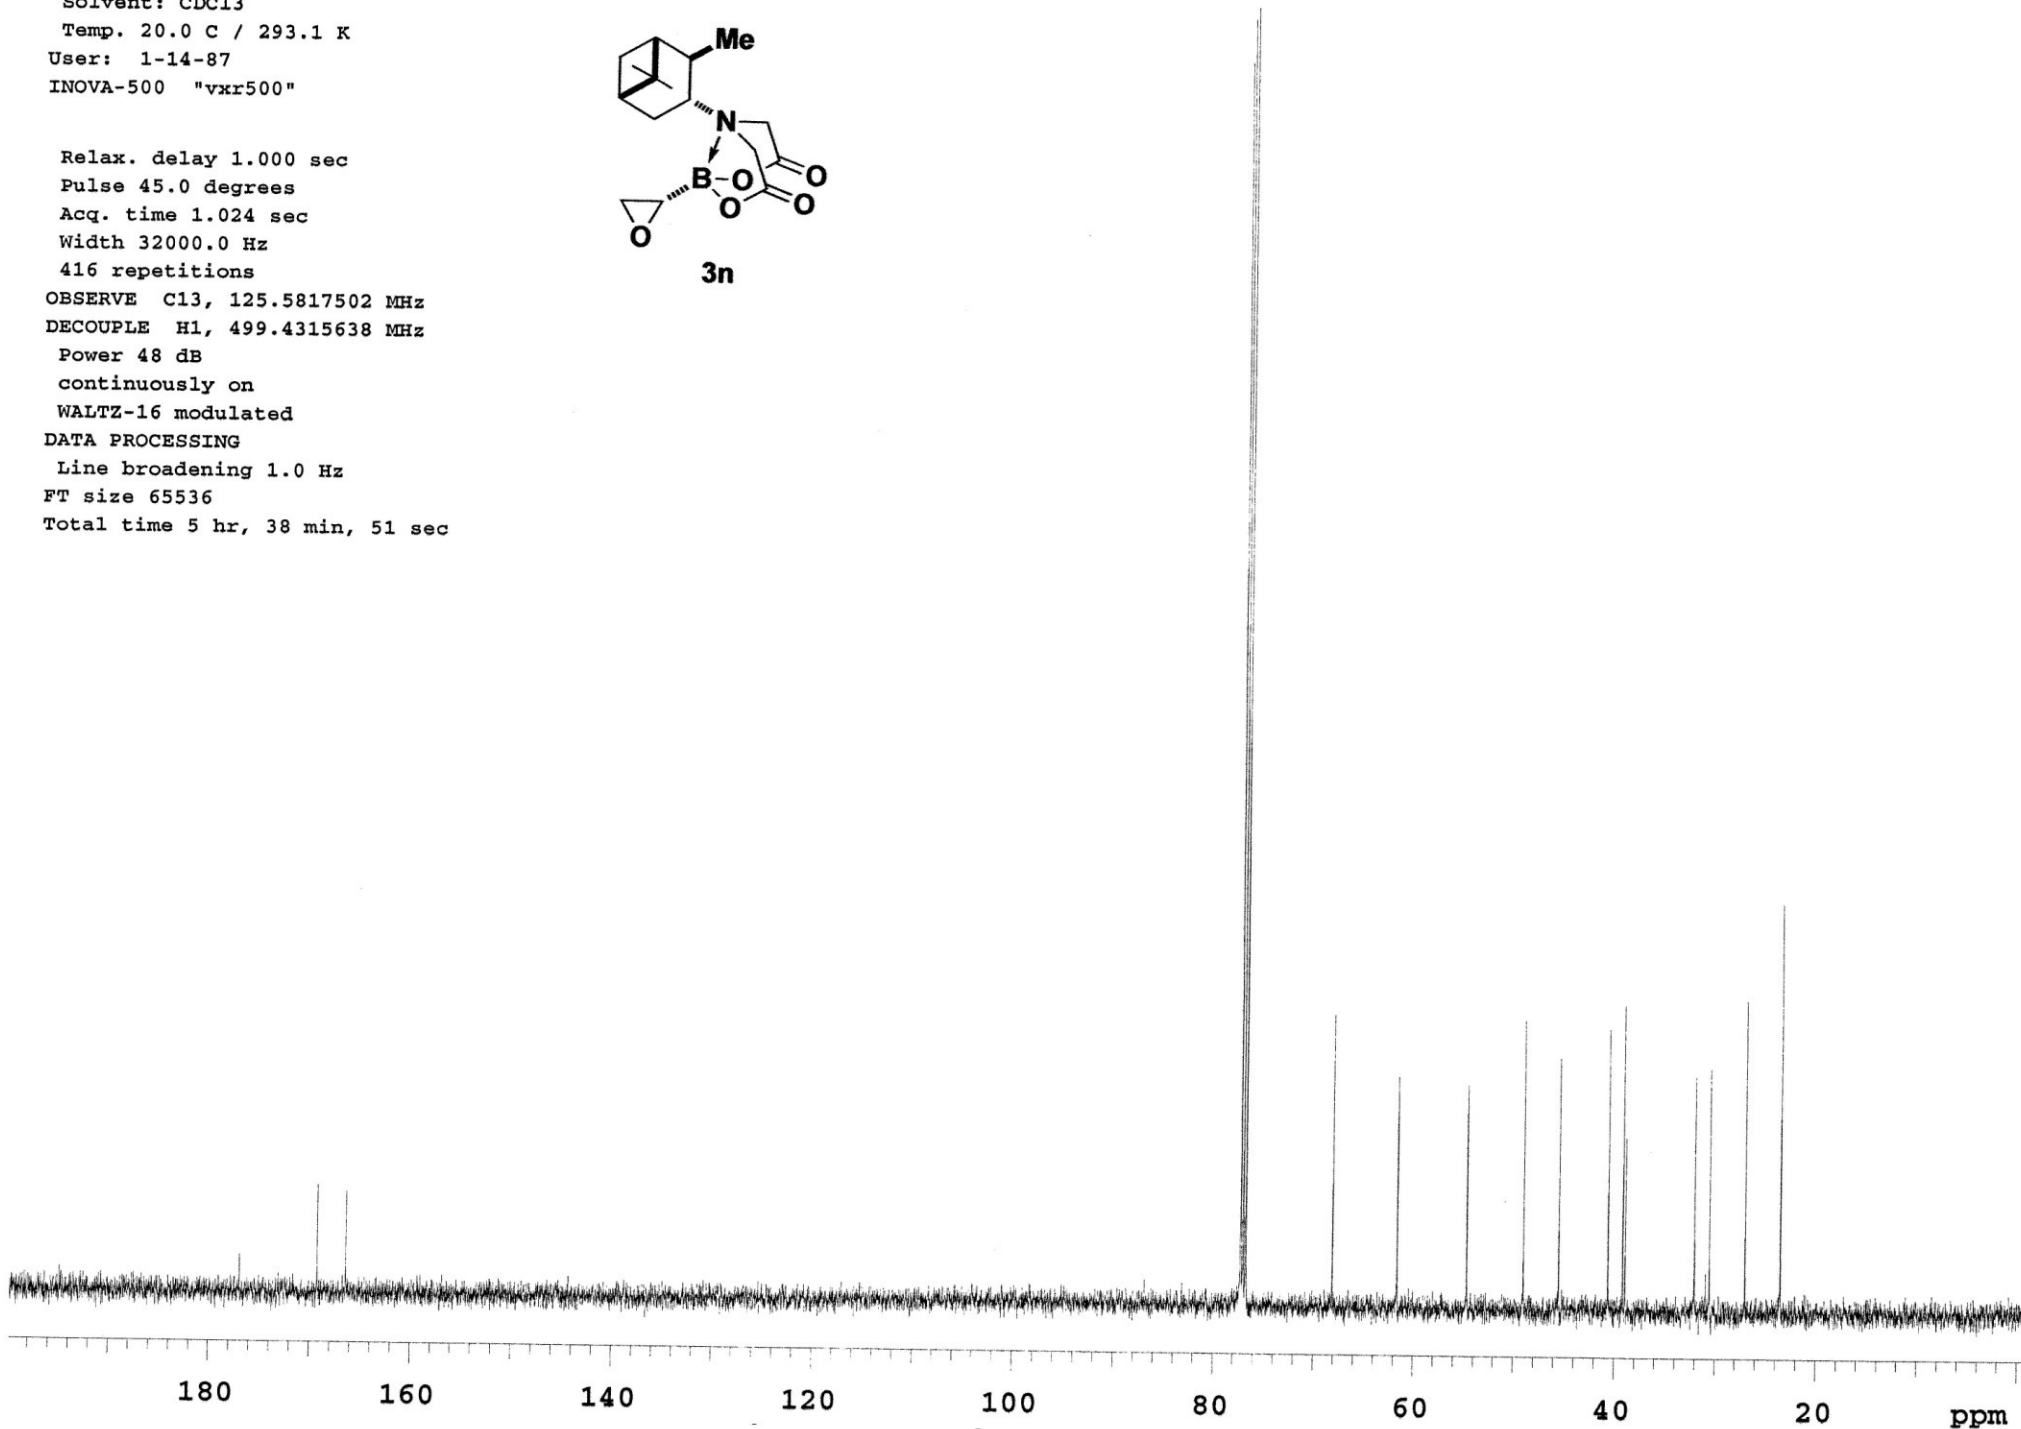

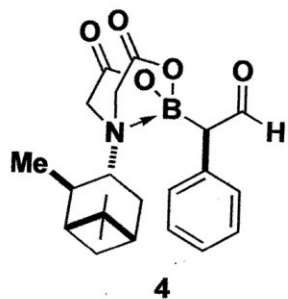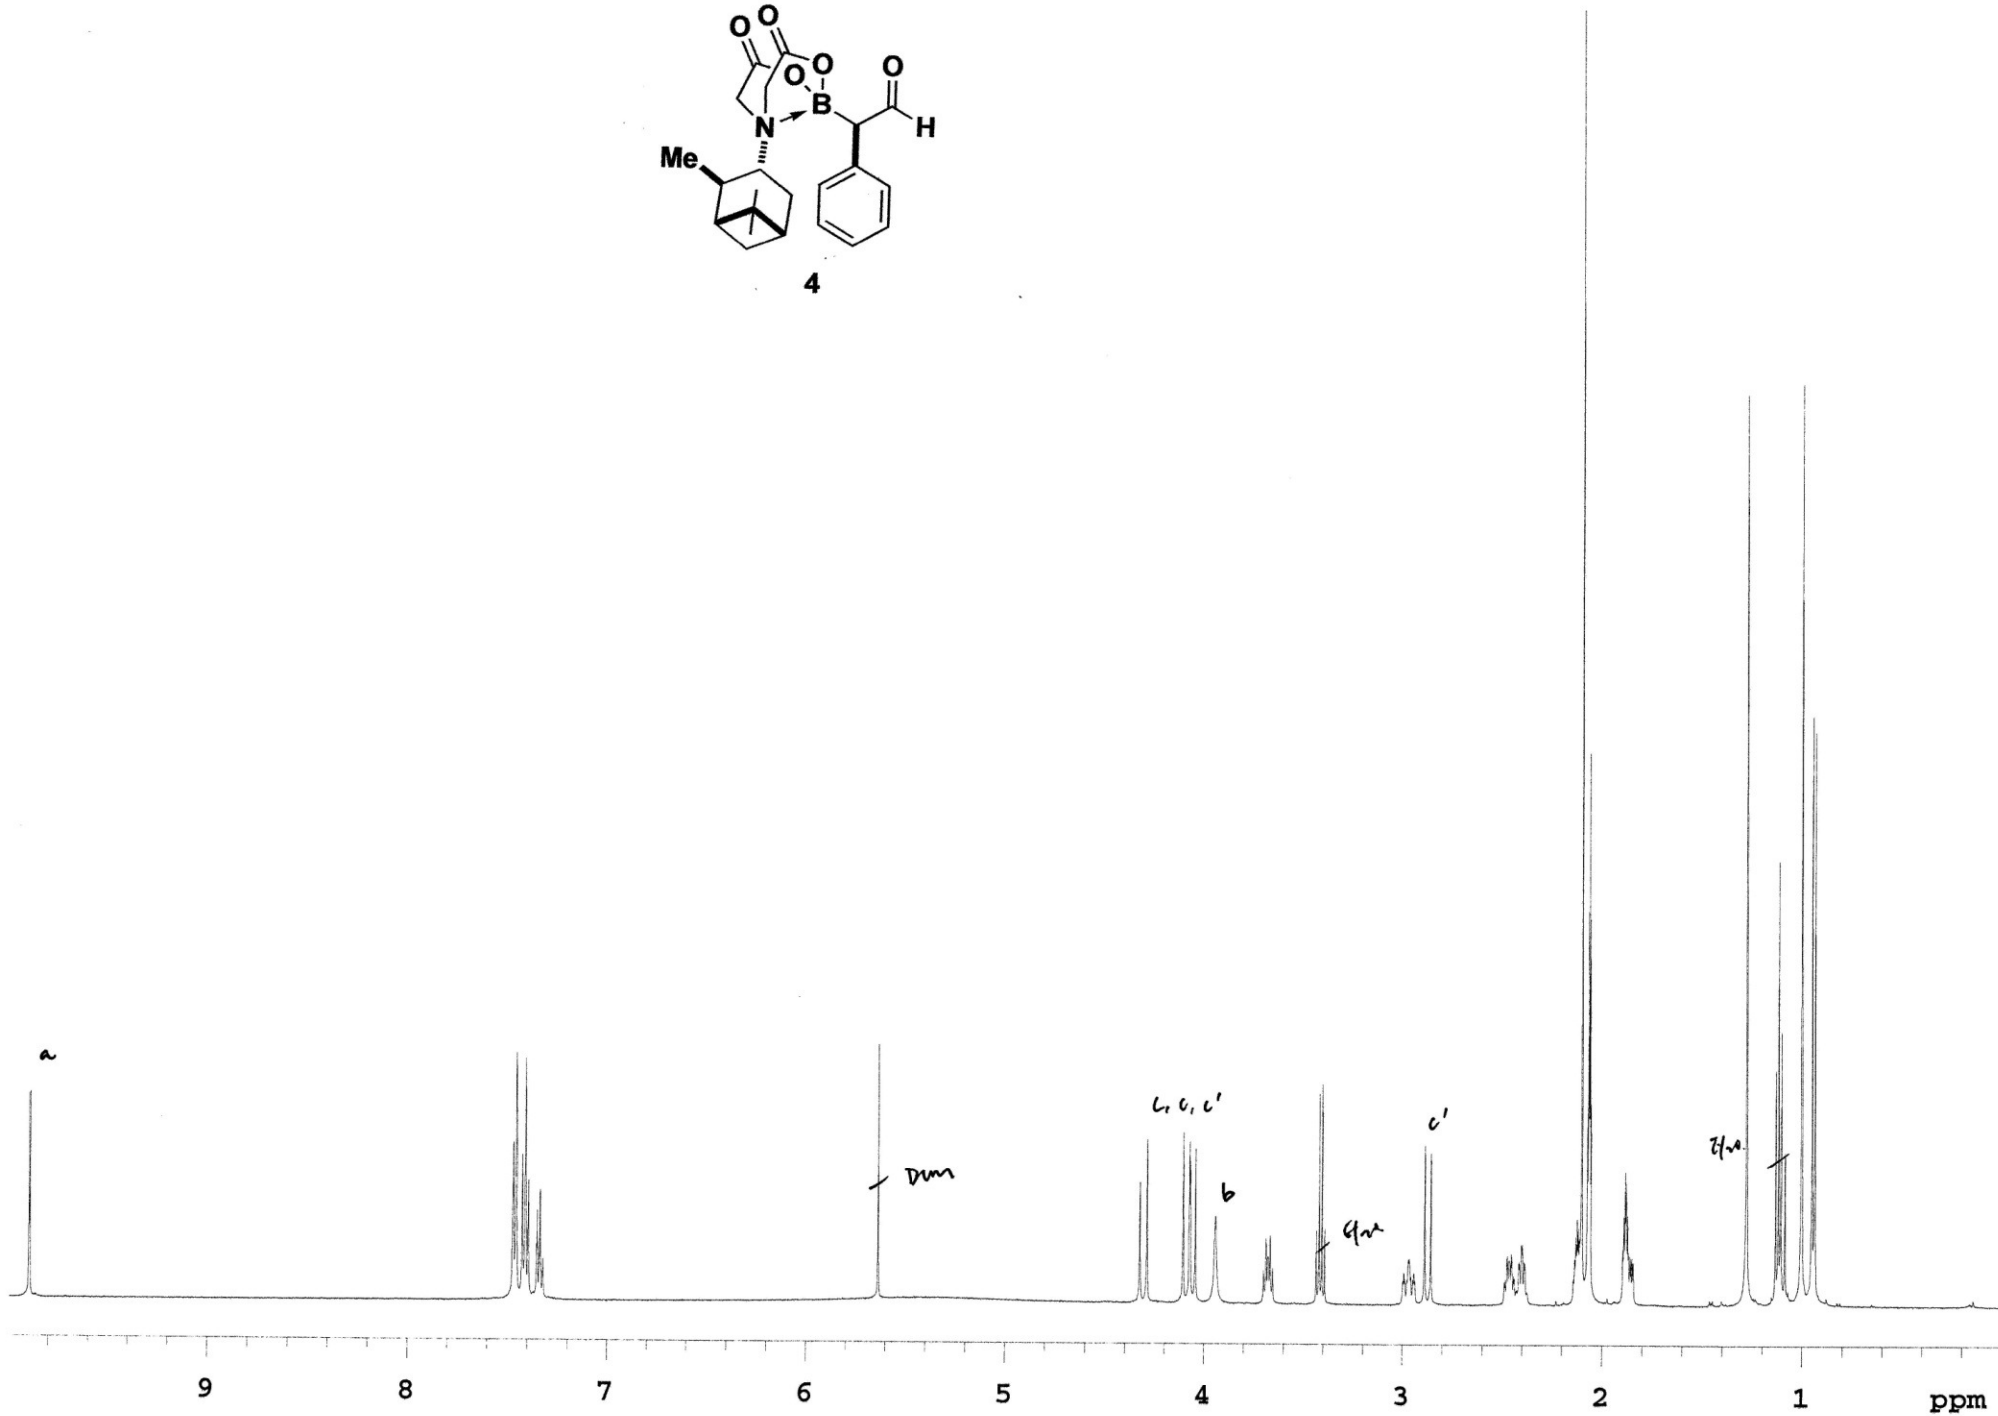

Pulse Sequence: s2pul  
exp1 s2pul

| SAMPLE              |                | DEC. & VT  |          |
|---------------------|----------------|------------|----------|
| date                | Nov 18 2010    | dfrq       | 499.432  |
| solvent             | CDC13          | dn         | H1       |
| file                | /export/home/~ | dpwr       | 49       |
| data/vxr500/Burke/~ |                | dof        | -827.0   |
| lijunqi/C13_111810~ |                | dm         | YYY      |
| _JL_171D_CDC13.fid  |                | dmm        | w        |
| ACQUISITION         |                | dmf        | 22222    |
| sfrq                | 125.596        | dseq       |          |
| tn                  | C13            | dres       | 1.0      |
| at                  | 1.024          | homo       | n        |
| np                  | 65536          | PROCESSING |          |
| sw                  | 32000.0        | lb         | 1.00     |
| fb                  | 18000          | wtfile     |          |
| bs                  | 16             | proc       | ft       |
| ss                  | 1              | fn         | not used |
| tpwr                | 63             | math       | f        |
| pw                  | 3.9            |            |          |
| d1                  | 1.000          | werr       |          |
| tof                 | 1880.0         | wexp       |          |
| nt                  | 10000          | wbs        |          |
| ct                  | 448            | wnt        |          |
| alock               | n              |            |          |
| gain                | not used       |            |          |
| FLAGS               |                |            |          |
| il                  | n              |            |          |
| in                  | n              |            |          |
| dp                  | y              |            |          |
| hs                  | nn             |            |          |
| DISPLAY             |                |            |          |
| sp                  | -2223.8        |            |          |
| wp                  | 31999.0        |            |          |
| vs                  | 162            |            |          |
| sc                  | 0              |            |          |
| wc                  | 250            |            |          |
| hzmm                | 128.00         |            |          |
| is                  | 500.00         |            |          |
| rfl                 | 11894.5        |            |          |
| rfp                 | 9669.8         |            |          |
| th                  | 68             |            |          |
| ins                 | 100.000        |            |          |
| nm                  | ph             |            |          |

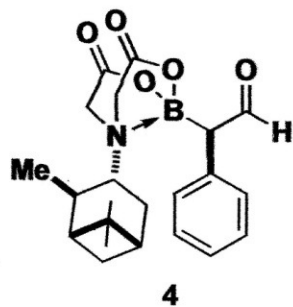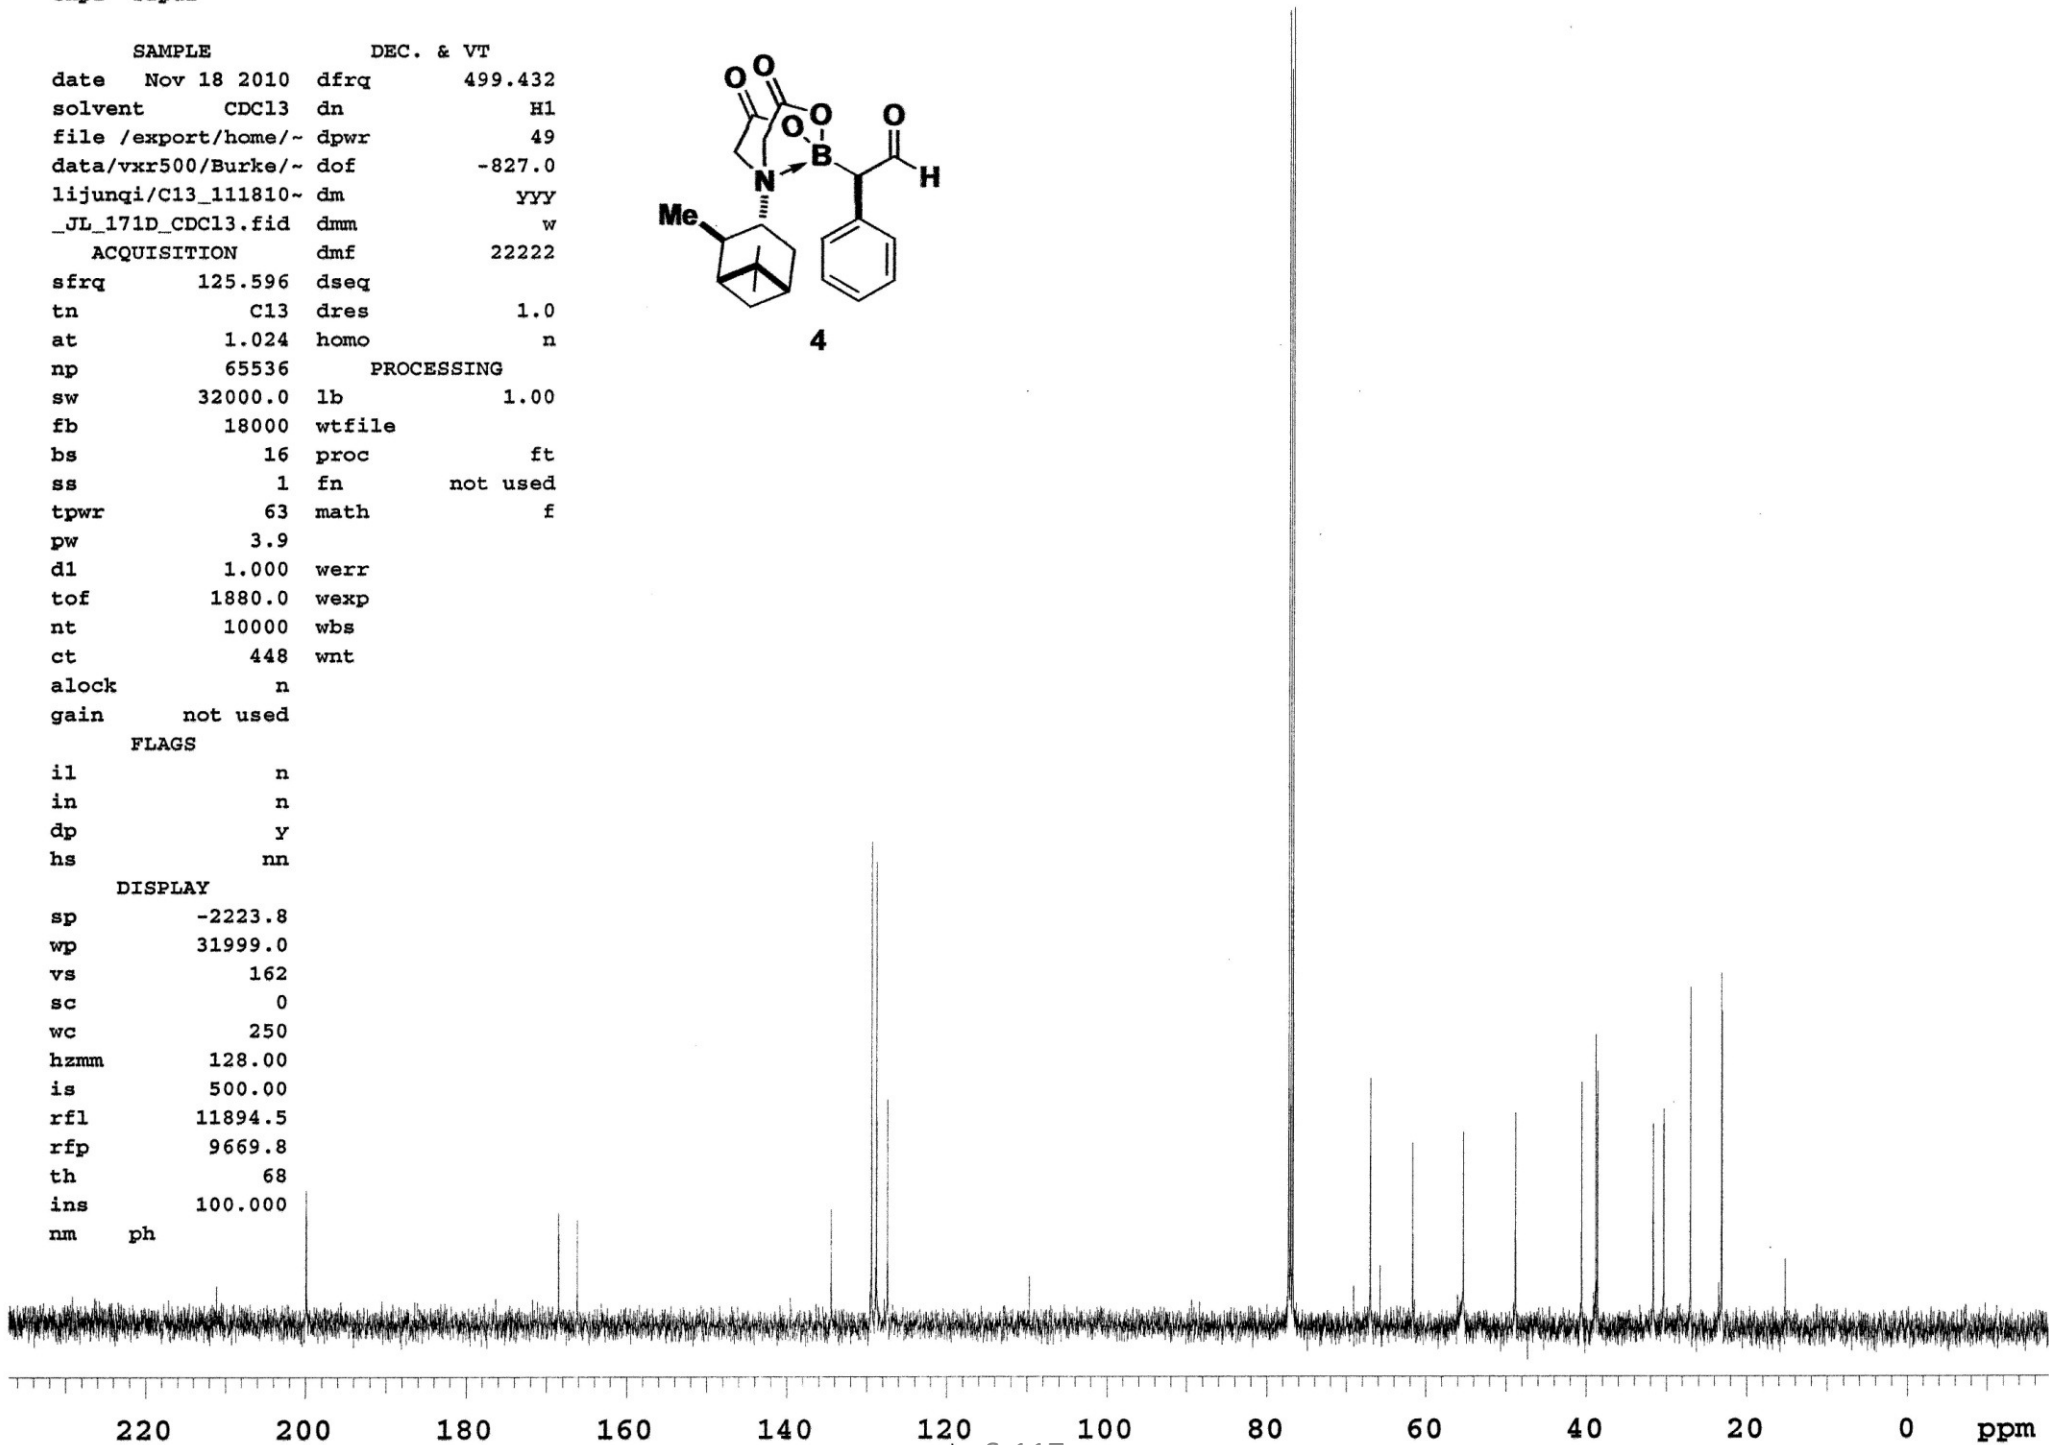

Pulse Sequence: s2pul

Solvent: CDCl3

Ambient temperature

INOVA-500 "vkr500"

Relax. delay 10.000 sec

Pulse 45.0 degrees

Acq. time 4.096 sec

Width 8000.0 Hz

32 repetitions

OBSERVE H1, 499.4298984 MHz

DATA PROCESSING

Line broadening 0.3 Hz

FT size 65536

Total time 7 min, 31 sec

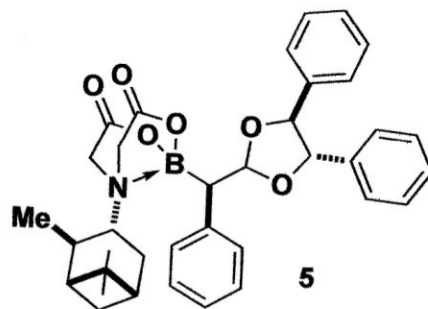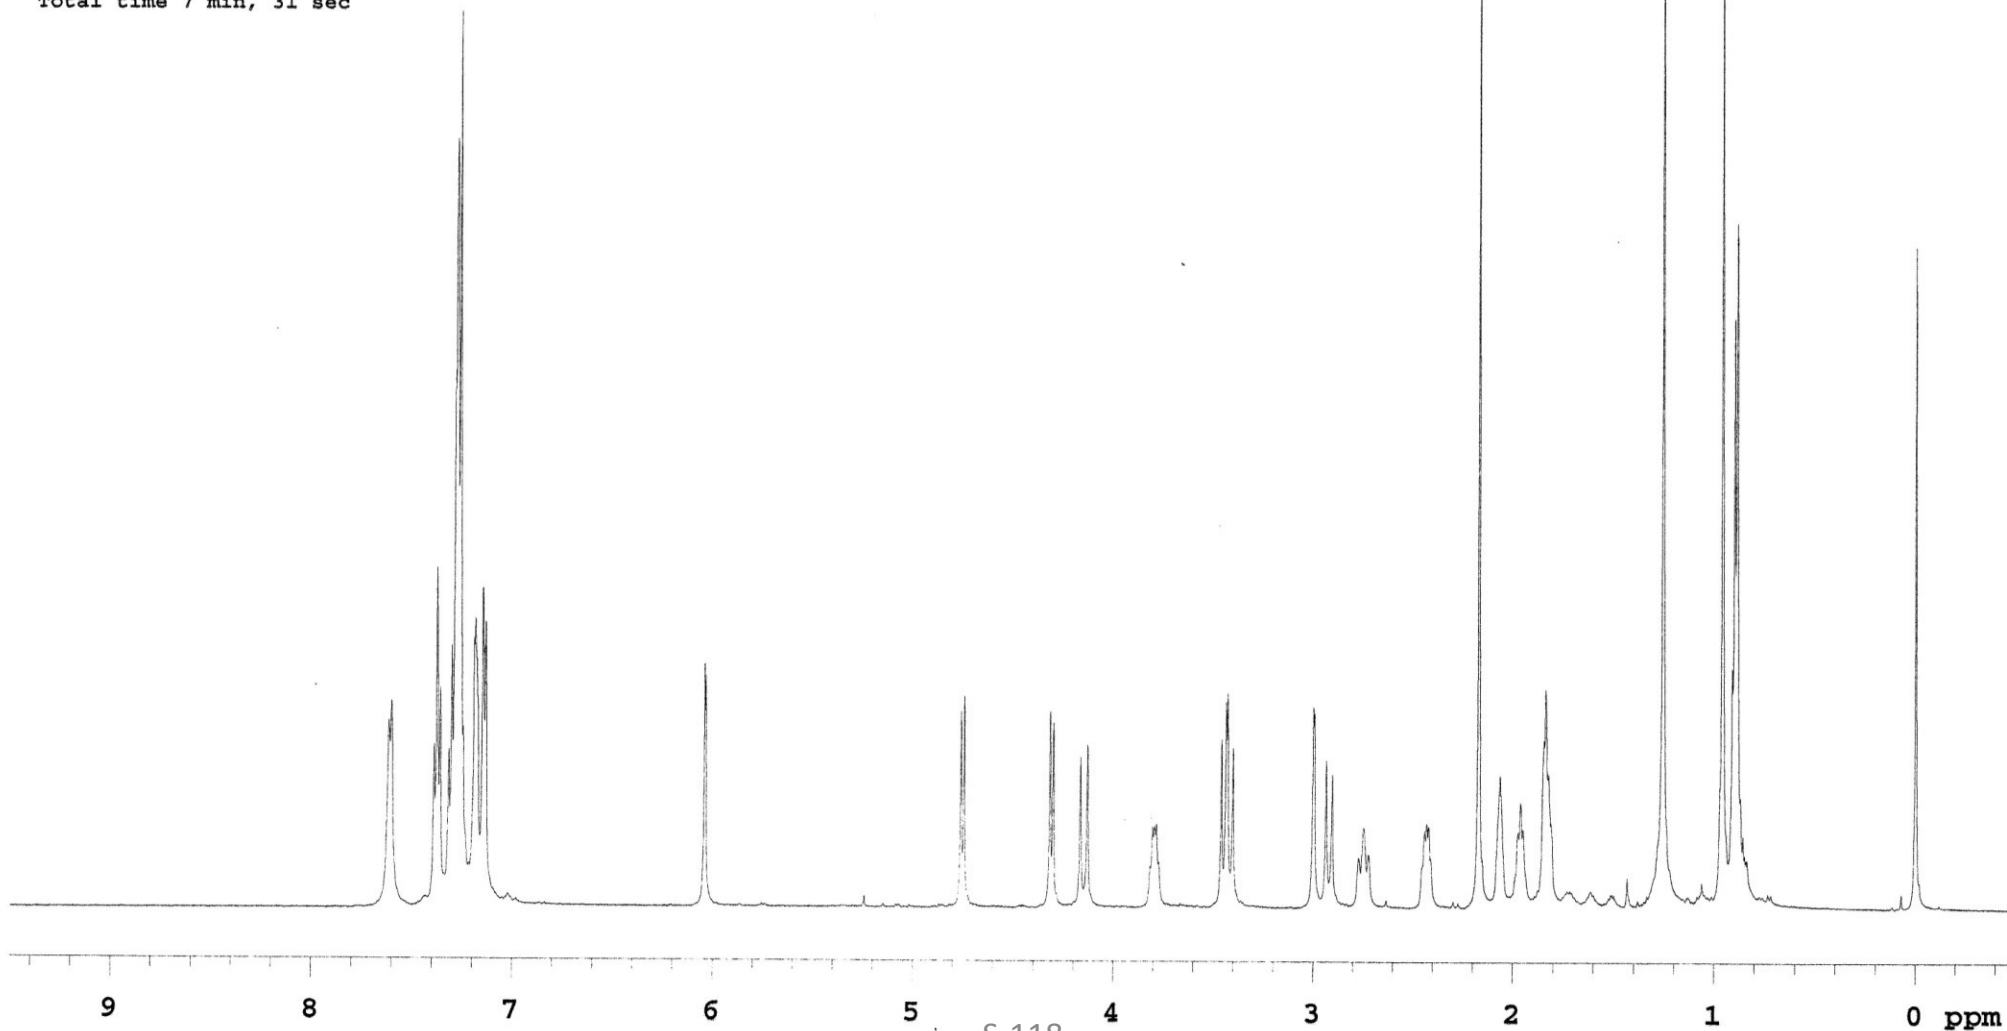

Pulse Sequence: s2pul

Solvent: CDC13

Ambient temperature

User: 1-14-87

INOVA-500 "vvr500"

Relax. delay 1.000 sec

Pulse 45.0 degrees

Acq. time 1.024 sec

Width 32000.0 Hz

752 repetitions

OBSERVE C13, 125.5817502 MHz

DECOUPLE H1, 499.4315638 MHz

Power 48 dB

continuously on

WALTZ-16 modulated

DATA PROCESSING

Line broadening 1.0 Hz

FT size 65536

Total time 5 hr, 38 min, 51 sec

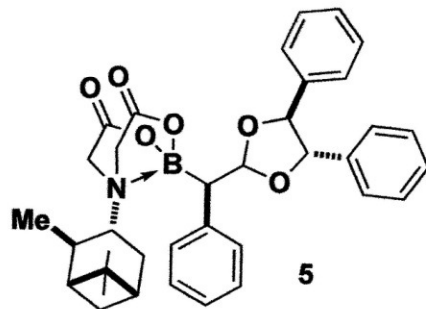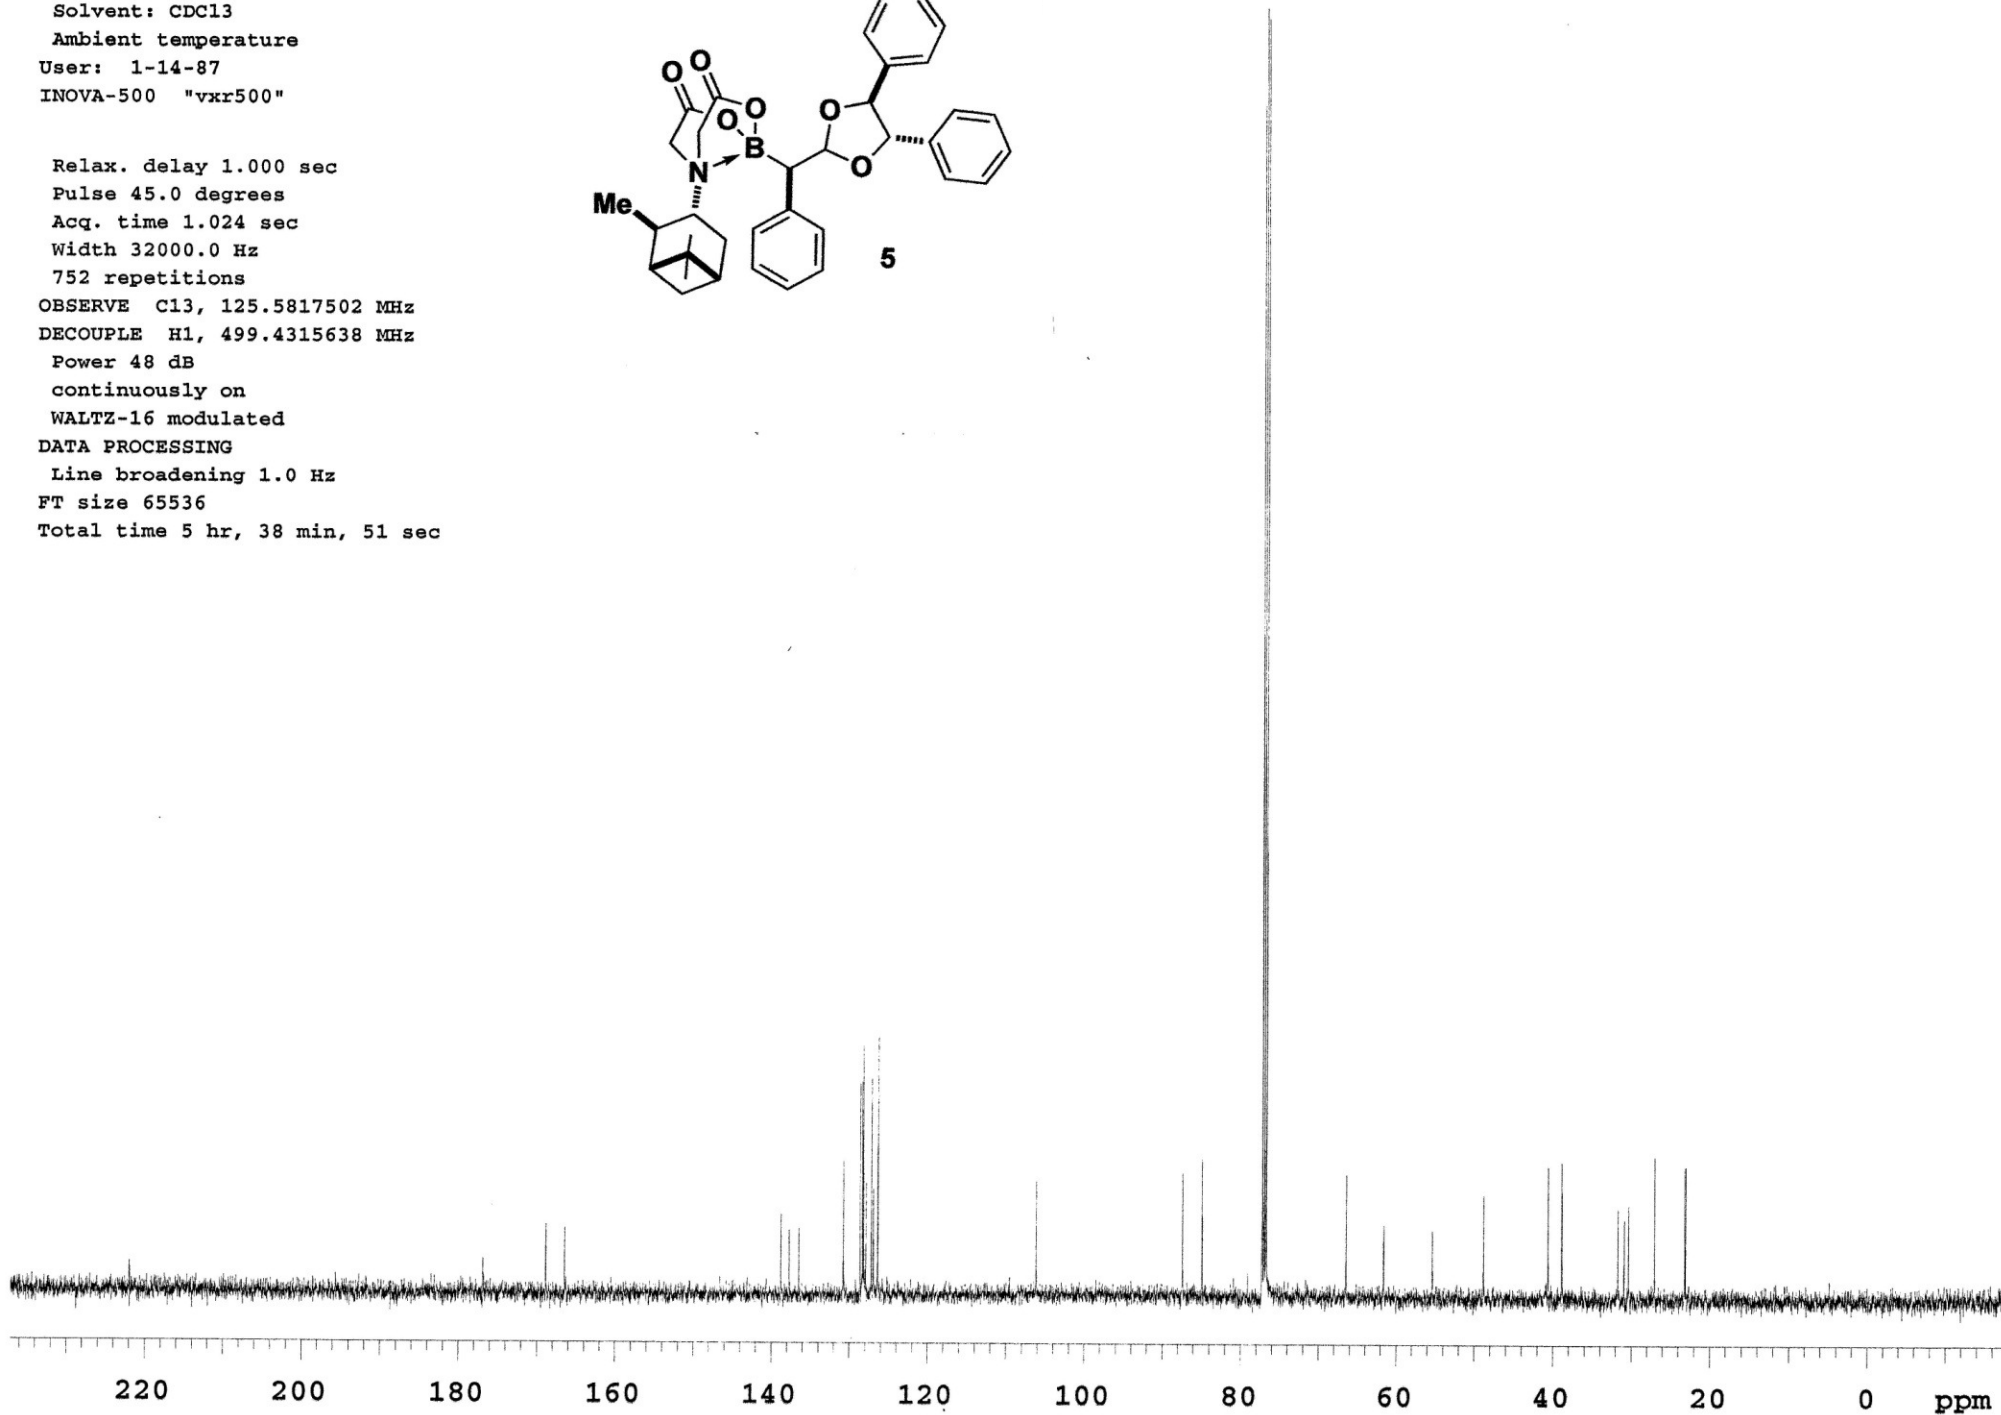

Pulse Sequence: s2pul

Solvent: CDCl3

Ambient temperature

INOVA-500 "vvr500"

Relax. delay 10.000 sec

Pulse 45.0 degrees

Acq. time 4.096 sec

Width 8000.0 Hz

8 repetitions

OBSERVE H1, 499.4298971 MHz

DATA PROCESSING

Line broadening 0.3 Hz

FT size 65536

Total time 1 min, 52 sec

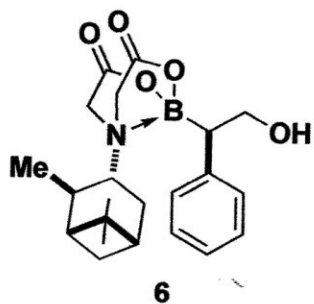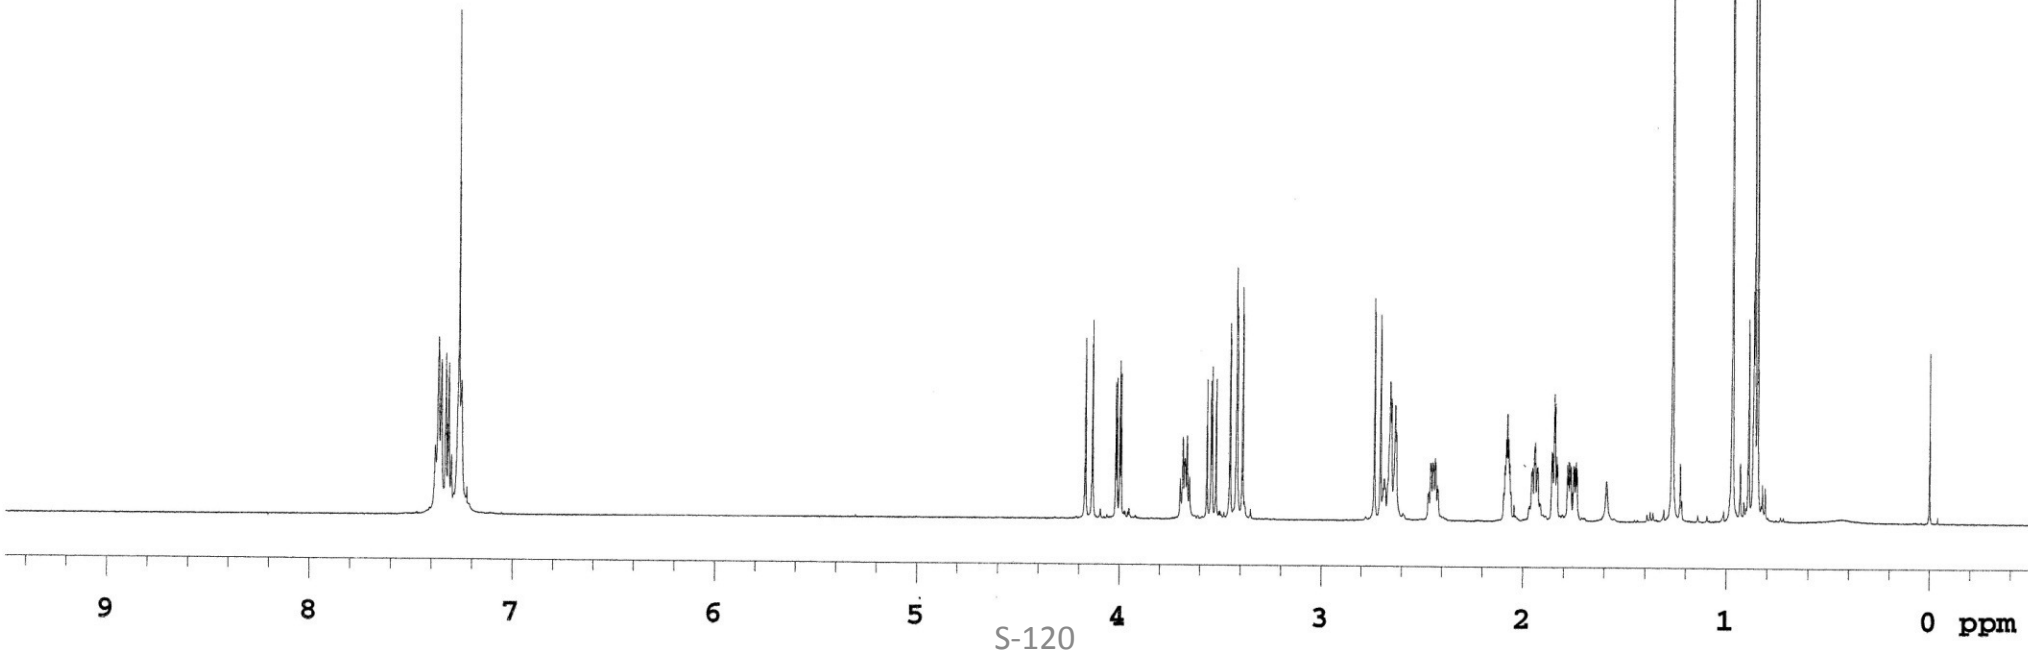



Pulse Sequence: s2pul

Solvent: CDC13

Ambient temperature

User: 1-14-87

INOVA-500 "vkr500"

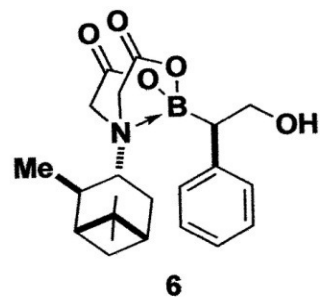

Relax. delay 1.000 sec

Pulse 45.0 degrees

Acq. time 1.024 sec

Width 32000.0 Hz

544 repetitions

OBSERVE C13, 125.5817166 MHz

DECOUPLE H1, 499.4315638 MHz

Power 48 dB

continuously on

WALTZ-16 modulated

DATA PROCESSING

Line broadening 1.0 Hz

FT size 65536

Total time 5 hr, 38 min, 51 sec

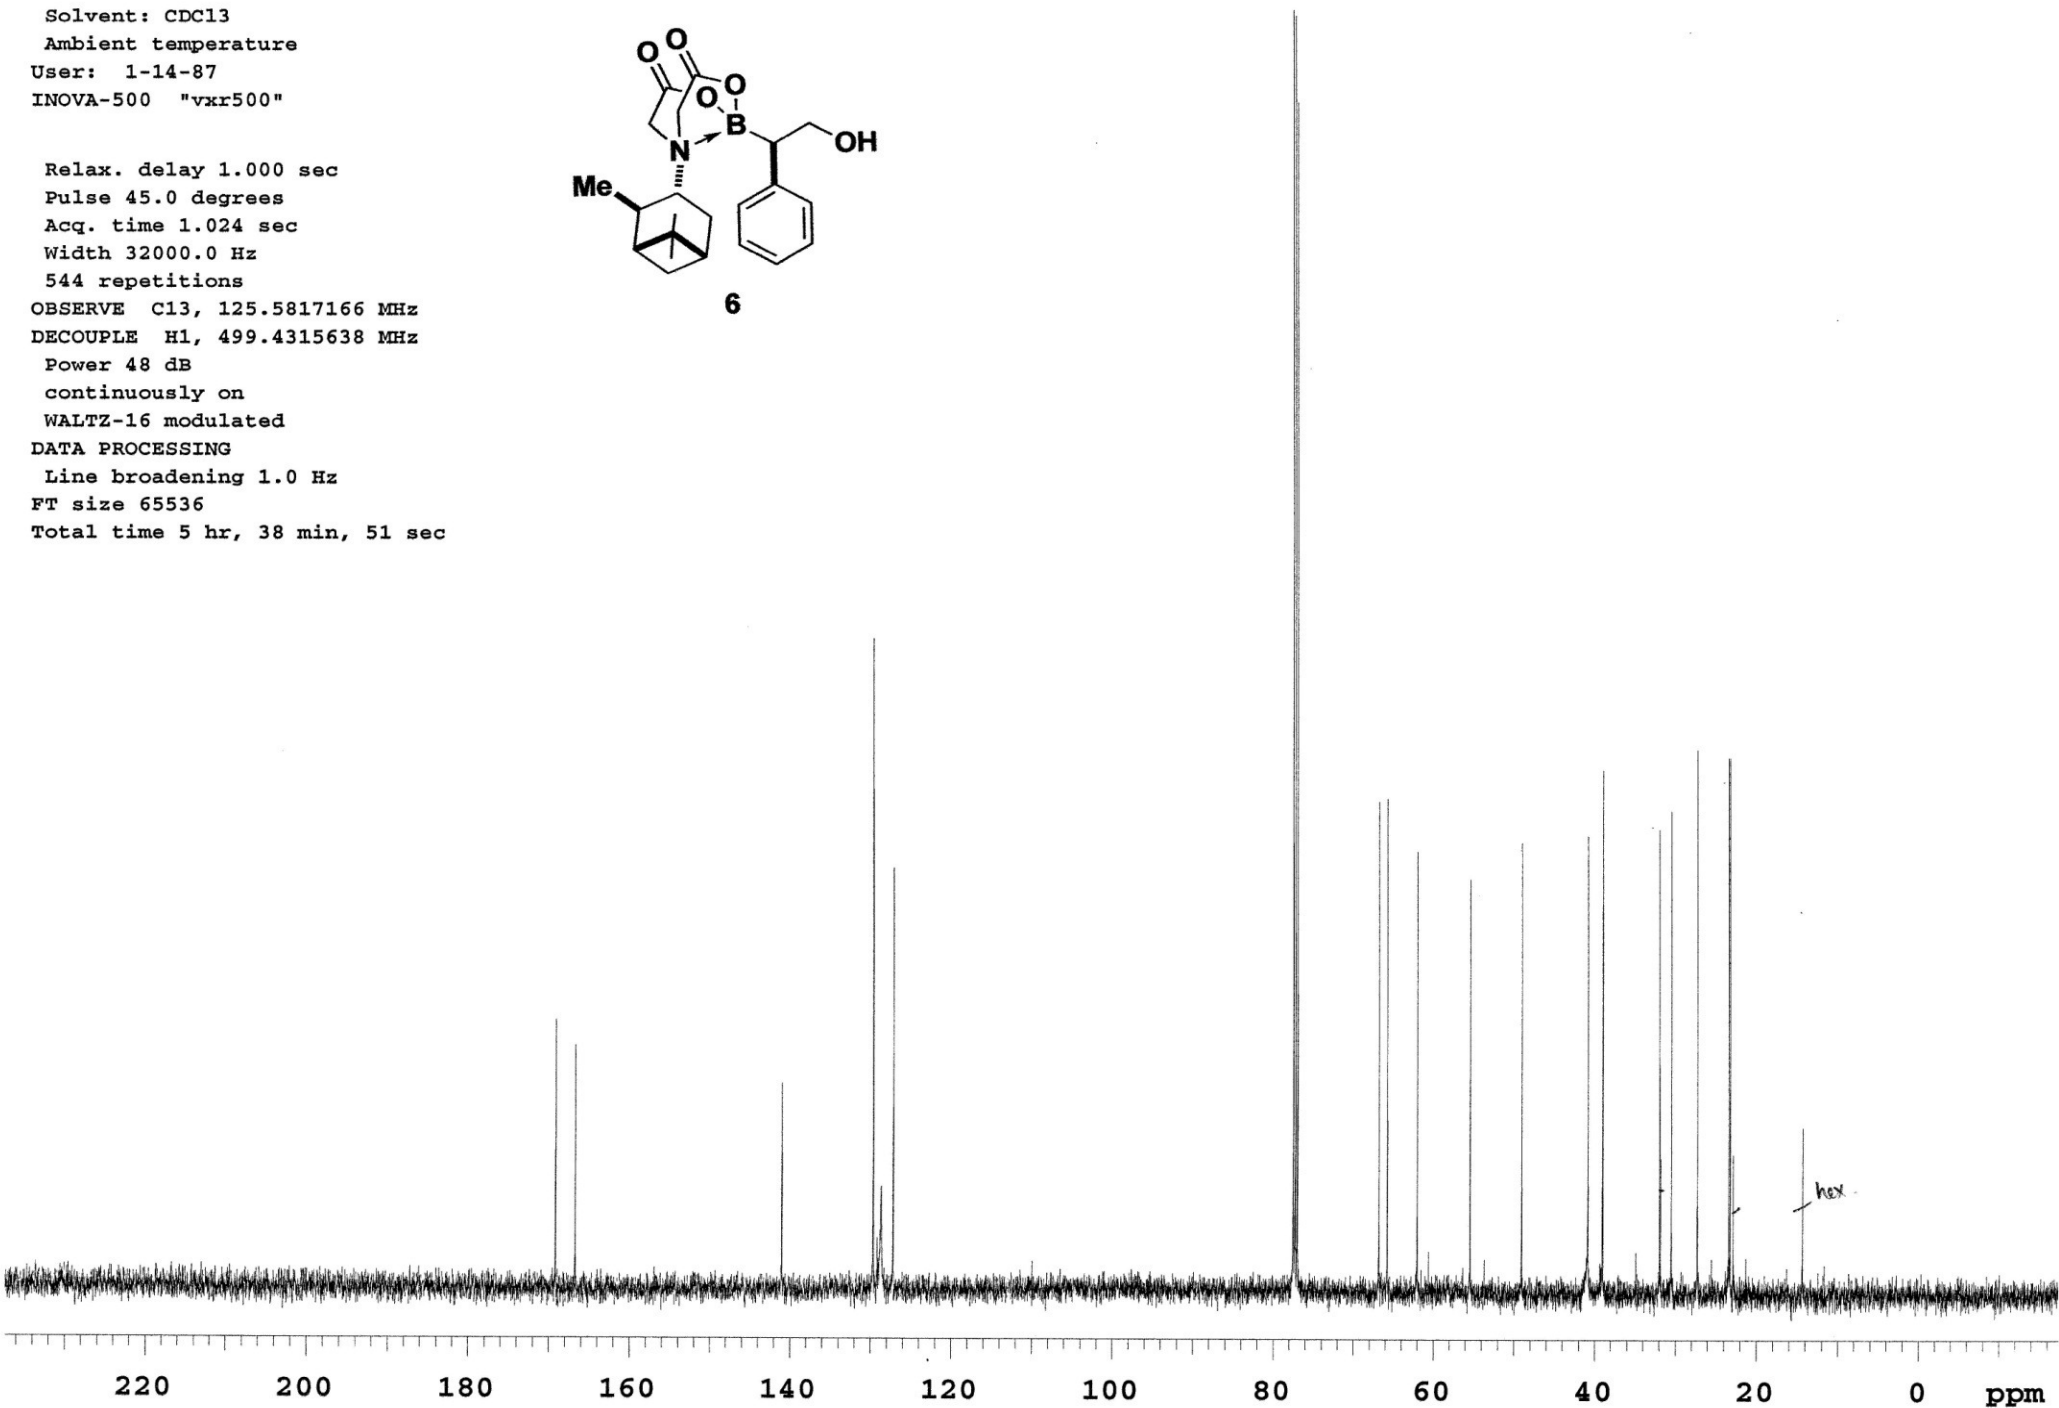

Pulse Sequence: s2pul

Solvent: CDCl3  
Ambient temperature  
INOVA-500 "vnr500"

Pulse 45.0 degrees  
Acq. time 4.096 sec  
Width 8000.0 Hz  
16 repetitions  
OBSERVE H1, 499.4298986 MHz  
DATA PROCESSING  
Line broadening 0.3 Hz  
FT size 65536  
Total time 1 min, 5 sec

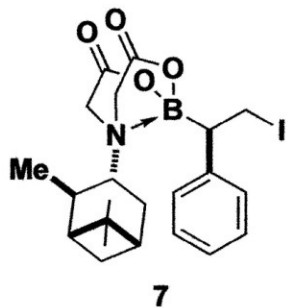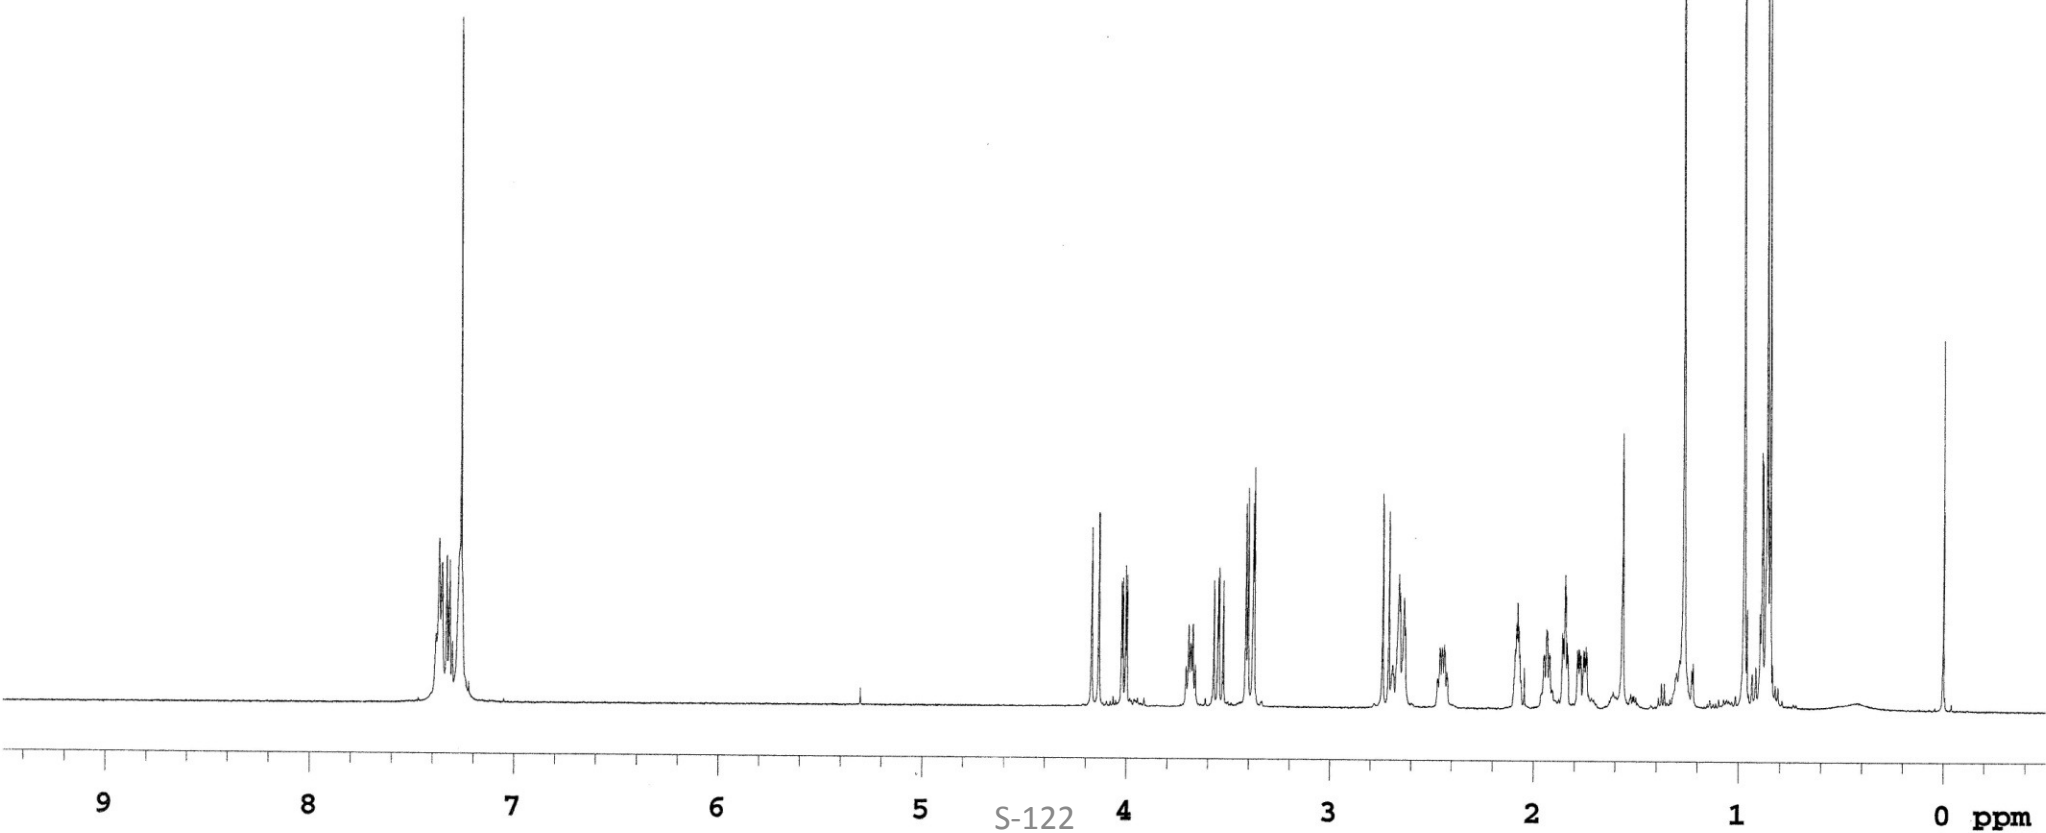

Pulse Sequence: s2pul

Solvent: CDCl3

Ambient temperature

User: 1-14-87

INNOVA-500 "vvr500"

Relax. delay 1.000 sec

Pulse 45.0 degrees

Acq. time 1.024 sec

Width 32000.0 Hz

656 repetitions

OBSERVE C13, 125.5817492 MHz

DECOUPLE H1, 499.4315638 MHz

Power 48 dB

continuously on

WALTZ-16 modulated

DATA PROCESSING

Line broadening 1.0 Hz

FT size 65536

Total time 5 hr, 38 min, 51 sec

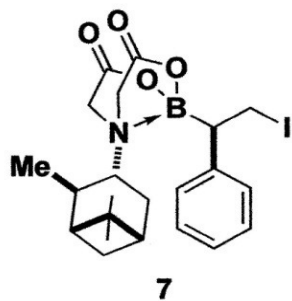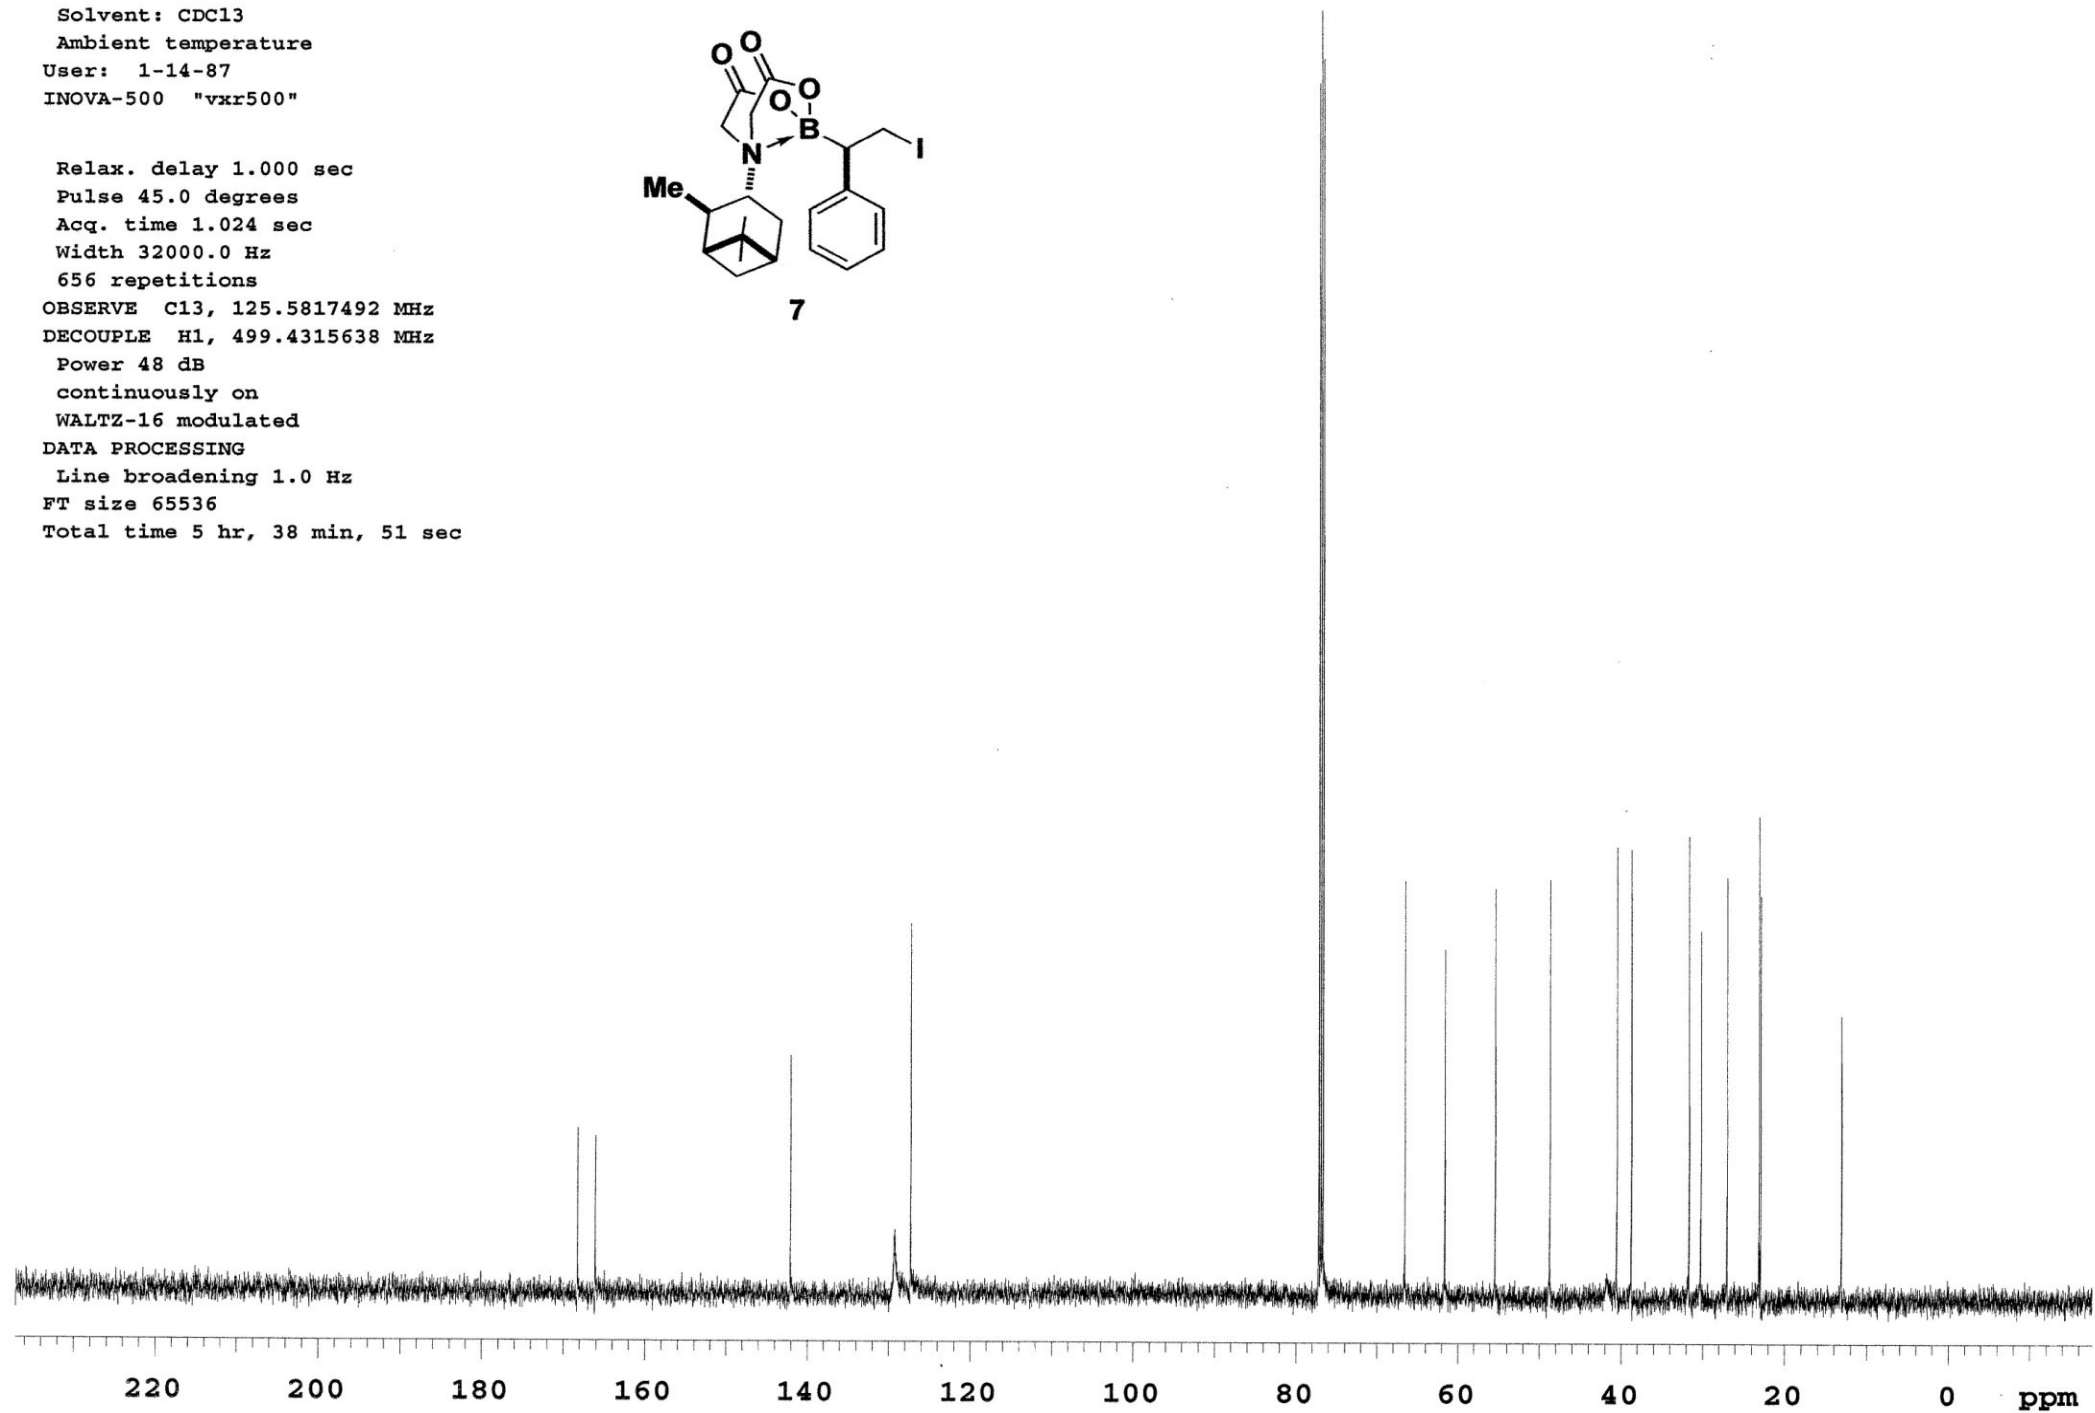

Pulse Sequence: s2pul

Solvent: CDCl3  
Ambient temperature  
INOVA-500 "vnr500"

Pulse 45.0 degrees  
Acq. time 4.096 sec  
Width 8000.0 Hz  
4 repetitions  
OBSERVE H1, 499.4298969 MHz  
DATA PROCESSING  
Line broadening 0.3 Hz  
FT size 65536  
Total time 0 min, 16 sec

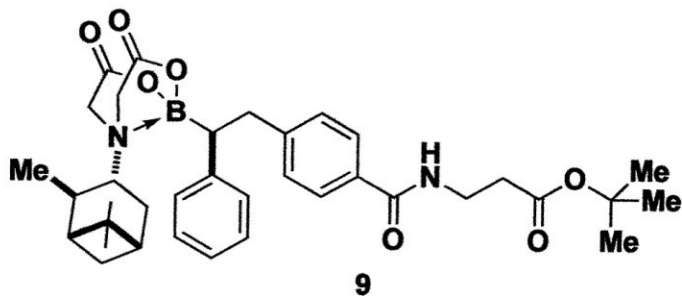

9

9

8

7

6

5

S-124

4

3

2

1

0 ppm

Pulse Sequence: s2pul

Solvent: CDCl3  
Ambient temperature  
User: 1-14-87  
INOVA-500 "vvr500"

Relax. delay 1.000 sec  
Pulse 45.0 degrees  
Acq. time 1.024 sec  
Width 32000.0 Hz  
608 repetitions  
OBSERVE C13, 125.5817166 MHz  
DECOUPLE H1, 499.4315638 MHz  
Power 48 dB  
continuously on  
WALTZ-16 modulated  
DATA PROCESSING  
Line broadening 1.0 Hz  
FT size 65536  
Total time 5 hr, 38 min, 51 sec

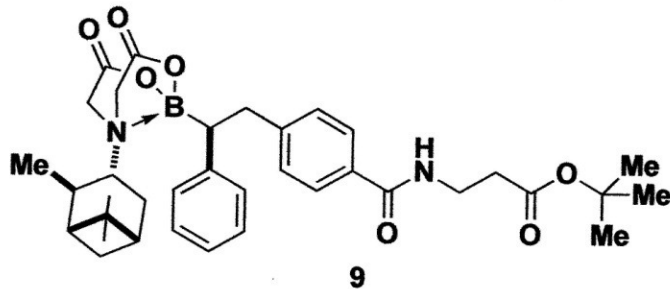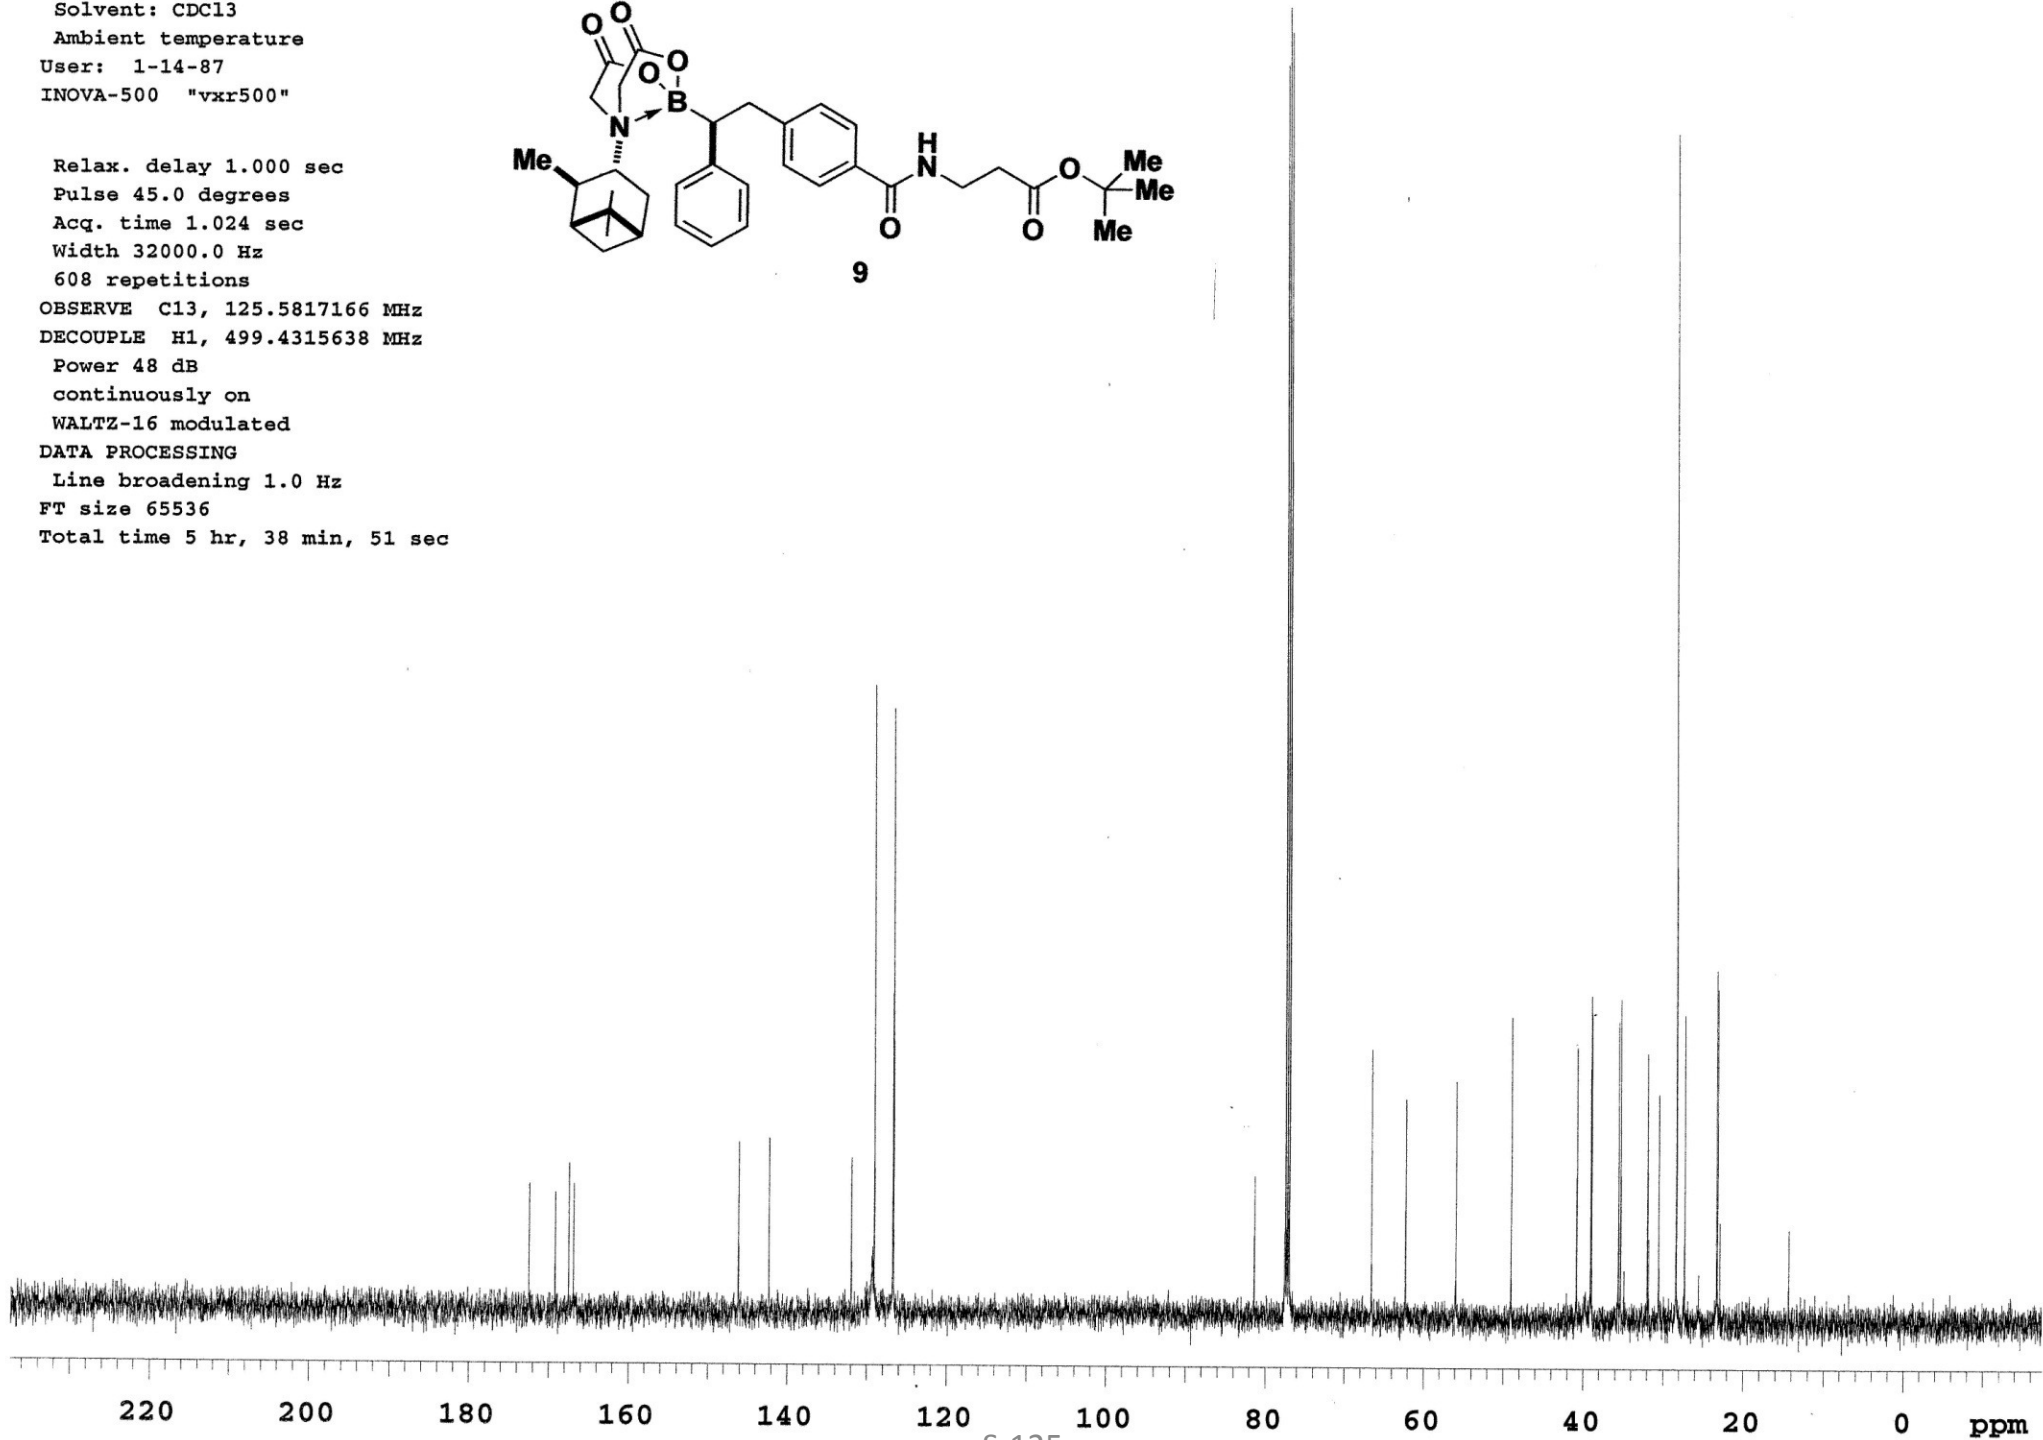

Pulse Sequence: s2pul

Solvent: CDCl3  
Ambient temperature  
INOVA-500 "u500"

Pulse 61.6 degrees  
Acq. time 4.665 sec  
Width 7024.9 Hz  
8 repetitions  
OBSERVE H1, 499.6906566 MHz  
DATA PROCESSING  
Line broadening 0.3 Hz  
FT size 65536  
Total time 0 min, 37 sec

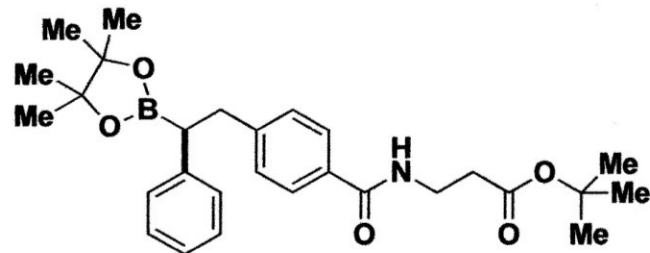

10

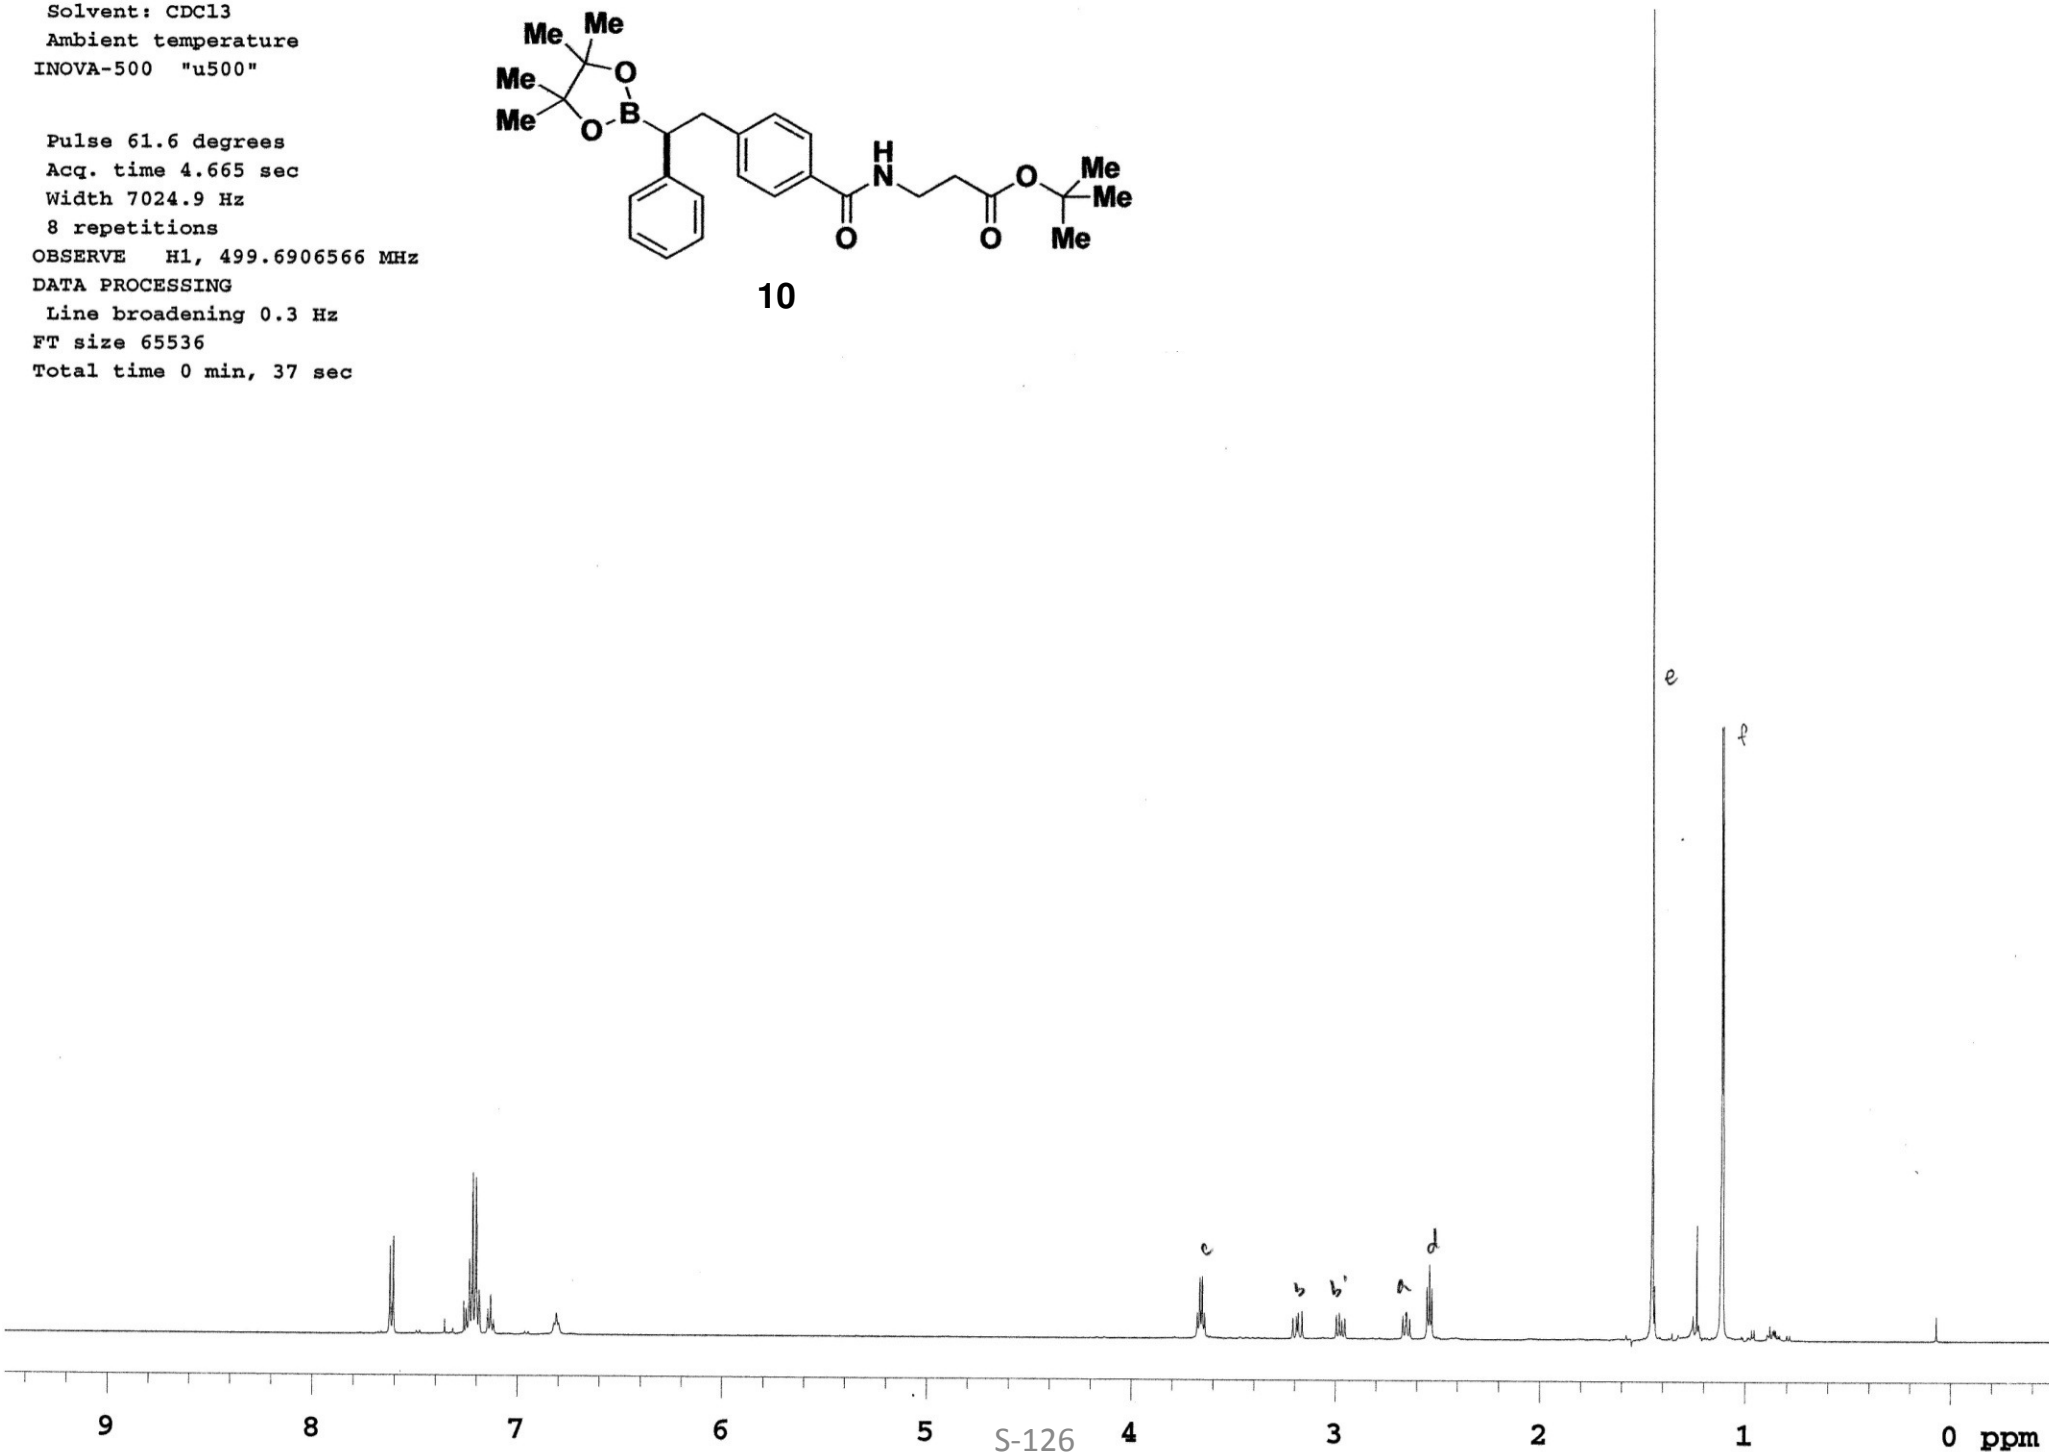

Pulse Sequence: s2pul

Solvent: CDC13  
Ambient temperature  
User: 1-14-87  
INOVA-500 "vxr500"

Relax. delay 1.000 sec  
Pulse 45.0 degrees  
Acq. time 1.024 sec  
Width 32000.0 Hz  
160 repetitions  
OBSERVE C13, 125.5817522 MHz  
DECOUPLE H1, 499.4315638 MHz  
Power 48 dB  
continuously on  
WALTZ-16 modulated  
DATA PROCESSING  
Line broadening 1.0 Hz  
FT size 65536  
Total time 33 min, 54 sec

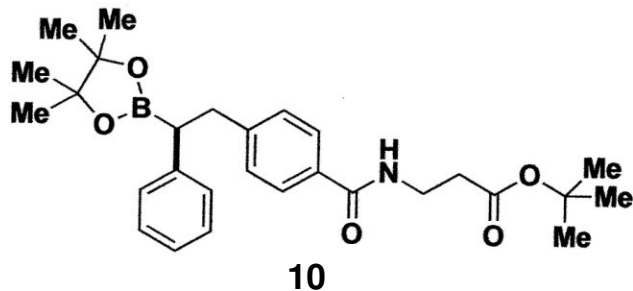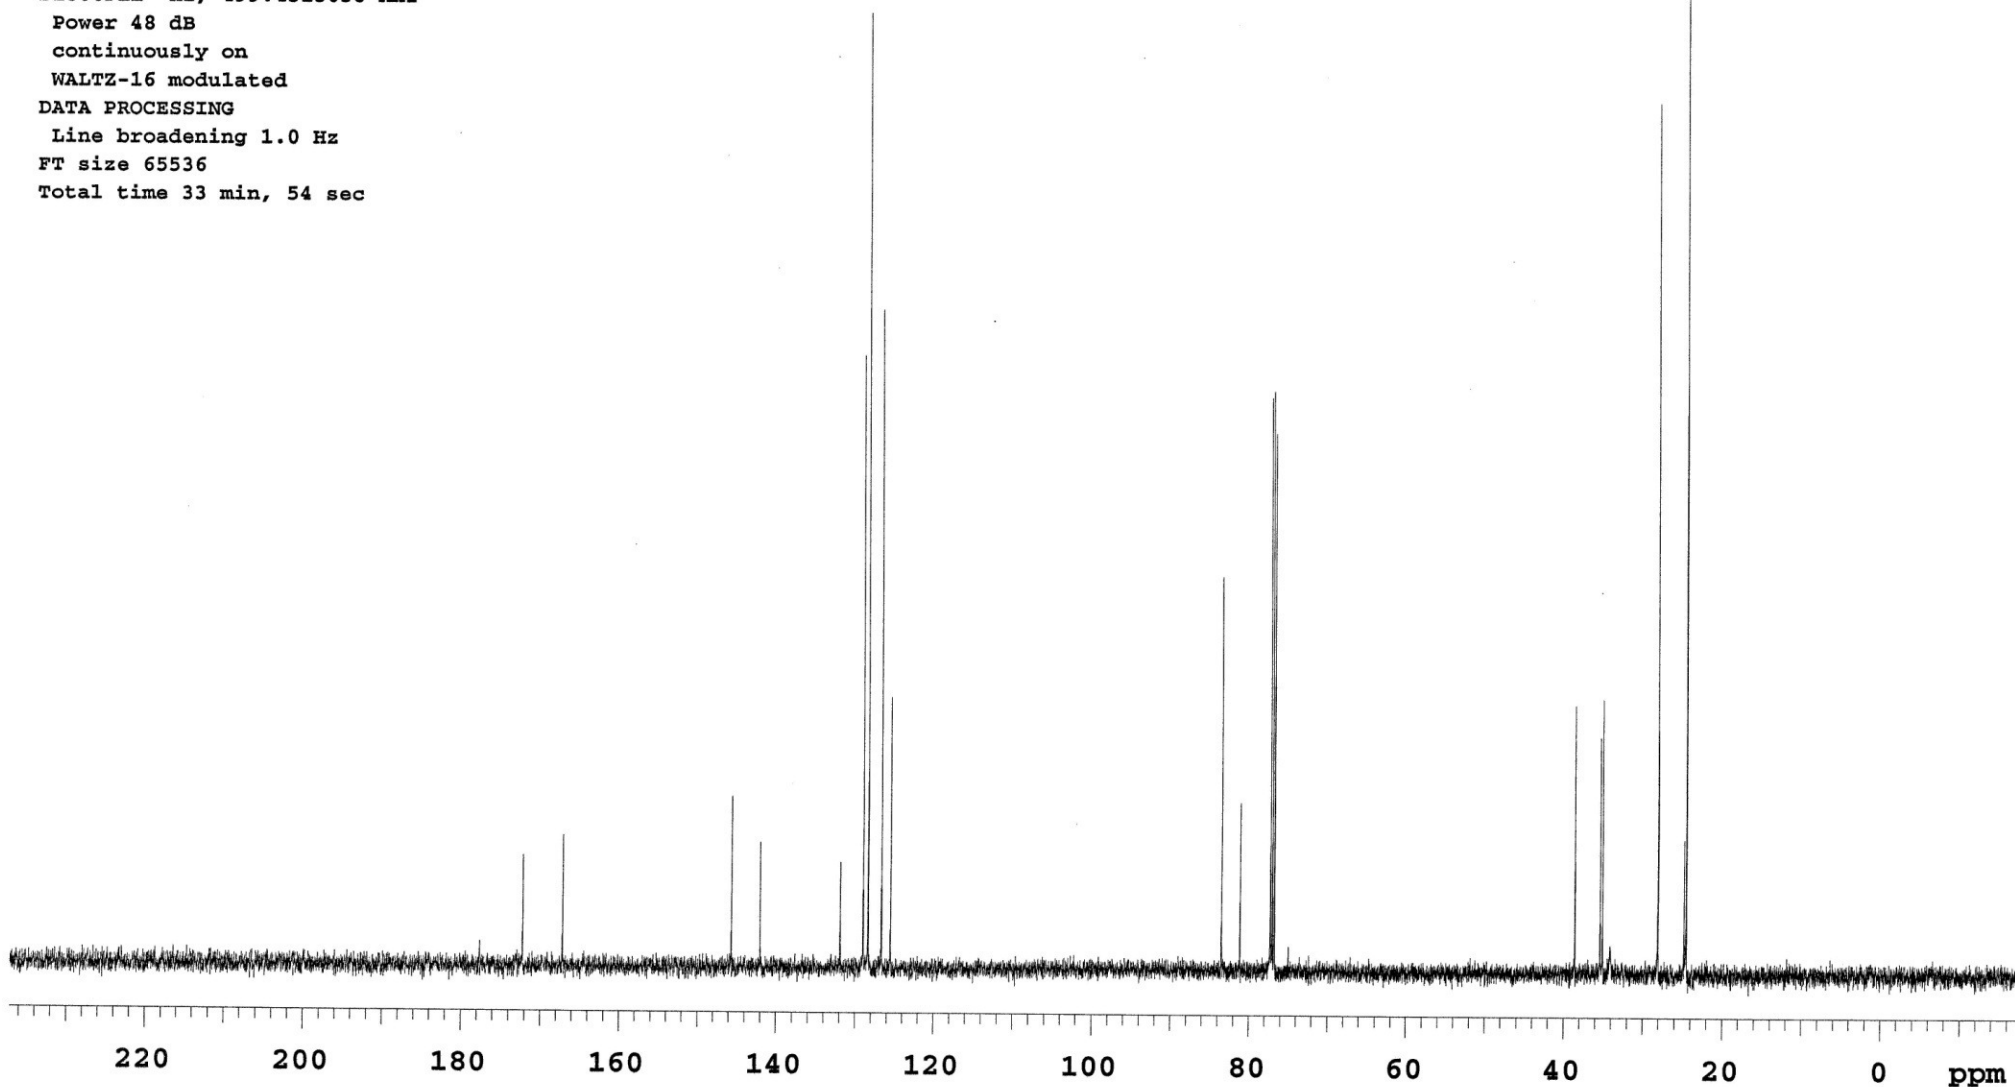

Pulse Sequence: s2pul

Solvent: CDCl3  
Ambient temperature  
INOVA-500 "vkr500"

Pulse 45.0 degrees  
Acq. time 4.096 sec  
Width 8000.0 Hz  
32 repetitions  
OBSERVE H1, 499.4298995 MHz  
DATA PROCESSING  
Line broadening 0.3 Hz  
FT size 65536  
Total time 2 min, 11 sec

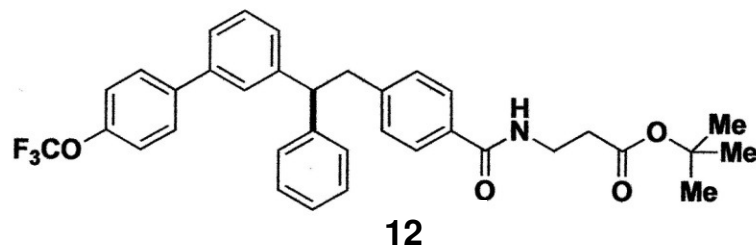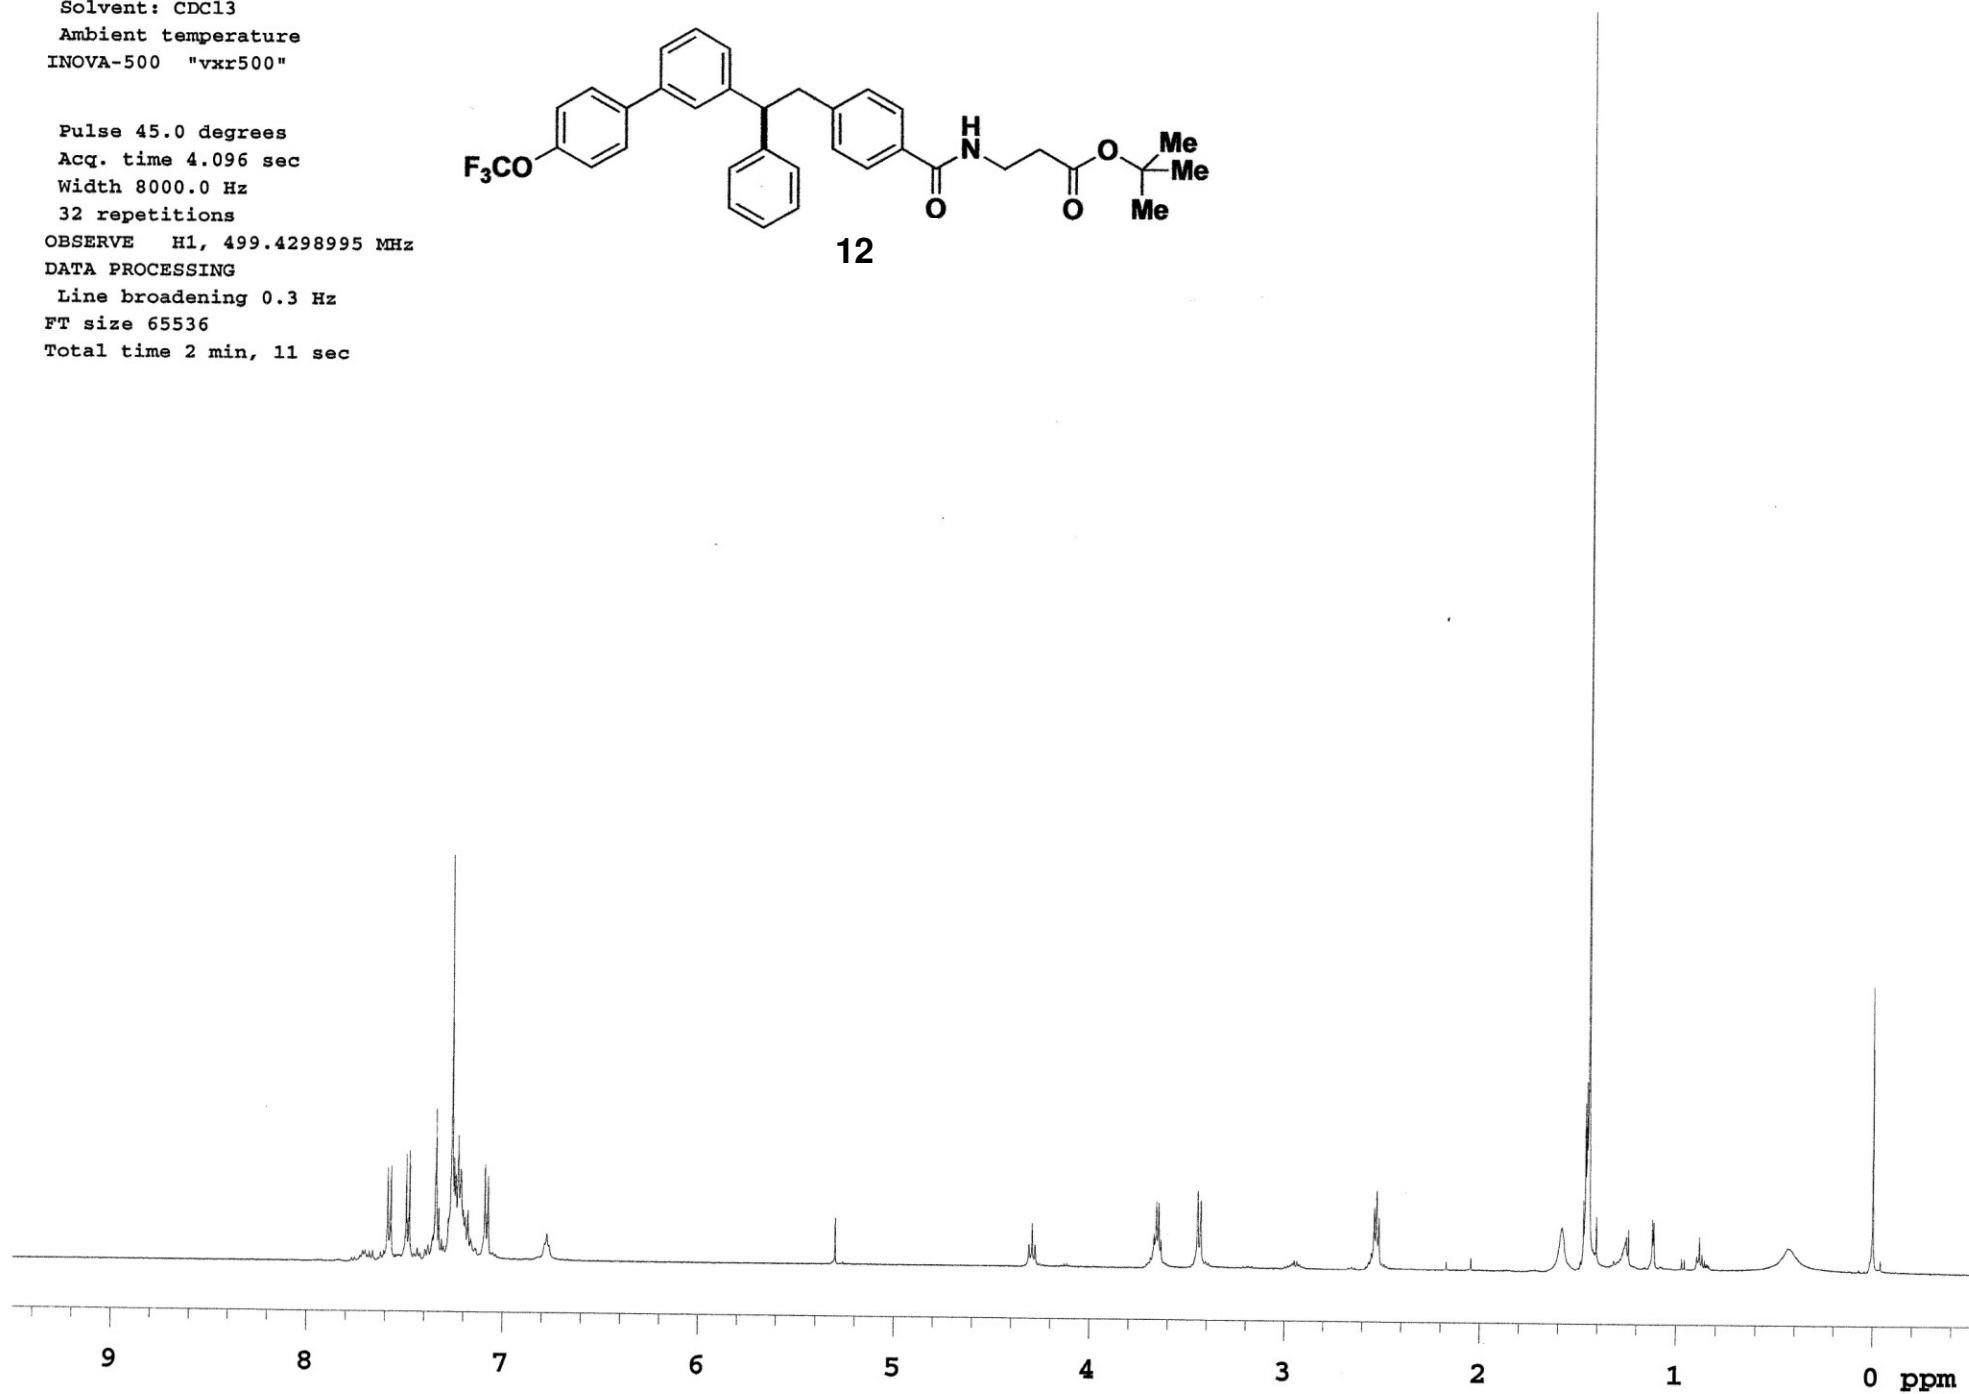



Pulse Sequence: s2pul

Solvent: CDCl3  
Ambient temperature  
User: 1-14-87  
File: C13\_062111\_JL\_264B  
INOVA-500 "sunds1"

Relax. delay 1.000 sec  
Pulse 45.0 degrees  
Acq. time 1.024 sec  
Width 32000.0 Hz  
1520 repetitions  
OBSERVE C13, 125.5817473 MHz  
DECOUPLE H1, 499.4315638 MHz  
Power 48 dB  
continuously on  
WALTZ-16 modulated  
DATA PROCESSING  
Line broadening 1.0 Hz  
FT size 65536  
Total time 5 hr, 38 min, 51 sec

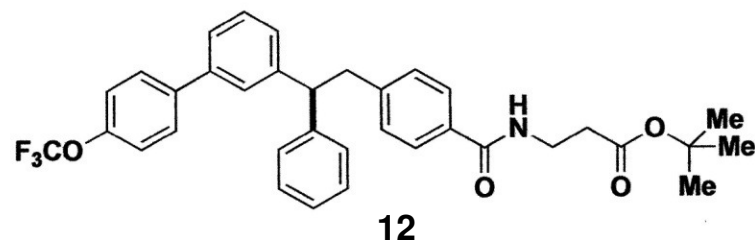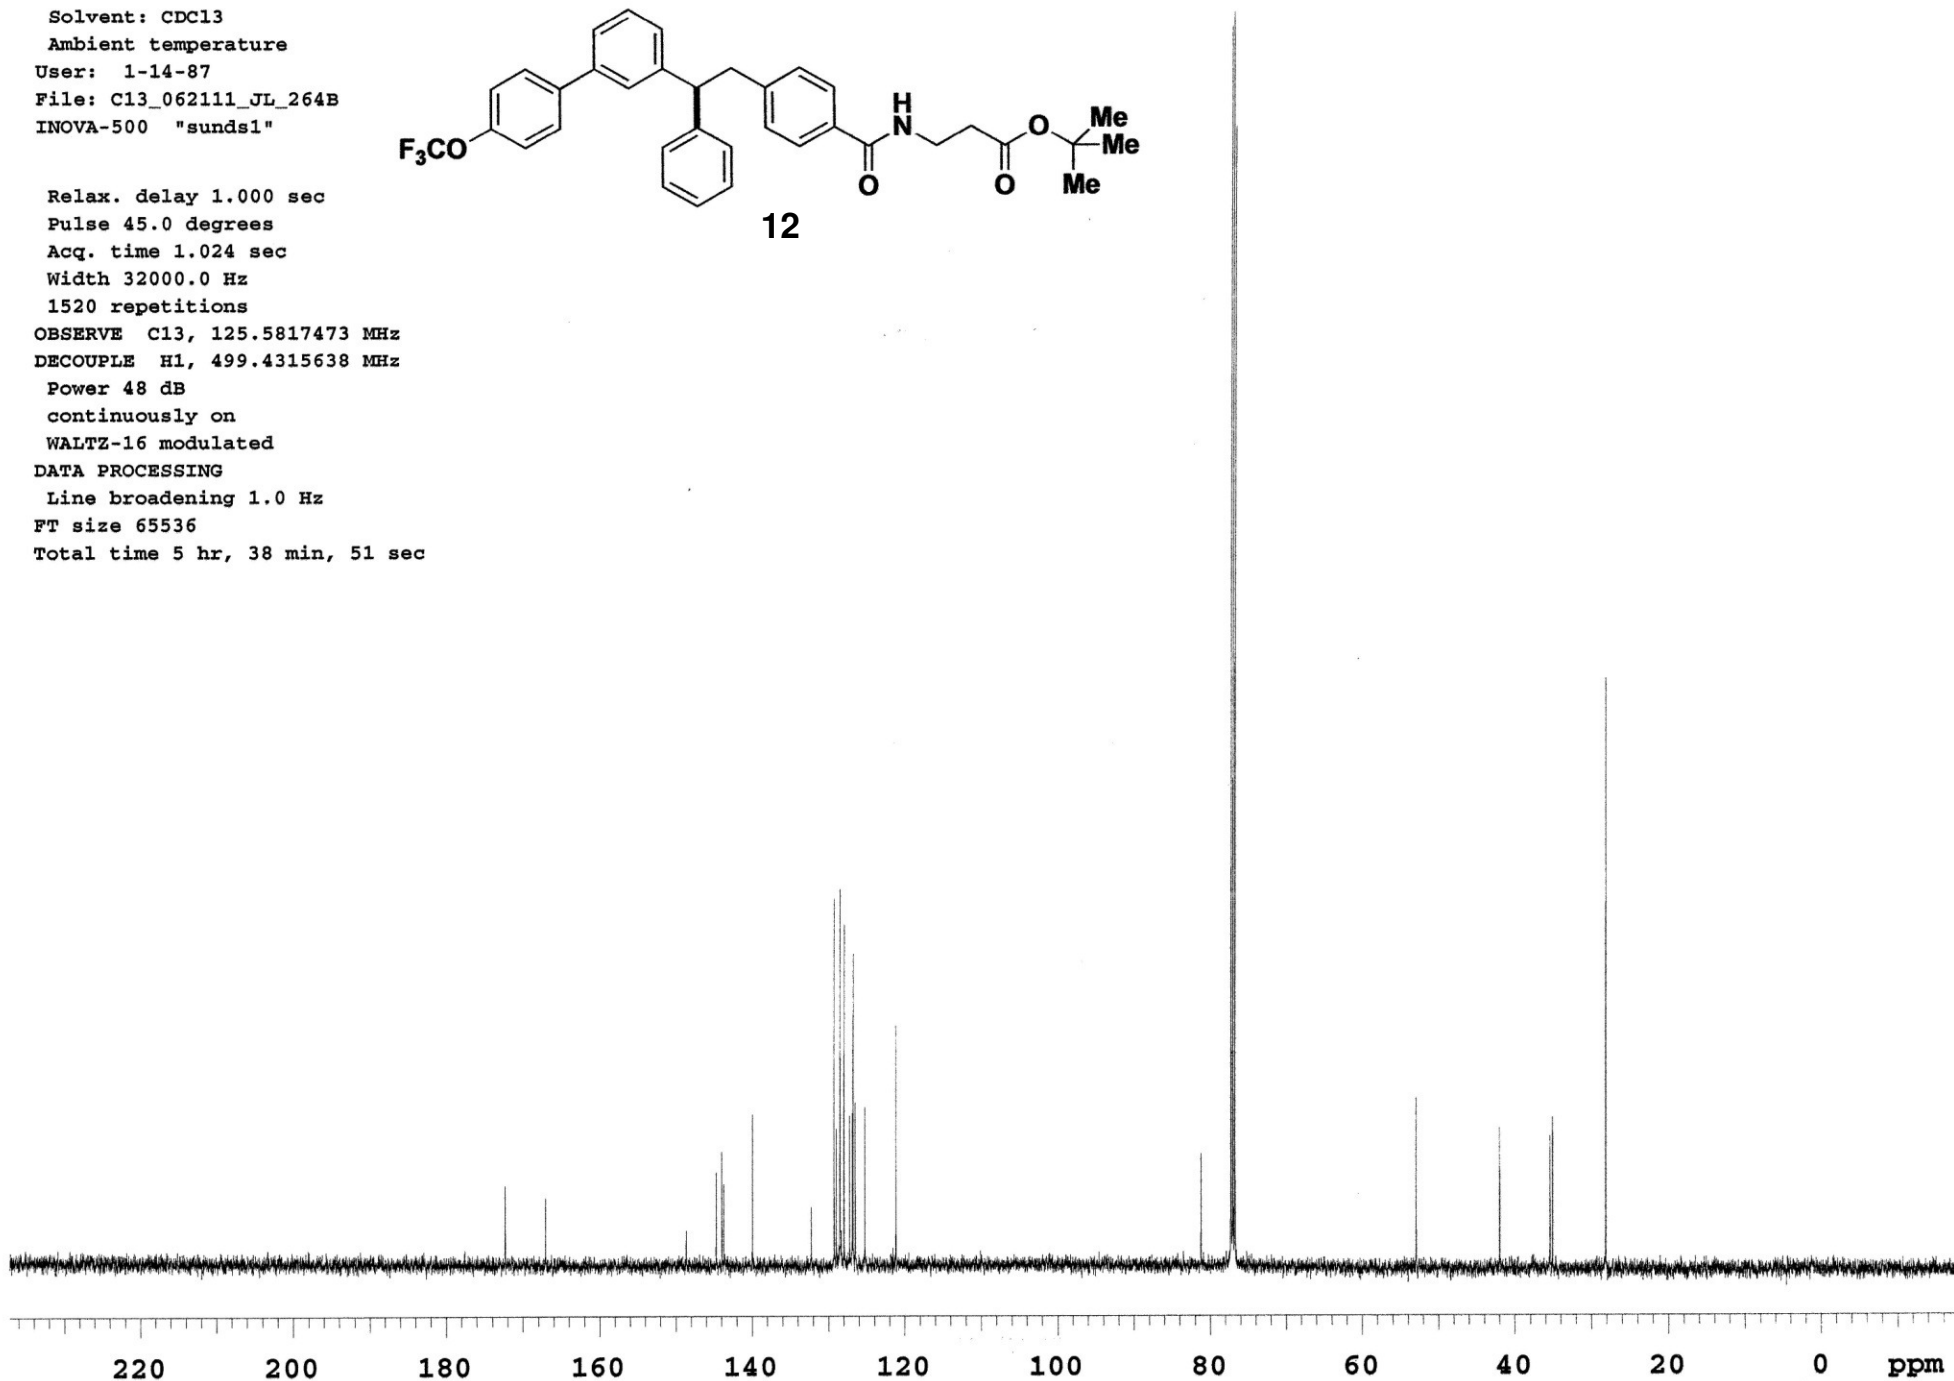

Pulse Sequence: s2pul

Solvent: CDCl3  
Ambient temperature  
INOVA-500 "ui500nb"

Pulse 90.0 degrees  
Acq. time 4.096 sec  
Width 8000.0 Hz  
4 repetitions  
OBSERVE H1, 500.0677753 MHz  
DATA PROCESSING  
Line broadening 0.3 Hz  
FT size 65536  
Total time 0 min, 16 sec

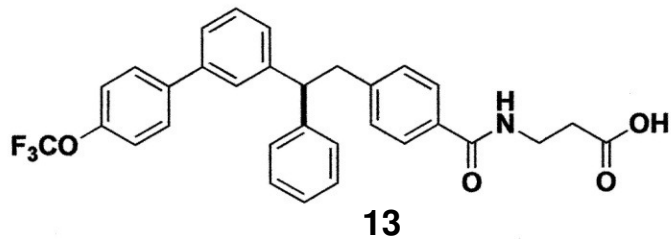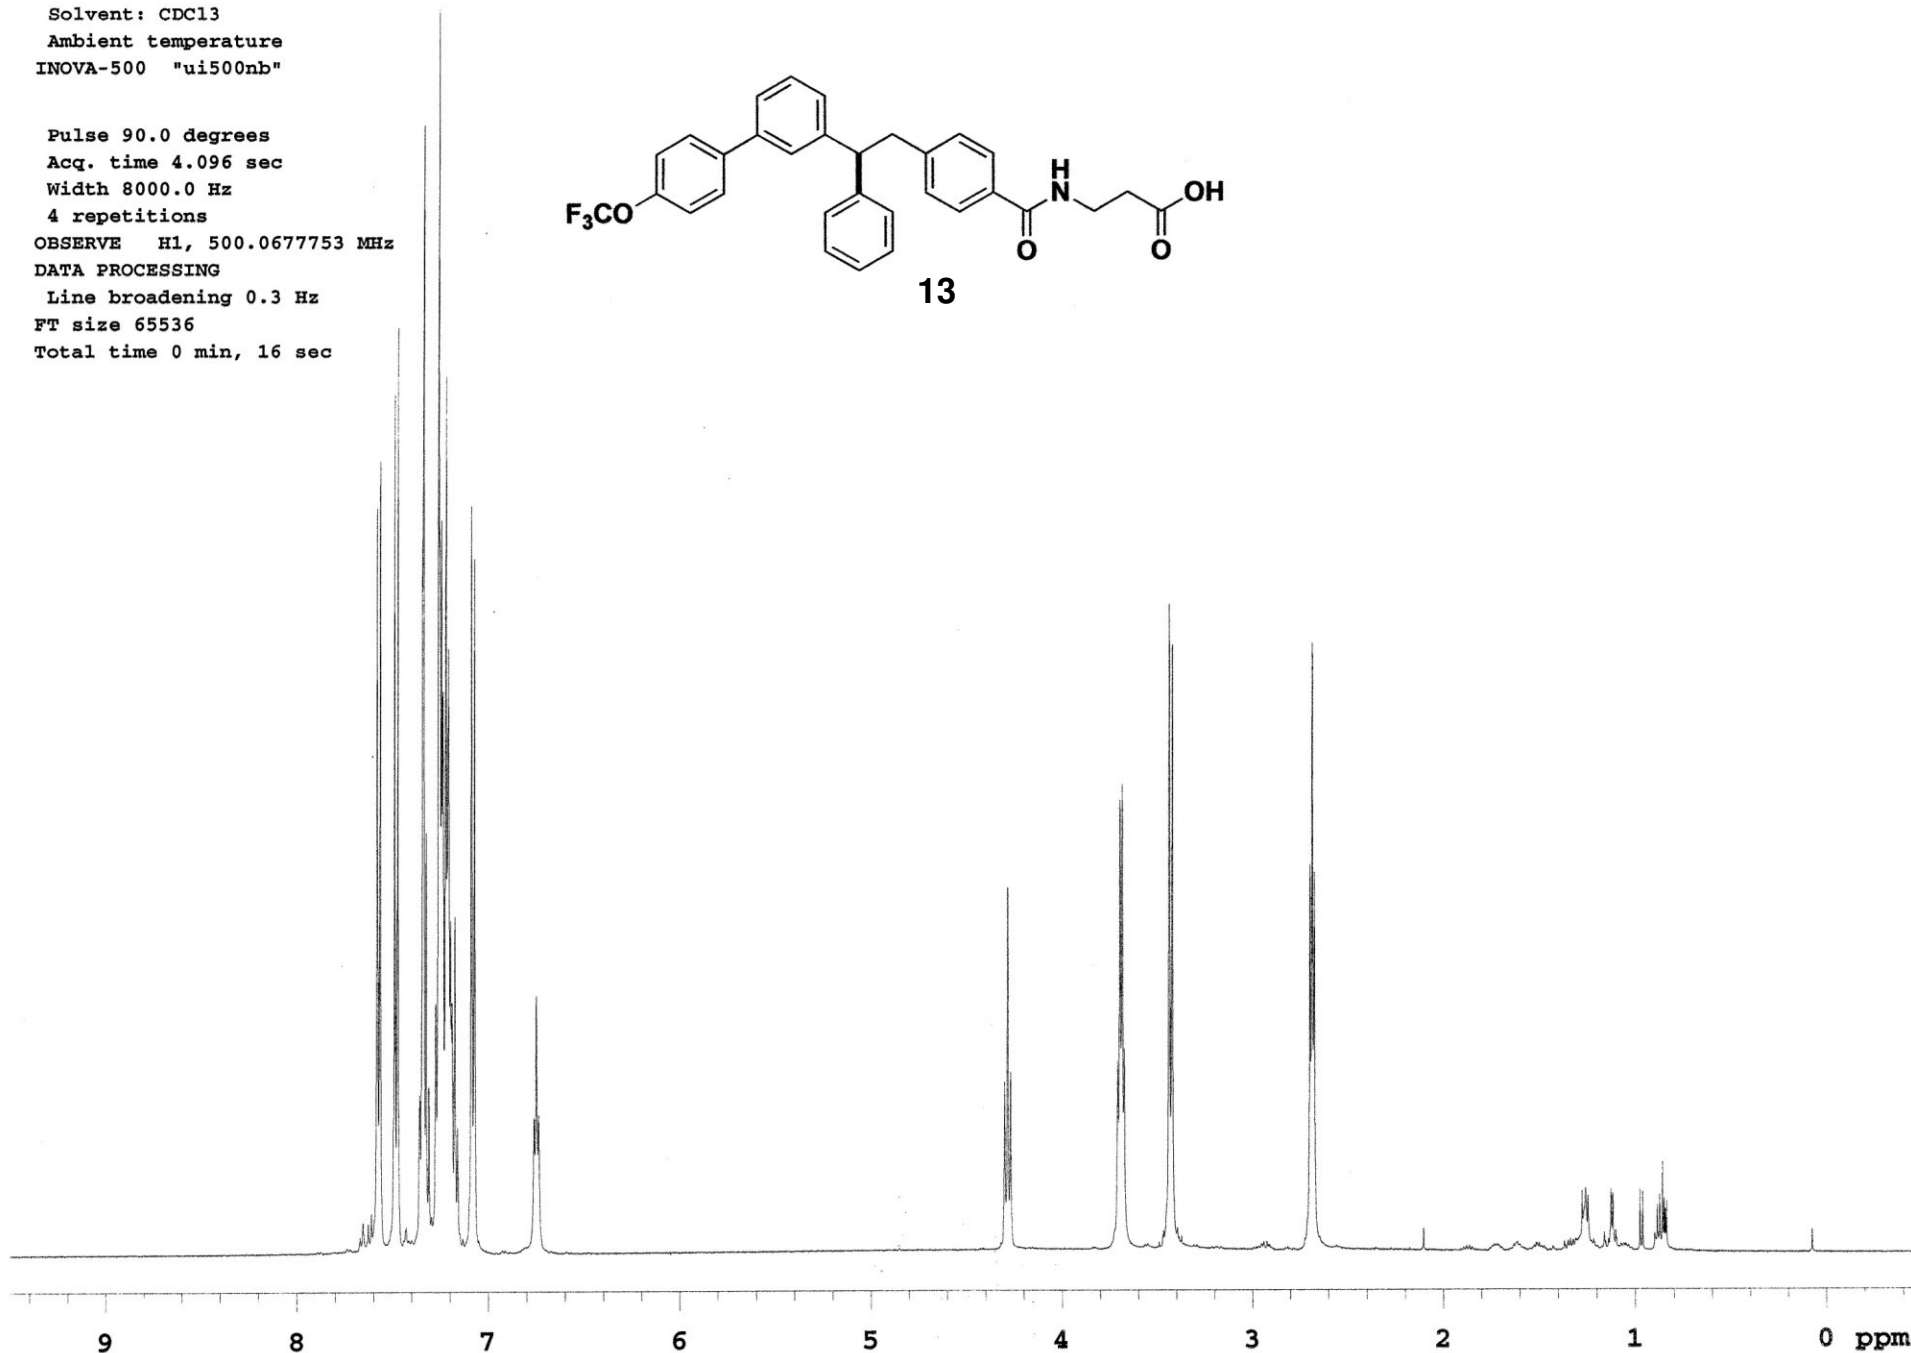

Pulse Sequence: s2pul

Solvent: CDC13

Ambient temperature

User: 1-14-87

File: C13\_062211\_JL\_265A

INOVA-500 "sunds1"

Relax. delay 1.000 sec

Pulse 45.0 degrees

Acq. time 1.024 sec

Width 32000.0 Hz

2704 repetitions

OBSERVE C13, 125.5817483 MHz

DECOUPLE H1, 499.4315638 MHz

Power 48 dB

continuously on

WALTZ-16 modulated

DATA PROCESSING

Line broadening 1.0 Hz

FT size 65536

Total time 5 hr, 38 min, 51 sec

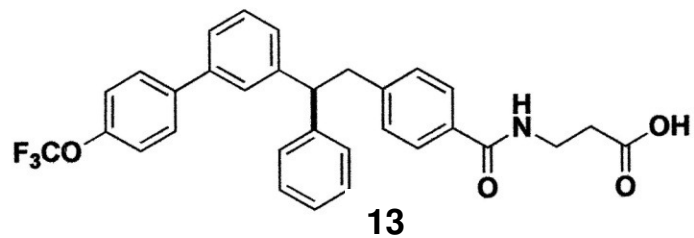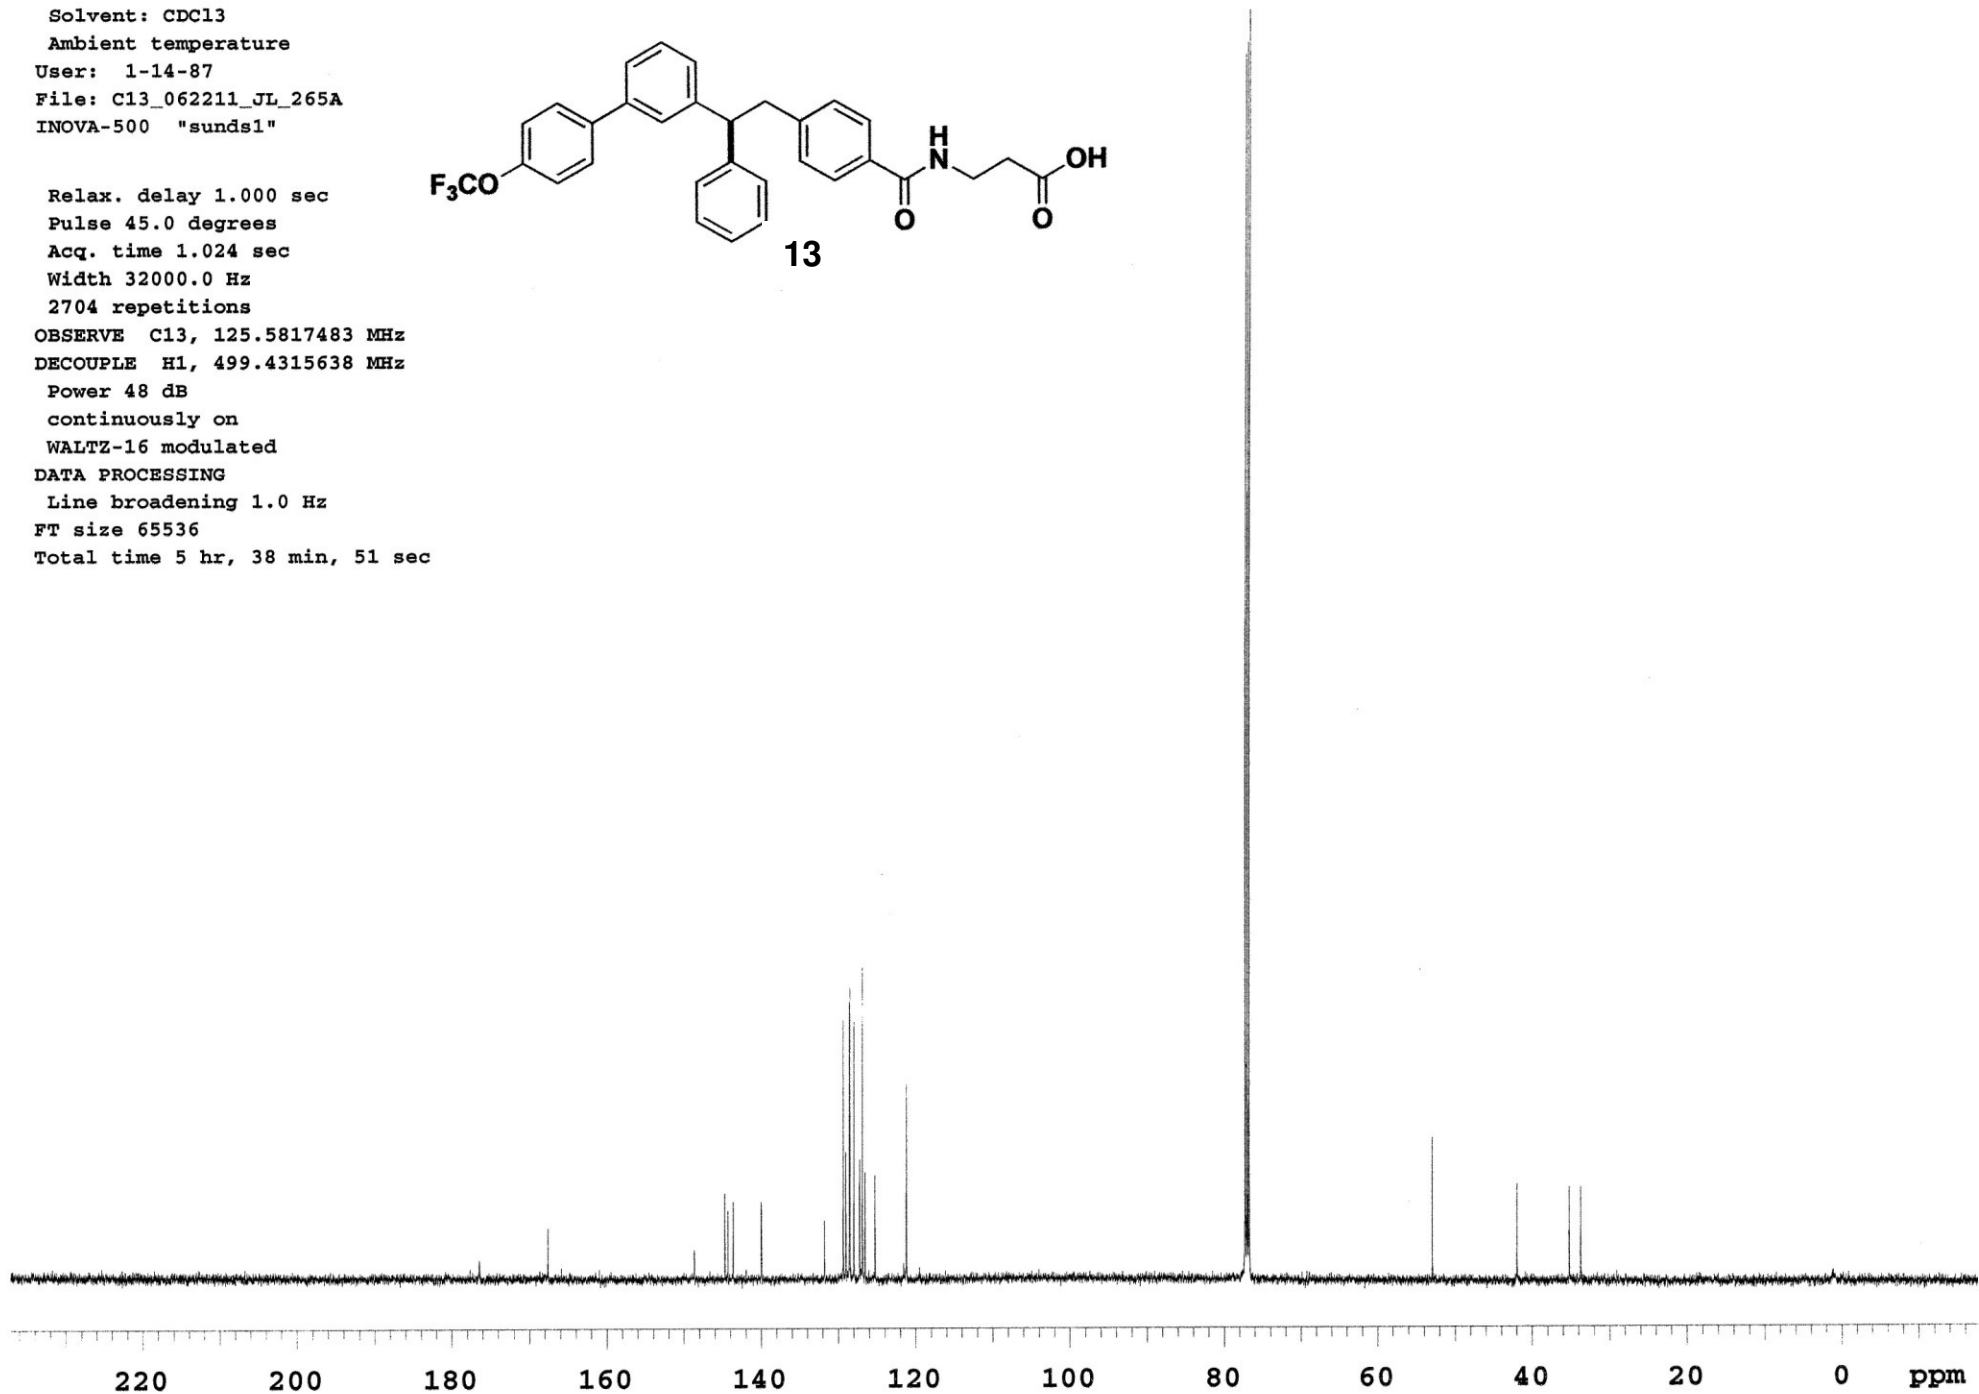

Pulse Sequence: s2pul

Solvent: Acetone  
Ambient temperature  
INOVA-500 "vvr500"

Pulse 45.0 degrees  
Acq. time 4.096 sec  
Width 8000.0 Hz  
8 repetitions  
OBSERVE H1, 499.4324931 MHz  
DATA PROCESSING  
Line broadening 0.3 Hz  
FT size 65536  
Total time 0 min, 32 sec

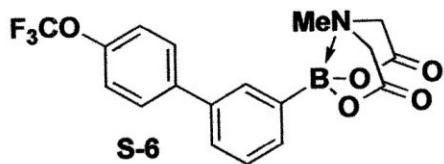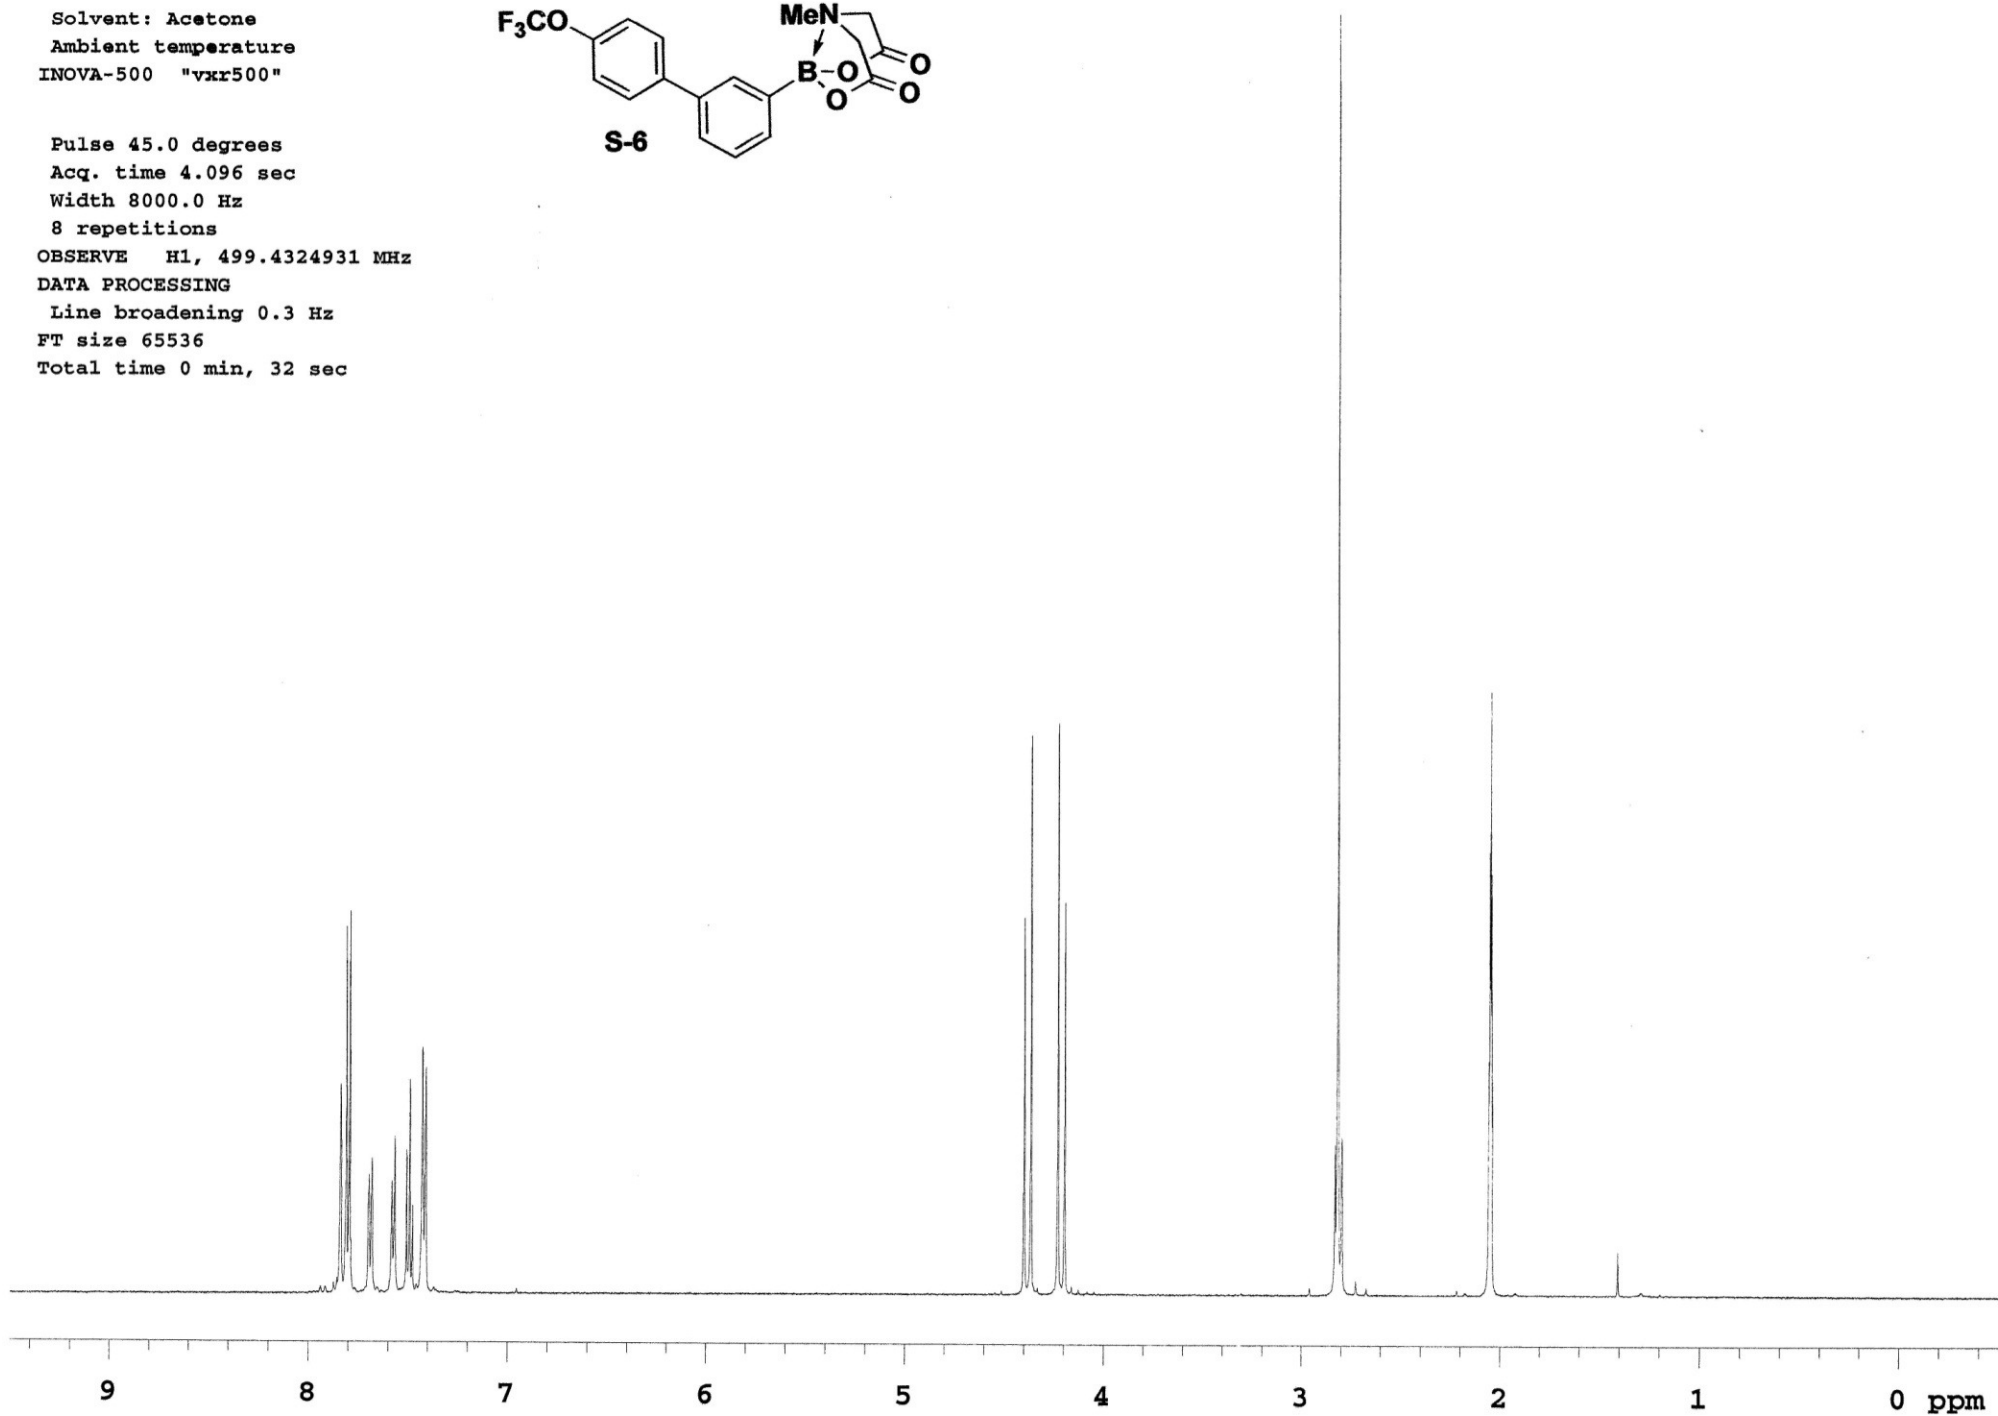

S-132

C13\_041811\_JL\_245C

Pulse Sequence: s2pul

Solvent: Acetone  
Ambient temperature

User: 1-14-87

INOVA-500 "vkr500"

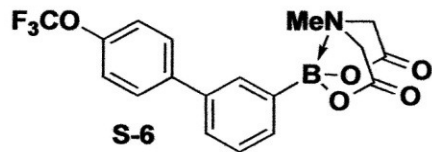

Relax. delay 1.000 sec  
Pulse 45.0 degrees  
Acq. time 1.024 sec  
Width 32000.0 Hz  
208 repetitions  
OBSERVE C13, 125.5822904 MHz  
DECOUPLE H1, 499.4341558 MHz  
Power 48 dB  
continuously on  
WALTZ-16 modulated  
DATA PROCESSING  
Line broadening 1.0 Hz  
FT size 65536  
Total time 33 min, 54 sec

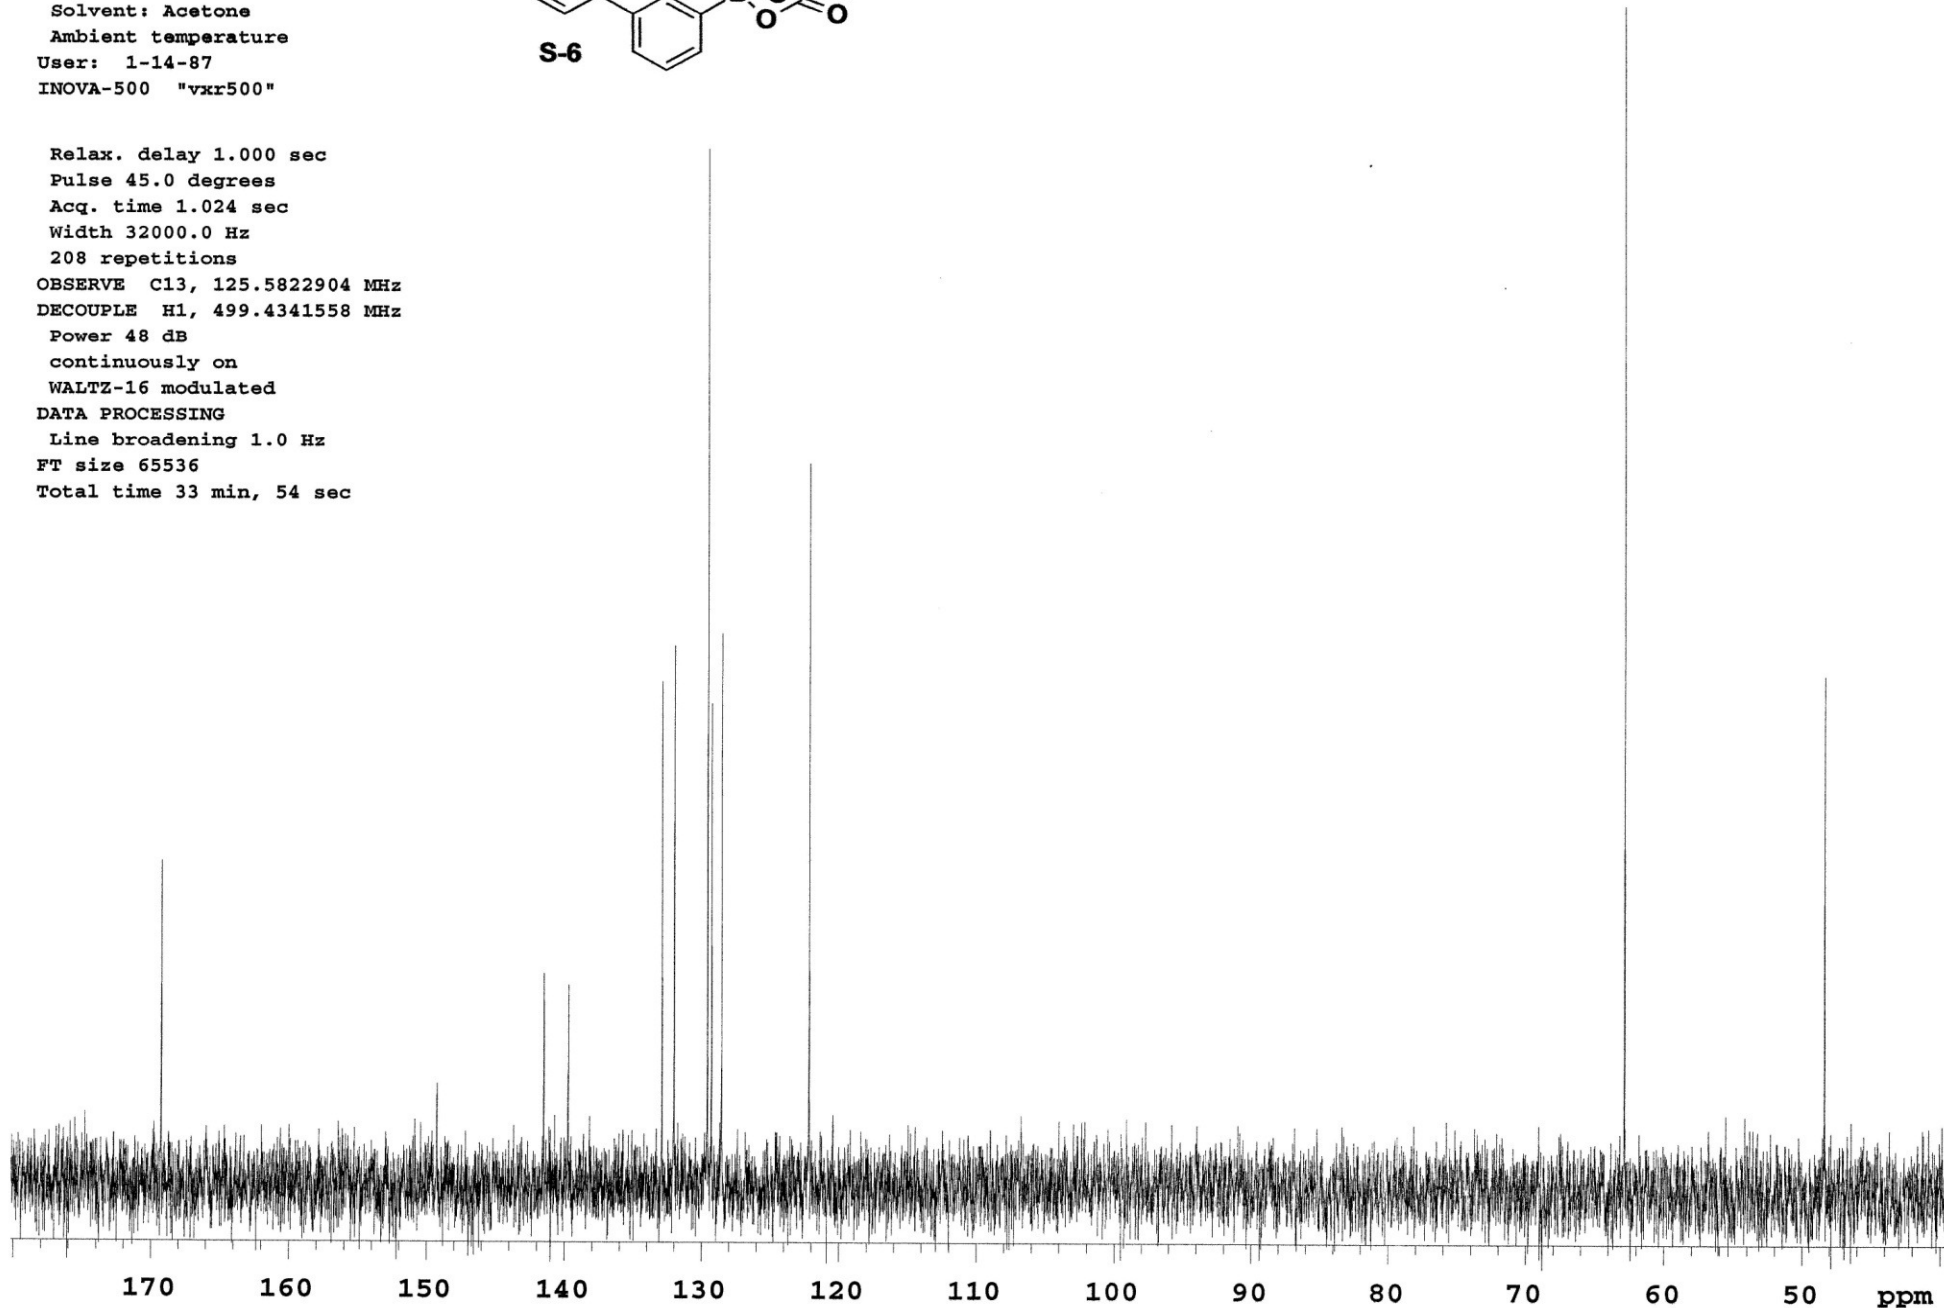

Pulse Sequence: s2pul

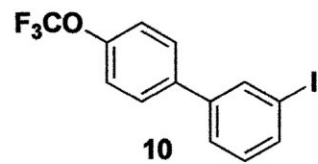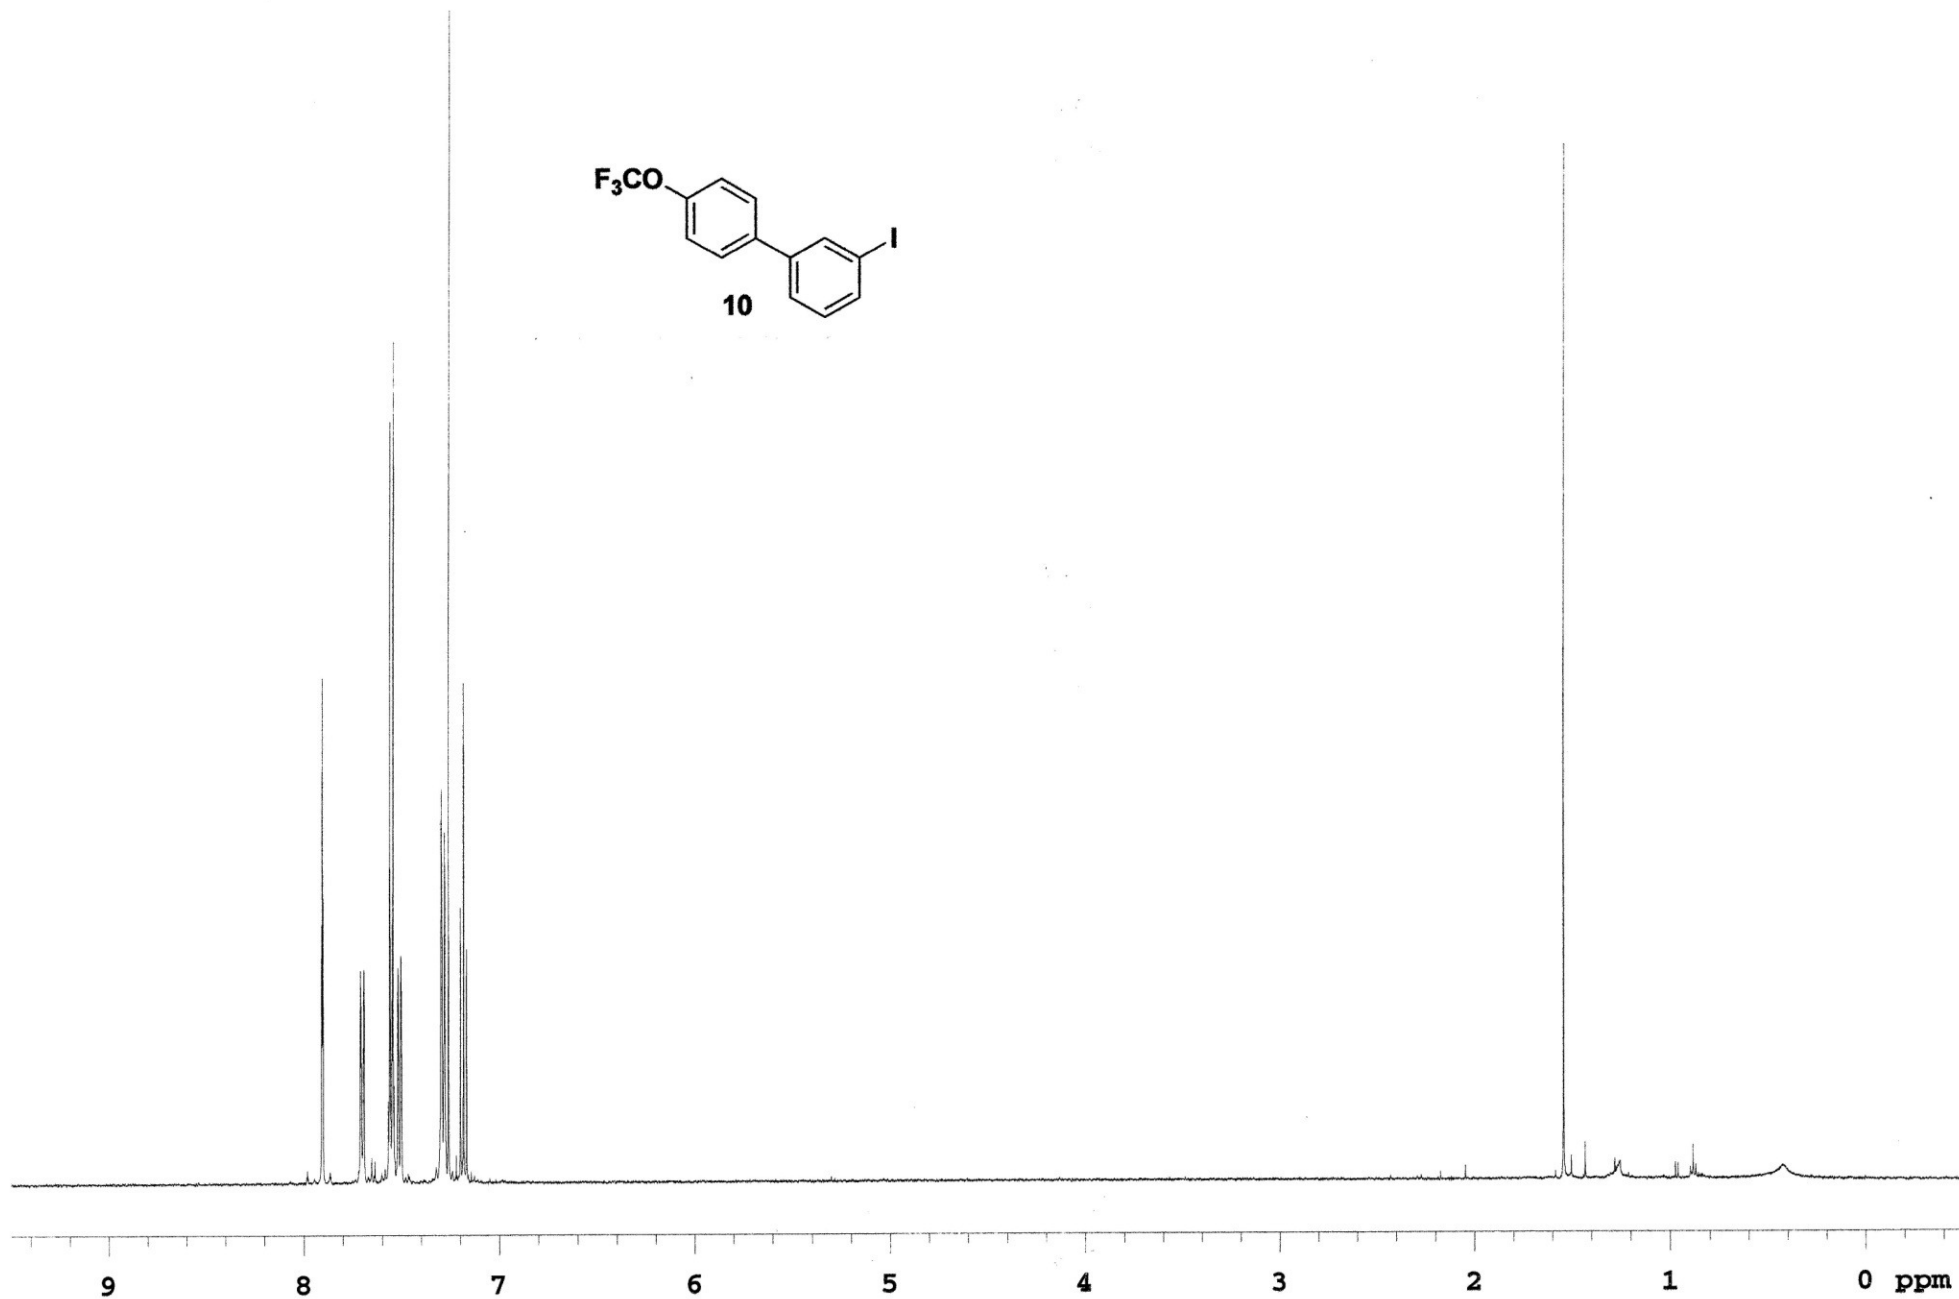

Pulse Sequence: s2pul

Solvent: CDCl3

Ambient temperature

User: 1-14-87

INOVA-500 "u500"

Relax. delay 1.000 sec

Pulse 42.4 degrees

Acq. time 1.086 sec

Width 30165.9 Hz

448 repetitions

OBSERVE C13, 125.6473175 MHz

DECOUPLE H1, 499.6923275 MHz

Power 44 dB

continuously on

WALTZ-16 modulated

DATA PROCESSING

Line broadening 1.0 Hz

FT size 65536

Total time 34 min, 57 sec

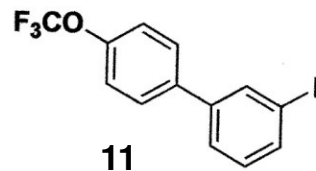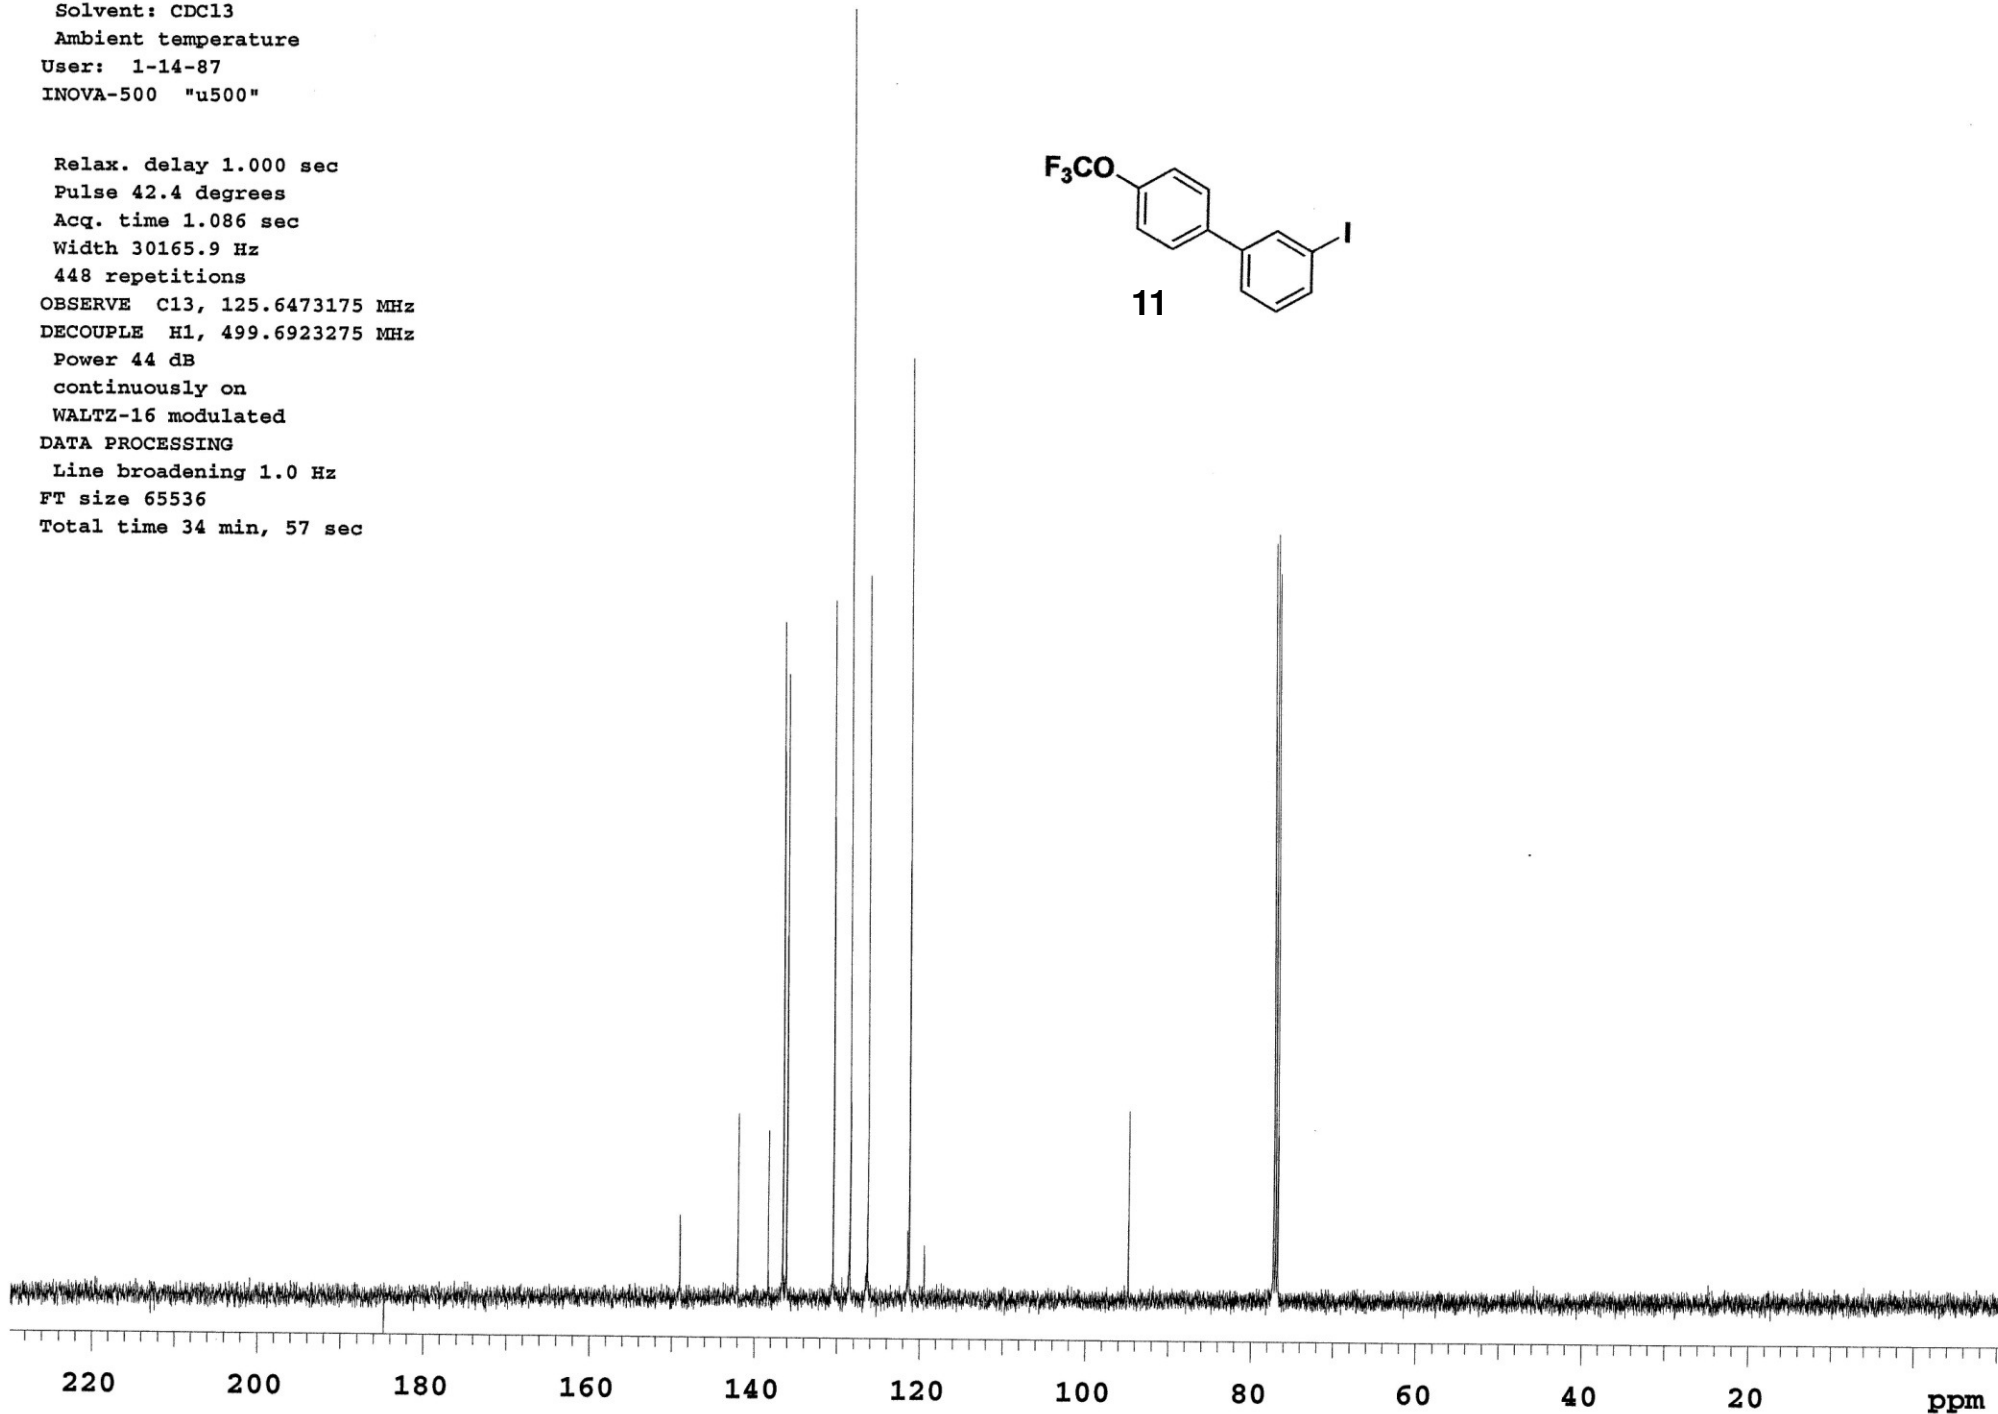

Pulse Sequence: s2pul

Solvent: Acetone  
Ambient temperature  
Operator: user1d  
INOVA-400 "u400"

Pulse 45.0 degrees  
Acq. time 4.096 sec  
Width 8000.0 Hz  
8 repetitions  
OBSERVE H1, 399.9475026 MHz  
DATA PROCESSING  
Line broadening 0.3 Hz  
FT size 65536  
Total time 0 min, 32 sec

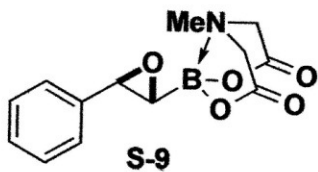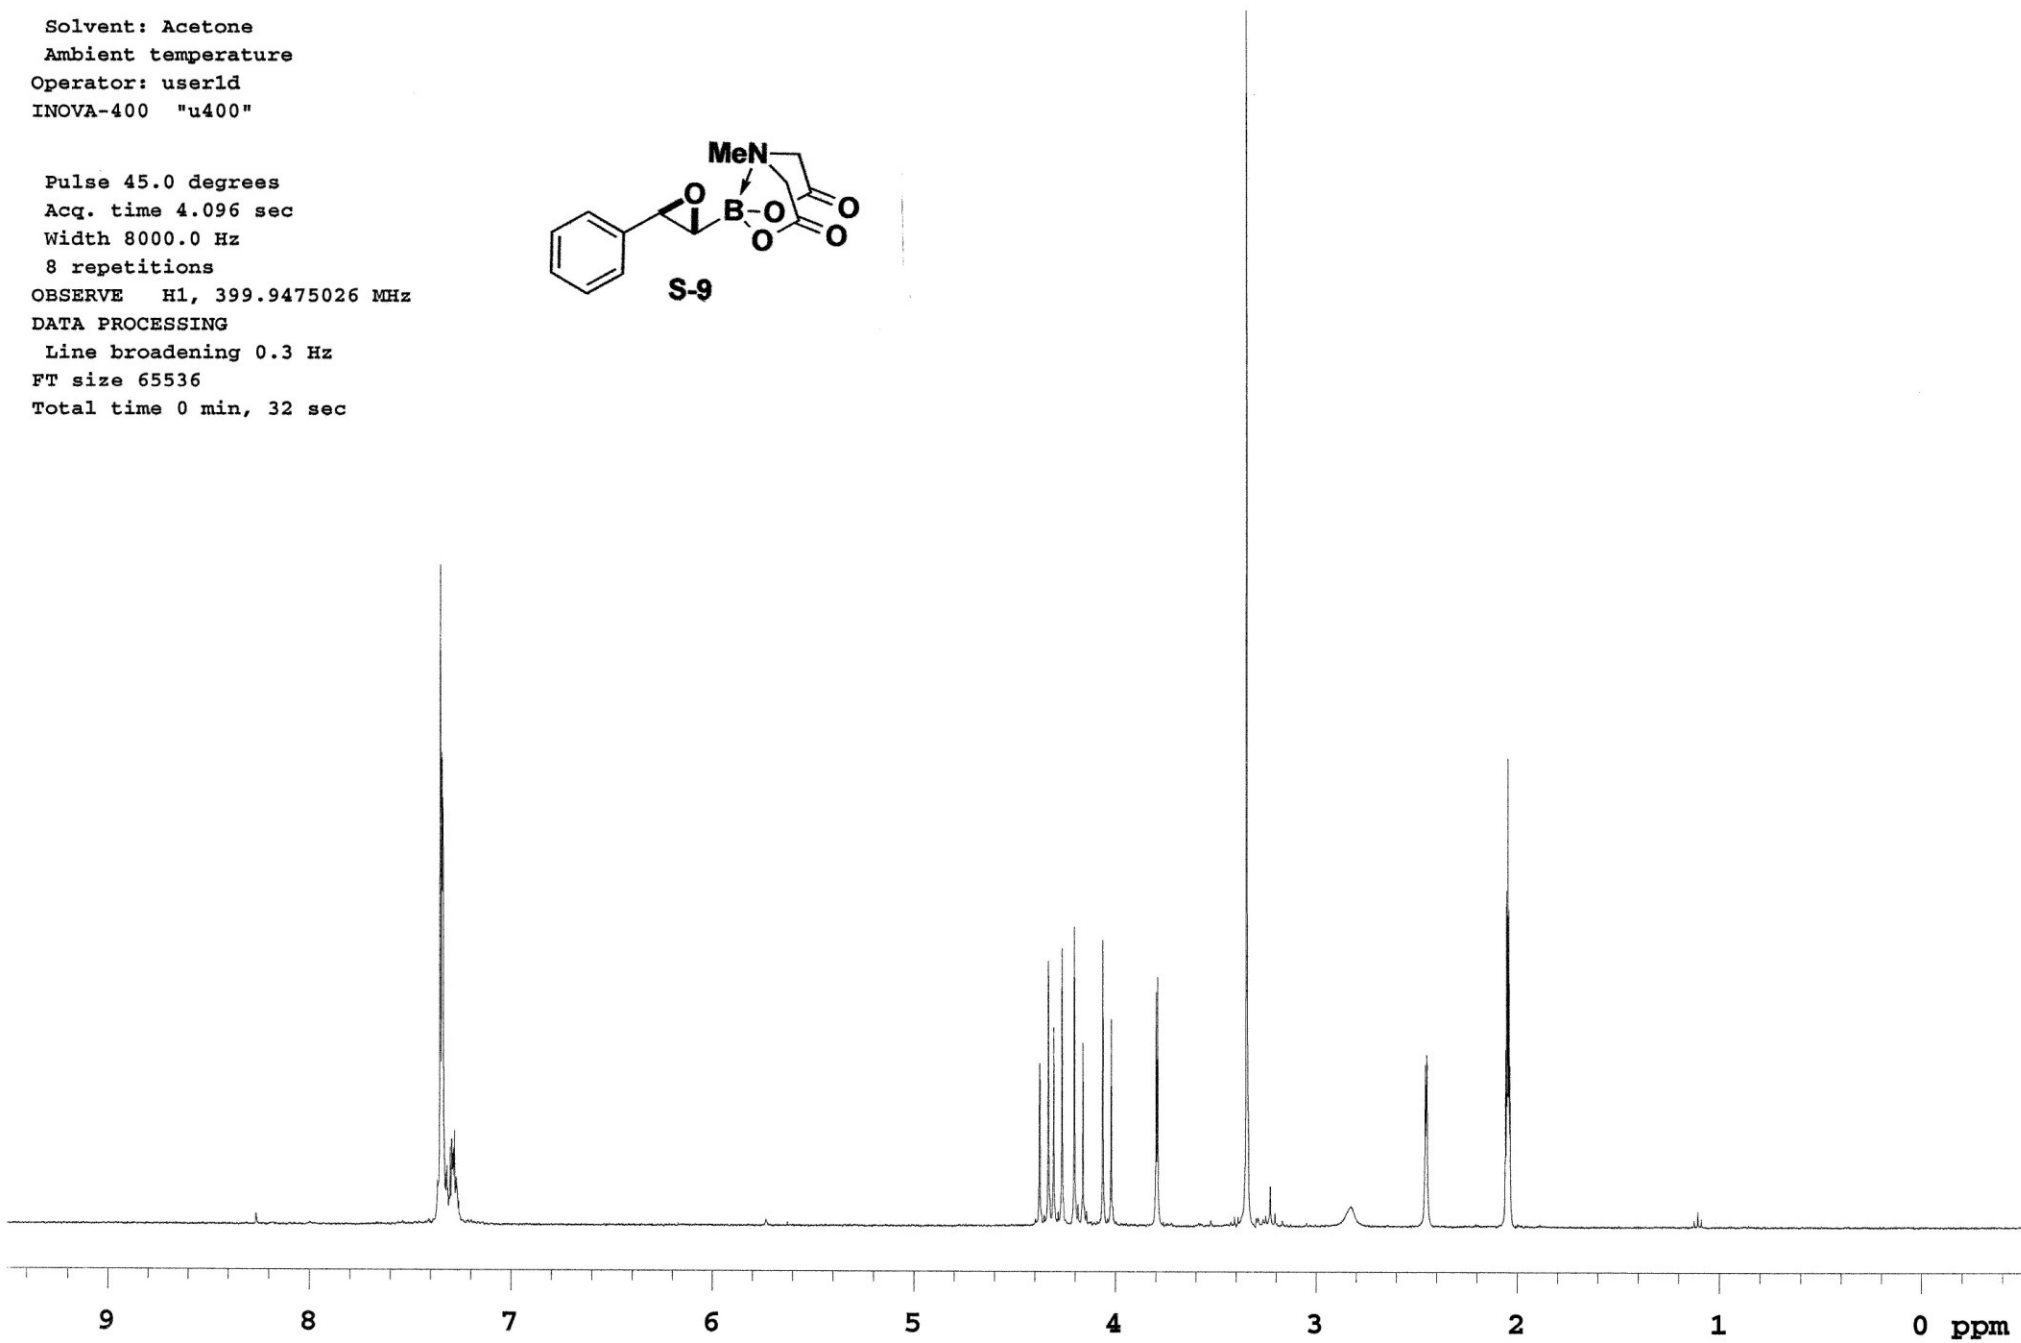



Pulse Sequence: s2pul

Solvent: Acetone  
Ambient temperature  
User: 1-14-87  
INOVA-500 "u500"

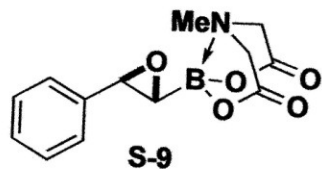

Relax. delay 1.000 sec  
Pulse 42.4 degrees  
Acq. time 1.086 sec  
Width 30165.9 Hz  
240 repetitions  
OBSERVE C13, 125.6478620 MHz  
DECOUPLE H1, 499.6949209 MHz  
Power 44 dB  
continuously on  
WALTZ-16 modulated  
DATA PROCESSING  
Line broadening 1.0 Hz  
FT size 65536  
Total time 34 min, 57 sec

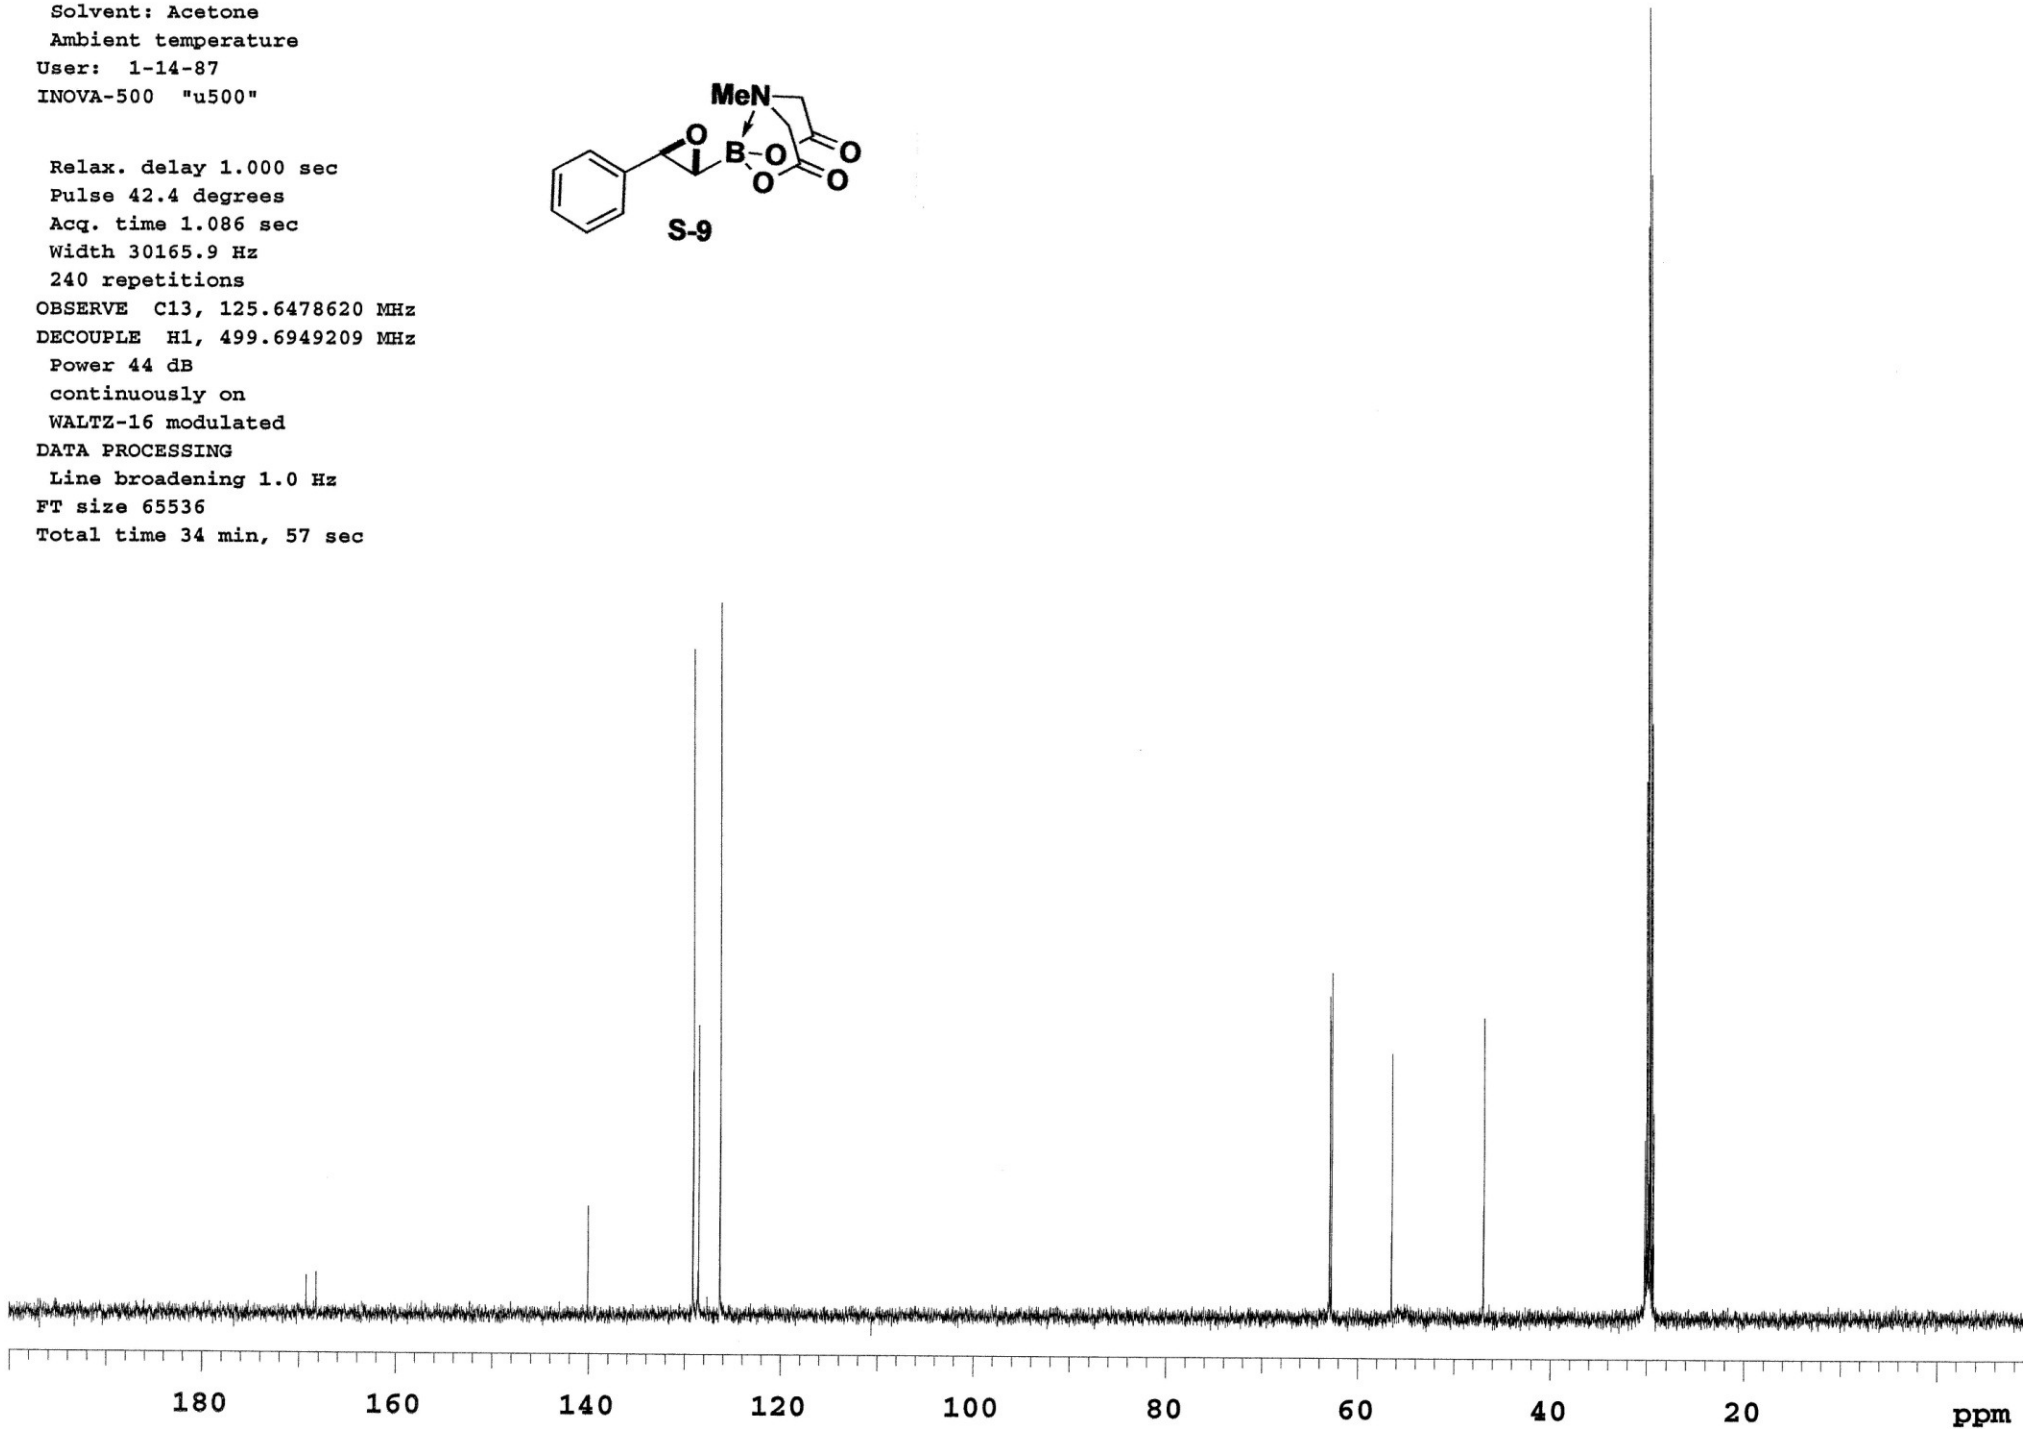

S-137

Pulse Sequence: s2pul

Solvent: Acetone

Ambient temperature

INOVA-500 "ui500nb"

Pulse 90.0 degrees

Acq. time 4.096 sec

Width 8000.0 Hz

4 repetitions

OBSERVE H1, 500.0703593 MHz

DATA PROCESSING

Line broadening 0.3 Hz

FT size 65536

Total time 0 min, 16 sec

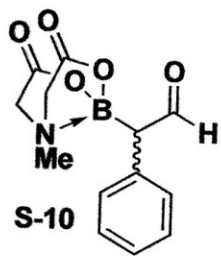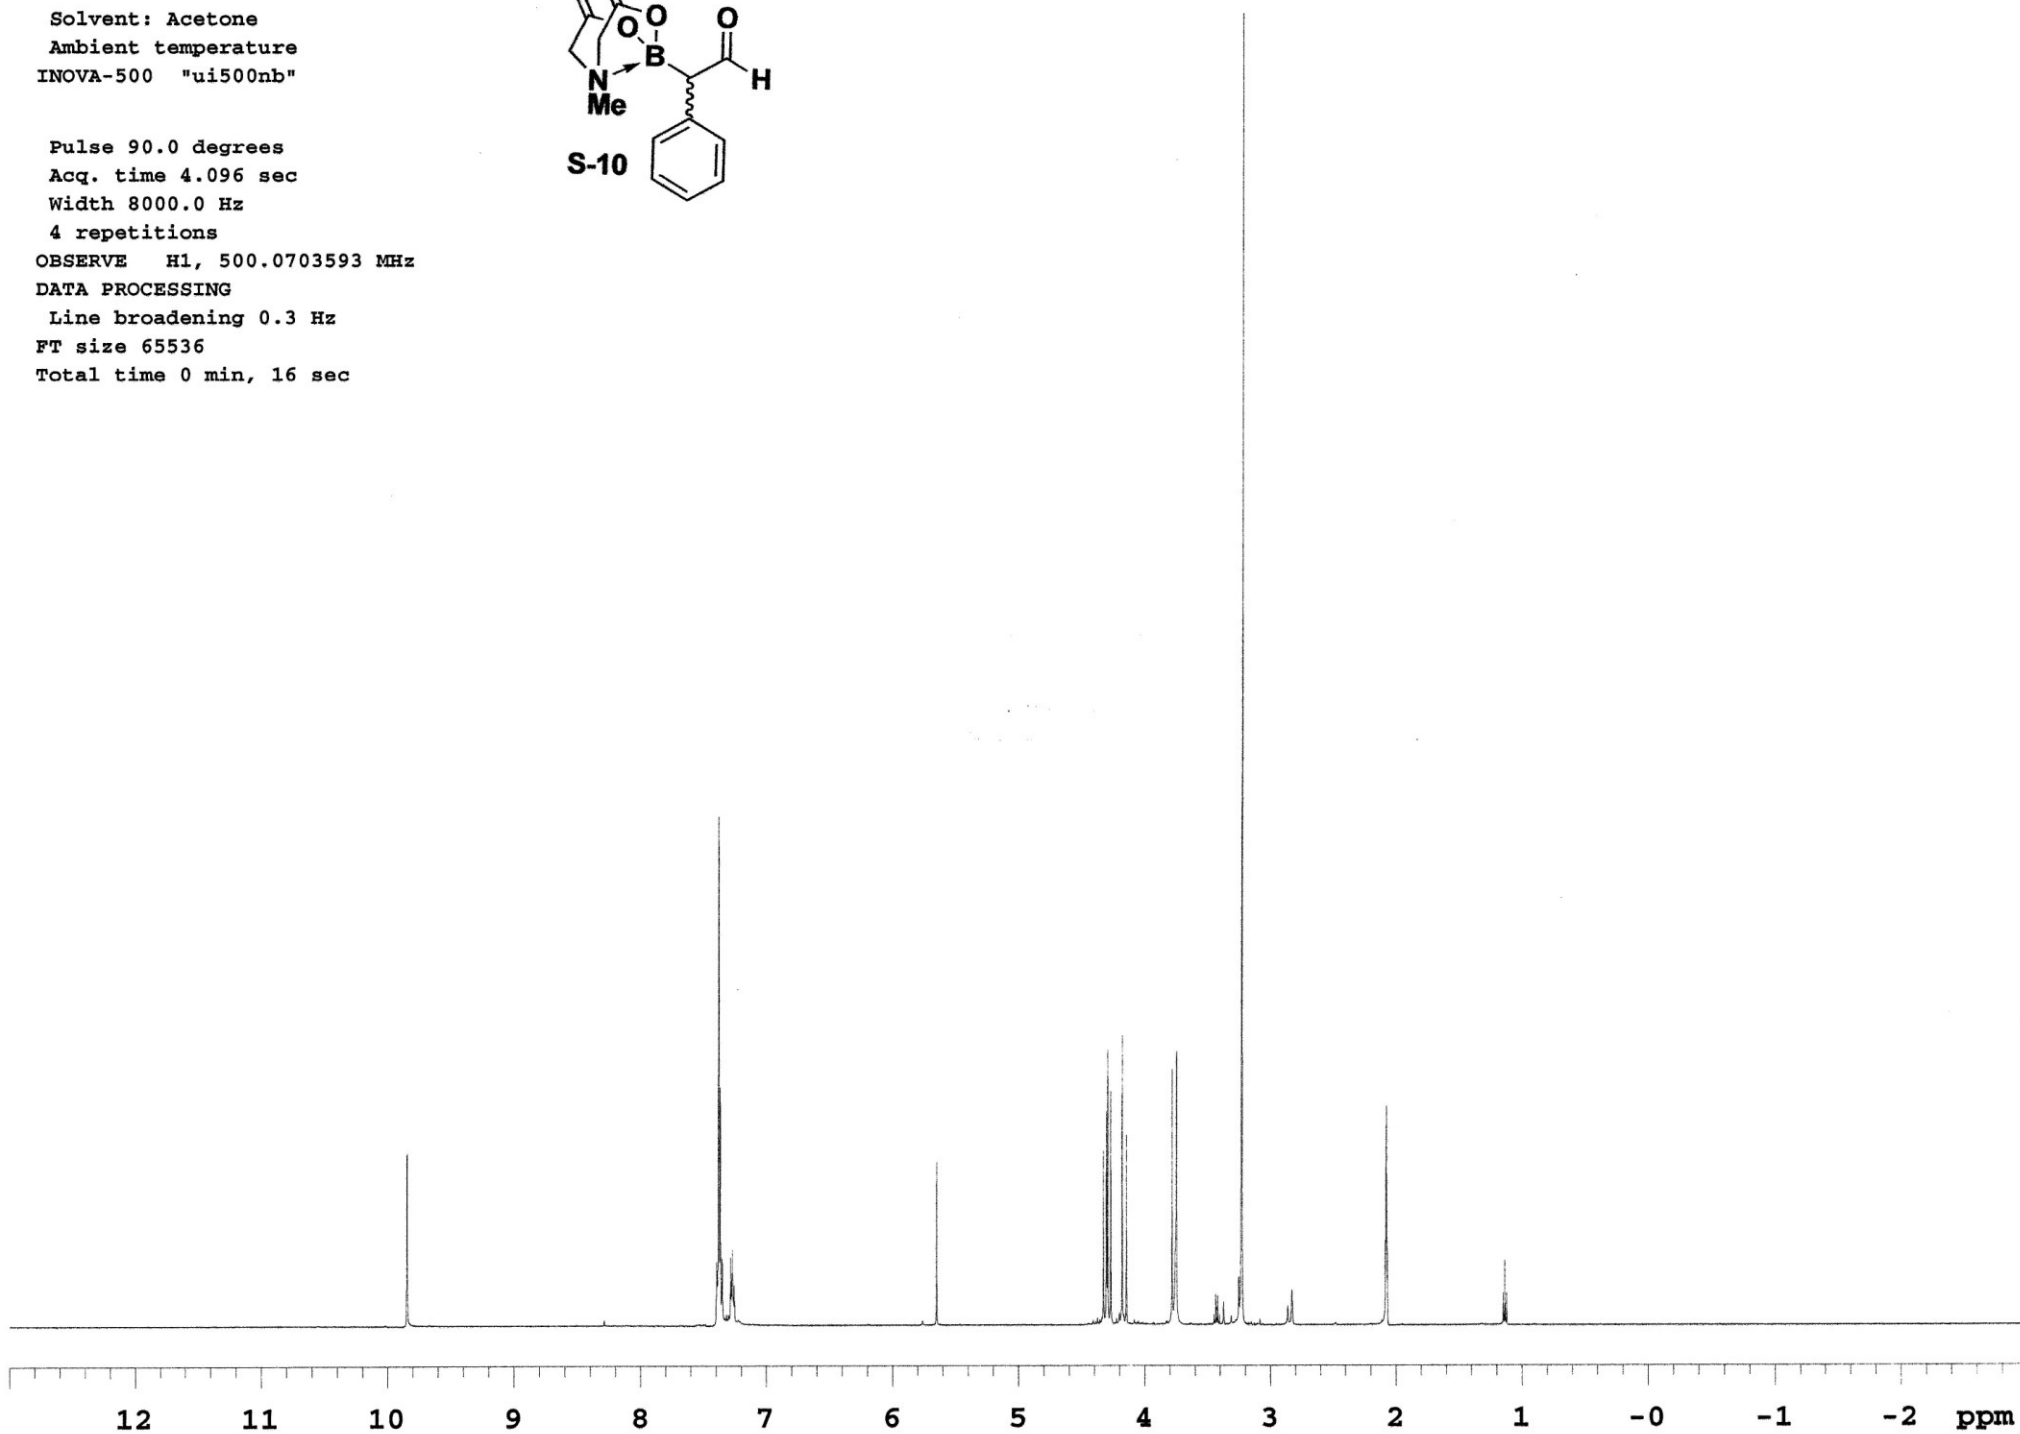

S-138

Pulse Sequence: s2pul

Solvent: Acetone  
Ambient temperature  
User: 1-14-87  
INOVA-500 "u500"

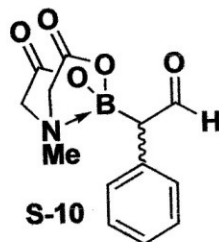

Relax. delay 1.000 sec  
Pulse 42.4 degrees  
Acq. time 1.086 sec  
Width 30165.9 Hz  
400 repetitions  
OBSERVE C13, 125.6478647 MHz  
DECOUPLE H1, 499.6949209 MHz  
Power 44 dB  
continuously on  
WALTZ-16 modulated  
DATA PROCESSING  
Line broadening 1.0 Hz  
FT size 65536  
Total time 34 min, 57 sec

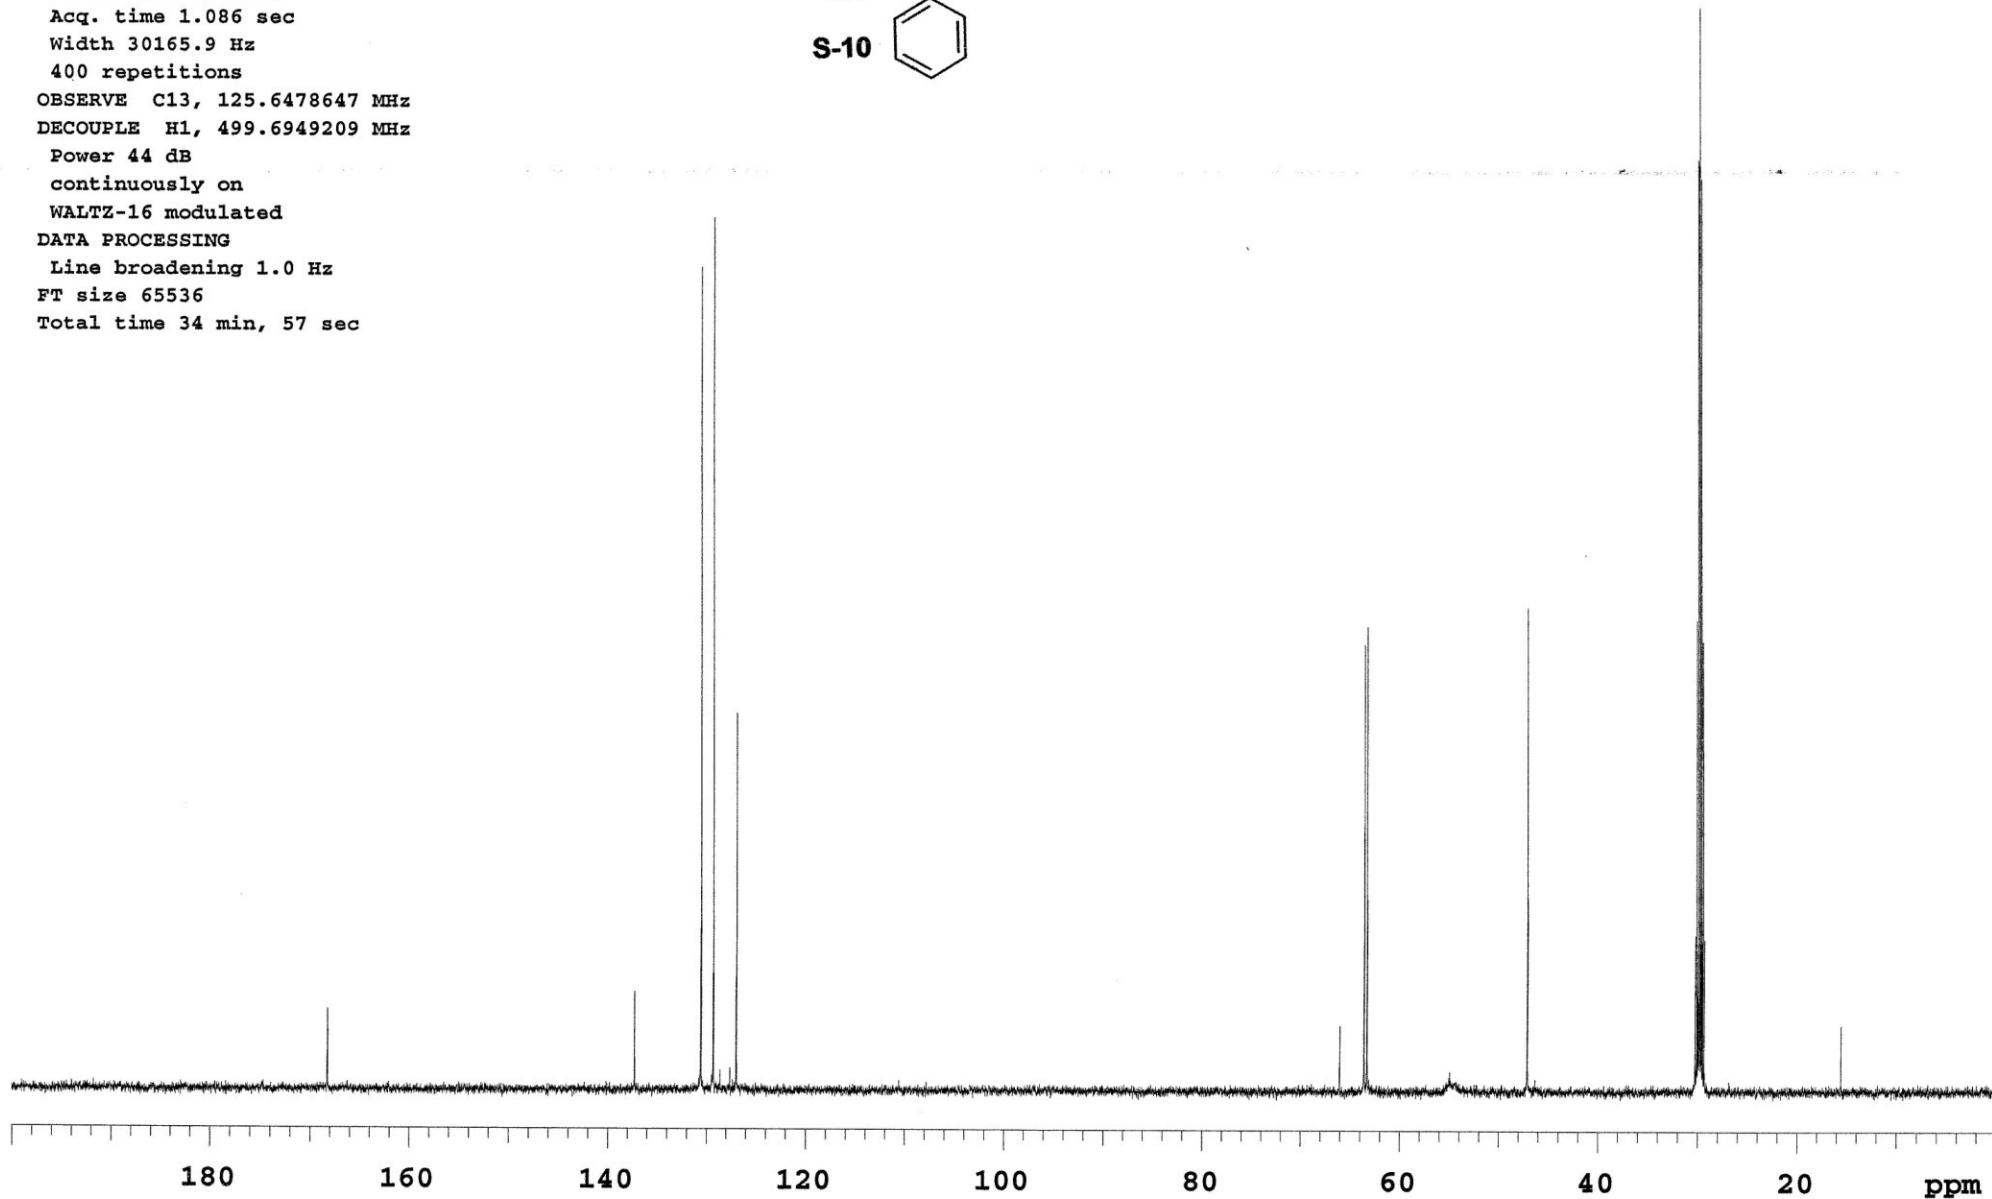

S-139

Pulse Sequence: s2pul

Solvent: Acetone  
Ambient temperature  
INOVA-500 "vvr500"

Pulse 45.0 degrees  
Acq. time 4.096 sec  
Width 8000.0 Hz  
8 repetitions  
OBSERVE H1, 499.4324931 MHz  
DATA PROCESSING  
Line broadening 0.3 Hz  
FT size 65536  
Total time 0 min, 32 sec

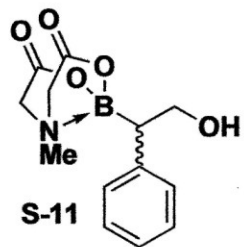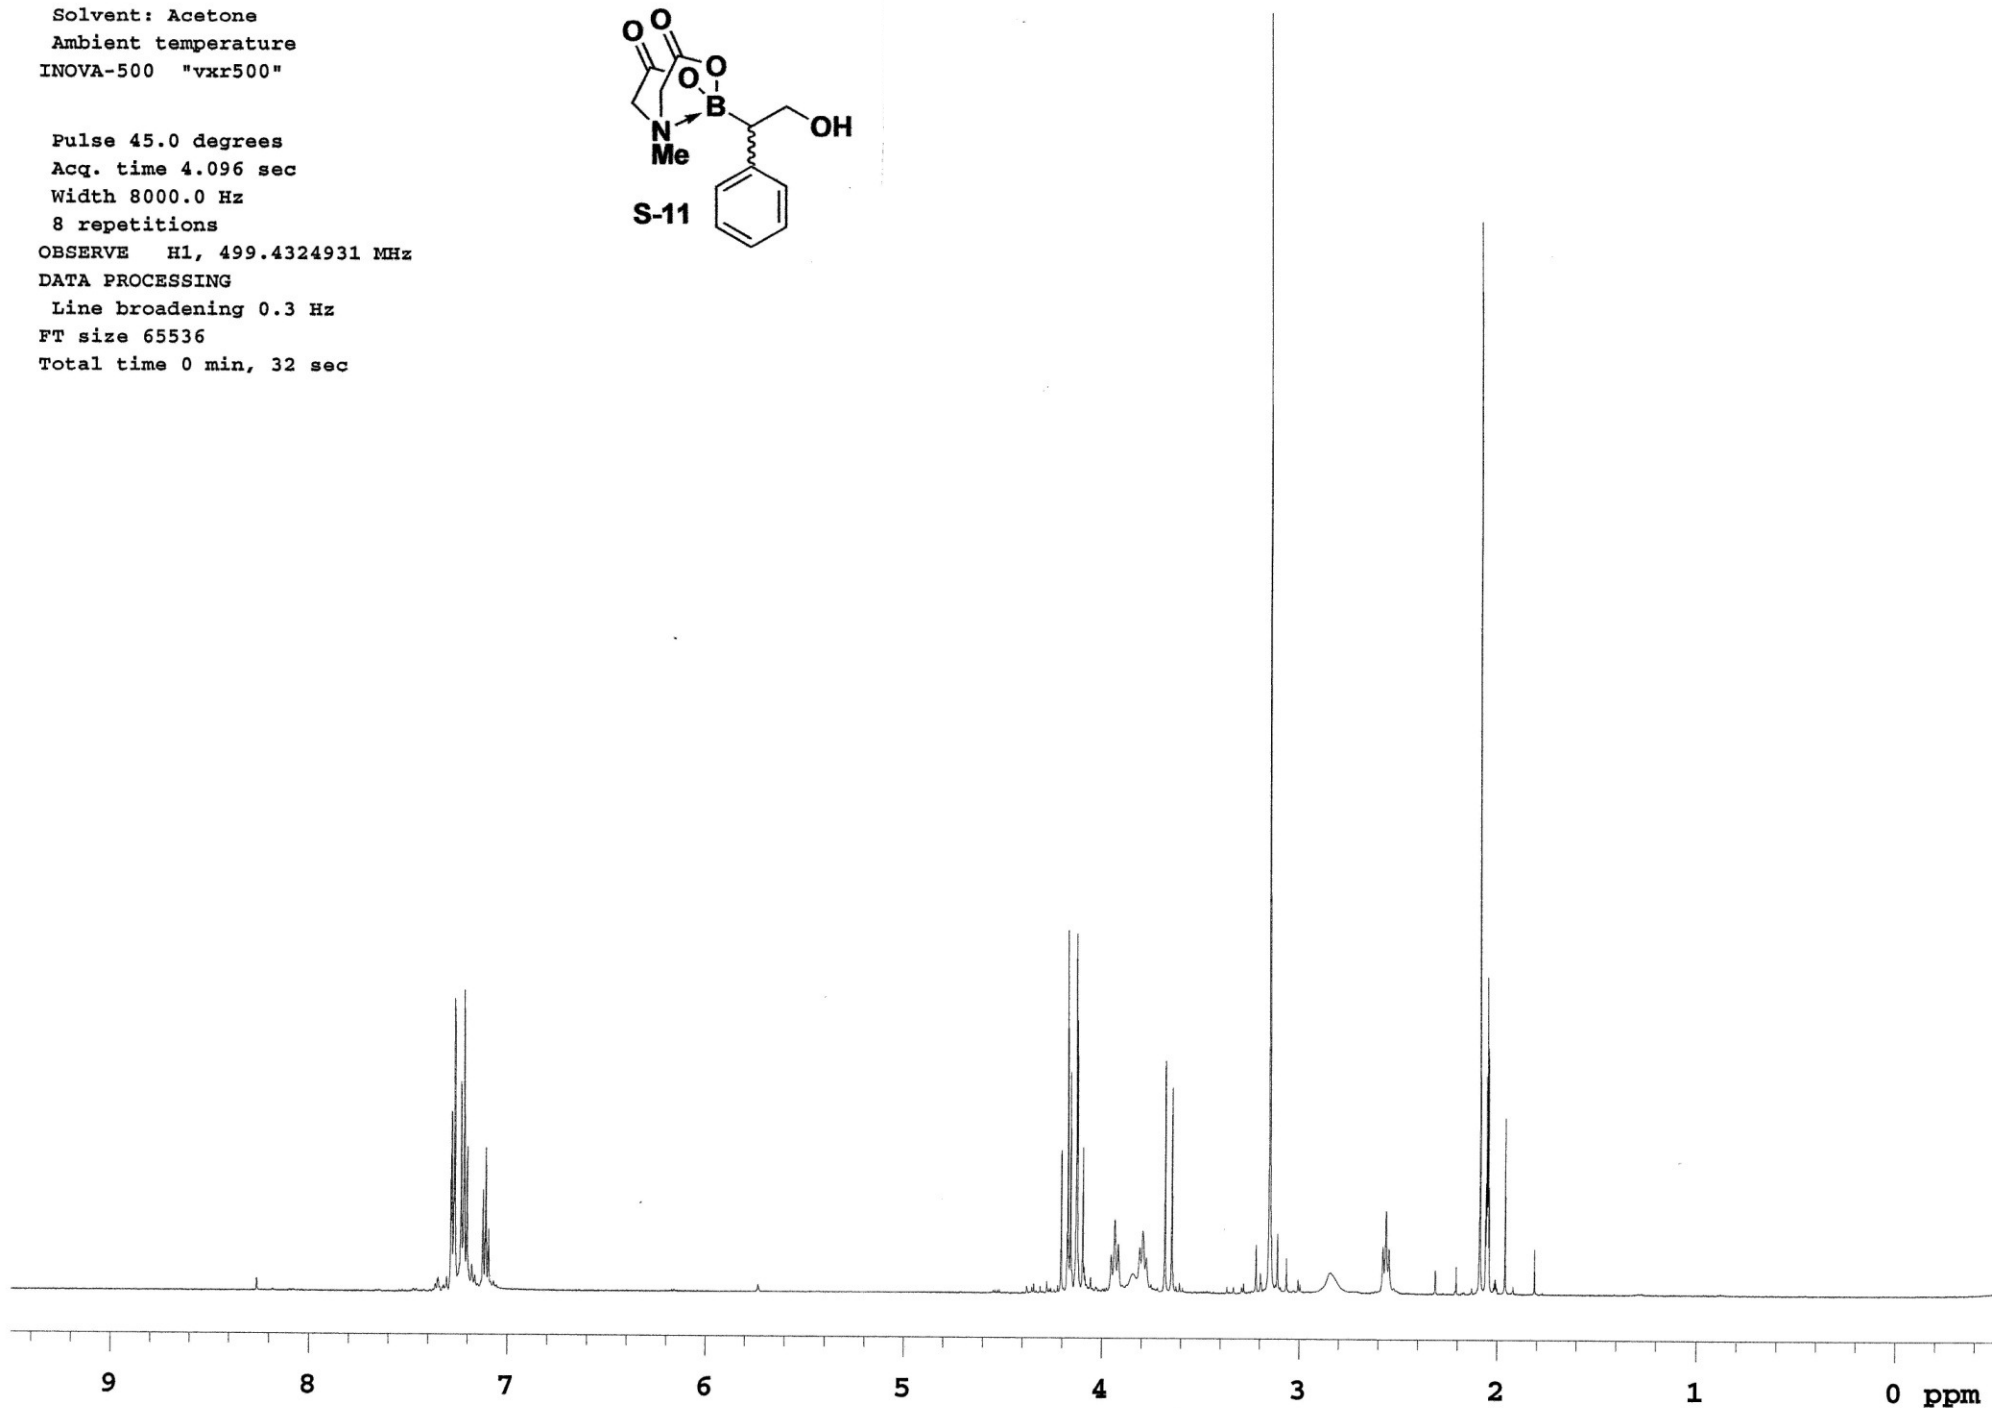

S-140

Pulse Sequence: s2pul

Solvent: Acetone  
Ambient temperature  
User: 1-14-87  
INOVA-500 "u500"

Relax. delay 1.000 sec  
Pulse 42.4 degrees  
Acq. time 1.086 sec  
Width 30165.9 Hz  
432 repetitions  
OBSERVE C13, 125.6478620 MHz  
DECOUPLE H1, 499.6949209 MHz  
Power 44 dB  
continuously on  
WALTZ-16 modulated  
DATA PROCESSING  
Line broadening 1.0 Hz  
FT size 65536  
Total time 34 min, 57 sec

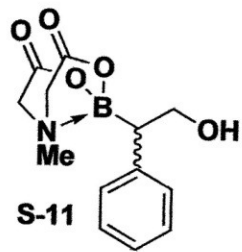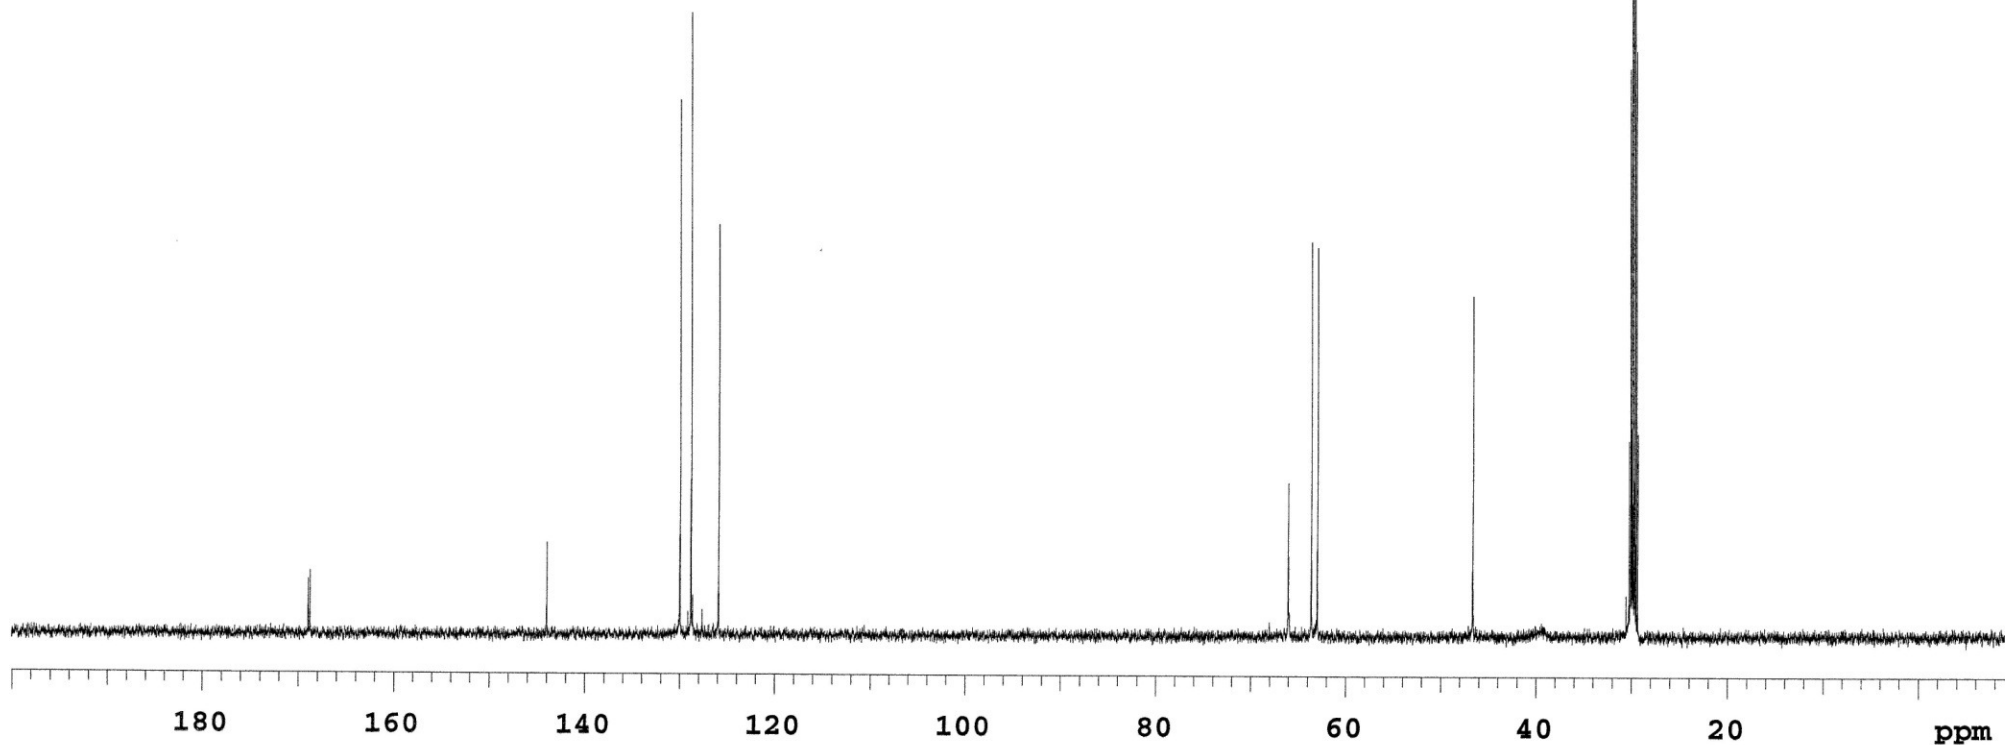

Pulse Sequence: s2pul

Solvent: Acetone  
Ambient temperature  
INOVA-500 "vkr500"

Pulse 45.0 degrees  
Acq. time 4.096 sec  
Width 6991.8 Hz  
4 repetitions  
OBSERVE H1, 499.4324856 MHz  
DATA PROCESSING  
Line broadening 0.3 Hz  
FT size 65536  
Total time 0 min, 16 sec

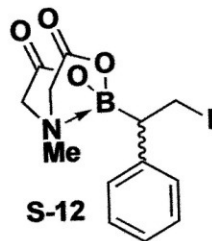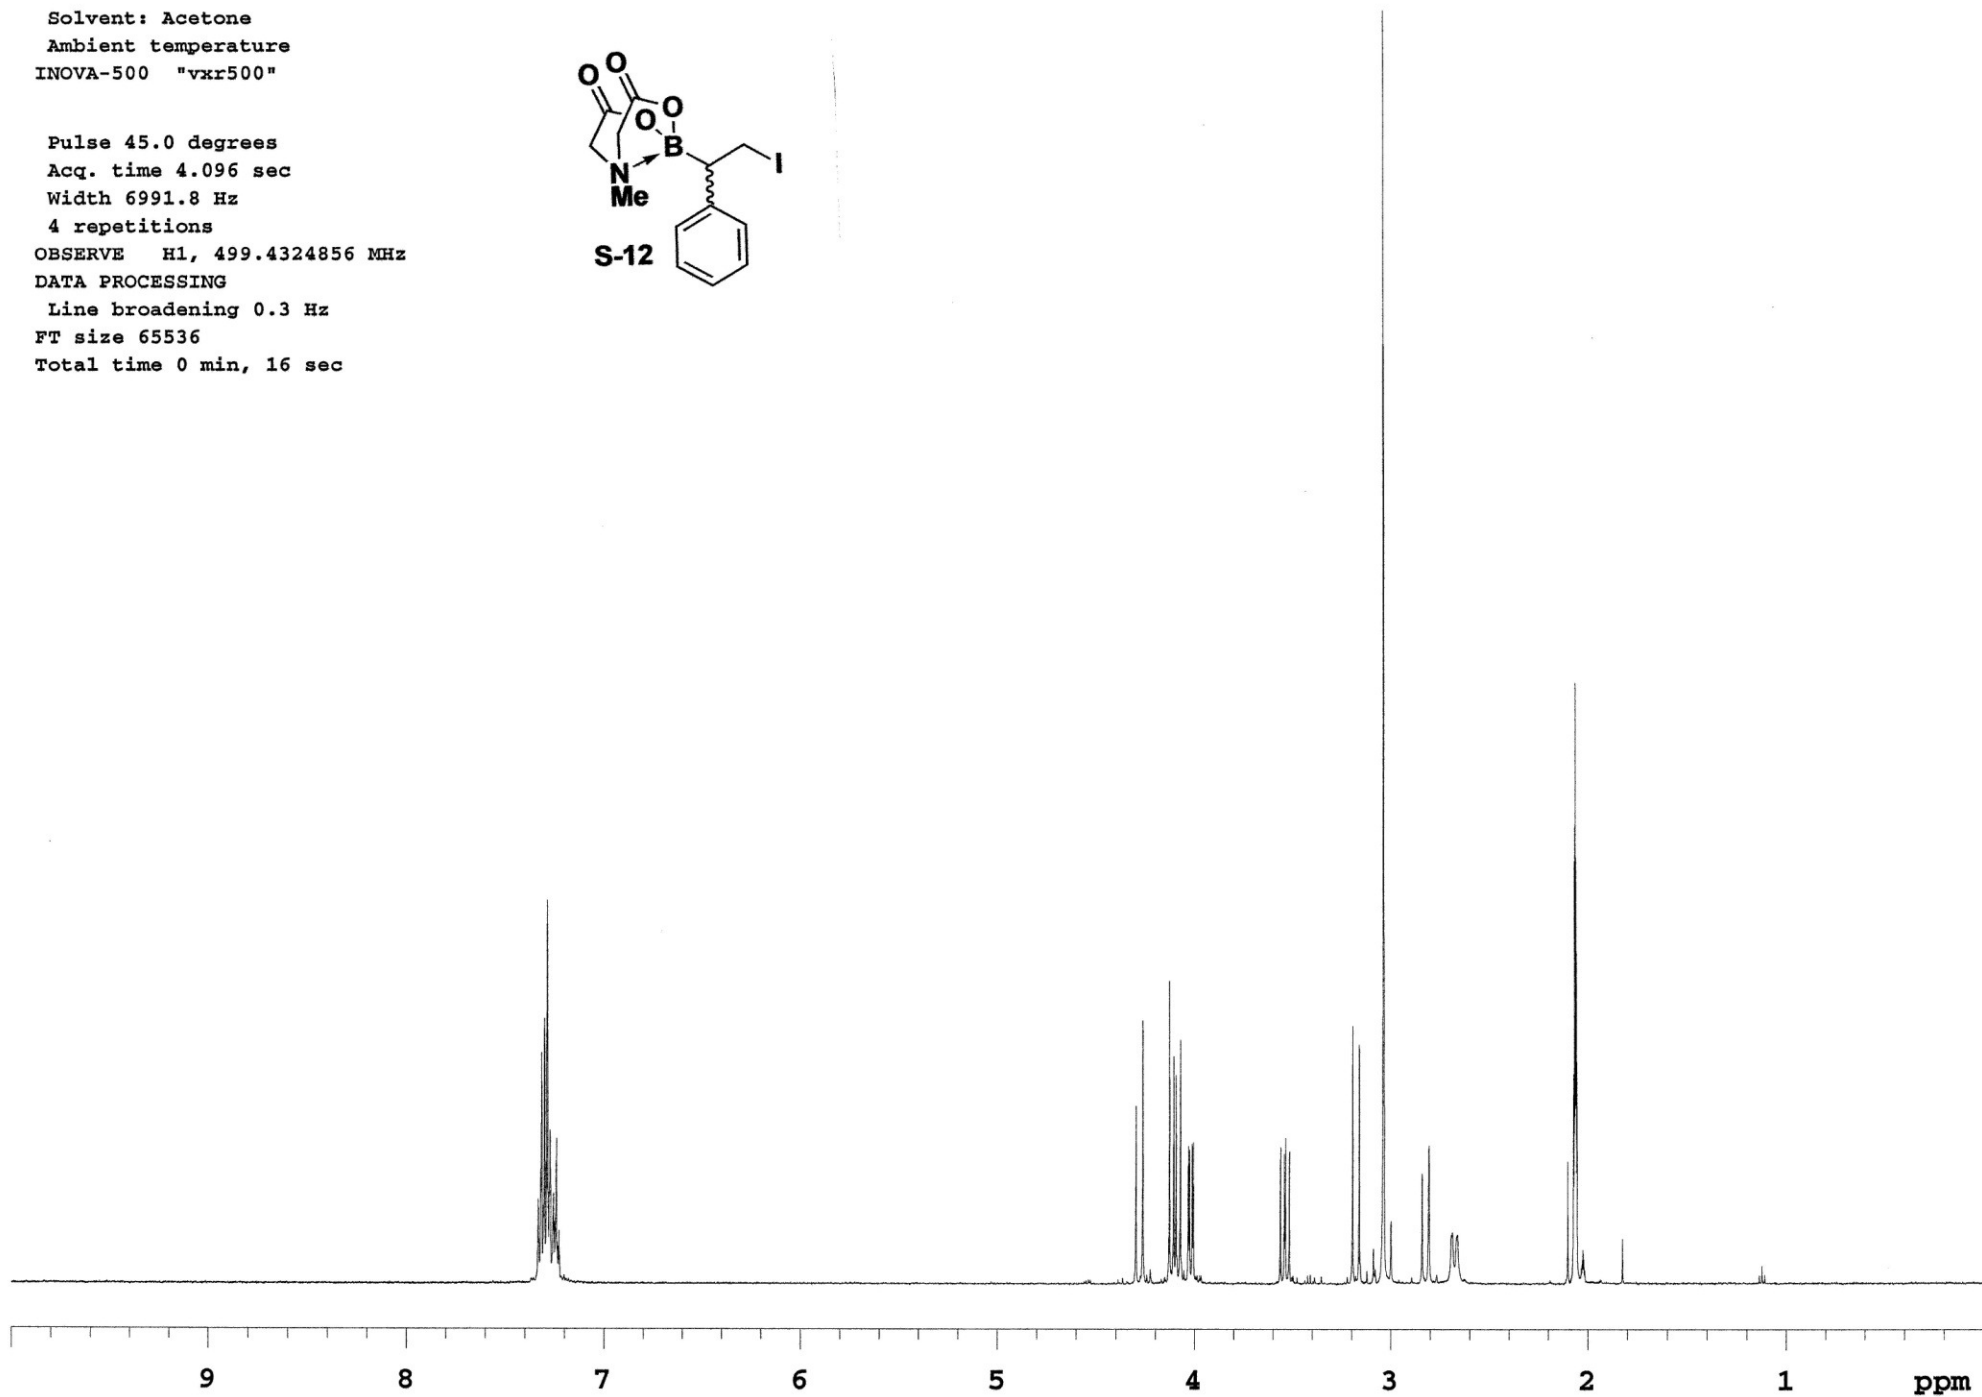

S-142

Pulse Sequence: s2pul

Solvent: Acetone

Ambient temperature

User: 1-14-87

File: C13\_060811\_JL\_racemic-iodide

INOVA-500 "sunds1"

Relax. delay 1.000 sec

Pulse 42.4 degrees

Acq. time 1.086 sec

Width 30165.9 Hz

320 repetitions

OBSERVE C13, 125.6478629 MHz

DECOUPLE H1, 499.6949209 MHz

Power 44 dB

continuously on

WALTZ-16 modulated

DATA PROCESSING

Line broadening 1.0 Hz

FT size 65536

Total time 34 min, 57 sec

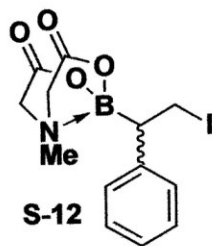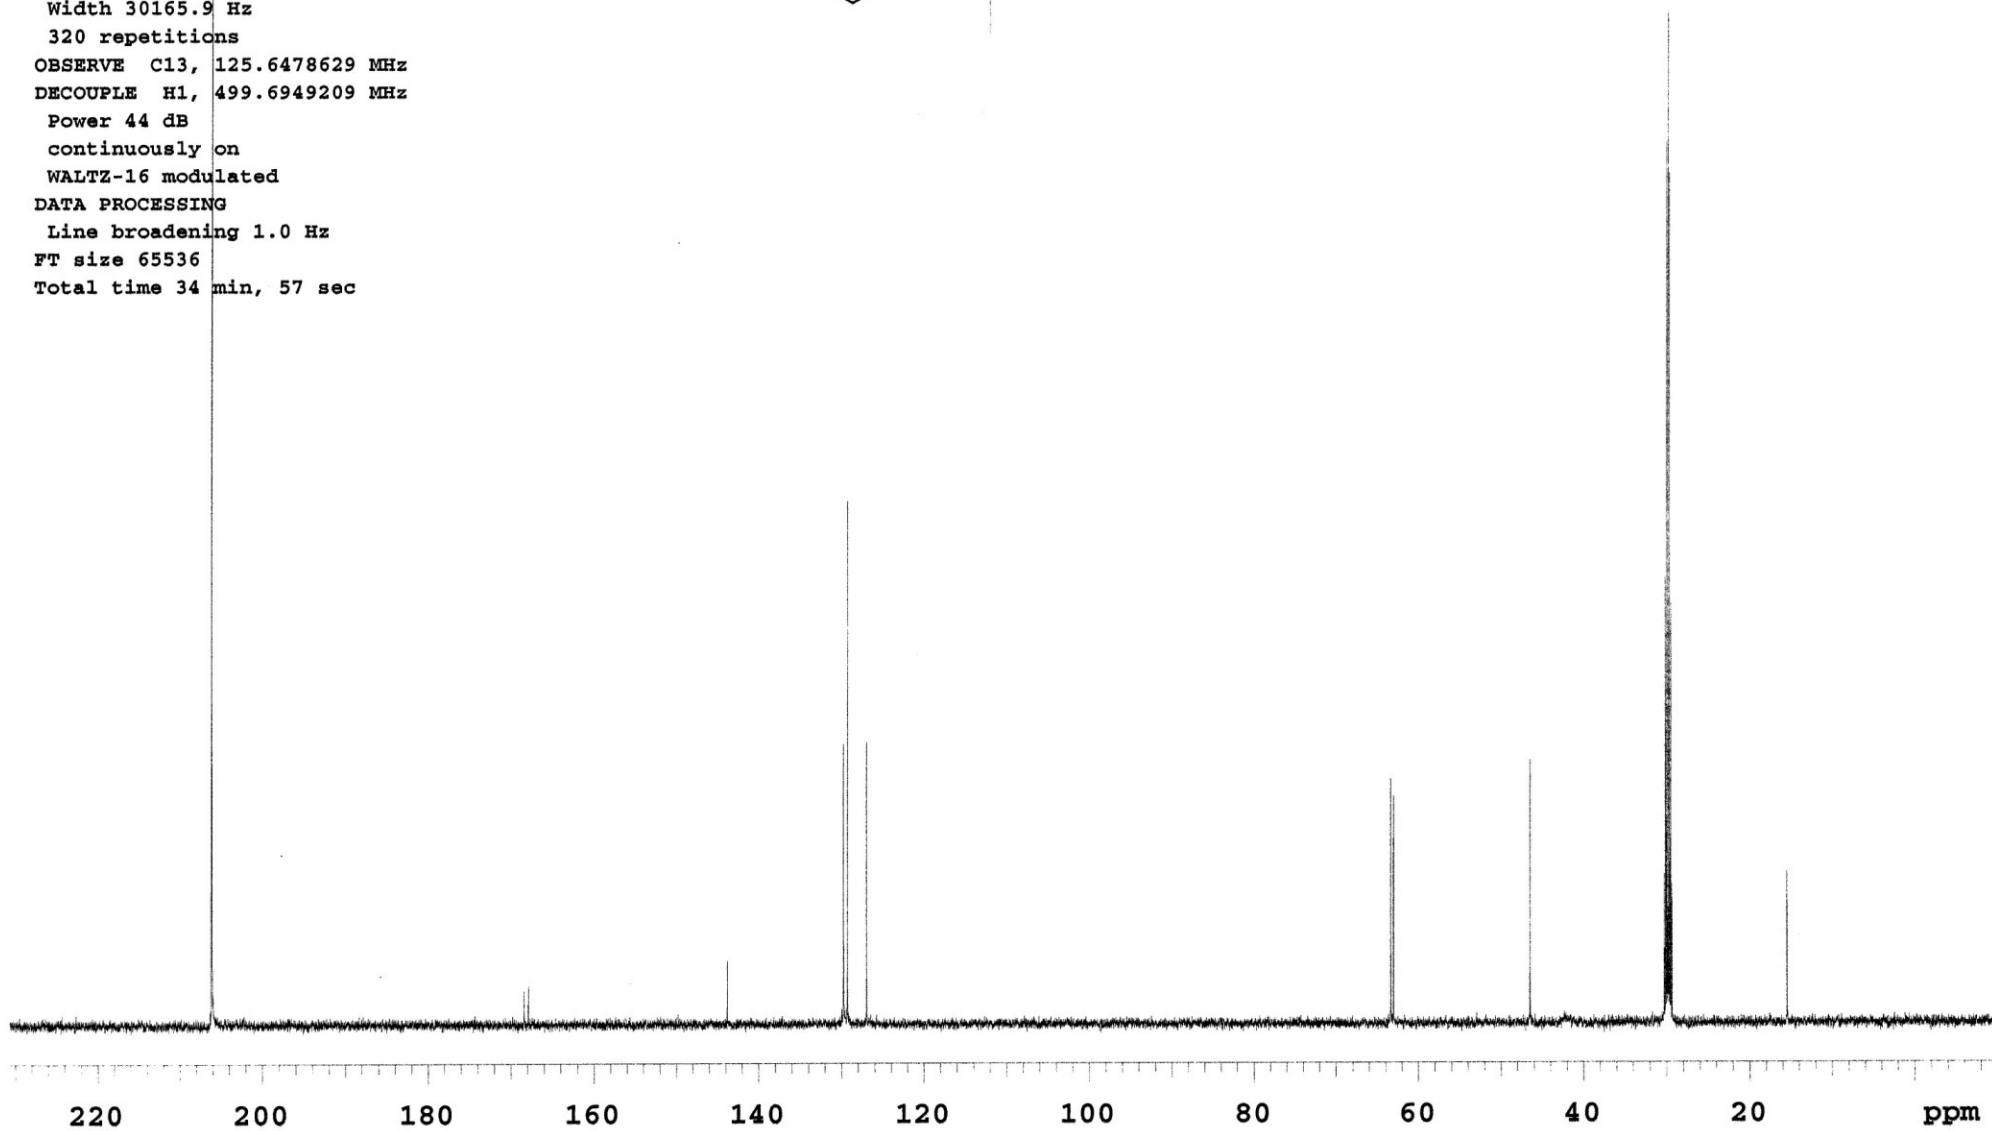

S-143

Pulse Sequence: s2pul

Solvent: Acetone  
Ambient temperature  
INOVA-500 "vkr500"

Pulse 45.0 degrees  
Acq. time 4.096 sec  
Width 8000.0 Hz  
8 repetitions  
OBSERVE H1, 499.4324934 MHz  
DATA PROCESSING  
Line broadening 0.3 Hz  
FT size 65536  
Total time 0 min, 32 sec

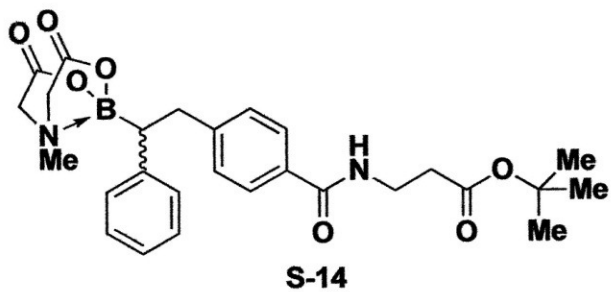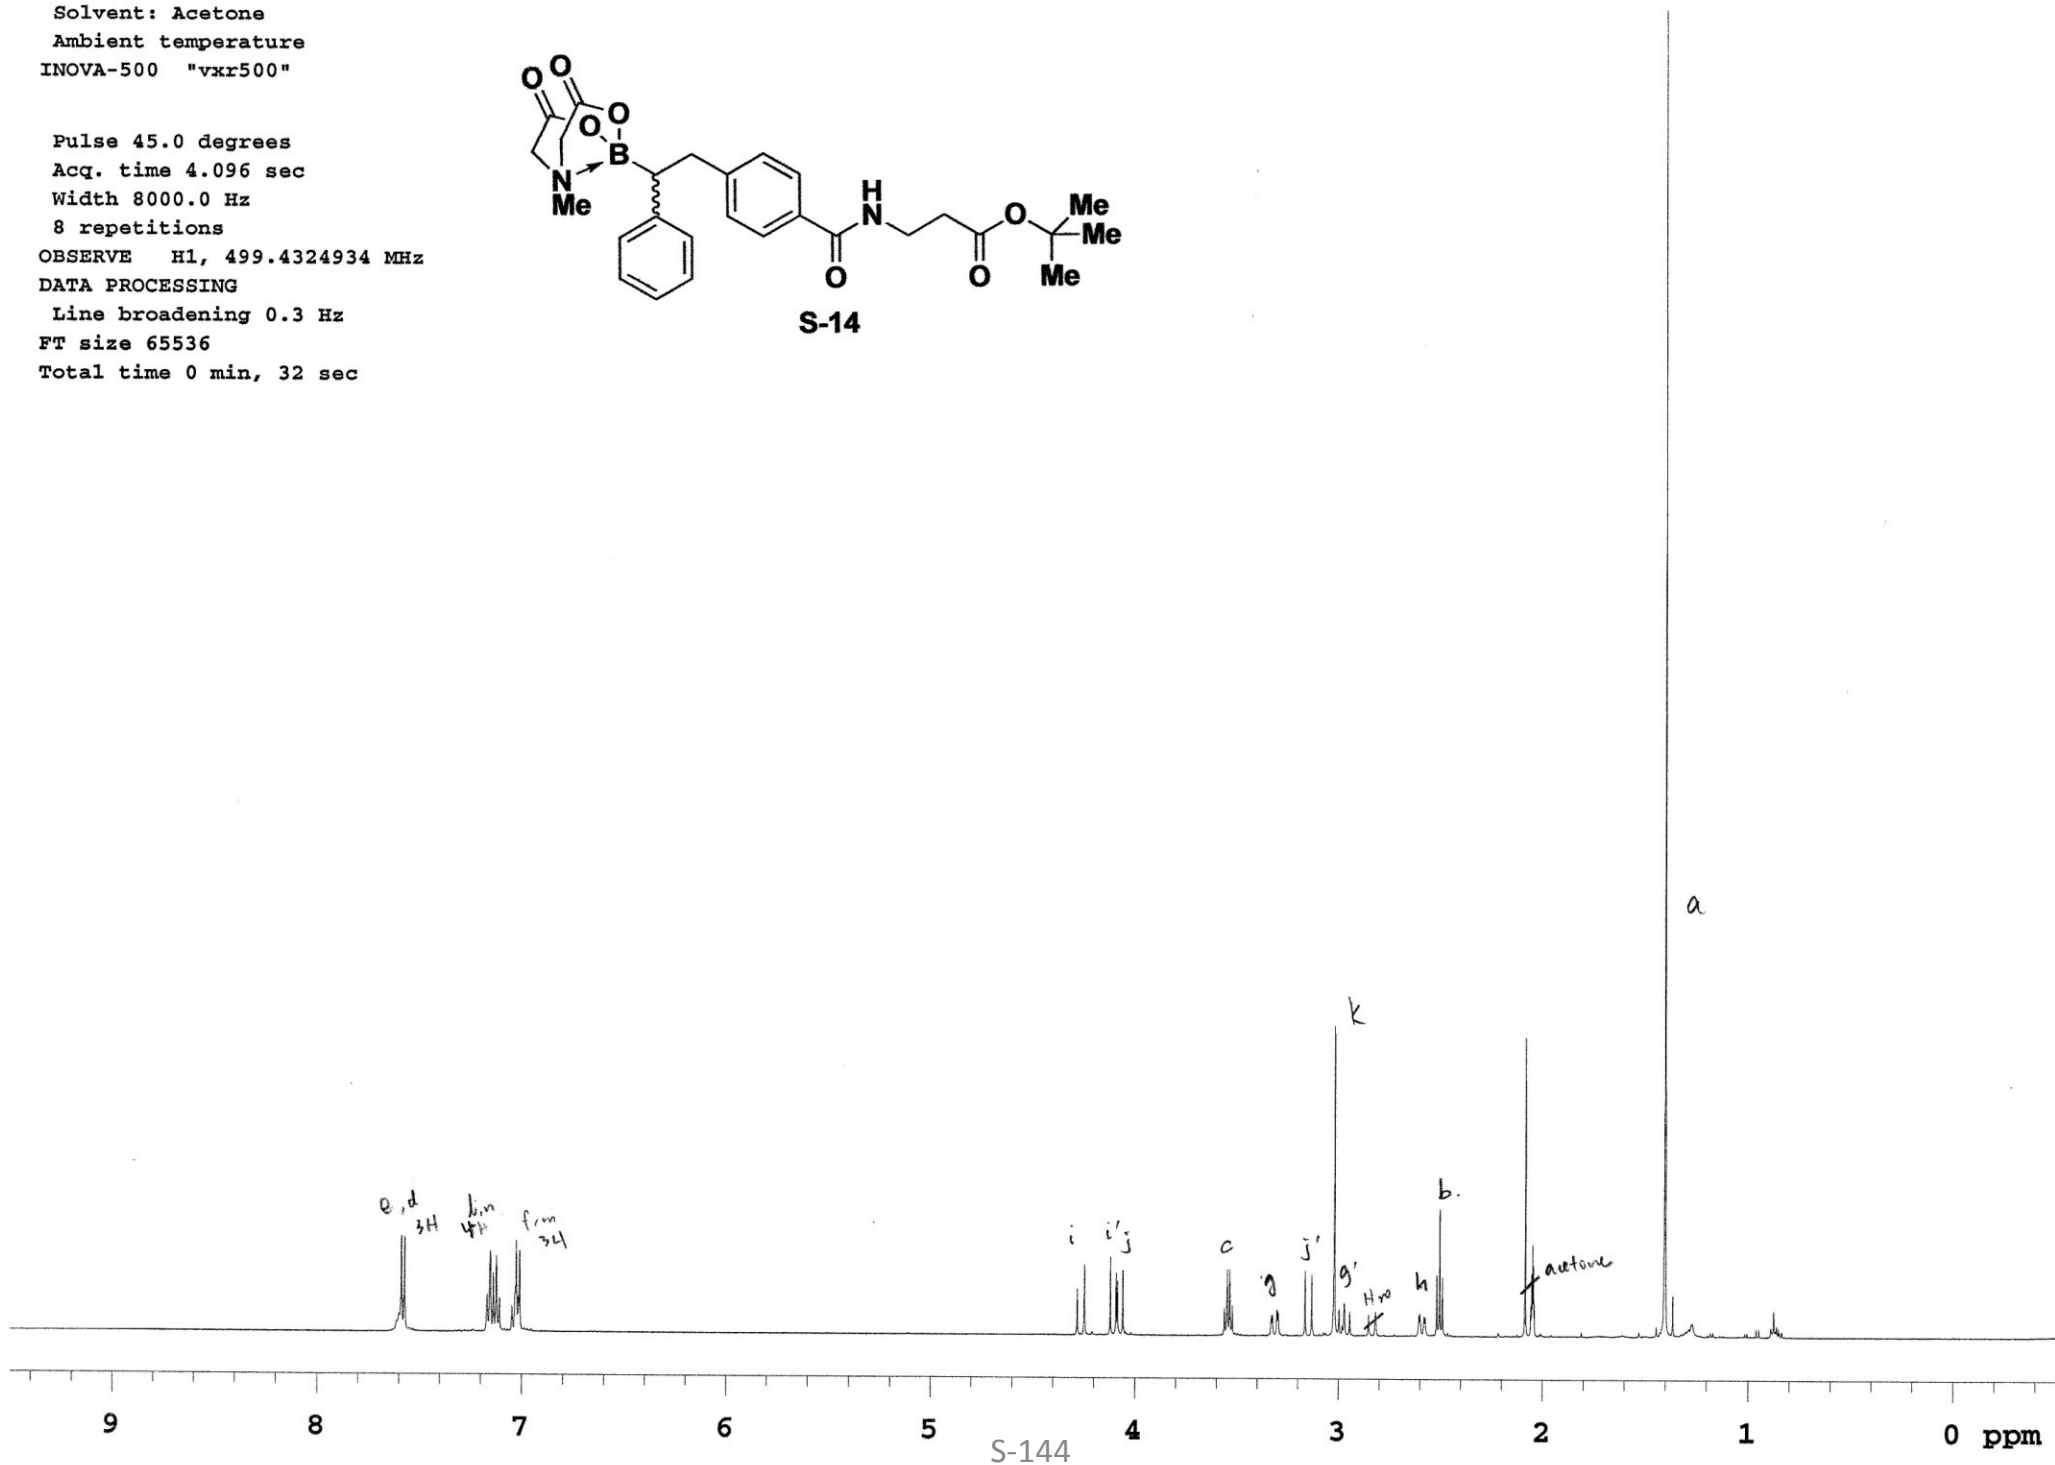



Pulse Sequence: s2pul

Solvent: Acetone  
Ambient temperature  
Operator: user1d  
INOVA-400 "u400"

Relax. delay 1.000 sec  
Pulse 45.0 degrees  
Acq. time 1.311 sec  
Width 25000.0 Hz  
864 repetitions  
OBSERVE C13, 100.5667972 MHz  
DECOUPLE H1, 399.9488299 MHz  
Power 45 dB  
continuously on  
WALTZ-16 modulated  
DATA PROCESSING  
Line broadening 1.0 Hz  
FT size 65536  
Total time 6 hr, 26 min, 35 sec

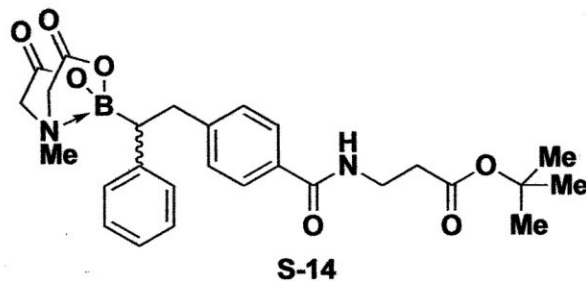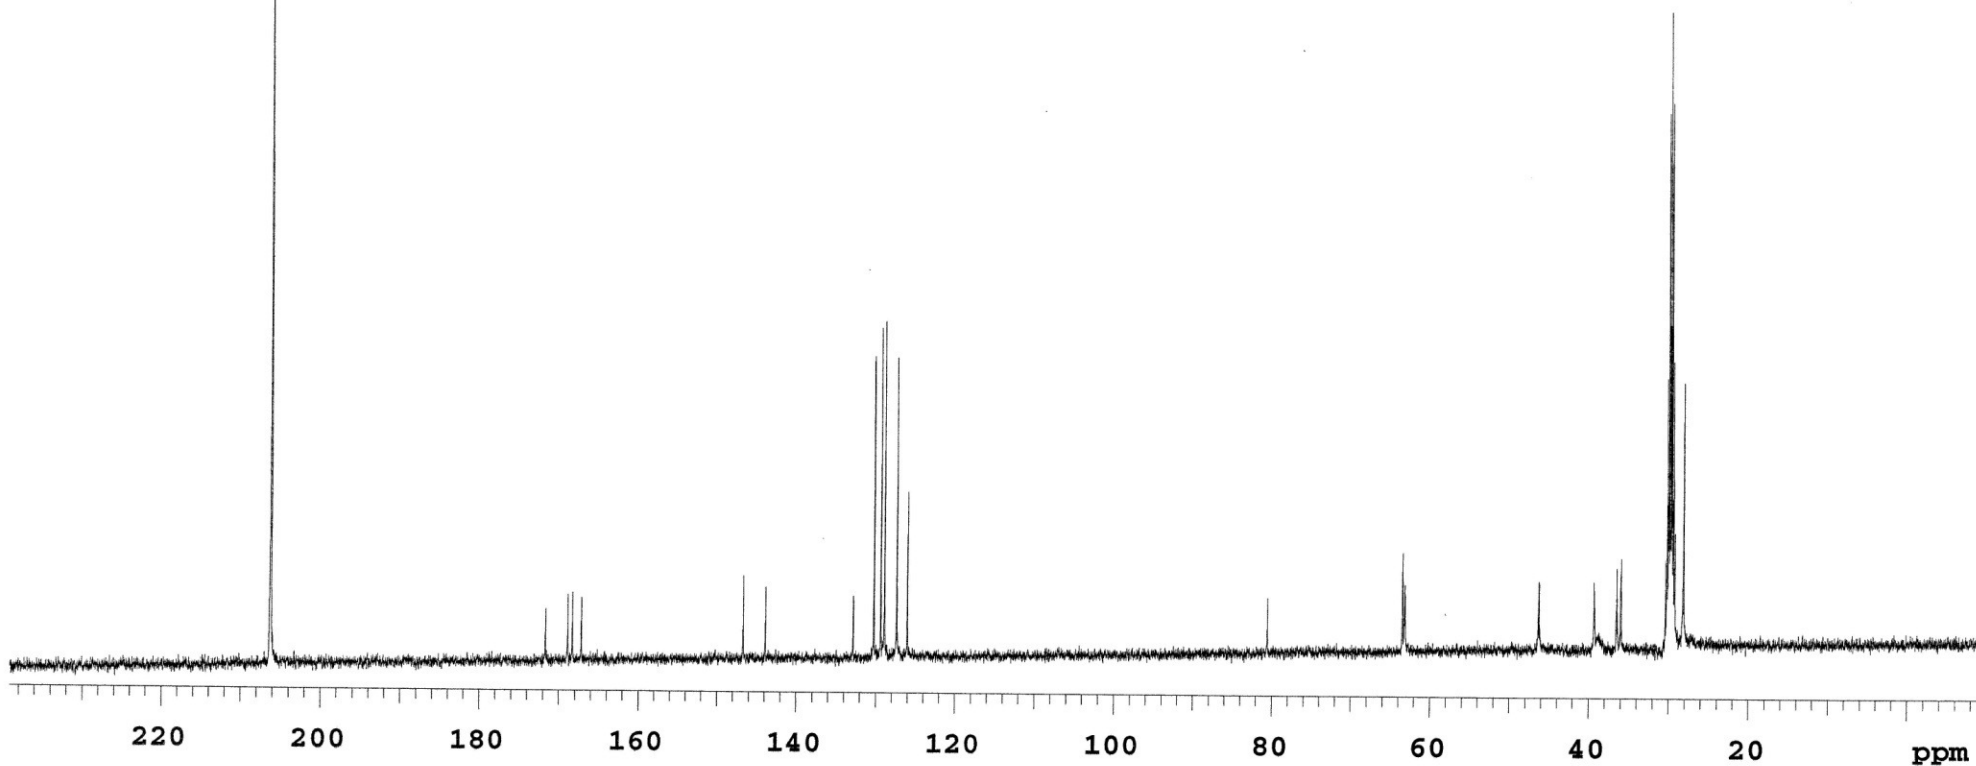

Supplement: ja205912y_si_002.pdf [file ja205912y_si_002.pdf]
